# Supplementary material for: Transcriptome analysis of Chelidonium majus elaiosomes and seeds provide insights into fatty acid biosynthesis
Source: PeerJ. 2019 May 3;7:e6871. doi: 10.7717/peerj.6871 (PMC6501766; doi:10.7717/peerj.6871)
Supplement: Supplemental Information 1 [file peerj-07-6871-s001.xlsx]

## Sheet: Ch01vsCh02
seq_id	Ch01_mean_fpkm	Ch02_mean_fpkm	logFC(Ch02/Ch01)	p-value	FDR	significant	regulate	Gene_ID	KEGG_Gene	KEGG_Pathway
c1330_g2	39.98	0.03	-8.28	2.14e-139	8.05e-135	yes	down	_	_	_
c1978_g1	0.57	80.62	6.92	1.89e-116	3.54e-112	yes	up	_	_	_
c71707_g2	0.24	96.59	8.16	5.94e-97	7.43e-93	yes	up	K00430	E1.11.1.7	path:ko00940;path:ko01100;path:ko01110
c50932_g2	8.82	289.35	5.02	1.43e-92	1.34e-88	yes	up	K08913	LHCB2	path:ko00196;path:ko01100
c62208_g1	6.58	179.81	4.75	4.84e-85	3.63e-81	yes	up	_	_	_
c94081_g1	0.55	44.41	6.09	1.96e-82	1.23e-78	yes	up	_	_	_
c64047_g1	0.24	56.24	7.36	4.05e-76	2.17e-72	yes	up	_	_	_
c55308_g1	0.42	52.37	6.65	5.12e-59	2.16e-55	yes	up	_	_	_
c15713_g1	15.06	0.43	-4.84	5.19e-59	2.16e-55	yes	down	K15402	CYP86B1	path:ko00073
c60745_g1	0.1	47.49	7.87	6.61e-59	2.48e-55	yes	up	_	_	_
c71228_g3	255.59	55.57	-2.2	8.37e-50	2.85e-46	yes	down	K09422	MYBP	_
c47224_g1	0.15	66.96	8.05	2.57e-48	8.02e-45	yes	up	_	_	_
c61070_g1	1.41	33.51	4.48	3.68e-47	1.06e-43	yes	up	_	_	_
c66470_g1	0.12	22.97	6.72	4.77e-47	1.28e-43	yes	up	_	_	_
c67523_g1	0.01	9.93	6.55	1.42e-46	3.56e-43	yes	up	_	_	_
c8401_g1	8.11	135.15	4.04	1.16e-45	2.73e-42	yes	up	_	_	_
c63221_g1	4.35	58.77	3.73	2.05e-45	4.52e-42	yes	up	_	_	_
c64245_g1	29.97	421.63	3.81	3.24e-44	6.76e-41	yes	up	K13412	CPK	path:ko04626;path:ko05145
c855_g1	0.32	37.71	6.5	4.71e-44	9.3e-41	yes	up	_	_	_
c69850_g1	16.49	291.58	4.14	5.42e-44	1.02e-40	yes	up	K09338	HD-ZIP	_
c70740_g3	5.57	79.82	3.82	3.07e-43	5.49e-40	yes	up	K14157	AASS	path:ko00310;path:ko01100;path:ko01110;path:ko01130
c29213_g1	0.02	9.33	6.31	6.39e-43	1.09e-39	yes	up	K01051	E3.1.1.11	path:ko00040;path:ko00500;path:ko01100
c67367_g1	121.94	2.08	-5.8	2.66e-42	4.35e-39	yes	down	_	_	_
c66690_g4	62.86	6.05	-3.36	4.26e-42	6.67e-39	yes	down	_	_	_
c109266_g1	2.94	118.36	5.28	1.24e-41	1.86e-38	yes	up	_	_	_
c52653_g1	2.27	29.68	3.65	1.48e-41	2.13e-38	yes	up	_	_	_
c58369_g3	151.82	23.51	-2.69	1.78e-40	2.47e-37	yes	down	_	_	_
c46380_g1	0.76	20.54	4.59	2.42e-40	3.24e-37	yes	up	_	_	_
c1330_g1	30.89	0	-8.28	4.95e-40	6.41e-37	yes	down	_	_	_
c61571_g1	0	9.94	6.65	2.14e-39	2.68e-36	yes	up	K10529	DOX1	path:ko00592
c40312_g1	3.37	41.75	3.59	3.04e-39	3.68e-36	yes	up	K09287	RAV	_
c44833_g1	26.03	2.75	-3.19	8.06e-39	9.46e-36	yes	down	_	_	_
c37036_g2	3.66	69.87	4.22	1.59e-38	1.81e-35	yes	up	K09840	NCED	path:ko00906;path:ko01100;path:ko01110
c58984_g1	1.39	46.29	4.96	3.65e-38	4.03e-35	yes	up	_	_	_
c55292_g1	8.9	62.41	2.8	1.33e-37	1.43e-34	yes	up	K09338	HD-ZIP	_
c55319_g1	7.99	56.89	2.82	2.87e-36	2.99e-33	yes	up	_	_	_
c57141_g1	128.46	22.66	-2.5	5.04e-36	5.11e-33	yes	down	_	_	_
c58144_g1	1.17	37.28	4.88	2.74e-34	2.7e-31	yes	up	_	_	_
c57690_g2	1.2	46.15	5.16	3.15e-34	3.03e-31	yes	up	K09873	TIP	_
c55401_g1	946.96	26.46	-5.16	5.93e-34	5.56e-31	yes	down	_	_	_
c54521_g1	38.33	201.79	2.39	1.37e-33	1.25e-30	yes	up	K14332	psaO	path:ko00195
c57383_g3	0.97	33.96	4.99	2.62e-33	2.34e-30	yes	up	_	_	_
c67848_g2	33.62	6.13	-2.44	8.1e-33	7.03e-30	yes	down	K00913	ITPK1	path:ko00562;path:ko01100;path:ko04070
c65664_g1	19.34	1.51	-3.59	8.24e-33	7.03e-30	yes	down	_	_	_
c49696_g1	0.01	3.66	5.09	1.48e-32	1.23e-29	yes	up	_	_	_
c108799_g1	4.5	53	3.53	2.93e-32	2.39e-29	yes	up	_	_	_
c30980_g1	54.13	5.13	-3.37	6.87e-32	5.48e-29	yes	down	K03574	mutT, NUDT15, MTH2	_
c49442_g1	0.61	25.72	5.19	1.02e-31	7.98e-29	yes	up	_	_	_
c48146_g1	6.84	95.78	3.79	4.01e-31	3.07e-28	yes	up	_	_	_
c15525_g1	10.87	48.79	2.16	4.27e-31	3.2e-28	yes	up	_	_	_
c97132_g1	0.57	69.9	6.71	8.96e-31	6.59e-28	yes	up	_	_	_
c68992_g1	0.47	21.45	5.23	1.31e-30	9.47e-28	yes	up	_	_	_
c8492_g1	0.16	11.88	5.53	1.85e-30	1.31e-27	yes	up	_	_	_
c65491_g1	2.5	38.41	3.89	1.91e-30	1.33e-27	yes	up	_	_	_
c65857_g1	1.14	18.81	3.94	2.33e-30	1.59e-27	yes	up	_	_	_
c8579_g1	1.65	47.02	4.75	5.62e-30	3.77e-27	yes	up	K14487	GH3	path:ko04075
c71365_g1	4.19	21.02	2.3	1.02e-29	6.69e-27	yes	up	K01537	E3.6.3.8	_
c68840_g1	23.71	3.64	-2.67	1.14e-29	7.31e-27	yes	down	_	_	_
c80896_g1	0.54	20.2	5	1.15e-29	7.31e-27	yes	up	_	_	_
c63189_g1	12.66	69.2	2.44	4.73e-29	2.96e-26	yes	up	K05391	CNGF	path:ko04626
c63409_g2	27.53	4.94	-2.45	9.63e-29	5.92e-26	yes	down	_	_	_
c67024_g1	69.32	18.73	-1.88	1.52e-28	9.21e-26	yes	down	K08232	E1.6.5.4	path:ko00053;path:ko01100
c35816_g1	0.04	8.06	5.86	1.55e-28	9.24e-26	yes	up	_	_	_
c70146_g1	27.57	79.32	1.52	1.75e-28	1.02e-25	yes	up	K07025	K07025	_
c70895_g1	0.16	9.29	5.16	1.77e-28	1.02e-25	yes	up	_	_	_
c70496_g1	2.55	22.61	3.1	2.73e-28	1.55e-25	yes	up	K08241	E2.1.1.141	path:ko00592;path:ko01110
c19788_g1	92.75	2.07	-5.42	2.94e-28	1.65e-25	yes	down	K01915	glnA, GLUL	path:ko00220;path:ko00250;path:ko00630;path:ko00910;path:ko01100;path:ko01120;path:ko01230;path:ko02020;path:ko04724;path:ko04727
c64755_g2	0.09	6.95	5.23	3.12e-28	1.72e-25	yes	up	_	_	_
c62000_g1	0.05	6.82	5.49	4.73e-28	2.57e-25	yes	up	_	_	_
c19835_g1	15.85	101.7	2.67	4.99e-28	2.68e-25	yes	up	K08917	LHCB6	path:ko00196;path:ko01100
c61091_g2	2.21	22.86	3.31	1.05e-27	5.52e-25	yes	up	_	_	_
c41008_g1	73.07	390.26	2.42	2.41e-27	1.26e-24	yes	up	_	_	_
c94008_g1	9.16	59.21	2.68	3e-27	1.54e-24	yes	up	K00517	E1.14.-.-	path:ko00363;path:ko00624;path:ko00627;path:ko00903;path:ko00945;path:ko01100;path:ko01110;path:ko01120
c71252_g2	0.02	4.75	5.39	5.2e-27	2.64e-24	yes	up	_	_	_
c61267_g1	55.4	282.17	2.35	5.8e-27	2.9e-24	yes	up	K18857	ADH1	path:ko00010;path:ko00071;path:ko00350;path:ko00592;path:ko01100;path:ko01110;path:ko01120
c37906_g1	0.04	9.72	6.15	8.06e-27	3.98e-24	yes	up	K09873	TIP	_
c51701_g1	0.13	9.44	5.39	9.76e-27	4.75e-24	yes	up	_	_	_
c67713_g1	16.77	80.23	2.25	1.75e-26	8.43e-24	yes	up	_	_	_
c69070_g3	50.99	299.08	2.55	2.32e-26	1.1e-23	yes	up	_	_	_
c62176_g1	41.41	167.65	2.01	2.52e-26	1.18e-23	yes	up	K01183	E3.2.1.14	path:ko00520;path:ko01100
c68157_g1	59.07	10.68	-2.46	4.53e-26	2.1e-23	yes	down	K17193	UGT79B1	path:ko00942
c32784_g1	0.99	14.03	3.7	4.72e-26	2.16e-23	yes	up	_	_	_
c65037_g1	3.04	37.48	3.58	7.49e-26	3.38e-23	yes	up	K07088	K07088	_
c73404_g1	7.78	71.27	3.18	7.56e-26	3.38e-23	yes	up	_	_	_
c71929_g1	0.65	8.26	3.48	1.35e-25	5.95e-23	yes	up	_	_	_
c59242_g4	13.83	52.37	1.91	1.46e-25	6.39e-23	yes	up	_	_	_
c46490_g2	80.05	472.51	2.56	3.31e-25	1.43e-22	yes	up	_	_	_
c65678_g1	0.01	6.09	5.78	6.48e-25	2.76e-22	yes	up	_	_	_
c59301_g1	6.52	49.95	2.92	9.66e-25	4.08e-22	yes	up	_	_	_
c25737_g1	9.42	81.36	3.1	1.13e-24	4.7e-22	yes	up	K08910	LHCA4	path:ko00196
c65260_g1	1.68	16.13	3.19	1.36e-24	5.63e-22	yes	up	_	_	_
c41096_g1	39.28	179.99	2.19	1.94e-24	7.9e-22	yes	up	K08916	LHCB5	path:ko00196;path:ko01100
c64083_g2	20.3	121.49	2.58	2.4e-24	9.69e-22	yes	up	_	_	_
c108919_g1	27.53	199.39	2.85	3.19e-24	1.27e-21	yes	up	K19041	RNF38_44	_
c93999_g1	46.23	163.84	1.82	3.25e-24	1.28e-21	yes	up	K14454	GOT1	path:ko00220;path:ko00250;path:ko00270;path:ko00330;path:ko00350;path:ko00360;path:ko00400;path:ko00710;path:ko00950;path:ko00960;path:ko01100;path:ko01110;path:ko01120;path:ko01130;path:ko01200;path:ko01210;path:ko01230
c68091_g1	2.59	21.72	3.02	3.63e-24	1.42e-21	yes	up	K06892	F6H1	_
c59849_g1	63.59	8.47	-2.89	4.31e-24	1.67e-21	yes	down	K13051	iaaA, ASRGL1	_
c38702_g1	7.02	31.03	2.13	4.41e-24	1.69e-21	yes	up	K00797	speE, SRM	path:ko00270;path:ko00330;path:ko00410;path:ko00480;path:ko01100
c37550_g1	6.15	79.41	3.67	5.33e-24	2.02e-21	yes	up	_	_	_
c54251_g1	4.55	24.69	2.41	1.92e-23	7.21e-21	yes	up	K03327	TC.MATE, SLC47A, norM, mdtK, dinF	_
c69641_g1	6.86	35.54	2.36	2e-23	7.44e-21	yes	up	_	_	_
c69159_g1	1.25	10.56	2.99	2.25e-23	8.29e-21	yes	up	K03549	kup	_
c48624_g1	17.15	72.21	2.07	2.52e-23	9.18e-21	yes	up	_	_	_
c68381_g5	80.23	14.47	-2.46	3.44e-23	1.24e-20	yes	down	K15104	SLC25A11, OGC	_
c67351_g1	3951.37	563.72	-2.81	4.22e-23	1.51e-20	yes	down	_	_	_
c66303_g2	1.19	17.71	3.79	1.02e-22	3.61e-20	yes	up	K03921	DESA1	path:ko00061;path:ko01040;path:ko01212
c49803_g1	0.11	2.78	3.78	2.47e-22	8.68e-20	yes	up	_	_	_
c47531_g1	758.76	223.89	-1.76	2.79e-22	9.71e-20	yes	down	_	_	_
c71778_g6	59.49	25.73	-1.21	3.43e-22	1.18e-19	yes	down	_	_	_
c59524_g1	78.41	23.13	-1.76	3.53e-22	1.21e-19	yes	down	K00850	pfkA, PFK	path:ko00010;path:ko00030;path:ko00051;path:ko00052;path:ko00680;path:ko01100;path:ko01110;path:ko01120;path:ko01130;path:ko01200;path:ko01230;path:ko03018;path:ko04152;path:ko05230
c55108_g1	0.84	7.89	3.08	3.91e-22	1.32e-19	yes	up	_	_	_
c62868_g2	0.56	13.02	4.32	4.44e-22	1.49e-19	yes	up	K00799	GST, gst	path:ko00480;path:ko00980;path:ko00982;path:ko05204
c71429_g1	0.2	8.61	4.88	5.21e-22	1.73e-19	yes	up	_	_	_
c70022_g1	3.7	22	2.54	7.63e-22	2.51e-19	yes	up	K03403	chlH, bchH	path:ko00860;path:ko01100;path:ko01110
c94122_g1	6.27	57.57	3.18	8.33e-22	2.72e-19	yes	up	_	_	_
c59541_g1	0.02	3.7	5.04	9.3e-22	3.01e-19	yes	up	_	_	_
c30716_g1	4.08	37.68	3.18	1.03e-21	3.29e-19	yes	up	_	_	_
c38814_g1	14.02	90.95	2.69	1.14e-21	3.62e-19	yes	up	_	_	_
c68299_g1	0.02	2.47	4.38	1.92e-21	6.05e-19	yes	up	K05909	E1.10.3.2	_
c52586_g2	7.1	35.31	2.3	2.91e-21	9.09e-19	yes	up	K01762	ACS	path:ko00270;path:ko01100;path:ko01110
c63519_g2	186.16	815.99	2.13	3.56e-21	1.1e-18	yes	up	_	_	_
c65411_g2	2.1	17.14	2.97	3.83e-21	1.18e-18	yes	up	_	_	_
c55759_g1	0.4	9.42	4.26	4.37e-21	1.33e-18	yes	up	_	_	_
c70013_g1	24.9	251.9	3.33	5.6e-21	1.7e-18	yes	up	_	_	_
c56456_g1	21.37	3.42	-2.61	6.12e-21	1.84e-18	yes	down	K12125	ELF3	path:ko04712
c61843_g1	1.79	20.32	3.44	7.01e-21	2.09e-18	yes	up	_	_	_
c31744_g1	0.1	11.3	5.84	7.46e-21	2.2e-18	yes	up	_	_	_
c63366_g1	49.85	14.54	-1.77	9.18e-21	2.69e-18	yes	down	_	_	_
c61545_g4	3.72	31	3.02	1.37e-20	3.99e-18	yes	up	_	_	_
c70229_g3	19.02	70.7	1.89	1.42e-20	4.09e-18	yes	up	K09338	HD-ZIP	_
c108635_g1	25.6	92.1	1.84	1.78e-20	5.09e-18	yes	up	K03542	psbS	path:ko00195;path:ko01100
c58364_g2	0.21	7.11	4.54	2.25e-20	6.4e-18	yes	up	K00430	E1.11.1.7	path:ko00940;path:ko01100;path:ko01110
c58624_g1	0.01	2.6	4.64	2.57e-20	7.25e-18	yes	up	_	_	_
c58462_g1	49.73	13.53	-1.87	2.65e-20	7.43e-18	yes	down	K00430	E1.11.1.7	path:ko00940;path:ko01100;path:ko01110
c64461_g1	0.9	11.84	3.58	2.84e-20	7.91e-18	yes	up	K00422	E1.10.3.1	path:ko00350;path:ko00950;path:ko01100;path:ko01110
c79491_g1	7.58	78.83	3.36	3.06e-20	8.45e-18	yes	up	_	_	_
c63785_g2	3.55	37.49	3.36	5.34e-20	1.46e-17	yes	up	K05933	E1.14.17.4	path:ko00270;path:ko01100;path:ko01110
c22375_g1	273.62	70.53	-1.95	5.79e-20	1.57e-17	yes	down	_	_	_
c39444_g1	10.27	48.13	2.22	6.78e-20	1.83e-17	yes	up	_	_	_
c65651_g2	0.01	1.66	3.97	7.11e-20	1.91e-17	yes	up	K08472	MLO	_
c59358_g1	55.38	5.53	-3.3	8.68e-20	2.31e-17	yes	down	_	_	_
c20254_g2	5.26	24.02	2.17	8.81e-20	2.33e-17	yes	up	K17099	ANXA13	_
c12584_g1	70.98	15.66	-2.17	8.9e-20	2.34e-17	yes	down	K01580	E4.1.1.15, gadB, gadA, GAD	path:ko00250;path:ko00410;path:ko00430;path:ko00650;path:ko01100;path:ko01110;path:ko04727;path:ko04940
c27372_g2	2.13	15.42	2.8	9.67e-20	2.52e-17	yes	up	K00640	cysE	path:ko00270;path:ko00920;path:ko01100;path:ko01110;path:ko01120;path:ko01200;path:ko01230
c50255_g1	9743.28	870.24	-3.48	9.73e-20	2.52e-17	yes	down	_	_	_
c60252_g1	0.07	5.16	4.92	1.08e-19	2.77e-17	yes	up	_	_	_
c55100_g1	0.08	5.75	4.99	1.83e-19	4.67e-17	yes	up	_	_	_
c79523_g1	2.37	0.09	-3.71	2.01e-19	5.1e-17	yes	down	_	_	_
c95987_g1	0.15	20.53	6.37	2.07e-19	5.22e-17	yes	up	_	_	_
c71821_g2	8.25	35.13	2.08	2.12e-19	5.29e-17	yes	up	_	_	_
c69739_g1	0.12	7.29	5.08	2.88e-19	7.16e-17	yes	up	_	_	_
c65128_g1	8.96	62.55	2.79	3.31e-19	8.18e-17	yes	up	K00430	E1.11.1.7	path:ko00940;path:ko01100;path:ko01110
c74667_g1	16.65	1.11	-3.79	4.52e-19	1.11e-16	yes	down	_	_	_
c55605_g1	86.26	21.16	-2.02	4.66e-19	1.13e-16	yes	down	_	_	_
c63157_g3	62.72	193.33	1.62	5.98e-19	1.45e-16	yes	up	_	_	_
c38649_g1	0.18	7.02	4.64	7.82e-19	1.88e-16	yes	up	_	_	_
c69756_g1	9.8	40.17	2.02	8.41e-19	2.01e-16	yes	up	_	_	_
c38005_g1	10.19	52.92	2.36	9.51e-19	2.26e-16	yes	up	_	_	_
c66564_g1	3.54	20.32	2.49	1.23e-18	2.89e-16	yes	up	_	_	_
c52440_g1	13.44	68.72	2.35	1.27e-18	2.97e-16	yes	up	K16281	RHA1	_
c67117_g3	121.14	31.34	-1.95	1.81e-18	4.21e-16	yes	down	K14638	SLC15A3_4, PHT	_
c62414_g1	0.14	4.36	4.23	1.85e-18	4.29e-16	yes	up	_	_	_
c101678_g1	1.19	14.22	3.48	1.96e-18	4.52e-16	yes	up	_	_	_
c62460_g1	24.48	81.33	1.73	2.12e-18	4.85e-16	yes	up	_	_	_
c108692_g1	10.49	46.1	2.12	2.47e-18	5.61e-16	yes	up	_	_	_
c40554_g1	12.96	40.67	1.64	3.55e-18	8.02e-16	yes	up	_	_	_
c32058_g1	6.13	30.89	2.31	3.62e-18	8.13e-16	yes	up	_	_	_
c81560_g1	0.02	4.88	5.37	3.74e-18	8.35e-16	yes	up	_	_	_
c69813_g1	0.86	11.18	3.55	4.01e-18	8.91e-16	yes	up	_	_	_
c454_g1	52.08	8.72	-2.57	4.05e-18	8.94e-16	yes	down	K14638	SLC15A3_4, PHT	_
c18889_g1	14.17	53.08	1.9	4.38e-18	9.61e-16	yes	up	_	_	_
c87031_g1	1.32	0.01	-3.74	4.45e-18	9.7e-16	yes	down	_	_	_
c68422_g5	3.48	22.07	2.63	4.52e-18	9.8e-16	yes	up	_	_	_
c64811_g1	0.35	7.52	4.1	4.62e-18	9.97e-16	yes	up	K06966	K06966	_
c50954_g1	1.9	13.91	2.81	4.66e-18	9.99e-16	yes	up	K18881	DJ1D	path:ko00620;path:ko01120
c54884_g1	15.23	0.87	-3.99	5.69e-18	1.21e-15	yes	down	_	_	_
c67400_g1	0.85	8.28	3.14	5.86e-18	1.24e-15	yes	up	_	_	_
c65251_g3	15.46	48.71	1.65	5.9e-18	1.24e-15	yes	up	_	_	_
c70007_g3	3.48	0.04	-4.64	5.93e-18	1.24e-15	yes	down	_	_	_
c59433_g1	26.05	127.93	2.29	6.88e-18	1.43e-15	yes	up	K17609	NXN	_
c69961_g1	0.71	9.92	3.62	6.91e-18	1.43e-15	yes	up	_	_	_
c40366_g1	0.06	8.49	5.71	9.7e-18	2e-15	yes	up	K18491	ESX1	path:ko04550
c87800_g1	0.32	11.2	4.74	1.2e-17	2.45e-15	yes	up	_	_	_
c53639_g1	0.17	9.44	5.17	1.25e-17	2.54e-15	yes	up	_	_	_
c65884_g1	127.08	40.36	-1.65	1.34e-17	2.72e-15	yes	down	_	_	_
c38723_g1	20.5	75.14	1.87	1.37e-17	2.76e-15	yes	up	_	_	_
c65651_g1	5.55	20.57	1.87	1.39e-17	2.8e-15	yes	up	K08472	MLO	_
c71261_g3	2.09	0.03	-4.13	1.57e-17	3.12e-15	yes	down	_	_	_
c28341_g1	0.11	5.87	4.8	1.6e-17	3.17e-15	yes	up	_	_	_
c44885_g1	6.17	45.43	2.86	1.77e-17	3.5e-15	yes	up	_	_	_
c108786_g1	0.01	1.31	3.67	1.78e-17	3.5e-15	yes	up	K10529	DOX1	path:ko00592
c52350_g2	6.22	20.23	1.69	1.96e-17	3.82e-15	yes	up	_	_	_
c65722_g1	0.07	4.13	4.61	3.11e-17	6.05e-15	yes	up	_	_	_
c62374_g1	0.03	11.25	6.48	3.19e-17	6.17e-15	yes	up	K13082	DFR	path:ko00941;path:ko01100;path:ko01110
c64648_g1	38.11	138.24	1.86	3.33e-17	6.42e-15	yes	up	_	_	_
c47478_g1	4.75	22.2	2.2	3.8e-17	7.28e-15	yes	up	_	_	_
c67195_g3	0	3.04	4.97	3.84e-17	7.31e-15	yes	up	K01183	E3.2.1.14	path:ko00520;path:ko01100
c55637_g1	9.04	33.32	1.87	4.14e-17	7.84e-15	yes	up	_	_	_
c67009_g9	43.85	8.67	-2.32	4.33e-17	8.17e-15	yes	down	K09422	MYBP	_
c68790_g1	2.53	14.01	2.43	4.45e-17	8.35e-15	yes	up	_	_	_
c51302_g2	28.53	8.34	-1.76	4.58e-17	8.55e-15	yes	down	_	_	_
c56354_g2	14.51	49.74	1.77	4.85e-17	9.01e-15	yes	up	K09422	MYBP	_
c67038_g6	9.68	40.87	2.07	4.96e-17	9.17e-15	yes	up	_	_	_
c30695_g1	1.07	0	-3.55	5.07e-17	9.32e-15	yes	down	_	_	_
c60896_g1	0.41	5.74	3.52	5.41e-17	9.9e-15	yes	up	_	_	_
c23470_g1	19.1	53.73	1.49	6.38e-17	1.16e-14	yes	up	_	_	_
c67454_g1	5.63	29.48	2.37	6.67e-17	1.21e-14	yes	up	_	_	_
c109724_g1	1.51	12.61	2.98	7.03e-17	1.27e-14	yes	up	_	_	_
c71719_g4	12.97	56.46	2.11	7.09e-17	1.27e-14	yes	up	_	_	_
c68348_g1	0.06	2.41	3.98	7.16e-17	1.28e-14	yes	up	K10712	ADO	path:ko00430;path:ko01100
c102073_g1	17.69	0.76	-4.37	1.01e-16	1.79e-14	yes	down	K18819	GOLS	path:ko00052
c68741_g1	0.04	3.16	4.52	1.13e-16	2.01e-14	yes	up	_	_	_
c68380_g3	6.67	34.08	2.34	1.54e-16	2.71e-14	yes	up	_	_	_
c51872_g1	139.28	41.97	-1.73	1.58e-16	2.77e-14	yes	down	K01761	E4.4.1.11	path:ko00270;path:ko00450
c109049_g1	5.22	54.7	3.36	1.59e-16	2.77e-14	yes	up	_	_	_
c51826_g1	0	37.02	8.54	1.84e-16	3.2e-14	yes	up	_	_	_
c66318_g1	19.46	65.86	1.75	2.03e-16	3.51e-14	yes	up	_	_	_
c59393_g1	62.47	239.06	1.93	2.12e-16	3.65e-14	yes	up	K08915	LHCB4	path:ko00196;path:ko01100
c60998_g1	4.34	34.56	2.96	2.16e-16	3.69e-14	yes	up	_	_	_
c71237_g1	1.8	6.65	1.83	2.27e-16	3.88e-14	yes	up	K08081	TR1	path:ko00960;path:ko01100;path:ko01110
c30301_g1	0.04	34.78	7.99	2.75e-16	4.67e-14	yes	up	_	_	_
c59593_g1	8.24	25.33	1.61	3.02e-16	5.1e-14	yes	up	_	_	_
c49945_g3	5.54	0.09	-4.88	3.19e-16	5.36e-14	yes	down	_	_	_
c46497_g1	34.77	125.96	1.85	3.22e-16	5.39e-14	yes	up	_	_	_
c40889_g1	9.41	0.47	-4.06	3.44e-16	5.73e-14	yes	down	_	_	_
c67005_g1	8.7	32.72	1.9	3.48e-16	5.78e-14	yes	up	_	_	_
c60479_g2	10.96	69.7	2.66	3.64e-16	6.02e-14	yes	up	_	_	_
c65239_g1	9.09	42.95	2.23	3.67e-16	6.05e-14	yes	up	K09286	EREBP	_
c69289_g1	0.1	4.85	4.64	3.72e-16	6.1e-14	yes	up	_	_	_
c68978_g1	0.6	5.84	3.09	3.98e-16	6.49e-14	yes	up	_	_	_
c71017_g3	7.72	23	1.56	4.24e-16	6.88e-14	yes	up	K14509	ETR, ERS	path:ko04075
c71354_g3	49.21	131	1.41	4.37e-16	7.07e-14	yes	up	_	_	_
c53513_g1	21	4.64	-2.15	4.69e-16	7.56e-14	yes	down	K01466	allB	path:ko00230;path:ko01100;path:ko01120
c65033_g2	7.02	26.12	1.88	4.99e-16	8e-14	yes	up	K07735	algH	_
c58933_g1	4.8	28.53	2.55	5.66e-16	9.03e-14	yes	up	_	_	_
c52192_g1	20.49	56.7	1.46	5.98e-16	9.51e-14	yes	up	K01051	E3.1.1.11	path:ko00040;path:ko00500;path:ko01100
c66975_g4	0.37	7.43	4	7.06e-16	1.11e-13	yes	up	_	_	_
c70007_g2	12.11	3.72	-1.68	7.06e-16	1.11e-13	yes	down	K14638	SLC15A3_4, PHT	_
c63453_g1	26	2.75	-3.2	7.34e-16	1.15e-13	yes	down	_	_	_
c18920_g1	0.44	62.92	6.86	7.54e-16	1.18e-13	yes	up	_	_	_
c52429_g1	21.63	61.92	1.51	7.67e-16	1.19e-13	yes	up	_	_	_
c57890_g1	213.22	58.45	-1.87	7.72e-16	1.2e-13	yes	down	K01623	ALDO	path:ko00010;path:ko00030;path:ko00051;path:ko00680;path:ko00710;path:ko01100;path:ko01110;path:ko01120;path:ko01130;path:ko01200;path:ko01230
c68468_g5	0.08	1.71	3.32	8.94e-16	1.38e-13	yes	up	_	_	_
c71121_g1	13.22	35.02	1.4	8.95e-16	1.38e-13	yes	up	K17471	SULTR3	_
c68526_g1	2.91	11.02	1.88	9.37e-16	1.44e-13	yes	up	_	_	_
c29735_g2	0.11	3.45	4.07	1.01e-15	1.54e-13	yes	up	_	_	_
c71592_g2	7.47	21.97	1.54	1.14e-15	1.73e-13	yes	up	_	_	_
c55113_g1	33.68	136.25	2.01	1.17e-15	1.77e-13	yes	up	K08908	LHCA2	path:ko00196
c71218_g2	0.48	4.43	2.97	1.51e-15	2.27e-13	yes	up	K05658	ABCB1	path:ko02010;path:ko04976;path:ko05206
c94208_g1	158.13	23.68	-2.73	1.54e-15	2.31e-13	yes	down	_	_	_
c70440_g1	8.65	108.14	3.63	1.59e-15	2.38e-13	yes	up	K08912	LHCB1	path:ko00196;path:ko01100
c61529_g1	19.08	79.2	2.05	1.6e-15	2.38e-13	yes	up	_	_	_
c65049_g1	0	2.97	4.94	1.6e-15	2.38e-13	yes	up	_	_	_
c59594_g2	0.49	13.91	4.57	1.7e-15	2.51e-13	yes	up	K13449	PR1	path:ko04075;path:ko04626
c58378_g2	35.45	107.78	1.6	1.74e-15	2.56e-13	yes	up	K00799	GST, gst	path:ko00480;path:ko00980;path:ko00982;path:ko05204
c26396_g1	1.83	12.88	2.75	1.92e-15	2.81e-13	yes	up	K15398	CYP86A4S	path:ko00073;path:ko01100
c22305_g1	0.32	8.77	4.4	1.93e-15	2.82e-13	yes	up	_	_	_
c70362_g4	2.29	15.48	2.7	2.07e-15	3.01e-13	yes	up	_	_	_
c24850_g1	4.97	0.22	-3.98	2.31e-15	3.34e-13	yes	down	_	_	_
c55565_g2	0.02	2.3	4.35	2.56e-15	3.7e-13	yes	up	K10775	E4.3.1.24	path:ko00360;path:ko00940;path:ko01100;path:ko01110
c61767_g1	0.03	2.59	4.36	2.65e-15	3.81e-13	yes	up	_	_	_
c21579_g1	42.26	178.67	2.08	2.95e-15	4.23e-13	yes	up	_	_	_
c53080_g1	0	7.24	6.2	2.97e-15	4.23e-13	yes	up	_	_	_
c68502_g1	0.28	8.92	4.58	3e-15	4.27e-13	yes	up	_	_	_
c46880_g1	8.39	39.24	2.21	3.09e-15	4.38e-13	yes	up	_	_	_
c79707_g1	26.29	152.1	2.53	3.21e-15	4.53e-13	yes	up	_	_	_
c61950_g2	11.32	47.11	2.05	3.37e-15	4.74e-13	yes	up	_	_	_
c70684_g1	290.01	108.48	-1.42	3.7e-15	5.19e-13	yes	down	_	_	_
c68050_g2	37.56	113.28	1.59	3.97e-15	5.53e-13	yes	up	K14497	PP2C	path:ko04075;path:ko04931
c68884_g1	0.65	6.79	3.2	4.51e-15	6.27e-13	yes	up	_	_	_
c65745_g1	0.29	30.46	6.3	4.55e-15	6.31e-13	yes	up	_	_	_
c70911_g4	10	30.71	1.61	5.08e-15	7.01e-13	yes	up	_	_	_
c62728_g4	0.05	2.47	4.1	5.34e-15	7.35e-13	yes	up	_	_	_
c50129_g1	0.22	4.52	3.87	5.66e-15	7.75e-13	yes	up	_	_	_
c16931_g2	87.79	985.61	3.49	6e-15	8.18e-13	yes	up	_	_	_
c51659_g1	10.41	41.28	1.98	6.14e-15	8.34e-13	yes	up	K08360	CYB561	_
c72244_g1	37.35	101.69	1.44	6.27e-15	8.49e-13	yes	up	K04688	RPS6KB	path:ko04012;path:ko04066;path:ko04150;path:ko04151;path:ko04152;path:ko04211;path:ko04212;path:ko04213;path:ko04350;path:ko04666;path:ko04910;path:ko04931;path:ko05205;path:ko05221;path:ko05231
c53428_g1	0.01	4.66	5.48	6.77e-15	9.14e-13	yes	up	K13691	SGT1	_
c58888_g2	2.86	13.89	2.24	6.8e-15	9.15e-13	yes	up	_	_	_
c5663_g1	14.82	69.48	2.22	7e-15	9.39e-13	yes	up	_	_	_
c57539_g1	2.85	0.16	-3.49	7.27e-15	9.71e-13	yes	down	K01581	E4.1.1.17, ODC1, speC, speF	path:ko00330;path:ko00480;path:ko01100;path:ko01110;path:ko01130
c24578_g1	1.15	11.56	3.22	8.24e-15	1.1e-12	yes	up	_	_	_
c34943_g1	47.51	16.48	-1.52	8.34e-15	1.11e-12	yes	down	K05928	E2.1.1.95	path:ko00130;path:ko01100;path:ko01110
c66706_g5	3.33	18.29	2.42	1.04e-14	1.38e-12	yes	up	_	_	_
c55903_g1	17.11	53.63	1.64	1.11e-14	1.46e-12	yes	up	_	_	_
c45816_g1	39.58	1.02	-5.15	1.19e-14	1.56e-12	yes	down	_	_	_
c65672_g2	5.74	0.4	-3.56	1.3e-14	1.7e-12	yes	down	_	_	_
c70810_g1	0.14	3.87	4.07	1.33e-14	1.73e-12	yes	up	K15402	CYP86B1	path:ko00073
c71388_g4	8.5	28.5	1.73	1.36e-14	1.76e-12	yes	up	K00108	betA, CHDH	path:ko00260;path:ko01100
c67319_g1	1.63	13.58	2.98	1.38e-14	1.79e-12	yes	up	K13407	CYP94A1	path:ko00073
c63508_g1	35.04	99.35	1.5	1.71e-14	2.2e-12	yes	up	K17095	ANXA7_11	_
c58171_g1	0.31	14.68	5.17	1.73e-14	2.22e-12	yes	up	_	_	_
c70791_g3	120.26	356	1.56	1.82e-14	2.34e-12	yes	up	_	_	_
c61951_g3	12.34	2.06	-2.53	1.9e-14	2.43e-12	yes	down	_	_	_
c36822_g1	1.79	7.85	2.07	2.23e-14	2.83e-12	yes	up	K00016	LDH, ldh	path:ko00010;path:ko00270;path:ko00620;path:ko00640;path:ko01100;path:ko01110;path:ko01120;path:ko01130;path:ko04922
c16279_g1	76.37	29.18	-1.38	2.43e-14	3.08e-12	yes	down	K00700	glgB	path:ko00500;path:ko01100;path:ko01110
c8169_g1	61.89	16.38	-1.91	2.88e-14	3.64e-12	yes	down	K01859	E5.5.1.6	path:ko00941;path:ko01100;path:ko01110
c54689_g1	0.22	6.15	4.3	3.13e-14	3.94e-12	yes	up	_	_	_
c68069_g1	0.76	7.4	3.12	3.17e-14	3.97e-12	yes	up	_	_	_
c67553_g2	5.21	17.38	1.72	3.21e-14	4.02e-12	yes	up	K13495	CISZOG	path:ko00908
c52439_g1	5.81	0.23	-4.16	3.24e-14	4.04e-12	yes	down	_	_	_
c64589_g1	0.06	7.89	5.68	3.52e-14	4.37e-12	yes	up	_	_	_
c65193_g1	21.16	3.83	-2.44	3.95e-14	4.89e-12	yes	down	K00588	E2.1.1.104	path:ko00360;path:ko00940;path:ko00941;path:ko00945;path:ko01100;path:ko01110
c61346_g1	18.89	55.29	1.54	3.99e-14	4.92e-12	yes	up	K01184	E3.2.1.15	path:ko00040;path:ko00500;path:ko01100
c56051_g2	13.91	61.42	2.14	4.11e-14	5.06e-12	yes	up	_	_	_
c62945_g1	0.01	1.49	3.82	4.25e-14	5.21e-12	yes	up	_	_	_
c50117_g3	1.2	0.03	-3.32	4.4e-14	5.38e-12	yes	down	_	_	_
c52518_g1	137.83	39.2	-1.81	4.41e-14	5.38e-12	yes	down	K14486	K14486, ARF	path:ko04075
c71911_g2	22.36	10.19	-1.13	4.57e-14	5.56e-12	yes	down	_	_	_
c62737_g1	31.05	94.92	1.61	4.8e-14	5.81e-12	yes	up	K08901	psbQ	path:ko00195;path:ko01100
c15536_g1	13.56	96.5	2.82	5.27e-14	6.36e-12	yes	up	K08914	LHCB3	path:ko00196;path:ko01100
c71021_g1	3.68	11.46	1.61	5.39e-14	6.48e-12	yes	up	_	_	_
c57007_g1	0.21	4.83	4.01	5.71e-14	6.85e-12	yes	up	_	_	_
c69070_g8	13.22	89.53	2.75	6.13e-14	7.33e-12	yes	up	_	_	_
c68896_g1	2.21	10.06	2.14	6.21e-14	7.4e-12	yes	up	_	_	_
c66587_g1	1.3	5.74	2.07	6.51e-14	7.73e-12	yes	up	K01623	ALDO	path:ko00010;path:ko00030;path:ko00051;path:ko00680;path:ko00710;path:ko01100;path:ko01110;path:ko01120;path:ko01130;path:ko01200;path:ko01230
c68159_g1	0.34	3.48	3.03	6.71e-14	7.93e-12	yes	up	_	_	_
c49377_g1	5.04	19.05	1.9	6.72e-14	7.93e-12	yes	up	_	_	_
c66228_g1	7.21	21.96	1.59	7.39e-14	8.7e-12	yes	up	_	_	_
c101747_g1	0.09	2.58	3.79	7.6e-14	8.91e-12	yes	up	_	_	_
c60318_g4	1.73	15.11	3.05	8.68e-14	1.02e-11	yes	up	_	_	_
c38754_g1	0.71	62.23	6.26	8.79e-14	1.02e-11	yes	up	_	_	_
c61740_g1	18.61	50.89	1.45	9.35e-14	1.09e-11	yes	up	_	_	_
c62058_g1	0.48	14.35	4.64	9.4e-14	1.09e-11	yes	up	K06617	E2.4.1.82	path:ko00052
c57472_g2	7.22	29.08	2	9.42e-14	1.09e-11	yes	up	_	_	_
c38336_g1	3.8	18.52	2.26	9.45e-14	1.09e-11	yes	up	_	_	_
c71689_g1	6.64	19.86	1.57	9.65e-14	1.11e-11	yes	up	_	_	_
c16074_g1	73.02	239.95	1.71	1.04e-13	1.19e-11	yes	up	K01369	LGMN	path:ko04142;path:ko04612
c66501_g1	0.03	2.32	4.23	1.06e-13	1.21e-11	yes	up	K01514	PRUNE, PPX1	path:ko00230
c64880_g1	16.09	44.05	1.45	1.1e-13	1.25e-11	yes	up	_	_	_
c70475_g6	36.49	102.05	1.48	1.12e-13	1.27e-11	yes	up	_	_	_
c55043_g1	1.71	23.19	3.68	1.13e-13	1.27e-11	yes	up	_	_	_
c102391_g1	2.37	16.23	2.72	1.14e-13	1.29e-11	yes	up	_	_	_
c55368_g1	0.09	15.06	6.33	1.18e-13	1.32e-11	yes	up	_	_	_
c16482_g1	70.52	226.63	1.68	1.3e-13	1.46e-11	yes	up	K02695	psaH	path:ko00195;path:ko01100
c67834_g8	8.2	21.58	1.39	1.37e-13	1.53e-11	yes	up	_	_	_
c37776_g1	13.01	38.17	1.55	1.9e-13	2.11e-11	yes	up	K00472	E1.14.11.2	path:ko00330;path:ko01100
c1518_g1	14.31	66.25	2.2	2.05e-13	2.28e-11	yes	up	_	_	_
c69874_g1	1.56	10.02	2.61	2.09e-13	2.31e-11	yes	up	_	_	_
c54343_g1	59.83	184.69	1.62	2.31e-13	2.55e-11	yes	up	_	_	_
c62054_g1	0.82	8.27	3.18	2.39e-13	2.63e-11	yes	up	K01674	cah	path:ko00910
c44075_g1	0.03	1.99	4.04	2.74e-13	3.01e-11	yes	up	_	_	_
c67834_g11	81.95	203.12	1.31	2.83e-13	3.1e-11	yes	up	K07025	K07025	_
c55803_g1	67.38	26.03	-1.37	2.95e-13	3.22e-11	yes	down	K09680	coaW	path:ko00770;path:ko01100
c79656_g1	7.25	27.06	1.89	3.04e-13	3.3e-11	yes	up	_	_	_
c65672_g1	3.82	0.31	-3.26	3.1e-13	3.36e-11	yes	down	K03549	kup	_
c68934_g2	26.12	8.09	-1.68	3.75e-13	4.06e-11	yes	down	_	_	_
c48422_g1	677.85	1959.11	1.53	3.8e-13	4.1e-11	yes	up	_	_	_
c59945_g1	0.26	4.98	3.83	3.86e-13	4.15e-11	yes	up	K03327	TC.MATE, SLC47A, norM, mdtK, dinF	_
c66423_g2	2.81	51.87	4.16	3.87e-13	4.15e-11	yes	up	K08912	LHCB1	path:ko00196;path:ko01100
c59326_g1	3.52	0.32	-3.11	3.88e-13	4.15e-11	yes	down	_	_	_
c38650_g1	0.9	0.02	-3	3.97e-13	4.23e-11	yes	down	_	_	_
c65665_g4	4.37	25.44	2.52	4.59e-13	4.88e-11	yes	up	K06569	MFI2	_
c48150_g1	40.97	14.63	-1.48	5.19e-13	5.5e-11	yes	down	K15108	SLC25A19, DNC, TPC1	_
c66340_g1	50.91	126.59	1.31	5.3e-13	5.6e-11	yes	up	_	_	_
c1534_g1	96	261.4	1.44	5.37e-13	5.66e-11	yes	up	K02699	psaL	path:ko00195;path:ko01100
c62512_g2	0.72	8.63	3.41	5.5e-13	5.78e-11	yes	up	_	_	_
c69852_g3	7.19	2.59	-1.44	5.63e-13	5.9e-11	yes	down	_	_	_
c66542_g1	0.03	2.28	4.19	5.86e-13	6.13e-11	yes	up	_	_	_
c69232_g1	22.55	61.02	1.43	6.16e-13	6.42e-11	yes	up	K14432	ABF	path:ko04075
c51623_g1	14.5	52.49	1.85	6.58e-13	6.84e-11	yes	up	K08902	psb27	path:ko00195;path:ko01100
c68482_g1	3.61	12.41	1.75	6.73e-13	6.97e-11	yes	up	K08237	E2.4.1.218	_
c40717_g1	0.14	3.99	4.1	6.76e-13	6.99e-11	yes	up	_	_	_
c72050_g1	144.88	7.16	-4.32	6.87e-13	7.08e-11	yes	down	_	_	_
c65434_g1	6.18	75.57	3.59	7.18e-13	7.38e-11	yes	up	_	_	_
c51631_g1	3.68	24.37	2.69	8.09e-13	8.3e-11	yes	up	_	_	_
c57998_g1	0.66	5.86	2.98	9.19e-13	9.4e-11	yes	up	K01674	cah	path:ko00910
c53277_g1	71.92	231.92	1.69	9.42e-13	9.59e-11	yes	up	_	_	_
c16519_g1	42.51	132.84	1.64	9.44e-13	9.59e-11	yes	up	K02698	psaK	path:ko00195;path:ko01100
c50188_g3	0.01	1.88	4.12	9.46e-13	9.59e-11	yes	up	_	_	_
c64583_g2	3.57	14.35	1.98	9.69e-13	9.8e-11	yes	up	_	_	_
c45156_g1	1.47	8.41	2.44	9.95e-13	1e-10	yes	up	_	_	_
c69097_g1	69.39	205.21	1.56	1e-12	1.01e-10	yes	up	_	_	_
c38258_g1	0.29	4.06	3.42	1.09e-12	1.09e-10	yes	up	K08081	TR1	path:ko00960;path:ko01100;path:ko01110
c58574_g1	267.81	108.32	-1.31	1.1e-12	1.1e-10	yes	down	_	_	_
c63498_g5	0.14	2.22	3.26	1.12e-12	1.11e-10	yes	up	_	_	_
c65450_g2	10.82	30.47	1.49	1.13e-12	1.12e-10	yes	up	_	_	_
c49065_g1	22.72	83.71	1.88	1.49e-12	1.48e-10	yes	up	_	_	_
c65186_g2	4.97	0.51	-3.06	1.51e-12	1.5e-10	yes	down	K15382	SLC50A, SWEET	_
c50560_g1	13.49	33.46	1.3	1.53e-12	1.51e-10	yes	up	K00311	ETFDH	_
c9000_g1	2.29	11.93	2.33	1.66e-12	1.64e-10	yes	up	_	_	_
c61714_g1	4.37	14.48	1.71	1.73e-12	1.7e-10	yes	up	K01620	ltaE	path:ko00260;path:ko01100;path:ko01110;path:ko01120;path:ko01130;path:ko01230
c8326_g1	44.98	178.49	1.99	1.76e-12	1.73e-10	yes	up	_	_	_
c16609_g1	0.82	15.07	4.05	1.77e-12	1.73e-10	yes	up	_	_	_
c67604_g2	8.1	21.23	1.38	1.9e-12	1.85e-10	yes	up	_	_	_
c71729_g6	8.17	1.24	-2.63	2.15e-12	2.09e-10	yes	down	_	_	_
c70601_g1	26.95	81.61	1.59	2.2e-12	2.14e-10	yes	up	K02694	psaF	path:ko00195;path:ko01100
c49068_g2	143.4	340.16	1.25	2.36e-12	2.29e-10	yes	up	K09872	PIP	_
c71894_g1	7.92	15.49	0.96	2.63e-12	2.53e-10	no	up	_	_	_
c68043_g1	2.79	12.66	2.14	2.75e-12	2.65e-10	yes	up	K13066	E2.1.1.68, COMT	path:ko00940;path:ko01100;path:ko01110
c49332_g1	205.07	85.22	-1.27	2.78e-12	2.67e-10	yes	down	K02639	petF	path:ko00195
c55106_g1	6.52	31.86	2.27	2.82e-12	2.7e-10	yes	up	_	_	_
c43029_g1	0.04	3.32	4.59	2.92e-12	2.79e-10	yes	up	_	_	_
c65131_g2	63.61	28.29	-1.17	3.03e-12	2.89e-10	yes	down	_	_	_
c57620_g1	23.76	75.63	1.67	3.3e-12	3.14e-10	yes	up	_	_	_
c57752_g3	0.18	6.31	4.53	3.42e-12	3.24e-10	yes	up	K09422	MYBP	_
c70185_g2	11.24	34.39	1.6	3.43e-12	3.24e-10	yes	up	K16055	TPS	path:ko00500;path:ko01100
c59181_g1	0.01	4.11	5.24	3.55e-12	3.35e-10	yes	up	K08235	E2.4.1.207	_
c68539_g1	24.55	62.34	1.34	3.59e-12	3.38e-10	yes	up	K01915	glnA, GLUL	path:ko00220;path:ko00250;path:ko00630;path:ko00910;path:ko01100;path:ko01120;path:ko01230;path:ko02020;path:ko04724;path:ko04727
c12212_g1	121.65	51.36	-1.24	3.67e-12	3.44e-10	yes	down	K00940	ndk, NME	path:ko00230;path:ko00240;path:ko01100;path:ko01110;path:ko01130
c64838_g1	1.07	5.47	2.25	3.73e-12	3.49e-10	yes	up	K08867	WNK, PRKWNK	_
c71128_g5	0.05	2.74	4.23	3.85e-12	3.59e-10	yes	up	_	_	_
c47427_g2	0.77	9.31	3.44	4.04e-12	3.76e-10	yes	up	K00430	E1.11.1.7	path:ko00940;path:ko01100;path:ko01110
c56457_g1	0.02	2.63	4.48	4.05e-12	3.77e-10	yes	up	_	_	_
c70947_g3	3.33	10.61	1.64	4.29e-12	3.97e-10	yes	up	_	_	_
c65880_g1	0.04	4.26	5.01	4.34e-12	4.01e-10	yes	up	_	_	_
c70803_g3	1.47	24.98	4	4.44e-12	4.09e-10	yes	up	_	_	_
c30315_g3	2.77	14.82	2.38	4.54e-12	4.17e-10	yes	up	K14638	SLC15A3_4, PHT	_
c66537_g1	0.4	3.54	2.87	4.73e-12	4.34e-10	yes	up	_	_	_
c50932_g1	466.25	1745.01	1.9	4.76e-12	4.35e-10	yes	up	K08912	LHCB1	path:ko00196;path:ko01100
c23523_g1	14.59	38.35	1.39	4.82e-12	4.4e-10	yes	up	_	_	_
c70608_g1	14.09	3.08	-2.16	5e-12	4.55e-10	yes	down	K12638	CYP90D1	path:ko00905;path:ko01100;path:ko01110
c9098_g2	8.53	35.3	2.04	5.03e-12	4.57e-10	yes	up	_	_	_
c68291_g1	18.08	127.8	2.81	5.11e-12	4.63e-10	yes	up	_	_	_
c70147_g16	0.1	1.99	3.4	5.13e-12	4.64e-10	yes	up	_	_	_
c71611_g5	7.49	21.82	1.53	5.34e-12	4.82e-10	yes	up	K07198	PRKAA, AMPK	path:ko04068;path:ko04140;path:ko04150;path:ko04151;path:ko04152;path:ko04211;path:ko04213;path:ko04710;path:ko04910;path:ko04920;path:ko04921;path:ko04922;path:ko04931;path:ko04932;path:ko05410
c71588_g1	0.83	3.96	2.13	5.56e-12	4.99e-10	yes	up	_	_	_
c65802_g1	0.09	3.73	4.3	5.56e-12	4.99e-10	yes	up	K03327	TC.MATE, SLC47A, norM, mdtK, dinF	_
c47770_g1	26.99	74.11	1.45	5.64e-12	5.05e-10	yes	up	_	_	_
c91637_g1	0.71	11.83	3.89	5.96e-12	5.33e-10	yes	up	_	_	_
c62299_g1	1.93	8.94	2.16	6.14e-12	5.48e-10	yes	up	_	_	_
c55334_g2	9.63	25.29	1.38	6.22e-12	5.53e-10	yes	up	_	_	_
c52849_g1	13.35	34.5	1.36	6.49e-12	5.75e-10	yes	up	K14484	IAA	path:ko04075
c66927_g7	5.3	19.58	1.87	6.7e-12	5.93e-10	yes	up	_	_	_
c66864_g4	15.08	39.8	1.39	6.98e-12	6.16e-10	yes	up	K00703	E2.4.1.21, glgA	path:ko00500;path:ko01100;path:ko01110
c28908_g1	230.65	101.82	-1.18	7.17e-12	6.3e-10	yes	down	K03301	TC.AAA	_
c64589_g2	0	6.91	6.13	7.17e-12	6.3e-10	yes	up	_	_	_
c29735_g1	0.13	4.78	4.43	7.51e-12	6.58e-10	yes	up	_	_	_
c68422_g1	1.83	14.48	2.91	7.85e-12	6.86e-10	yes	up	_	_	_
c27228_g1	0.07	3.29	4.32	7.86e-12	6.86e-10	yes	up	_	_	_
c63852_g1	5.67	23.02	2	8.25e-12	7.19e-10	yes	up	_	_	_
c53671_g1	2.2	11	2.27	8.96e-12	7.78e-10	yes	up	_	_	_
c46607_g1	0.23	4.78	3.9	9.35e-12	8.1e-10	yes	up	_	_	_
c61490_g1	0.11	2.08	3.41	9.49e-12	8.21e-10	yes	up	K01762	ACS	path:ko00270;path:ko01100;path:ko01110
c67522_g1	0.25	3.39	3.32	9.82e-12	8.47e-10	yes	up	_	_	_
c65896_g1	3.48	19.76	2.47	1.05e-11	9e-10	yes	up	K12761	SNF1	path:ko04113
c69710_g1	8.19	22.9	1.47	1.06e-11	9.06e-10	yes	up	K03327	TC.MATE, SLC47A, norM, mdtK, dinF	_
c51506_g1	5.83	18.56	1.65	1.12e-11	9.64e-10	yes	up	_	_	_
c69160_g5	8.61	1.08	-2.88	1.13e-11	9.67e-10	yes	down	K16903	TAA1	path:ko00380;path:ko01100
c65199_g1	24.25	8.12	-1.57	1.14e-11	9.74e-10	yes	down	_	_	_
c4659_g1	0.16	2.85	3.52	1.19e-11	1.01e-09	yes	up	_	_	_
c64206_g1	13.07	57.19	2.12	1.28e-11	1.09e-09	yes	up	_	_	_
c108634_g1	9.93	34.24	1.78	1.28e-11	1.09e-09	yes	up	_	_	_
c101303_g1	22.81	2.23	-3.3	1.34e-11	1.14e-09	yes	down	_	_	_
c57071_g2	18.35	60.33	1.71	1.42e-11	1.19e-09	yes	up	K13066	E2.1.1.68, COMT	path:ko00940;path:ko01100;path:ko01110
c50927_g2	35.99	82.11	1.19	1.45e-11	1.22e-09	yes	up	_	_	_
c50815_g1	0.01	1.41	3.73	1.52e-11	1.28e-09	yes	up	_	_	_
c28843_g1	40.63	95.76	1.23	1.55e-11	1.3e-09	yes	up	K14156	CHK	path:ko00564;path:ko01100;path:ko05231
c67162_g1	7.33	0.74	-3.14	1.55e-11	1.3e-09	yes	down	_	_	_
c70547_g2	1.1	7.07	2.58	1.57e-11	1.31e-09	yes	up	_	_	_
c23469_g1	46.56	18.56	-1.32	1.59e-11	1.32e-09	yes	down	_	_	_
c44028_g1	0	2.15	4.49	1.6e-11	1.33e-09	yes	up	_	_	_
c39750_g2	3.54	33.45	3.2	1.68e-11	1.39e-09	yes	up	K15404	K15404, CER1	path:ko00073;path:ko01110
c72258_g1	44.4	4.6	-3.24	1.69e-11	1.39e-09	yes	down	K05278	FLS	path:ko00941;path:ko01100;path:ko01110
c52341_g1	0.36	5.74	3.67	1.71e-11	1.41e-09	yes	up	K14638	SLC15A3_4, PHT	_
c70783_g1	249.19	623.07	1.32	1.73e-11	1.43e-09	yes	up	K01177	E3.2.1.2	path:ko00500;path:ko01100
c34149_g1	203.14	8.43	-4.57	1.86e-11	1.53e-09	yes	down	_	_	_
c40343_g1	214.22	540.93	1.34	1.99e-11	1.63e-09	yes	up	K03541	psbR	path:ko00195;path:ko01100
c69517_g1	3.2	0.53	-2.38	2.07e-11	1.69e-09	yes	down	_	_	_
c57222_g1	0.74	6.54	2.98	2.07e-11	1.69e-09	yes	up	_	_	_
c66580_g1	11.17	27.18	1.28	2.18e-11	1.77e-09	yes	up	K03696	clpC	_
c62246_g3	135.47	55.01	-1.3	2.2e-11	1.79e-09	yes	down	_	_	_
c67019_g1	4.48	14.77	1.7	2.23e-11	1.81e-09	yes	up	_	_	_
c55416_g1	18.31	48.22	1.39	2.26e-11	1.83e-09	yes	up	K07466	RFA1, RPA1, rpa	path:ko03030;path:ko03420;path:ko03430;path:ko03440;path:ko03460
c58502_g5	0.86	7.87	3.06	2.28e-11	1.84e-09	yes	up	_	_	_
c69758_g2	0.11	11.12	5.76	2.3e-11	1.85e-09	yes	up	_	_	_
c71325_g1	0.1	1.18	2.66	2.41e-11	1.94e-09	yes	up	_	_	_
c49729_g1	0.88	10.5	3.43	2.45e-11	1.96e-09	yes	up	K14497	PP2C	path:ko04075;path:ko04931
c62717_g1	352.55	142.96	-1.3	2.5e-11	2e-09	yes	down	_	_	_
c69678_g2	0.52	6	3.3	2.55e-11	2.03e-09	yes	up	_	_	_
c56524_g1	11.81	2.86	-2.01	2.64e-11	2.1e-09	yes	down	_	_	_
c28767_g1	9.59	25.57	1.41	2.69e-11	2.14e-09	yes	up	K00131	gapN	path:ko00010;path:ko00030;path:ko01100;path:ko01120;path:ko01200
c53541_g2	14.54	2.26	-2.63	2.73e-11	2.17e-09	yes	down	_	_	_
c58487_g1	68.83	29.45	-1.22	2.83e-11	2.24e-09	yes	down	K00939	adk, AK	path:ko00230;path:ko01100;path:ko01110;path:ko01130
c54271_g1	4.15	14.82	1.81	2.93e-11	2.31e-09	yes	up	_	_	_
c34836_g1	393.92	118.41	-1.73	3e-11	2.36e-09	yes	down	_	_	_
c66741_g1	9.4	45.9	2.28	3.18e-11	2.5e-09	yes	up	K17616	CTDSPL2	_
c41257_g2	2.2	16	2.81	3.23e-11	2.54e-09	yes	up	_	_	_
c90997_g1	4.91	0	-5.65	3.32e-11	2.6e-09	yes	down	_	_	_
c58097_g1	1.53	0.05	-3.48	3.33e-11	2.61e-09	yes	down	_	_	_
c69846_g1	0.04	1.01	2.95	3.39e-11	2.65e-09	yes	up	_	_	_
c69967_g1	65.5	206.8	1.66	3.41e-11	2.65e-09	yes	up	K06617	E2.4.1.82	path:ko00052
c70002_g4	0.77	8.71	3.34	3.42e-11	2.66e-09	yes	up	_	_	_
c49680_g2	0.03	1.24	3.34	3.54e-11	2.75e-09	yes	up	_	_	_
c66193_g1	20.79	47.32	1.18	3.59e-11	2.78e-09	yes	up	K00253	IVD, ivd	path:ko00280;path:ko01100
c59906_g1	3.96	12.71	1.66	3.6e-11	2.78e-09	yes	up	_	_	_
c63727_g1	9.59	28.76	1.58	3.74e-11	2.88e-09	yes	up	K00799	GST, gst	path:ko00480;path:ko00980;path:ko00982;path:ko05204
c39605_g1	22.01	3.2	-2.75	3.92e-11	3.01e-09	yes	down	_	_	_
c68338_g1	3.81	14.88	1.94	3.99e-11	3.07e-09	yes	up	K01285	PRCP	path:ko04614;path:ko04974
c66506_g3	1.26	5.78	2.11	4.41e-11	3.38e-09	yes	up	K14486	K14486, ARF	path:ko04075
c50879_g1	2.7	0.13	-3.61	4.59e-11	3.51e-09	yes	down	_	_	_
c28855_g1	91.48	215.46	1.24	4.82e-11	3.68e-09	yes	up	K00008	SORD, gutB	path:ko00040;path:ko00051;path:ko01100
c59718_g1	3.79	0.39	-2.99	4.9e-11	3.73e-09	yes	down	_	_	_
c18972_g1	79.05	190	1.26	5e-11	3.8e-09	yes	up	K00695	E2.4.1.13	path:ko00500;path:ko01100
c71583_g2	26.19	45.37	0.79	5.15e-11	3.91e-09	no	up	K05666	ABCC2	path:ko02010;path:ko04976
c70348_g1	35.9	85.33	1.25	5.29e-11	4e-09	yes	up	_	_	_
c60540_g1	22.39	52.95	1.24	5.3e-11	4e-09	yes	up	_	_	_
c65768_g1	0.23	3.59	3.48	5.98e-11	4.51e-09	yes	up	_	_	_
c49945_g1	3.28	0.03	-4.74	6.04e-11	4.54e-09	yes	down	_	_	_
c66928_g1	14.8	33.29	1.16	6.33e-11	4.75e-09	yes	up	_	_	_
c101388_g1	3.93	0.48	-2.79	6.37e-11	4.77e-09	yes	down	_	_	_
c17240_g1	28.01	71	1.34	6.4e-11	4.79e-09	yes	up	_	_	_
c50705_g1	5.33	19.12	1.82	6.43e-11	4.8e-09	yes	up	_	_	_
c60282_g2	0.98	11.04	3.37	6.52e-11	4.86e-09	yes	up	_	_	_
c69064_g2	18.56	43.45	1.22	6.69e-11	4.97e-09	yes	up	_	_	_
c72885_g1	0.28	4.12	3.46	6.83e-11	5.07e-09	yes	up	_	_	_
c94058_g1	13.71	59.3	2.1	6.94e-11	5.13e-09	yes	up	K03671	trxA	_
c31632_g1	2.1	0.02	-4.14	7.05e-11	5.21e-09	yes	down	K13449	PR1	path:ko04075;path:ko04626
c36724_g1	11.05	30.13	1.44	7.11e-11	5.24e-09	yes	up	_	_	_
c59468_g2	0.04	10.87	6.26	7.14e-11	5.26e-09	yes	up	_	_	_
c60112_g1	0.07	1.41	3.18	7.18e-11	5.28e-09	yes	up	_	_	_
c67135_g1	5.59	19.8	1.81	7.32e-11	5.36e-09	yes	up	K18649	IMPL2	path:ko00053;path:ko00340;path:ko00562;path:ko01100;path:ko01110;path:ko01230;path:ko04070
c47753_g1	14.5	50.63	1.8	7.68e-11	5.62e-09	yes	up	_	_	_
c60638_g1	0.29	3	2.97	7.87e-11	5.75e-09	yes	up	_	_	_
c68402_g3	4.66	15.58	1.72	8.27e-11	6.03e-09	yes	up	_	_	_
c26586_g1	0.39	3.74	2.96	8.41e-11	6.12e-09	yes	up	_	_	_
c18867_g1	1.59	0.04	-3.55	8.54e-11	6.2e-09	yes	down	_	_	_
c65008_g1	17.7	4.99	-1.81	8.55e-11	6.2e-09	yes	down	_	_	_
c101723_g1	17.56	6.14	-1.5	8.65e-11	6.26e-09	yes	down	K15283	SLC35E1	_
c62070_g1	1.11	8.86	2.89	8.79e-11	6.35e-09	yes	up	K00430	E1.11.1.7	path:ko00940;path:ko01100;path:ko01110
c56115_g1	113.42	51.07	-1.15	8.82e-11	6.35e-09	yes	down	_	_	_
c62142_g3	10.26	27.39	1.41	9.01e-11	6.46e-09	yes	up	_	_	_
c66666_g1	17.1	45.28	1.4	9.01e-11	6.46e-09	yes	up	_	_	_
c32601_g1	4.96	0.28	-3.73	9.14e-11	6.54e-09	yes	down	_	_	_
c65475_g1	0.41	3.57	2.84	9.48e-11	6.78e-09	yes	up	_	_	_
c71219_g1	1.08	7.86	2.76	9.55e-11	6.81e-09	yes	up	K00876	udk, UCK	path:ko00240;path:ko00983;path:ko01100
c54763_g1	0	1.1	3.58	1.01e-10	7.16e-09	yes	up	_	_	_
c45156_g2	0.88	6.61	2.78	1.06e-10	7.53e-09	yes	up	_	_	_
c60871_g1	1.74	8.96	2.3	1.1e-10	7.81e-09	yes	up	_	_	_
c109265_g1	2.66	18.07	2.72	1.13e-10	8.02e-09	yes	up	_	_	_
c71408_g1	30.82	67.28	1.12	1.19e-10	8.37e-09	yes	up	K14497	PP2C	path:ko04075;path:ko04931
c60098_g1	1.36	6.74	2.23	1.19e-10	8.37e-09	yes	up	_	_	_
c55130_g1	0.01	1.15	3.47	1.2e-10	8.42e-09	yes	up	_	_	_
c4587_g1	0.74	7.56	3.19	1.25e-10	8.77e-09	yes	up	_	_	_
c69524_g1	0.08	1.69	3.32	1.28e-10	8.96e-09	yes	up	_	_	_
c54742_g1	41.08	16.18	-1.34	1.29e-10	9.01e-09	yes	down	_	_	_
c67226_g1	0.24	3.19	3.29	1.36e-10	9.52e-09	yes	up	_	_	_
c41524_g1	0.26	2.31	2.76	1.37e-10	9.58e-09	yes	up	K13691	SGT1	_
c101426_g1	7.68	27.47	1.83	1.4e-10	9.78e-09	yes	up	K01193	E3.2.1.26, sacA	path:ko00052;path:ko00500;path:ko01100
c10870_g1	0.06	2.8	4.16	1.45e-10	1.01e-08	yes	up	_	_	_
c80207_g1	67.83	170.73	1.33	1.47e-10	1.02e-08	yes	up	K08905	psaG	path:ko00195;path:ko01100
c69877_g1	0.03	1.34	3.5	1.58e-10	1.09e-08	yes	up	_	_	_
c62050_g1	0.11	3.53	4.11	1.59e-10	1.1e-08	yes	up	K15397	KCS	path:ko00062;path:ko01110
c70100_g1	8.52	21.04	1.3	1.62e-10	1.12e-08	yes	up	K09838	ZEP, ABA1	path:ko00906;path:ko01100;path:ko01110
c21660_g2	10.63	28.97	1.44	1.64e-10	1.13e-08	yes	up	_	_	_
c22118_g1	11.61	48.56	2.06	1.66e-10	1.14e-08	yes	up	K08901	psbQ	path:ko00195;path:ko01100
c63638_g2	0.24	2.7	3.06	1.71e-10	1.17e-08	yes	up	_	_	_
c64690_g1	71.53	201.5	1.49	1.72e-10	1.18e-08	yes	up	K09286	EREBP	_
c66995_g5	60.34	143.17	1.25	1.72e-10	1.18e-08	yes	up	K12657	ALDH18A1, P5CS	path:ko00330;path:ko01100;path:ko01110;path:ko01230
c49760_g1	0.41	6.69	3.74	1.77e-10	1.21e-08	yes	up	_	_	_
c71633_g1	3.74	9.66	1.35	1.82e-10	1.24e-08	yes	up	_	_	_
c57752_g1	0.29	4.36	3.52	1.87e-10	1.27e-08	yes	up	K09422	MYBP	_
c71606_g2	16.6	41.55	1.32	1.9e-10	1.29e-08	yes	up	K15718	LOX1_5	path:ko00591
c50188_g1	0	1.49	3.99	1.94e-10	1.31e-08	yes	up	_	_	_
c54973_g1	2.28	7.82	1.73	1.97e-10	1.33e-08	yes	up	K12640	CYP85A2, BR6OX2	path:ko00905;path:ko01100;path:ko01110
c61711_g2	8.42	23.56	1.47	1.99e-10	1.35e-08	yes	up	_	_	_
c68437_g1	12.43	39.24	1.65	2e-10	1.35e-08	yes	up	K14803	PTC2_3	_
c68432_g1	16.69	57.37	1.78	2.07e-10	1.39e-08	yes	up	_	_	_
c67437_g2	18.67	41.13	1.14	2.08e-10	1.4e-08	yes	up	_	_	_
c49278_g1	1.86	8.29	2.1	2.14e-10	1.44e-08	yes	up	K08245	E3.4.23.40	_
c67301_g1	18.85	42.45	1.17	2.15e-10	1.44e-08	yes	up	_	_	_
c56159_g1	0.27	2.97	3.05	2.17e-10	1.45e-08	yes	up	_	_	_
c70519_g1	0.04	2.46	4.17	2.19e-10	1.46e-08	yes	up	K00962	pnp, PNPT1	path:ko00230;path:ko00240;path:ko03018
c68468_g3	0.85	6.49	2.79	2.19e-10	1.46e-08	yes	up	_	_	_
c57666_g2	0.1	1.31	2.84	2.2e-10	1.46e-08	yes	up	_	_	_
c18963_g1	19.92	51.67	1.37	2.2e-10	1.46e-08	yes	up	K08332	VAC8	path:ko04140
c28841_g1	26.21	76.77	1.55	2.22e-10	1.47e-08	yes	up	K17506	PPM1L, PP2CE	_
c32808_g1	3.06	16.04	2.35	2.35e-10	1.55e-08	yes	up	K14488	SAUR	path:ko04075
c71208_g1	4.6	12.59	1.43	2.4e-10	1.59e-08	yes	up	_	_	_
c26580_g1	0	0.87	3.28	2.52e-10	1.66e-08	yes	up	_	_	_
c4859_g2	7.28	1.2	-2.51	2.84e-10	1.87e-08	yes	down	K00430	E1.11.1.7	path:ko00940;path:ko01100;path:ko01110
c52726_g1	3.37	11.9	1.79	2.9e-10	1.9e-08	yes	up	K01087	otsB	path:ko00500;path:ko01100
c64888_g1	1.46	6.28	2.03	2.97e-10	1.95e-08	yes	up	_	_	_
c71136_g1	0.02	5.3	5.46	3.01e-10	1.97e-08	yes	up	_	_	_
c62088_g1	1.37	9.62	2.72	3.05e-10	1.99e-08	yes	up	K14709	SLC39A1_2_3, ZIP1_2_3	_
c52775_g2	0.51	4.55	2.92	3.15e-10	2.05e-08	yes	up	_	_	_
c94104_g1	8.44	1.97	-2.05	3.2e-10	2.08e-08	yes	down	_	_	_
c53952_g1	393.37	837.05	1.09	3.22e-10	2.09e-08	yes	up	K09872	PIP	_
c67038_g5	1.04	6.89	2.62	3.35e-10	2.17e-08	yes	up	_	_	_
c65878_g1	13.08	53.38	2.02	3.36e-10	2.17e-08	yes	up	K01304	E3.4.19.3, pcp	_
c69830_g2	2.29	0.15	-3.23	3.53e-10	2.28e-08	yes	down	_	_	_
c68686_g1	19.85	52.35	1.39	3.54e-10	2.29e-08	yes	up	K05857	PLCD	path:ko00562;path:ko01100;path:ko04020;path:ko04070;path:ko04919;path:ko04933
c35054_g1	5.47	21.38	1.95	4.02e-10	2.59e-08	yes	up	_	_	_
c69776_g1	0.63	3.67	2.38	4.06e-10	2.61e-08	yes	up	_	_	_
c61246_g1	0.75	0	-3.1	4.2e-10	2.69e-08	yes	down	_	_	_
c68070_g2	2.84	46.78	4	4.26e-10	2.73e-08	yes	up	K16292	CEP, CYSEP	_
c44543_g1	24.02	6.94	-1.78	4.27e-10	2.73e-08	yes	down	_	_	_
c32362_g1	0.05	2.09	3.88	4.33e-10	2.76e-08	yes	up	K08912	LHCB1	path:ko00196;path:ko01100
c16194_g1	57.37	141.64	1.3	4.4e-10	2.8e-08	yes	up	_	_	_
c52649_g1	1.38	10.48	2.84	4.54e-10	2.89e-08	yes	up	K17609	NXN	_
c16404_g1	13.85	1.69	-2.97	4.58e-10	2.91e-08	yes	down	_	_	_
c30245_g1	3.25	12.76	1.94	4.61e-10	2.92e-08	yes	up	_	_	_
c70258_g1	1.94	9.72	2.26	4.61e-10	2.92e-08	yes	up	K14487	GH3	path:ko04075
c54774_g1	0.01	1.49	3.85	4.73e-10	2.99e-08	yes	up	_	_	_
c35716_g1	0	1.58	4.07	5.09e-10	3.21e-08	yes	up	_	_	_
c46699_g1	0.89	0.05	-2.76	5.4e-10	3.4e-08	yes	down	_	_	_
c68305_g3	4.83	0.23	-3.91	5.41e-10	3.4e-08	yes	down	_	_	_
c69031_g1	1.23	5.44	2.06	5.44e-10	3.41e-08	yes	up	_	_	_
c94523_g2	12.26	2.63	-2.18	5.48e-10	3.44e-08	yes	down	_	_	_
c66867_g3	93.74	40.65	-1.2	5.5e-10	3.44e-08	yes	down	K00658	DLST, sucB	path:ko00020;path:ko00310;path:ko01100;path:ko01110;path:ko01120;path:ko01130;path:ko01200
c59682_g1	45.55	25.43	-0.84	5.54e-10	3.46e-08	no	down	_	_	_
c57565_g1	57.77	26.66	-1.11	5.61e-10	3.5e-08	yes	down	K11593	ELF2C, AGO	_
c57497_g1	0.13	1.83	3.06	5.67e-10	3.53e-08	yes	up	_	_	_
c67632_g1	1.82	7.44	1.97	5.74e-10	3.57e-08	yes	up	K03327	TC.MATE, SLC47A, norM, mdtK, dinF	_
c63727_g3	7.91	31.71	1.99	5.9e-10	3.66e-08	yes	up	_	_	_
c56858_g1	44.56	155.8	1.8	5.93e-10	3.67e-08	yes	up	K08909	LHCA3	path:ko00196
c71749_g3	2.64	11.71	2.11	6.08e-10	3.76e-08	yes	up	K13407	CYP94A1	path:ko00073
c41998_g1	0.04	1.35	3.39	6.23e-10	3.85e-08	yes	up	K11658	BAZ1B, WSTF	_
c61171_g1	2.44	12.09	2.26	6.3e-10	3.88e-08	yes	up	K07025	K07025	_
c70404_g5	0.27	7.53	4.37	6.36e-10	3.91e-08	yes	up	_	_	_
c12738_g1	113.24	46	-1.3	6.42e-10	3.95e-08	yes	down	K08762	DBI, ACBP	path:ko03320
c66538_g1	8.26	19.3	1.21	6.63e-10	4.06e-08	yes	up	_	_	_
c70928_g3	167.65	16.47	-3.34	6.66e-10	4.08e-08	yes	down	_	_	_
c66995_g2	43.97	90.73	1.04	6.79e-10	4.15e-08	yes	up	_	_	_
c71561_g2	0.95	11.91	3.51	6.82e-10	4.16e-08	yes	up	_	_	_
c23708_g1	0.01	1.22	3.54	6.88e-10	4.19e-08	yes	up	_	_	_
c62703_g3	0.07	2.15	3.7	6.98e-10	4.25e-08	yes	up	_	_	_
c63727_g2	3.28	27.28	3.02	7.18e-10	4.36e-08	yes	up	K00799	GST, gst	path:ko00480;path:ko00980;path:ko00982;path:ko05204
c68824_g1	13	4.5	-1.51	7.38e-10	4.48e-08	yes	down	_	_	_
c71368_g1	0.11	1.59	3	7.5e-10	4.54e-08	yes	up	_	_	_
c8582_g2	4.98	23.86	2.24	7.62e-10	4.6e-08	yes	up	K17279	REEP5_6	_
c58744_g1	6.01	16.99	1.48	7.8e-10	4.71e-08	yes	up	_	_	_
c38619_g1	34.33	82.39	1.26	8.09e-10	4.87e-08	yes	up	K10960	chlP, bchP	path:ko00860;path:ko00900;path:ko01100;path:ko01110
c69394_g1	0.03	1.32	3.44	8.25e-10	4.96e-08	yes	up	_	_	_
c67087_g8	0.33	23.86	5.8	8.26e-10	4.96e-08	yes	up	_	_	_
c30527_g1	3.58	0.29	-3.23	8.41e-10	5.04e-08	yes	down	_	_	_
c55630_g1	128.18	266.09	1.05	8.8e-10	5.26e-08	yes	up	_	_	_
c57530_g1	94.58	42.27	-1.16	9.11e-10	5.44e-08	yes	down	_	_	_
c48422_g2	22.24	49.13	1.14	9.3e-10	5.55e-08	yes	up	K04688	RPS6KB	path:ko04012;path:ko04066;path:ko04150;path:ko04151;path:ko04152;path:ko04211;path:ko04212;path:ko04213;path:ko04350;path:ko04666;path:ko04910;path:ko04931;path:ko05205;path:ko05221;path:ko05231
c28811_g1	2.55	21.96	3.06	9.39e-10	5.6e-08	yes	up	_	_	_
c68362_g1	0.41	6.17	3.62	9.54e-10	5.68e-08	yes	up	_	_	_
c71708_g2	5.89	16.57	1.48	9.56e-10	5.68e-08	yes	up	_	_	_
c30342_g1	0	0.87	3.28	9.64e-10	5.71e-08	yes	up	_	_	_
c16526_g1	0.72	4.59	2.52	9.72e-10	5.75e-08	yes	up	_	_	_
c70269_g2	0	2.57	4.74	9.86e-10	5.83e-08	yes	up	_	_	_
c69288_g1	18.76	6.39	-1.54	1.04e-09	6.14e-08	yes	down	K03322	mntH	_
c60673_g3	2.99	12.99	2.08	1.05e-09	6.2e-08	yes	up	_	_	_
c44515_g2	23.2	9.61	-1.26	1.1e-09	6.48e-08	yes	down	_	_	_
c46994_g1	155.34	74.36	-1.06	1.13e-09	6.65e-08	yes	down	_	_	_
c48044_g1	4	0.38	-3.11	1.15e-09	6.72e-08	yes	down	K01537	E3.6.3.8	_
c38984_g1	1.07	9.5	3.04	1.16e-09	6.78e-08	yes	up	_	_	_
c66949_g1	1.86	11.65	2.58	1.16e-09	6.79e-08	yes	up	_	_	_
c66760_g2	0.24	1.81	2.49	1.17e-09	6.86e-08	yes	up	K13424	WRKY33	path:ko04626
c50432_g1	17.49	37.65	1.1	1.18e-09	6.9e-08	yes	up	_	_	_
c108876_g2	20.56	4.27	-2.24	1.24e-09	7.19e-08	yes	down	_	_	_
c63678_g1	9.05	20.53	1.17	1.27e-09	7.39e-08	yes	up	_	_	_
c57890_g2	101.52	28.08	-1.85	1.27e-09	7.39e-08	yes	down	K01623	ALDO	path:ko00010;path:ko00030;path:ko00051;path:ko00680;path:ko00710;path:ko01100;path:ko01110;path:ko01120;path:ko01130;path:ko01200;path:ko01230
c68217_g1	1.44	9.48	2.64	1.29e-09	7.49e-08	yes	up	_	_	_
c50175_g1	2.83	13.31	2.2	1.32e-09	7.62e-08	yes	up	_	_	_
c16268_g1	1.77	16.04	3.11	1.33e-09	7.69e-08	yes	up	_	_	_
c67524_g1	2.26	8.68	1.9	1.34e-09	7.7e-08	yes	up	_	_	_
c60918_g1	2.13	16.06	2.85	1.34e-09	7.7e-08	yes	up	_	_	_
c70613_g7	14.03	34.94	1.31	1.34e-09	7.71e-08	yes	up	K17099	ANXA13	_
c48964_g1	23.39	73.66	1.65	1.36e-09	7.78e-08	yes	up	_	_	_
c35258_g2	2.74	0.13	-3.64	1.36e-09	7.78e-08	yes	down	_	_	_
c63206_g1	11.56	28.03	1.27	1.38e-09	7.9e-08	yes	up	_	_	_
c67196_g5	0.11	1.58	2.98	1.38e-09	7.9e-08	yes	up	_	_	_
c68468_g2	27.85	13.42	-1.05	1.46e-09	8.33e-08	yes	down	_	_	_
c46424_g1	1.52	37.52	4.53	1.55e-09	8.8e-08	yes	up	_	_	_
c63069_g1	38.06	7.1	-2.41	1.58e-09	8.96e-08	yes	down	_	_	_
c63851_g1	2	13.58	2.7	1.64e-09	9.31e-08	yes	up	_	_	_
c65301_g2	1.67	4.91	1.5	1.67e-09	9.46e-08	yes	up	K14306	NUP62, NSP1	path:ko03013
c66381_g1	1.55	9.8	2.58	1.8e-09	1.02e-07	yes	up	_	_	_
c36768_g1	54.9	118.05	1.1	1.82e-09	1.03e-07	yes	up	K01623	ALDO	path:ko00010;path:ko00030;path:ko00051;path:ko00680;path:ko00710;path:ko01100;path:ko01110;path:ko01120;path:ko01130;path:ko01200;path:ko01230
c8266_g1	0.87	4.89	2.36	1.87e-09	1.06e-07	yes	up	_	_	_
c60116_g1	746.95	360.45	-1.05	1.88e-09	1.06e-07	yes	down	_	_	_
c61557_g1	22.25	52.2	1.23	1.89e-09	1.06e-07	yes	up	_	_	_
c69593_g1	20.59	45.19	1.13	1.92e-09	1.08e-07	yes	up	_	_	_
c57152_g2	0.08	1.04	2.69	1.93e-09	1.08e-07	yes	up	_	_	_
c43204_g1	22.94	61.43	1.42	1.94e-09	1.09e-07	yes	up	_	_	_
c66507_g1	13.92	28.75	1.04	1.94e-09	1.09e-07	yes	up	_	_	_
c67841_g1	2.92	6.82	1.19	1.95e-09	1.09e-07	yes	up	K00921	PIKFYVE, FAB1	path:ko00562;path:ko04070;path:ko04145;path:ko04810
c6242_g1	0	1.91	4.33	1.97e-09	1.1e-07	yes	up	_	_	_
c19041_g1	0.05	2.21	3.94	1.98e-09	1.1e-07	yes	up	_	_	_
c68821_g1	0	1.15	3.64	2e-09	1.11e-07	yes	up	_	_	_
c67709_g1	39.77	163.24	2.03	2.06e-09	1.15e-07	yes	up	K14085	ALDH7A1	path:ko00010;path:ko00053;path:ko00071;path:ko00260;path:ko00280;path:ko00300;path:ko00310;path:ko00330;path:ko00340;path:ko00380;path:ko00410;path:ko00561;path:ko00620;path:ko01100;path:ko01110;path:ko01120;path:ko01130;path:ko01230
c67126_g2	0.8	10.45	3.56	2.08e-09	1.15e-07	yes	up	K00799	GST, gst	path:ko00480;path:ko00980;path:ko00982;path:ko05204
c40133_g1	0.74	20.08	4.58	2.08e-09	1.15e-07	yes	up	_	_	_
c62718_g3	33.96	16.44	-1.04	2.12e-09	1.17e-07	yes	down	K17943	PUM	_
c68693_g3	10.29	2.82	-1.83	2.2e-09	1.21e-07	yes	down	_	_	_
c71983_g1	0.68	3.92	2.37	2.23e-09	1.23e-07	yes	up	_	_	_
c51564_g2	0	2.78	4.85	2.26e-09	1.24e-07	yes	up	_	_	_
c60401_g1	3.17	21.9	2.75	2.29e-09	1.26e-07	yes	up	_	_	_
c60300_g3	5.73	13.16	1.19	2.38e-09	1.31e-07	yes	up	_	_	_
c66858_g10	15.7	32.31	1.04	2.39e-09	1.31e-07	yes	up	_	_	_
c69234_g4	36.62	84.71	1.21	2.41e-09	1.32e-07	yes	up	K00799	GST, gst	path:ko00480;path:ko00980;path:ko00982;path:ko05204
c62782_g1	88.42	40.99	-1.11	2.41e-09	1.32e-07	yes	down	_	_	_
c58369_g1	0.48	5.51	3.27	2.48e-09	1.35e-07	yes	up	_	_	_
c58345_g1	42.14	87.61	1.05	2.5e-09	1.36e-07	yes	up	_	_	_
c68672_g1	7.14	1.48	-2.19	2.57e-09	1.4e-07	yes	down	_	_	_
c68600_g2	4.32	9.77	1.16	2.61e-09	1.41e-07	yes	up	K15601	KDM3	_
c64356_g1	22.44	5.63	-1.98	2.61e-09	1.41e-07	yes	down	K15382	SLC50A, SWEET	_
c69347_g1	0.05	2.14	3.86	2.62e-09	1.42e-07	yes	up	_	_	_
c65904_g1	16.32	38.61	1.24	2.71e-09	1.47e-07	yes	up	_	_	_
c64865_g8	23.34	49.08	1.07	2.73e-09	1.47e-07	yes	up	K00966	GMPP	path:ko00051;path:ko00520;path:ko01100;path:ko01110
c58594_g1	1.67	0.05	-3.61	2.77e-09	1.49e-07	yes	down	_	_	_
c70138_g1	2.56	6.31	1.27	2.77e-09	1.49e-07	yes	up	_	_	_
c15277_g2	4.73	0.34	-3.46	2.93e-09	1.57e-07	yes	down	_	_	_
c30761_g1	25.79	10.95	-1.23	2.94e-09	1.58e-07	yes	down	_	_	_
c66375_g1	0.2	2.22	2.93	2.99e-09	1.6e-07	yes	up	_	_	_
c48232_g1	8.32	42.47	2.34	3.07e-09	1.64e-07	yes	up	K00430	E1.11.1.7	path:ko00940;path:ko01100;path:ko01110
c56676_g1	0.03	0.79	2.75	3.1e-09	1.66e-07	yes	up	_	_	_
c61747_g1	20.96	46.74	1.15	3.16e-09	1.69e-07	yes	up	_	_	_
c66199_g4	0.08	2.85	4.06	3.26e-09	1.74e-07	yes	up	_	_	_
c62088_g3	0.78	10.26	3.56	3.29e-09	1.75e-07	yes	up	K14709	SLC39A1_2_3, ZIP1_2_3	_
c61718_g2	0.07	7.21	5.47	3.38e-09	1.79e-07	yes	up	K01953	asnB, ASNS	path:ko00250;path:ko01100;path:ko01110
c58229_g2	0.13	2.11	3.29	3.4e-09	1.8e-07	yes	up	K08819	CDK12_13	_
c45640_g1	0	2.99	4.95	3.47e-09	1.84e-07	yes	up	K00799	GST, gst	path:ko00480;path:ko00980;path:ko00982;path:ko05204
c67155_g8	12.51	36.14	1.52	3.59e-09	1.9e-07	yes	up	K13071	PAO, ACD1	path:ko00860;path:ko01110
c70289_g1	6.27	14.82	1.23	3.82e-09	2.02e-07	yes	up	_	_	_
c67461_g1	26.78	10.61	-1.33	3.86e-09	2.04e-07	yes	down	K02220	CLB1_2	path:ko04011;path:ko04111
c68686_g2	27.73	79.81	1.52	3.86e-09	2.04e-07	yes	up	K05857	PLCD	path:ko00562;path:ko01100;path:ko04020;path:ko04070;path:ko04919;path:ko04933
c15490_g1	50.56	24.48	-1.04	3.97e-09	2.09e-07	yes	down	K15920	XYL4	path:ko00500;path:ko00520;path:ko01100
c70499_g1	19.38	53.43	1.46	4.13e-09	2.17e-07	yes	up	K02638	petE	path:ko00195
c58745_g1	2.34	11.73	2.28	4.17e-09	2.19e-07	yes	up	_	_	_
c72271_g1	2.41	10.65	2.1	4.19e-09	2.19e-07	yes	up	_	_	_
c60525_g1	22.08	47.81	1.11	4.19e-09	2.19e-07	yes	up	_	_	_
c62321_g1	24.52	56.8	1.21	4.25e-09	2.22e-07	yes	up	K00830	AGXT	path:ko00250;path:ko00260;path:ko00630;path:ko00680;path:ko01100;path:ko01110;path:ko01120;path:ko01130;path:ko01200;path:ko04146
c54350_g1	0.26	6.09	4.08	4.31e-09	2.25e-07	yes	up	_	_	_
c65665_g14	32.51	72.38	1.15	4.33e-09	2.25e-07	yes	up	_	_	_
c44461_g1	0.99	7.9	2.87	4.34e-09	2.26e-07	yes	up	_	_	_
c38278_g1	34.5	15.3	-1.17	4.35e-09	2.26e-07	yes	down	_	_	_
c96456_g1	0	16.16	7.35	4.39e-09	2.28e-07	yes	up	_	_	_
c37412_g1	0.1	2.83	3.9	4.73e-09	2.45e-07	yes	up	_	_	_
c54223_g2	0.44	6.7	3.66	4.85e-09	2.51e-07	yes	up	_	_	_
c65417_g3	2.7	11.24	2.02	4.94e-09	2.56e-07	yes	up	K03327	TC.MATE, SLC47A, norM, mdtK, dinF	_
c31823_g2	23.77	11.42	-1.05	4.97e-09	2.56e-07	yes	down	K01792	E5.1.3.15	path:ko00010;path:ko01100;path:ko01110;path:ko01120;path:ko01130
c66381_g2	0.89	6.76	2.79	4.97e-09	2.56e-07	yes	up	_	_	_
c35862_g1	16.78	40.17	1.25	5.01e-09	2.58e-07	yes	up	_	_	_
c62059_g3	1.57	8.84	2.43	5.06e-09	2.6e-07	yes	up	_	_	_
c71856_g4	49.03	22.58	-1.12	5.06e-09	2.6e-07	yes	down	_	_	_
c87612_g1	9.96	1.98	-2.27	5.07e-09	2.6e-07	yes	down	_	_	_
c69862_g1	21.15	44.07	1.06	5.09e-09	2.61e-07	yes	up	_	_	_
c46030_g1	0.05	2.04	3.86	5.2e-09	2.66e-07	yes	up	K05277	E1.14.11.19	path:ko00941;path:ko01100;path:ko01110
c55712_g1	4.57	17.57	1.92	5.22e-09	2.67e-07	yes	up	_	_	_
c66093_g1	0.38	3.45	2.88	5.26e-09	2.68e-07	yes	up	K00430	E1.11.1.7	path:ko00940;path:ko01100;path:ko01110
c67714_g2	11.45	28.72	1.32	5.27e-09	2.68e-07	yes	up	_	_	_
c41768_g1	63.97	31.28	-1.03	5.48e-09	2.79e-07	yes	down	_	_	_
c53500_g3	1.66	12.29	2.81	5.6e-09	2.84e-07	yes	up	_	_	_
c24124_g1	50.26	119.93	1.25	5.63e-09	2.85e-07	yes	up	K02701	psaN	path:ko00195;path:ko01100
c65688_g1	41.47	7.71	-2.41	5.65e-09	2.86e-07	yes	down	_	_	_
c48736_g1	3.34	0.5	-2.51	5.72e-09	2.89e-07	yes	down	_	_	_
c68199_g1	9.79	2.52	-1.92	5.77e-09	2.91e-07	yes	down	_	_	_
c65208_g1	119.8	57	-1.07	5.77e-09	2.91e-07	yes	down	K15403	ACE, HTH	path:ko00073
c70513_g5	5.11	14.51	1.49	5.77e-09	2.91e-07	yes	up	_	_	_
c69141_g1	8.69	22.29	1.35	5.85e-09	2.94e-07	yes	up	K17757	CARKD	_
c49031_g1	9.6	3.86	-1.29	5.86e-09	2.94e-07	yes	down	_	_	_
c66360_g1	1.88	9.02	2.2	5.86e-09	2.94e-07	yes	up	_	_	_
c23411_g1	19.53	48.56	1.31	6.22e-09	3.12e-07	yes	up	_	_	_
c60699_g1	0	0.82	3.2	6.32e-09	3.16e-07	yes	up	_	_	_
c57293_g1	0.02	1.08	3.27	6.34e-09	3.17e-07	yes	up	_	_	_
c57472_g1	23.33	107.04	2.19	6.4e-09	3.19e-07	yes	up	_	_	_
c63589_g1	3.2	8.66	1.41	6.64e-09	3.31e-07	yes	up	_	_	_
c64056_g3	17.43	7.68	-1.17	6.72e-09	3.34e-07	yes	down	K00030	IDH3	path:ko00020;path:ko01100;path:ko01110;path:ko01120;path:ko01130;path:ko01200;path:ko01210;path:ko01230
c4170_g1	133.44	65.35	-1.03	6.82e-09	3.39e-07	yes	down	K00026	MDH2	path:ko00020;path:ko00270;path:ko00620;path:ko00630;path:ko00710;path:ko01100;path:ko01110;path:ko01120;path:ko01130;path:ko01200
c52906_g1	5.28	19.64	1.87	6.83e-09	3.39e-07	yes	up	_	_	_
c63270_g1	9.78	30.13	1.61	7.08e-09	3.51e-07	yes	up	_	_	_
c11569_g1	0.01	0.96	3.21	7.24e-09	3.58e-07	yes	up	K13448	CML	path:ko04626
c70753_g3	0	0.83	3.22	7.3e-09	3.61e-07	yes	up	_	_	_
c58096_g1	0.13	1.86	3.06	7.32e-09	3.62e-07	yes	up	_	_	_
c63318_g1	41.55	15.77	-1.39	7.37e-09	3.64e-07	yes	down	_	_	_
c23477_g1	14.82	30.78	1.05	7.41e-09	3.65e-07	yes	up	_	_	_
c53895_g2	0.32	3.46	3.1	7.43e-09	3.66e-07	yes	up	_	_	_
c61945_g1	81.49	40.32	-1.01	7.6e-09	3.73e-07	yes	down	K03549	kup	_
c66664_g2	158.77	77.98	-1.02	7.68e-09	3.77e-07	yes	down	K04077	groEL, HSPD1	path:ko03018;path:ko04212;path:ko04940;path:ko05134;path:ko05152
c40039_g1	1.07	6.73	2.55	8.01e-09	3.92e-07	yes	up	_	_	_
c61046_g1	73.7	26.86	-1.45	8.15e-09	3.99e-07	yes	down	_	_	_
c29080_g1	5.96	1.27	-2.14	8.2e-09	4.01e-07	yes	down	_	_	_
c66791_g1	7.27	16.31	1.15	8.27e-09	4.03e-07	yes	up	_	_	_
c64769_g1	2.47	9.77	1.94	8.29e-09	4.04e-07	yes	up	_	_	_
c69579_g2	180.14	90.53	-0.99	8.42e-09	4.1e-07	no	down	_	_	_
c69521_g3	2.52	0.2	-3.12	8.61e-09	4.19e-07	yes	down	K13963	SERPINB	path:ko05146
c60356_g1	0.03	1.19	3.29	8.91e-09	4.32e-07	yes	up	_	_	_
c66238_g1	3.06	8.87	1.51	9.01e-09	4.37e-07	yes	up	K08202	SLC22A4_5, OCTN	path:ko05231
c31744_g2	0.08	4.54	4.69	9.25e-09	4.48e-07	yes	up	_	_	_
c94182_g1	0.53	3.85	2.65	9.64e-09	4.66e-07	yes	up	_	_	_
c60718_g1	5.65	0.5	-3.25	9.71e-09	4.69e-07	yes	down	_	_	_
c29725_g1	25.06	5.9	-2.07	9.73e-09	4.69e-07	yes	down	_	_	_
c58152_g1	3.79	12	1.64	9.74e-09	4.69e-07	yes	up	K09419	HSFF	_
c18835_g1	233.97	110.42	-1.08	9.77e-09	4.7e-07	yes	down	K11254	H4	path:ko05034;path:ko05203;path:ko05322
c8582_g1	42.78	13.42	-1.67	9.85e-09	4.73e-07	yes	down	_	_	_
c61136_g1	27.73	10.62	-1.38	9.91e-09	4.76e-07	yes	down	_	_	_
c70471_g2	69.56	181.13	1.38	9.93e-09	4.76e-07	yes	up	_	_	_
c70446_g2	12.6	31.59	1.32	1.02e-08	4.87e-07	yes	up	K09338	HD-ZIP	_
c57054_g1	15.1	33.79	1.16	1.03e-08	4.93e-07	yes	up	_	_	_
c68876_g3	1.71	15.25	3.08	1.06e-08	5.08e-07	yes	up	_	_	_
c60009_g1	0.08	1.6	3.21	1.09e-08	5.21e-07	yes	up	K13384	E2.1.1.140	path:ko00950;path:ko01100;path:ko01110
c71420_g1	4.91	17.31	1.8	1.11e-08	5.28e-07	yes	up	_	_	_
c12270_g1	0.03	2.1	4.09	1.13e-08	5.37e-07	yes	up	_	_	_
c60247_g2	0.21	1.85	2.67	1.16e-08	5.51e-07	yes	up	K13508	GPAT	path:ko00561;path:ko00564;path:ko01100;path:ko01110
c68264_g1	1.31	5.64	2.02	1.17e-08	5.54e-07	yes	up	_	_	_
c71491_g1	37.71	91.89	1.28	1.18e-08	5.57e-07	yes	up	_	_	_
c63538_g1	14.79	32.78	1.14	1.18e-08	5.59e-07	yes	up	_	_	_
c56341_g1	9.41	3.48	-1.41	1.19e-08	5.63e-07	yes	down	_	_	_
c52534_g1	28.74	11.58	-1.3	1.2e-08	5.65e-07	yes	down	K08486	STX1B_2_3	path:ko04130;path:ko04721
c65734_g1	3.48	0.68	-2.2	1.2e-08	5.65e-07	yes	down	_	_	_
c39840_g2	6.46	1.31	-2.22	1.2e-08	5.65e-07	yes	down	_	_	_
c56204_g1	2.48	9.35	1.87	1.22e-08	5.73e-07	yes	up	K07901	RAB8A, MEL	path:ko04144;path:ko04152;path:ko04972
c30315_g1	1.63	10.77	2.65	1.23e-08	5.77e-07	yes	up	K14638	SLC15A3_4, PHT	_
c30688_g1	57	111.13	0.96	1.26e-08	5.91e-07	no	up	_	_	_
c66904_g1	18.36	40.79	1.15	1.27e-08	5.95e-07	yes	up	K00457	HPD, hppD	path:ko00130;path:ko00350;path:ko00360;path:ko01100
c59867_g1	3.56	130.76	5.16	1.3e-08	6.1e-07	yes	up	K06910	K06910	_
c66975_g2	0.1	1.28	2.77	1.33e-08	6.2e-07	yes	up	K14826	FPR3_4	_
c48255_g1	0.04	0.97	2.94	1.33e-08	6.22e-07	yes	up	_	_	_
c45685_g1	1.05	23.61	4.36	1.42e-08	6.62e-07	yes	up	_	_	_
c11802_g1	0.15	2.33	3.25	1.45e-08	6.74e-07	yes	up	_	_	_
c68258_g1	0.19	4.42	3.95	1.46e-08	6.77e-07	yes	up	_	_	_
c69262_g1	19.07	8.55	-1.15	1.49e-08	6.92e-07	yes	down	_	_	_
c11640_g1	2.4	0.04	-4.14	1.53e-08	7.07e-07	yes	down	_	_	_
c28932_g1	103.28	252.14	1.29	1.53e-08	7.07e-07	yes	up	K02692	psaD	path:ko00195;path:ko01100
c65945_g1	0.76	4.47	2.42	1.54e-08	7.12e-07	yes	up	_	_	_
c37161_g1	79.7	190.59	1.26	1.61e-08	7.43e-07	yes	up	_	_	_
c66064_g2	0.81	7.36	3.03	1.65e-08	7.62e-07	yes	up	_	_	_
c64204_g1	0	0.5	2.59	1.68e-08	7.75e-07	yes	up	K03644	lipA	path:ko00785;path:ko01100
c25446_g1	116.66	42.07	-1.47	1.69e-08	7.78e-07	yes	down	_	_	_
c57646_g1	4.54	11.54	1.33	1.71e-08	7.88e-07	yes	up	_	_	_
c70870_g3	13.62	2.59	-2.35	1.76e-08	8.06e-07	yes	down	_	_	_
c63111_g4	19.15	46.06	1.26	1.77e-08	8.14e-07	yes	up	_	_	_
c27248_g1	0.04	1.44	3.43	1.86e-08	8.52e-07	yes	up	_	_	_
c55659_g1	0	0.46	2.49	1.92e-08	8.77e-07	yes	up	_	_	_
c71336_g6	7.8	21.86	1.48	1.92e-08	8.77e-07	yes	up	_	_	_
c62720_g1	4.87	12.51	1.34	1.93e-08	8.8e-07	yes	up	K01592	E4.1.1.25	path:ko00350;path:ko00950;path:ko01100;path:ko01110
c54442_g1	0	1.43	3.94	2e-08	9.11e-07	yes	up	_	_	_
c47726_g1	13.03	30.61	1.23	2e-08	9.11e-07	yes	up	_	_	_
c65010_g1	0.08	9.37	5.75	2.04e-08	9.28e-07	yes	up	_	_	_
c49586_g2	6.15	14.15	1.19	2.12e-08	9.65e-07	yes	up	K14638	SLC15A3_4, PHT	_
c30726_g1	45.37	21.32	-1.09	2.13e-08	9.68e-07	yes	down	K10808	RRM2	path:ko00230;path:ko00240;path:ko00480;path:ko01100;path:ko04115
c53900_g1	7.48	19.83	1.39	2.18e-08	9.87e-07	yes	up	_	_	_
c65288_g1	0.05	0.65	2.35	2.22e-08	1e-06	yes	up	_	_	_
c61545_g1	2.53	18.74	2.84	2.22e-08	1e-06	yes	up	_	_	_
c36418_g1	2.43	0.12	-3.5	2.27e-08	1.03e-06	yes	down	_	_	_
c66961_g1	0.12	40.16	7.49	2.32e-08	1.04e-06	yes	up	_	_	_
c70185_g5	9.73	32.67	1.74	2.34e-08	1.05e-06	yes	up	K16055	TPS	path:ko00500;path:ko01100
c45640_g2	1.82	17.1	3.17	2.36e-08	1.06e-06	yes	up	K00799	GST, gst	path:ko00480;path:ko00980;path:ko00982;path:ko05204
c62191_g1	0	0.64	2.89	2.38e-08	1.07e-06	yes	up	K15401	CYP86A1	path:ko00073
c55356_g1	30.14	81.12	1.43	2.4e-08	1.08e-06	yes	up	_	_	_
c67493_g1	2.3	8.17	1.78	2.5e-08	1.12e-06	yes	up	_	_	_
c23645_g1	2.01	9.93	2.25	2.54e-08	1.14e-06	yes	up	_	_	_
c61349_g3	3.81	24.01	2.62	2.57e-08	1.15e-06	yes	up	K14156	CHK	path:ko00564;path:ko01100;path:ko05231
c64345_g1	11.4	27.52	1.26	2.58e-08	1.15e-06	yes	up	_	_	_
c60554_g1	46.76	159.04	1.76	2.58e-08	1.15e-06	yes	up	_	_	_
c37657_g1	3.24	0.16	-3.68	2.6e-08	1.16e-06	yes	down	_	_	_
c79482_g1	14.8	5.6	-1.39	2.61e-08	1.16e-06	yes	down	K12356	UGT72E	path:ko00940
c60588_g2	1.2	0.05	-3.11	2.62e-08	1.17e-06	yes	down	_	_	_
c62300_g1	6.63	15.31	1.2	2.63e-08	1.17e-06	yes	up	K09338	HD-ZIP	_
c67376_g2	2.88	9.55	1.69	2.66e-08	1.18e-06	yes	up	K11975	RNF144	_
c67495_g1	20.67	43.91	1.08	2.66e-08	1.18e-06	yes	up	K14399	CLP1, HERB	path:ko03015
c69981_g1	30.65	60.87	0.99	2.68e-08	1.19e-06	no	up	_	_	_
c58806_g1	5.89	1.3	-2.1	2.69e-08	1.19e-06	yes	down	K03327	TC.MATE, SLC47A, norM, mdtK, dinF	_
c49310_g1	6.44	17.46	1.43	2.7e-08	1.19e-06	yes	up	_	_	_
c70073_g7	12.9	2.97	-2.08	2.75e-08	1.21e-06	yes	down	_	_	_
c70547_g1	2.04	18.68	3.13	2.76e-08	1.21e-06	yes	up	_	_	_
c62591_g1	27.49	13.36	-1.03	2.77e-08	1.22e-06	yes	down	_	_	_
c68122_g2	0.02	0.96	3.18	2.83e-08	1.24e-06	yes	up	_	_	_
c58113_g2	0.33	4.41	3.4	2.83e-08	1.24e-06	yes	up	_	_	_
c66959_g3	1.83	9.66	2.34	2.86e-08	1.25e-06	yes	up	K12235	SRR	path:ko00260
c50374_g1	59.3	22.57	-1.39	2.88e-08	1.26e-06	yes	down	_	_	_
c37017_g1	58.69	115.88	0.98	2.89e-08	1.27e-06	no	up	_	_	_
c58707_g1	0.93	0.09	-2.4	2.94e-08	1.28e-06	yes	down	_	_	_
c10577_g1	27.85	56.17	1.01	2.99e-08	1.3e-06	yes	up	_	_	_
c64359_g1	59.81	110.02	0.88	3.15e-08	1.37e-06	no	up	K01507	ppa	path:ko00190
c57383_g2	7.25	34.55	2.24	3.17e-08	1.38e-06	yes	up	_	_	_
c22155_g1	0.15	1.83	2.93	3.18e-08	1.38e-06	yes	up	_	_	_
c54449_g1	5.63	19.53	1.78	3.24e-08	1.41e-06	yes	up	K00111	glpA, glpD	path:ko00564;path:ko01110
c37820_g1	0.45	13.94	4.67	3.29e-08	1.43e-06	yes	up	_	_	_
c56440_g3	192.87	94.01	-1.04	3.38e-08	1.47e-06	yes	down	K02997	RP-S9e, RPS9	path:ko03010
c48015_g1	2.51	11.31	2.13	3.41e-08	1.48e-06	yes	up	_	_	_
c63233_g1	0.32	2.82	2.8	3.43e-08	1.48e-06	yes	up	_	_	_
c68850_g2	11.64	2.1	-2.41	3.44e-08	1.49e-06	yes	down	_	_	_
c68038_g3	17.06	33.48	0.97	3.49e-08	1.51e-06	no	up	K12619	XRN2, RAT1	path:ko03008;path:ko03018
c72130_g1	22	9.02	-1.28	3.49e-08	1.51e-06	yes	down	_	_	_
c44223_g2	0.69	6.13	2.99	3.64e-08	1.57e-06	yes	up	_	_	_
c54246_g1	178.39	90.92	-0.97	3.65e-08	1.57e-06	no	down	K15040	VDAC2	path:ko04020;path:ko04022;path:ko05012;path:ko05016;path:ko05166
c70687_g1	86.94	48.57	-0.84	3.67e-08	1.57e-06	no	down	_	_	_
c53847_g2	23.18	5.67	-2.01	3.71e-08	1.59e-06	yes	down	_	_	_
c67101_g1	7.13	2.26	-1.62	3.75e-08	1.6e-06	yes	down	_	_	_
c70616_g9	36.84	15.62	-1.23	3.83e-08	1.64e-06	yes	down	K13413	MKK4_5P	path:ko04626
c53062_g1	0.62	0	-2.85	3.86e-08	1.65e-06	yes	down	_	_	_
c71420_g2	0.2	2.54	3.12	3.89e-08	1.66e-06	yes	up	K13420	FLS2	path:ko04626
c65214_g1	0	0.83	3.21	3.92e-08	1.67e-06	yes	up	_	_	_
c57176_g4	13.55	32.71	1.26	3.95e-08	1.68e-06	yes	up	K00573	E2.1.1.77, pcm	_
c71223_g1	40.3	80.59	1	3.98e-08	1.69e-06	no	up	_	_	_
c45759_g1	1.4	0.06	-3.25	4e-08	1.7e-06	yes	down	_	_	_
c5832_g2	0.09	2.13	3.55	4.06e-08	1.72e-06	yes	up	_	_	_
c51125_g1	0.11	2.81	3.8	4.35e-08	1.85e-06	yes	up	_	_	_
c71860_g1	1.02	11.17	3.33	4.42e-08	1.87e-06	yes	up	_	_	_
c50153_g1	0.17	8.29	4.95	4.5e-08	1.9e-06	yes	up	_	_	_
c34188_g1	2.28	0.15	-3.26	4.51e-08	1.91e-06	yes	down	_	_	_
c71460_g1	0.62	4.37	2.63	4.52e-08	1.91e-06	yes	up	_	_	_
c65806_g1	1.31	10.05	2.85	4.52e-08	1.91e-06	yes	up	K08241	E2.1.1.141	path:ko00592;path:ko01110
c71677_g1	8.81	17.53	0.98	4.56e-08	1.92e-06	no	up	_	_	_
c71956_g1	183.93	44.13	-2.06	4.74e-08	1.99e-06	yes	down	K00261	GLUD1_2, gdhA	path:ko00220;path:ko00250;path:ko00471;path:ko00910;path:ko01100;path:ko01200;path:ko04964
c22363_g1	0.49	3.54	2.63	4.81e-08	2.02e-06	yes	up	_	_	_
c66546_g2	34.01	73.65	1.11	4.82e-08	2.03e-06	yes	up	K07198	PRKAA, AMPK	path:ko04068;path:ko04140;path:ko04150;path:ko04151;path:ko04152;path:ko04211;path:ko04213;path:ko04710;path:ko04910;path:ko04920;path:ko04921;path:ko04922;path:ko04931;path:ko04932;path:ko05410
c57259_g1	2.32	10.46	2.13	4.97e-08	2.08e-06	yes	up	_	_	_
c67709_g2	3.02	8.06	1.39	5e-08	2.09e-06	yes	up	_	_	_
c108942_g1	0.02	1.43	3.63	5.01e-08	2.09e-06	yes	up	K00430	E1.11.1.7	path:ko00940;path:ko01100;path:ko01110
c51794_g3	8.87	3.63	-1.27	5.06e-08	2.12e-06	yes	down	_	_	_
c67990_g2	14.72	5.21	-1.48	5.16e-08	2.15e-06	yes	down	_	_	_
c42792_g1	0.55	0	-2.7	5.25e-08	2.19e-06	yes	down	_	_	_
c70477_g1	2.44	7.93	1.66	5.28e-08	2.2e-06	yes	up	K01681	ACO, acnA	path:ko00020;path:ko00630;path:ko00720;path:ko01100;path:ko01110;path:ko01120;path:ko01130;path:ko01200;path:ko01210;path:ko01230
c3317_g1	11.38	24.81	1.12	5.29e-08	2.2e-06	yes	up	_	_	_
c69844_g1	3.63	10.29	1.48	5.29e-08	2.2e-06	yes	up	_	_	_
c4562_g1	43.23	85.54	0.98	5.3e-08	2.2e-06	no	up	_	_	_
c51763_g1	0.05	1.26	3.23	5.41e-08	2.24e-06	yes	up	_	_	_
c62233_g1	17.37	129.32	2.89	5.41e-08	2.24e-06	yes	up	_	_	_
c60282_g3	1.11	11.75	3.29	5.44e-08	2.25e-06	yes	up	K13065	E2.3.1.133, HCT	path:ko00940;path:ko00941;path:ko00945;path:ko01100;path:ko01110
c63660_g3	9.64	22.48	1.21	5.47e-08	2.26e-06	yes	up	_	_	_
c71829_g3	4.11	10.24	1.29	5.49e-08	2.27e-06	yes	up	_	_	_
c50895_g2	15.64	31.7	1.01	5.59e-08	2.3e-06	yes	up	K14509	ETR, ERS	path:ko04075
c72112_g1	45.93	20.7	-1.15	5.61e-08	2.31e-06	yes	down	_	_	_
c64046_g1	51.65	25.92	-0.99	5.64e-08	2.32e-06	no	down	K01803	TPI, tpiA	path:ko00010;path:ko00051;path:ko00562;path:ko00710;path:ko01100;path:ko01110;path:ko01120;path:ko01130;path:ko01200;path:ko01230
c67590_g1	19.97	8.9	-1.16	5.67e-08	2.33e-06	yes	down	K03364	CDH1	path:ko04110;path:ko04111;path:ko04120;path:ko04914
c70616_g12	298.73	152.76	-0.97	5.82e-08	2.39e-06	no	down	K11253	H3	path:ko05034;path:ko05202;path:ko05322
c8781_g1	0	9.48	6.58	5.87e-08	2.41e-06	yes	up	K09286	EREBP	_
c53377_g1	0.04	2.2	4.07	6.01e-08	2.46e-06	yes	up	K03327	TC.MATE, SLC47A, norM, mdtK, dinF	_
c65876_g1	11.04	25.12	1.18	6.04e-08	2.47e-06	yes	up	K15639	CYP734A1, BAS1	path:ko00905
c71084_g2	4.08	0.8	-2.21	6.11e-08	2.5e-06	yes	down	_	_	_
c57153_g1	1.14	0.19	-2.11	6.17e-08	2.52e-06	yes	down	_	_	_
c68472_g6	9.81	1.69	-2.47	6.27e-08	2.56e-06	yes	down	_	_	_
c63641_g1	66.76	128.09	0.94	6.3e-08	2.57e-06	no	up	_	_	_
c63374_g1	37.32	71.47	0.94	6.32e-08	2.57e-06	no	up	K08679	E5.1.3.6	path:ko00500;path:ko00520;path:ko01100
c86825_g1	0.11	3.37	4.07	6.34e-08	2.58e-06	yes	up	_	_	_
c40220_g1	2.14	12.48	2.49	6.41e-08	2.6e-06	yes	up	_	_	_
c79449_g1	15.97	3.5	-2.16	6.62e-08	2.68e-06	yes	down	_	_	_
c69945_g1	0.05	1.98	3.76	6.82e-08	2.76e-06	yes	up	_	_	_
c64217_g2	12.07	28.41	1.23	6.88e-08	2.78e-06	yes	up	K16296	SCPL-I	_
c16046_g2	172.61	332.65	0.95	6.89e-08	2.79e-06	no	up	_	_	_
c63027_g2	20.14	7.67	-1.38	6.91e-08	2.79e-06	yes	down	K13946	AUX1, LAX	path:ko04075
c71496_g2	6.63	16.64	1.31	6.93e-08	2.79e-06	yes	up	K17275	PLS1	_
c60639_g1	0.87	8.9	3.21	6.97e-08	2.81e-06	yes	up	_	_	_
c39176_g1	0.43	3.96	2.94	7.06e-08	2.84e-06	yes	up	_	_	_
c66423_g1	21.43	221.57	3.36	7.07e-08	2.84e-06	yes	up	K08912	LHCB1	path:ko00196;path:ko01100
c71730_g2	0.68	3.77	2.32	7.17e-08	2.88e-06	yes	up	K13457	RPM1, RPS3	path:ko04626
c69196_g3	6.74	15.47	1.19	7.21e-08	2.89e-06	yes	up	_	_	_
c68570_g3	7.71	17.07	1.14	7.28e-08	2.92e-06	yes	up	K15014	SLC29A1_2_3, ENT1_2_3	_
c18877_g1	12.45	4.68	-1.39	7.35e-08	2.94e-06	yes	down	_	_	_
c71602_g2	49.23	123.73	1.33	7.51e-08	3.01e-06	yes	up	_	_	_
c66409_g2	14.78	29.68	1	7.57e-08	3.02e-06	yes	up	K08869	ADCK, ABC1	_
c57259_g2	2.36	14.37	2.56	7.64e-08	3.05e-06	yes	up	_	_	_
c18513_g1	3.01	11.64	1.92	7.64e-08	3.05e-06	yes	up	_	_	_
c106355_g1	0.2	4.01	3.76	7.68e-08	3.06e-06	yes	up	_	_	_
c4787_g1	24.63	10.78	-1.18	7.72e-08	3.07e-06	yes	down	_	_	_
c71501_g4	47.24	105.97	1.16	7.78e-08	3.09e-06	yes	up	K00432	E1.11.1.9	path:ko00480;path:ko00590;path:ko04918
c50690_g1	18.93	49.17	1.37	7.8e-08	3.1e-06	yes	up	_	_	_
c44198_g1	184.4	96.68	-0.93	7.87e-08	3.12e-06	no	down	K15102	SLC25A3, PHC, PIC	_
c65934_g2	20.03	9.31	-1.1	7.9e-08	3.13e-06	yes	down	_	_	_
c65271_g1	34.06	82.34	1.27	8.05e-08	3.19e-06	yes	up	K02693	psaE	path:ko00195;path:ko01100
c58229_g5	0.38	3.17	2.76	8.08e-08	3.19e-06	yes	up	K08819	CDK12_13	_
c67388_g1	39.47	19.03	-1.05	8.12e-08	3.21e-06	yes	down	K00688	E2.4.1.1, glgP, PYG	path:ko00500;path:ko01100;path:ko01110;path:ko04910;path:ko04922;path:ko04931
c55538_g4	44.24	21.58	-1.03	8.13e-08	3.21e-06	yes	down	_	_	_
c64386_g1	9.67	35.87	1.88	8.15e-08	3.21e-06	yes	up	_	_	_
c80715_g1	0.89	4.58	2.24	8.3e-08	3.27e-06	yes	up	_	_	_
c52126_g1	0.39	2.42	2.37	8.4e-08	3.31e-06	yes	up	_	_	_
c38407_g1	2.02	0.17	-2.98	8.47e-08	3.33e-06	yes	down	_	_	_
c71377_g1	84.45	44.34	-0.93	8.57e-08	3.37e-06	no	down	K00164	OGDH, sucA	path:ko00020;path:ko00310;path:ko00380;path:ko01100;path:ko01110;path:ko01120;path:ko01130;path:ko01200
c63416_g7	0.05	1.38	3.3	8.59e-08	3.37e-06	yes	up	_	_	_
c60215_g1	13.44	34.95	1.37	8.62e-08	3.38e-06	yes	up	_	_	_
c49068_g1	198.77	428.09	1.11	8.71e-08	3.41e-06	yes	up	K09872	PIP	_
c64728_g1	2.57	0.32	-2.68	8.71e-08	3.41e-06	yes	down	_	_	_
c43255_g2	2.54	0.13	-3.53	8.75e-08	3.42e-06	yes	down	_	_	_
c57055_g3	8.4	45.87	2.44	8.81e-08	3.43e-06	yes	up	K15634	gpmB	path:ko00010;path:ko00260;path:ko00680;path:ko01100;path:ko01110;path:ko01120;path:ko01130;path:ko01200;path:ko01230
c54076_g1	0.02	0.93	3.06	8.81e-08	3.43e-06	yes	up	K04120	E5.5.1.13	path:ko00904;path:ko01100;path:ko01110
c48576_g1	4.24	0.21	-3.81	8.88e-08	3.46e-06	yes	down	_	_	_
c58472_g1	2.85	11.25	1.94	9.08e-08	3.53e-06	yes	up	_	_	_
c68582_g1	0	0.23	1.67	9.37e-08	3.64e-06	yes	up	_	_	_
c55908_g1	5.46	120.09	4.43	9.39e-08	3.65e-06	yes	up	_	_	_
c58398_g1	31.47	17.08	-0.88	9.45e-08	3.66e-06	no	down	_	_	_
c46768_g1	0.32	2.69	2.74	9.54e-08	3.69e-06	yes	up	_	_	_
c63397_g2	0	1.05	3.52	9.55e-08	3.69e-06	yes	up	_	_	_
c68174_g2	7.83	3.02	-1.35	9.67e-08	3.74e-06	yes	down	_	_	_
c55567_g1	0.06	0.97	2.76	9.7e-08	3.75e-06	yes	up	_	_	_
c64335_g1	8.73	20.23	1.2	9.82e-08	3.79e-06	yes	up	_	_	_
c61349_g1	8.78	29.84	1.75	9.94e-08	3.83e-06	yes	up	K14156	CHK	path:ko00564;path:ko01100;path:ko05231
c69322_g5	0	34.9	8.45	9.99e-08	3.84e-06	yes	up	_	_	_
c60861_g1	2.03	11.38	2.43	1.01e-07	3.88e-06	yes	up	_	_	_
c71987_g1	51.9	25.64	-1.01	1.02e-07	3.93e-06	yes	down	K04077	groEL, HSPD1	path:ko03018;path:ko04212;path:ko04940;path:ko05134;path:ko05152
c70692_g1	6.97	28.65	2.02	1.03e-07	3.95e-06	yes	up	K15190	MEPCE, BCDIN3	_
c38305_g1	29.46	4.06	-2.83	1.06e-07	4.07e-06	yes	down	K15015	SLC32A, VGAT	path:ko04721;path:ko04723;path:ko04727;path:ko05032;path:ko05033
c70167_g2	10.39	23.6	1.18	1.08e-07	4.14e-06	yes	up	_	_	_
c8347_g1	1.06	9.2	3	1.09e-07	4.18e-06	yes	up	_	_	_
c65776_g1	22.43	48.85	1.12	1.09e-07	4.18e-06	yes	up	_	_	_
c65411_g1	2.9	24.26	3.02	1.12e-07	4.29e-06	yes	up	_	_	_
c108713_g1	27.06	12.25	-1.14	1.13e-07	4.31e-06	yes	down	_	_	_
c64474_g1	0.18	2.24	3.08	1.16e-07	4.42e-06	yes	up	_	_	_
c60840_g1	2.01	8.56	2.03	1.17e-07	4.47e-06	yes	up	_	_	_
c63590_g1	22.75	45.89	1.01	1.18e-07	4.47e-06	yes	up	_	_	_
c69066_g1	3.07	6.98	1.16	1.2e-07	4.54e-06	yes	up	_	_	_
c8599_g1	45.57	85.11	0.9	1.2e-07	4.56e-06	no	up	_	_	_
c68952_g4	2.27	11.15	2.25	1.23e-07	4.65e-06	yes	up	_	_	_
c66882_g1	49.59	19.08	-1.37	1.23e-07	4.68e-06	yes	down	K09273	UBTF	_
c63152_g1	7.08	18.01	1.33	1.25e-07	4.75e-06	yes	up	K09841	ABA2	path:ko00906;path:ko01100;path:ko01110
c68728_g1	25.17	51.56	1.03	1.27e-07	4.81e-06	yes	up	_	_	_
c48279_g1	16.5	31.16	0.91	1.29e-07	4.86e-06	no	up	_	_	_
c65793_g2	0.13	1.62	2.92	1.29e-07	4.87e-06	yes	up	_	_	_
c52911_g1	0	0.53	2.66	1.33e-07	5.02e-06	yes	up	K10704	UBE2V	_
c65829_g2	7.67	18.28	1.24	1.34e-07	5.05e-06	yes	up	_	_	_
c70494_g1	1.25	5.64	2.09	1.37e-07	5.13e-06	yes	up	_	_	_
c86830_g1	0.39	2.18	2.22	1.38e-07	5.17e-06	yes	up	_	_	_
c60661_g1	8.75	2.42	-1.81	1.38e-07	5.18e-06	yes	down	K18848	IAMT1	_
c69347_g2	0.04	1.09	3.12	1.4e-07	5.25e-06	yes	up	_	_	_
c40066_g1	0.53	4.51	2.87	1.42e-07	5.31e-06	yes	up	_	_	_
c23929_g1	0.07	0.96	2.66	1.42e-07	5.32e-06	yes	up	_	_	_
c66381_g3	1.25	6.67	2.32	1.43e-07	5.34e-06	yes	up	_	_	_
c63216_g1	3.84	12.3	1.65	1.46e-07	5.47e-06	yes	up	_	_	_
c66427_g1	0.56	1.94	1.62	1.5e-07	5.58e-06	yes	up	_	_	_
c68790_g2	2.78	12.05	2.08	1.5e-07	5.61e-06	yes	up	_	_	_
c67484_g1	0.47	4.14	2.89	1.58e-07	5.88e-06	yes	up	_	_	_
c70133_g1	1.06	4.66	2.04	1.59e-07	5.9e-06	yes	up	K00306	PIPOX	path:ko00260;path:ko00310;path:ko01100;path:ko04146
c51664_g1	29.15	13.82	-1.07	1.6e-07	5.94e-06	yes	down	K19001	HELLS, DDM1	_
c15208_g1	0	0.88	3.29	1.6e-07	5.94e-06	yes	up	_	_	_
c67456_g1	1.96	11.81	2.53	1.61e-07	5.98e-06	yes	up	K13496	UGT73C	path:ko01110
c28115_g1	1.47	0.05	-3.35	1.63e-07	6.05e-06	yes	down	_	_	_
c69951_g2	3.04	11.26	1.85	1.63e-07	6.05e-06	yes	up	_	_	_
c108686_g1	103.14	238.68	1.21	1.64e-07	6.07e-06	yes	up	K02721	psbW	path:ko00195;path:ko01100
c37784_g1	21.45	43.06	1	1.65e-07	6.09e-06	yes	up	_	_	_
c61754_g1	282.24	157.53	-0.84	1.66e-07	6.13e-06	no	down	K11253	H3	path:ko05034;path:ko05202;path:ko05322
c66450_g3	15.53	32.74	1.07	1.67e-07	6.14e-06	yes	up	_	_	_
c94523_g1	46.45	8.46	-2.44	1.68e-07	6.2e-06	yes	down	K14638	SLC15A3_4, PHT	_
c57970_g1	76.92	36.85	-1.06	1.69e-07	6.21e-06	yes	down	_	_	_
c45508_g1	104.45	49.55	-1.07	1.72e-07	6.31e-06	yes	down	K03116	tatA	path:ko03060;path:ko03070
c62239_g1	7.02	29.58	2.06	1.73e-07	6.36e-06	yes	up	K02721	psbW	path:ko00195;path:ko01100
c43455_g1	0.76	3.98	2.24	1.74e-07	6.37e-06	yes	up	_	_	_
c64761_g1	0.28	2.11	2.53	1.74e-07	6.39e-06	yes	up	K09840	NCED	path:ko00906;path:ko01100;path:ko01110
c49783_g1	0.03	1.32	3.5	1.75e-07	6.41e-06	yes	up	_	_	_
c68051_g4	7.81	1.36	-2.44	1.77e-07	6.46e-06	yes	down	_	_	_
c57659_g1	11.17	25.64	1.19	1.81e-07	6.6e-06	yes	up	_	_	_
c64818_g1	0.33	2.14	2.4	1.81e-07	6.61e-06	yes	up	_	_	_
c70015_g2	8.2	15.87	0.94	1.83e-07	6.66e-06	no	up	_	_	_
c71695_g1	0.53	3.62	2.57	1.83e-07	6.69e-06	yes	up	_	_	_
c71697_g2	4.52	13.19	1.52	1.87e-07	6.79e-06	yes	up	_	_	_
c68137_g1	18.76	9.97	-0.9	1.89e-07	6.87e-06	no	down	_	_	_
c36709_g1	0.75	0.01	-2.89	1.91e-07	6.94e-06	yes	down	_	_	_
c59378_g1	0	0.43	2.42	1.92e-07	6.96e-06	yes	up	_	_	_
c47601_g1	0.08	2.01	3.54	2e-07	7.26e-06	yes	up	_	_	_
c64075_g1	18.38	37.32	1.02	2e-07	7.26e-06	yes	up	K14638	SLC15A3_4, PHT	_
c69110_g1	1.09	4.75	2.03	2.02e-07	7.32e-06	yes	up	_	_	_
c68808_g1	9.39	30.26	1.68	2.05e-07	7.41e-06	yes	up	_	_	_
c52354_g1	11.35	23.63	1.05	2.05e-07	7.41e-06	yes	up	_	_	_
c44033_g1	0.23	3.41	3.43	2.08e-07	7.5e-06	yes	up	_	_	_
c65497_g1	7.65	2.58	-1.53	2.08e-07	7.51e-06	yes	down	K00748	lpxB	path:ko00540;path:ko01100
c20782_g1	1.01	0	-3.47	2.09e-07	7.51e-06	yes	down	_	_	_
c69789_g7	125.28	66.69	-0.91	2.12e-07	7.64e-06	no	down	_	_	_
c71478_g1	1.6	3.04	0.89	2.14e-07	7.7e-06	no	up	K04733	IRAK4	path:ko04064;path:ko04620;path:ko04722;path:ko05133;path:ko05140;path:ko05142;path:ko05145;path:ko05152;path:ko05162;path:ko05164
c68868_g1	0.3	2.14	2.49	2.17e-07	7.78e-06	yes	up	_	_	_
c101302_g1	38.99	75.9	0.96	2.17e-07	7.8e-06	no	up	_	_	_
c53265_g1	0.53	0.03	-2.23	2.19e-07	7.84e-06	yes	down	K10760	IPT	path:ko00908;path:ko01100;path:ko01110
c10240_g1	1.31	6.67	2.26	2.26e-07	8.08e-06	yes	up	_	_	_
c64879_g1	0.51	2.87	2.28	2.27e-07	8.13e-06	yes	up	_	_	_
c39731_g1	0	22.78	7.84	2.32e-07	8.3e-06	yes	up	K00430	E1.11.1.7	path:ko00940;path:ko01100;path:ko01110
c58204_g1	36.35	73.33	1.01	2.38e-07	8.51e-06	yes	up	K09667	OGT	path:ko00514;path:ko04931
c71623_g2	18.94	34.94	0.88	2.39e-07	8.54e-06	no	up	_	_	_
c47427_g1	0.14	4.98	4.39	2.41e-07	8.59e-06	yes	up	K00430	E1.11.1.7	path:ko00940;path:ko01100;path:ko01110
c68354_g6	15.91	32.84	1.04	2.46e-07	8.77e-06	yes	up	K03549	kup	_
c60744_g1	0.24	9.73	4.85	2.47e-07	8.77e-06	yes	up	_	_	_
c31962_g1	0	0.21	1.59	2.47e-07	8.77e-06	yes	up	_	_	_
c71313_g1	14.74	27.81	0.91	2.51e-07	8.9e-06	no	up	_	_	_
c71674_g1	0.12	1.31	2.7	2.51e-07	8.91e-06	yes	up	_	_	_
c67186_g3	25.77	9.37	-1.45	2.55e-07	9.04e-06	yes	down	_	_	_
c81339_g1	0	2.07	4.44	2.55e-07	9.04e-06	yes	up	_	_	_
c69295_g2	4.3	0.6	-2.65	2.59e-07	9.16e-06	yes	down	_	_	_
c58404_g1	76.42	428.01	2.48	2.6e-07	9.18e-06	yes	up	_	_	_
c45352_g1	0.39	3.94	3.05	2.62e-07	9.26e-06	yes	up	_	_	_
c16511_g1	29.74	73.61	1.3	2.63e-07	9.26e-06	yes	up	_	_	_
c63189_g2	522.25	962.1	0.88	2.63e-07	9.28e-06	no	up	K01602	rbcS	path:ko00630;path:ko00710;path:ko01100;path:ko01120;path:ko01200
c7529_g1	0.19	2.52	3.16	2.66e-07	9.35e-06	yes	up	_	_	_
c53847_g3	17.37	4.92	-1.8	2.66e-07	9.35e-06	yes	down	_	_	_
c61194_g1	0.22	1.65	2.46	2.75e-07	9.68e-06	yes	up	_	_	_
c53904_g1	22.93	46.11	1	2.78e-07	9.76e-06	yes	up	_	_	_
c57203_g1	0	0.82	3.2	2.79e-07	9.79e-06	yes	up	K01051	E3.1.1.11	path:ko00040;path:ko00500;path:ko01100
c44779_g1	0.11	4.08	4.29	2.8e-07	9.81e-06	yes	up	_	_	_
c42465_g1	0.59	4.9	2.86	2.8e-07	9.82e-06	yes	up	_	_	_
c53111_g1	0.17	1.34	2.44	2.81e-07	9.83e-06	yes	up	K00547	mmuM	path:ko00270;path:ko01100;path:ko01110
c70814_g4	6.99	17.77	1.33	2.87e-07	1e-05	yes	up	K00826	E2.6.1.42, ilvE	path:ko00270;path:ko00280;path:ko00290;path:ko00770;path:ko01100;path:ko01110;path:ko01130;path:ko01210;path:ko01230
c68182_g5	1.95	0.3	-2.35	2.93e-07	1.02e-05	yes	down	_	_	_
c55352_g1	8.95	18.98	1.08	2.94e-07	1.02e-05	yes	up	K10666	RNF5	path:ko04141
c40186_g1	0.14	2.52	3.43	2.96e-07	1.03e-05	yes	up	_	_	_
c56183_g1	0.92	6.17	2.63	2.97e-07	1.03e-05	yes	up	_	_	_
c56766_g3	25.69	10.87	-1.23	3.02e-07	1.05e-05	yes	down	K17471	SULTR3	_
c69930_g6	21.02	7.14	-1.54	3.04e-07	1.06e-05	yes	down	_	_	_
c56360_g1	0.06	1.29	3.15	3.07e-07	1.07e-05	yes	up	_	_	_
c43643_g1	99.88	53.26	-0.91	3.08e-07	1.07e-05	no	down	K01689	ENO, eno	path:ko00010;path:ko00680;path:ko01100;path:ko01110;path:ko01120;path:ko01130;path:ko01200;path:ko01230;path:ko03018;path:ko04066
c65606_g2	10.63	4.53	-1.21	3.09e-07	1.07e-05	yes	down	_	_	_
c71866_g3	0.55	4.25	2.74	3.12e-07	1.08e-05	yes	up	_	_	_
c64602_g1	1071.98	2195.21	1.03	3.12e-07	1.08e-05	yes	up	K08770	UBC	path:ko03320
c45977_g1	0.06	0.78	2.45	3.13e-07	1.08e-05	yes	up	_	_	_
c61594_g1	0.56	3.16	2.31	3.19e-07	1.1e-05	yes	up	_	_	_
c102696_g1	2.3	0.05	-4	3.2e-07	1.1e-05	yes	down	_	_	_
c57685_g2	0	0.89	3.3	3.24e-07	1.12e-05	yes	up	K13508	GPAT	path:ko00561;path:ko00564;path:ko01100;path:ko01110
c36802_g1	1.01	3.98	1.88	3.26e-07	1.12e-05	yes	up	K08332	VAC8	path:ko04140
c63279_g1	10.01	24.89	1.31	3.26e-07	1.12e-05	yes	up	_	_	_
c15775_g1	0	0.55	2.69	3.28e-07	1.13e-05	yes	up	_	_	_
c61432_g1	4.37	10.33	1.22	3.29e-07	1.13e-05	yes	up	_	_	_
c57007_g2	0	3.04	4.97	3.33e-07	1.14e-05	yes	up	K09422	MYBP	_
c67279_g2	5.59	12.17	1.11	3.44e-07	1.18e-05	yes	up	_	_	_
c71620_g1	23.55	47.56	1.01	3.48e-07	1.19e-05	yes	up	_	_	_
c71005_g1	7.24	28.74	1.97	3.52e-07	1.2e-05	yes	up	_	_	_
c56047_g2	15.36	39.65	1.36	3.66e-07	1.25e-05	yes	up	_	_	_
c66919_g2	0.28	1.75	2.26	3.67e-07	1.25e-05	yes	up	K01051	E3.1.1.11	path:ko00040;path:ko00500;path:ko01100
c68242_g1	0.08	3.64	4.35	3.68e-07	1.25e-05	yes	up	_	_	_
c69874_g3	0.65	4.2	2.53	3.71e-07	1.26e-05	yes	up	_	_	_
c69841_g4	0	0.55	2.7	3.71e-07	1.26e-05	yes	up	_	_	_
c58078_g1	8.39	1.42	-2.48	3.72e-07	1.27e-05	yes	down	_	_	_
c30707_g1	43.69	82.69	0.92	3.73e-07	1.27e-05	no	up	_	_	_
c23299_g1	22.91	9.26	-1.3	3.75e-07	1.27e-05	yes	down	_	_	_
c56369_g1	173.97	83.22	-1.06	3.78e-07	1.28e-05	yes	down	_	_	_
c64893_g2	11.83	2.4	-2.26	3.83e-07	1.3e-05	yes	down	_	_	_
c71137_g4	96.73	51.31	-0.91	3.87e-07	1.31e-05	no	down	_	_	_
c71211_g4	3.38	0.64	-2.24	3.93e-07	1.33e-05	yes	down	K10406	KIFC2_3	_
c43465_g1	52.28	104.18	0.99	4e-07	1.35e-05	no	up	_	_	_
c67703_g2	104.37	48.55	-1.1	4.06e-07	1.37e-05	yes	down	_	_	_
c108616_g1	84.66	45.23	-0.9	4.18e-07	1.41e-05	no	down	K15414	C1QBP	path:ko05168
c67618_g5	3.55	14.15	1.97	4.19e-07	1.41e-05	yes	up	K14488	SAUR	path:ko04075
c67859_g2	14.54	5.58	-1.37	4.19e-07	1.41e-05	yes	down	_	_	_
c8379_g1	0.12	2.16	3.37	4.21e-07	1.42e-05	yes	up	_	_	_
c38369_g1	230.55	121.08	-0.93	4.23e-07	1.42e-05	no	down	K11294	NCL, NSR1	path:ko05130
c79930_g1	21.5	44.93	1.06	4.24e-07	1.43e-05	yes	up	_	_	_
c63991_g1	23.5	11.4	-1.04	4.25e-07	1.43e-05	yes	down	K00995	pgsA, PGS1	path:ko00564;path:ko01100
c34574_g2	1.36	14.91	3.36	4.27e-07	1.43e-05	yes	up	_	_	_
c68171_g1	23.58	9.99	-1.23	4.3e-07	1.44e-05	yes	down	_	_	_
c65577_g1	0	1.12	3.6	4.3e-07	1.44e-05	yes	up	_	_	_
c36773_g1	6.33	1.83	-1.73	4.34e-07	1.45e-05	yes	down	K15113	SLC25A28_37, MFRN	_
c69211_g2	13.56	6.05	-1.15	4.35e-07	1.45e-05	yes	down	_	_	_
c71691_g2	0.18	1.22	2.26	4.36e-07	1.46e-05	yes	up	_	_	_
c69038_g2	60.88	32.76	-0.89	4.37e-07	1.46e-05	no	down	_	_	_
c36485_g1	13.35	4.57	-1.53	4.43e-07	1.48e-05	yes	down	_	_	_
c69598_g5	23.09	47.36	1.03	4.46e-07	1.48e-05	yes	up	_	_	_
c62444_g2	11.78	37.95	1.68	4.52e-07	1.5e-05	yes	up	_	_	_
c72430_g1	83.2	150.35	0.85	4.53e-07	1.5e-05	no	up	_	_	_
c56721_g1	10.94	23.56	1.1	4.56e-07	1.52e-05	yes	up	K07305	msrB	_
c67592_g1	0.53	6.09	3.3	4.59e-07	1.52e-05	yes	up	K01114	plcC	path:ko00562;path:ko00564;path:ko00565;path:ko01100;path:ko01110;path:ko04919
c67087_g7	1.64	130.51	6.23	4.59e-07	1.52e-05	yes	up	_	_	_
c57357_g1	13.22	36.59	1.46	4.68e-07	1.55e-05	yes	up	_	_	_
c65245_g1	9.89	1.96	-2.28	4.72e-07	1.56e-05	yes	down	_	_	_
c67601_g1	1.08	5.93	2.35	4.8e-07	1.59e-05	yes	up	K01183	E3.2.1.14	path:ko00520;path:ko01100
c55561_g1	1.19	0.15	-2.36	4.86e-07	1.6e-05	yes	down	_	_	_
c55411_g2	7.72	17.48	1.17	4.88e-07	1.61e-05	yes	up	_	_	_
c45401_g1	0.84	8.07	3.12	4.88e-07	1.61e-05	yes	up	_	_	_
c96112_g1	1.82	0	-4.27	5.03e-07	1.66e-05	yes	down	_	_	_
c30900_g1	2.87	0.68	-1.93	5.06e-07	1.67e-05	yes	down	_	_	_
c70498_g1	9.13	3.5	-1.36	5.11e-07	1.68e-05	yes	down	_	_	_
c65034_g1	0.08	1.47	3.09	5.12e-07	1.68e-05	yes	up	_	_	_
c69835_g1	0.67	3.07	2.04	5.16e-07	1.69e-05	yes	up	K14638	SLC15A3_4, PHT	_
c7520_g1	17.21	35.54	1.04	5.16e-07	1.69e-05	yes	up	_	_	_
c26093_g1	0.11	1.34	2.78	5.17e-07	1.69e-05	yes	up	_	_	_
c60588_g1	3.65	0.3	-3.23	5.21e-07	1.71e-05	yes	down	_	_	_
c52288_g1	25.9	9.88	-1.38	5.22e-07	1.71e-05	yes	down	_	_	_
c70502_g4	33.39	15.89	-1.07	5.22e-07	1.71e-05	yes	down	_	_	_
c27475_g1	24.53	72.35	1.56	5.25e-07	1.71e-05	yes	up	_	_	_
c66506_g2	0.76	4.51	2.43	5.26e-07	1.72e-05	yes	up	K14486	K14486, ARF	path:ko04075
c38889_g1	0.03	0.66	2.57	5.27e-07	1.72e-05	yes	up	_	_	_
c27406_g2	11.47	4.16	-1.44	5.28e-07	1.72e-05	yes	down	_	_	_
c68702_g1	3.08	14.11	2.16	5.4e-07	1.76e-05	yes	up	K01568	E4.1.1.1, pdc	path:ko00010;path:ko01100;path:ko01110;path:ko01130
c26088_g1	21.53	46.97	1.12	5.6e-07	1.82e-05	yes	up	_	_	_
c58933_g3	1.72	11.05	2.62	5.63e-07	1.83e-05	yes	up	_	_	_
c24202_g1	0.62	0.05	-2.27	5.74e-07	1.86e-05	yes	down	_	_	_
c41762_g1	1.37	16.23	3.47	5.84e-07	1.89e-05	yes	up	_	_	_
c20723_g1	0	3.53	5.18	5.86e-07	1.9e-05	yes	up	_	_	_
c94273_g1	1.13	7.04	2.54	5.89e-07	1.91e-05	yes	up	_	_	_
c62568_g1	0	0.79	3.15	5.99e-07	1.94e-05	yes	up	K01514	PRUNE, PPX1	path:ko00230
c49992_g1	38.08	127.44	1.74	5.99e-07	1.94e-05	yes	up	K03113	EIF1, SUI1	path:ko03013
c68279_g1	12.19	22.36	0.87	6.05e-07	1.96e-05	no	up	_	_	_
c66506_g1	0.49	3.22	2.49	6.13e-07	1.98e-05	yes	up	_	_	_
c67127_g1	12.23	24.2	0.98	6.13e-07	1.98e-05	no	up	_	_	_
c53828_g2	101.53	328.19	1.69	6.17e-07	1.99e-05	yes	up	K08059	IFI30, GILT	path:ko04612
c26086_g1	314.26	168.91	-0.9	6.21e-07	2e-05	no	down	_	_	_
c36120_g1	0.04	1.77	3.74	6.27e-07	2.02e-05	yes	up	_	_	_
c67843_g1	1.77	7.78	2.07	6.31e-07	2.03e-05	yes	up	K03327	TC.MATE, SLC47A, norM, mdtK, dinF	_
c63847_g1	0	1.03	3.49	6.43e-07	2.06e-05	yes	up	_	_	_
c61826_g2	1.9	18.01	3.18	6.48e-07	2.08e-05	yes	up	_	_	_
c64624_g2	10.43	27.8	1.41	6.5e-07	2.08e-05	yes	up	_	_	_
c55322_g1	17.98	8.22	-1.12	6.51e-07	2.08e-05	yes	down	_	_	_
c27521_g1	10.69	5.02	-1.07	6.55e-07	2.09e-05	yes	down	_	_	_
c67981_g2	89.38	175.14	0.97	6.64e-07	2.12e-05	no	up	_	_	_
c67719_g1	41.23	76.81	0.9	6.66e-07	2.13e-05	no	up	K17285	SELENBP1	_
c57382_g1	1.07	17.79	3.93	6.76e-07	2.16e-05	yes	up	_	_	_
c67647_g1	22	5.79	-1.91	6.9e-07	2.2e-05	yes	down	K14826	FPR3_4	_
c31534_g1	0.78	5.98	2.79	6.9e-07	2.2e-05	yes	up	K07375	TUBB	path:ko04145;path:ko04540;path:ko05130
c62670_g1	0.26	18.4	5.68	6.9e-07	2.2e-05	yes	up	K08241	E2.1.1.141	path:ko00592;path:ko01110
c64780_g1	120	45.89	-1.38	7e-07	2.23e-05	yes	down	_	_	_
c67561_g1	0	0.64	2.88	7.03e-07	2.23e-05	yes	up	K00423	E1.10.3.3	path:ko00053;path:ko01100
c61621_g4	1.98	10.15	2.3	7.03e-07	2.23e-05	yes	up	_	_	_
c57428_g2	26.5	51.47	0.96	7.03e-07	2.23e-05	no	up	K07304	msrA	_
c28877_g1	17.44	34.22	0.97	7.12e-07	2.26e-05	no	up	_	_	_
c68879_g3	1.65	0.19	-2.6	7.18e-07	2.27e-05	yes	down	_	_	_
c33356_g2	0	5.2	5.73	7.25e-07	2.29e-05	yes	up	_	_	_
c16121_g1	29.81	67.36	1.17	7.25e-07	2.29e-05	yes	up	_	_	_
c11397_g1	0.02	0.42	2.07	7.32e-07	2.31e-05	yes	up	_	_	_
c44938_g1	17.14	50.85	1.56	7.35e-07	2.32e-05	yes	up	K05765	CFL	path:ko04360;path:ko04666;path:ko04810;path:ko05133
c86938_g1	13.24	4.7	-1.48	7.46e-07	2.35e-05	yes	down	K14492	ARR-A	path:ko04075
c34896_g1	1.47	0.14	-2.73	7.48e-07	2.36e-05	yes	down	_	_	_
c21660_g1	6.28	20.98	1.73	7.49e-07	2.36e-05	yes	up	_	_	_
c39048_g1	2.41	9.54	1.94	7.49e-07	2.36e-05	yes	up	K00454	LOX2S	path:ko00591;path:ko00592;path:ko01100;path:ko01110
c71383_g1	13.82	26.6	0.94	7.51e-07	2.36e-05	no	up	_	_	_
c47921_g1	0	1.61	4.1	7.59e-07	2.38e-05	yes	up	_	_	_
c61826_g3	1.46	13.99	3.17	7.65e-07	2.4e-05	yes	up	_	_	_
c69847_g1	0.42	2.2	2.16	7.7e-07	2.41e-05	yes	up	_	_	_
c41377_g1	17.38	30.92	0.83	7.8e-07	2.44e-05	no	up	K01280	TPP2	_
c30909_g1	19.63	35.34	0.85	7.81e-07	2.44e-05	no	up	_	_	_
c70130_g1	0.05	0.72	2.43	7.86e-07	2.46e-05	yes	up	_	_	_
c68305_g4	15.96	1.32	-3.5	7.87e-07	2.46e-05	yes	down	_	_	_
c59606_g1	62.5	31.36	-0.99	7.89e-07	2.46e-05	no	down	_	_	_
c70211_g1	13.95	30.33	1.12	7.96e-07	2.48e-05	yes	up	_	_	_
c27111_g1	0.19	3.4	3.6	8.05e-07	2.51e-05	yes	up	_	_	_
c54831_g2	50.77	25.27	-1	8.11e-07	2.52e-05	yes	down	K14505	CYCD3	path:ko04075
c41654_g1	4.4	10.37	1.22	8.24e-07	2.56e-05	yes	up	_	_	_
c67126_g4	0.06	3.11	4.31	8.26e-07	2.57e-05	yes	up	K00799	GST, gst	path:ko00480;path:ko00980;path:ko00982;path:ko05204
c47056_g1	66.48	24.2	-1.45	8.33e-07	2.59e-05	yes	down	K01610	E4.1.1.49, pckA	path:ko00010;path:ko00020;path:ko00620;path:ko00710;path:ko01100;path:ko01110;path:ko01120;path:ko01130;path:ko01200
c69049_g2	1	0.09	-2.52	8.44e-07	2.62e-05	yes	down	_	_	_
c27041_g1	0.5	4.26	2.86	8.44e-07	2.62e-05	yes	up	_	_	_
c20505_g1	0.27	3.07	3.1	8.48e-07	2.63e-05	yes	up	_	_	_
c59856_g4	0.3	2.63	2.77	8.53e-07	2.64e-05	yes	up	K07192	FLOT	path:ko04910
c48376_g1	0	5.03	5.68	8.55e-07	2.64e-05	yes	up	K15634	gpmB	path:ko00010;path:ko00260;path:ko00680;path:ko01100;path:ko01110;path:ko01120;path:ko01130;path:ko01200;path:ko01230
c63652_g3	20.39	38.42	0.91	8.71e-07	2.69e-05	no	up	K11584	PPP2R5	path:ko03015;path:ko04071;path:ko04113;path:ko04114;path:ko04151;path:ko04152;path:ko04261;path:ko04728
c67943_g5	15.21	5.03	-1.58	8.73e-07	2.7e-05	yes	down	K02537	MAD2	path:ko04110;path:ko04111;path:ko04113;path:ko04114;path:ko04914;path:ko05166
c65290_g1	11.38	3.24	-1.78	8.9e-07	2.75e-05	yes	down	_	_	_
c70998_g1	1.99	13.41	2.7	9.08e-07	2.8e-05	yes	up	K01188	E3.2.1.21	path:ko00460;path:ko00500;path:ko00940;path:ko01100;path:ko01110
c52926_g2	22.77	54.96	1.27	9.09e-07	2.8e-05	yes	up	_	_	_
c62690_g1	0.2	1.93	2.77	9.16e-07	2.82e-05	yes	up	K14497	PP2C	path:ko04075;path:ko04931
c67316_g4	2.55	8.83	1.76	9.25e-07	2.85e-05	yes	up	K18886	GAMT2	_
c60732_g1	22.57	48.56	1.1	9.29e-07	2.86e-05	yes	up	_	_	_
c108645_g1	54.31	106.09	0.96	9.3e-07	2.86e-05	no	up	K11517	HAO	path:ko00630;path:ko01100;path:ko01110;path:ko01120;path:ko01130;path:ko01200;path:ko04146
c55619_g1	31.03	15.7	-0.98	9.32e-07	2.86e-05	no	down	K14494	DELLA	path:ko04075
c69626_g1	35.61	62.46	0.81	9.33e-07	2.86e-05	no	up	K00264	GLT1	path:ko00250;path:ko00910;path:ko01100;path:ko01110;path:ko01120;path:ko01130;path:ko01230
c65586_g1	37.16	66.06	0.83	9.41e-07	2.88e-05	no	up	_	_	_
c67211_g9	6.09	25.93	2.07	9.58e-07	2.93e-05	yes	up	_	_	_
c54640_g1	66.93	31.96	-1.06	9.66e-07	2.95e-05	yes	down	K11251	H2A	path:ko05034;path:ko05322
c69521_g4	2.51	0.18	-3.24	9.67e-07	2.95e-05	yes	down	K13963	SERPINB	path:ko05146
c71163_g3	0.09	1.06	2.61	9.67e-07	2.95e-05	yes	up	_	_	_
c69951_g1	2.57	8.7	1.72	9.73e-07	2.97e-05	yes	up	_	_	_
c87194_g1	28.28	14.5	-0.96	9.75e-07	2.97e-05	no	down	K02541	MCM3	path:ko03030;path:ko04110;path:ko04111;path:ko04113
c62119_g1	13.47	30.42	1.17	9.81e-07	2.99e-05	yes	up	K00232	E1.3.3.6, ACOX1, ACOX3	path:ko00071;path:ko00592;path:ko01040;path:ko01100;path:ko01110;path:ko01212;path:ko03320;path:ko04024;path:ko04146
c109968_g1	0.04	2	3.94	9.82e-07	2.99e-05	yes	up	K05349	bglX	path:ko00460;path:ko00500;path:ko00940;path:ko01100;path:ko01110
c63410_g1	52.32	28.89	-0.85	9.87e-07	3e-05	no	down	K00140	mmsA, iolA, ALDH6A1	path:ko00280;path:ko00410;path:ko00562;path:ko00640;path:ko01100;path:ko01200
c69467_g2	1.39	25.5	4.1	9.87e-07	3e-05	yes	up	K03517	nadA	path:ko00760;path:ko01100
c52895_g2	7.63	19.39	1.33	9.98e-07	3.03e-05	yes	up	_	_	_
c68887_g9	0.64	0.02	-2.67	1e-06	3.04e-05	yes	down	_	_	_
c66586_g1	13.02	26.08	1	1.01e-06	3.06e-05	no	up	K03549	kup	_
c70667_g3	29.31	62.02	1.08	1.01e-06	3.07e-05	yes	up	K00130	betB, gbsA	path:ko00260;path:ko01100
c39963_g2	0	0.35	2.18	1.02e-06	3.1e-05	yes	up	_	_	_
c70082_g1	0.75	2.38	1.54	1.03e-06	3.13e-05	yes	up	K14689	SLC30A2, ZNT2	_
c70122_g1	32.73	123.24	1.91	1.04e-06	3.15e-05	yes	up	_	_	_
c70395_g1	7.41	14.29	0.94	1.04e-06	3.15e-05	no	up	K17756	FAO3	_
c69038_g9	31.97	17.33	-0.88	1.05e-06	3.16e-05	no	down	K01940	argG, ASS1	path:ko00220;path:ko00250;path:ko01100;path:ko01110;path:ko01130;path:ko01230
c22553_g1	35.46	63.68	0.84	1.05e-06	3.18e-05	no	up	_	_	_
c50763_g1	16.03	7.87	-1.02	1.06e-06	3.2e-05	yes	down	_	_	_
c63750_g1	2.65	8.62	1.67	1.07e-06	3.21e-05	yes	up	_	_	_
c101963_g1	0.76	2.59	1.65	1.09e-06	3.26e-05	yes	up	_	_	_
c38194_g1	2.82	12.77	2.14	1.09e-06	3.27e-05	yes	up	K15397	KCS	path:ko00062;path:ko01110
c40531_g1	1.36	0.16	-2.51	1.11e-06	3.34e-05	yes	down	_	_	_
c61900_g1	14.99	27.23	0.86	1.13e-06	3.38e-05	no	up	K11262	ACACA	path:ko00061;path:ko00254;path:ko00620;path:ko00640;path:ko01100;path:ko01110;path:ko01212;path:ko04152;path:ko04910;path:ko04922
c40634_g1	122.32	239.32	0.97	1.14e-06	3.42e-05	no	up	_	_	_
c67695_g1	0.74	5.87	2.82	1.15e-06	3.44e-05	yes	up	_	_	_
c28823_g1	122.37	252.35	1.04	1.15e-06	3.44e-05	yes	up	_	_	_
c45084_g3	37.52	117.65	1.65	1.16e-06	3.47e-05	yes	up	_	_	_
c102639_g1	0.01	0.43	2.24	1.18e-06	3.54e-05	yes	up	K13422	MYC2	path:ko04075
c70523_g2	8.45	1.62	-2.31	1.2e-06	3.59e-05	yes	down	K01322	PREP	path:ko04614
c46609_g1	50.35	25.81	-0.96	1.21e-06	3.6e-05	no	down	_	_	_
c50137_g2	11.59	44.56	1.93	1.22e-06	3.63e-05	yes	up	_	_	_
c70616_g11	133.27	68.26	-0.96	1.22e-06	3.63e-05	no	down	K11253	H3	path:ko05034;path:ko05202;path:ko05322
c62534_g1	4.63	12.27	1.39	1.23e-06	3.67e-05	yes	up	_	_	_
c58662_g2	0.07	1.7	3.45	1.23e-06	3.67e-05	yes	up	K00799	GST, gst	path:ko00480;path:ko00980;path:ko00982;path:ko05204
c63884_g1	1.34	8.78	2.62	1.24e-06	3.67e-05	yes	up	_	_	_
c27110_g1	65.16	35.83	-0.86	1.24e-06	3.67e-05	no	down	K14565	NOP58	path:ko03008
c67465_g1	28.65	67	1.22	1.25e-06	3.72e-05	yes	up	_	_	_
c69996_g1	5.12	21.18	2.03	1.26e-06	3.72e-05	yes	up	_	_	_
c16046_g1	776.85	1559.15	1	1.26e-06	3.74e-05	yes	up	_	_	_
c54730_g3	0.05	0.89	2.76	1.26e-06	3.74e-05	yes	up	_	_	_
c59594_g1	0.19	2.81	3.31	1.26e-06	3.74e-05	yes	up	K13449	PR1	path:ko04075;path:ko04626
c55693_g1	1.7	5.26	1.57	1.27e-06	3.75e-05	yes	up	_	_	_
c5832_g1	0.06	2.53	4	1.27e-06	3.75e-05	yes	up	_	_	_
c63804_g1	107.34	192.51	0.84	1.27e-06	3.75e-05	no	up	K10144	RCHY1, PIRH2	path:ko04115;path:ko04120;path:ko05162
c70192_g3	4.51	10.88	1.25	1.31e-06	3.86e-05	yes	up	_	_	_
c59972_g1	0.02	0.97	3.1	1.32e-06	3.89e-05	yes	up	_	_	_
c55125_g1	5.26	12.27	1.21	1.33e-06	3.93e-05	yes	up	_	_	_
c66189_g1	0	0.43	2.41	1.35e-06	3.96e-05	yes	up	K13508	GPAT	path:ko00561;path:ko00564;path:ko01100;path:ko01110
c63109_g2	18.94	8.05	-1.22	1.35e-06	3.96e-05	yes	down	_	_	_
c105983_g1	0.02	2.32	4.3	1.35e-06	3.98e-05	yes	up	_	_	_
c67865_g1	56.95	28.6	-0.99	1.37e-06	4.01e-05	no	down	K09422	MYBP	_
c71029_g6	30.18	13.92	-1.11	1.37e-06	4.03e-05	yes	down	_	_	_
c63353_g1	0.02	1.13	3.35	1.38e-06	4.04e-05	yes	up	_	_	_
c64186_g1	1.1	0.14	-2.34	1.4e-06	4.09e-05	yes	down	_	_	_
c72344_g1	22.53	9.95	-1.17	1.41e-06	4.12e-05	yes	down	_	_	_
c8583_g1	43.63	21.81	-1	1.42e-06	4.16e-05	no	down	K01802	E5.2.1.8	_
c54313_g1	1.54	12.76	2.97	1.43e-06	4.17e-05	yes	up	K13680	CSLA	_
c68466_g1	62.93	110.32	0.81	1.43e-06	4.17e-05	no	up	_	_	_
c69414_g4	0.18	1.23	2.25	1.44e-06	4.2e-05	yes	up	K14497	PP2C	path:ko04075;path:ko04931
c63165_g1	2.65	0.52	-2.15	1.48e-06	4.31e-05	yes	down	_	_	_
c50068_g1	15.51	30.56	0.97	1.48e-06	4.31e-05	no	up	_	_	_
c64230_g1	3.22	0.44	-2.62	1.49e-06	4.34e-05	yes	down	_	_	_
c59473_g3	0.31	2.56	2.69	1.5e-06	4.35e-05	yes	up	_	_	_
c71932_g1	20.21	39.39	0.96	1.51e-06	4.38e-05	no	up	_	_	_
c68486_g1	0.17	1.17	2.24	1.51e-06	4.38e-05	yes	up	_	_	_
c70007_g4	38.04	19.06	-0.99	1.53e-06	4.45e-05	no	down	K00939	adk, AK	path:ko00230;path:ko01100;path:ko01110;path:ko01130
c70381_g4	238.44	127.82	-0.9	1.56e-06	4.51e-05	no	down	K11251	H2A	path:ko05034;path:ko05322
c60647_g1	1.53	5.8	1.85	1.58e-06	4.56e-05	yes	up	_	_	_
c64658_g1	0	0.35	2.18	1.59e-06	4.6e-05	yes	up	_	_	_
c86972_g1	15.62	7.51	-1.05	1.61e-06	4.65e-05	yes	down	_	_	_
c66665_g2	19.7	3.33	-2.53	1.62e-06	4.67e-05	yes	down	_	_	_
c57882_g1	0.59	2.87	2.11	1.62e-06	4.69e-05	yes	up	_	_	_
c72270_g1	0.96	3.61	1.8	1.64e-06	4.74e-05	yes	up	_	_	_
c37509_g2	3.69	0.82	-2.04	1.64e-06	4.74e-05	yes	down	K06911	K06911	_
c69518_g2	34.09	39.19	0.2	1.65e-06	4.74e-05	no	up	K00763	pncB, NAPRT1	path:ko00760;path:ko01100
c74289_g1	4.4	13.72	1.62	1.65e-06	4.75e-05	yes	up	_	_	_
c87951_g1	0	2.3	4.58	1.65e-06	4.75e-05	yes	up	K00422	E1.10.3.1	path:ko00350;path:ko00950;path:ko01100;path:ko01110
c27109_g1	36.41	65.46	0.84	1.67e-06	4.8e-05	no	up	_	_	_
c54768_g1	10.4	2.91	-1.81	1.67e-06	4.8e-05	yes	down	_	_	_
c67977_g4	9.88	20.95	1.08	1.67e-06	4.8e-05	yes	up	_	_	_
c1757_g1	25.76	13.13	-0.97	1.68e-06	4.81e-05	no	down	K12608	CAF16	path:ko03018
c51176_g1	1.28	5.66	2.06	1.71e-06	4.89e-05	yes	up	_	_	_
c27062_g1	0	1.79	4.24	1.72e-06	4.92e-05	yes	up	_	_	_
c55201_g2	1.17	4.37	1.82	1.73e-06	4.94e-05	yes	up	_	_	_
c40951_g1	10.28	18.72	0.86	1.73e-06	4.96e-05	no	up	K12118	CRY1	path:ko04712
c53754_g3	0.31	2.41	2.61	1.74e-06	4.98e-05	yes	up	K18342	OTUD6	_
c68215_g1	0	0.74	3.01	1.75e-06	4.98e-05	yes	up	_	_	_
c71339_g3	1.57	0.19	-2.53	1.76e-06	5.02e-05	yes	down	_	_	_
c39512_g2	0.23	3.21	3.33	1.77e-06	5.04e-05	yes	up	_	_	_
c28505_g2	0.4	8.03	4.03	1.78e-06	5.07e-05	yes	up	_	_	_
c62459_g2	0.05	1.74	3.6	1.8e-06	5.11e-05	yes	up	_	_	_
c60247_g1	0.06	1.34	3.15	1.82e-06	5.18e-05	yes	up	K13508	GPAT	path:ko00561;path:ko00564;path:ko01100;path:ko01110
c67502_g1	1.22	0.12	-2.57	1.83e-06	5.19e-05	yes	down	_	_	_
c57055_g1	0	3.4	5.13	1.83e-06	5.2e-05	yes	up	K15634	gpmB	path:ko00010;path:ko00260;path:ko00680;path:ko01100;path:ko01110;path:ko01120;path:ko01130;path:ko01200;path:ko01230
c69107_g1	1.53	13.06	3.02	1.84e-06	5.21e-05	yes	up	_	_	_
c57158_g1	146.34	80.95	-0.85	1.84e-06	5.21e-05	no	down	K03146	THI4, THI1	path:ko00730;path:ko01100
c68289_g1	29.08	57.75	0.99	1.85e-06	5.24e-05	no	up	K00855	PRK, prkB	path:ko00710;path:ko01100;path:ko01120;path:ko01200
c23979_g1	0.19	2.71	3.27	1.86e-06	5.26e-05	yes	up	_	_	_
c67529_g1	5.16	10.78	1.05	1.87e-06	5.27e-05	yes	up	_	_	_
c66933_g1	6.84	18.64	1.43	1.87e-06	5.27e-05	yes	up	_	_	_
c72368_g1	34.88	16.82	-1.05	1.88e-06	5.3e-05	yes	down	_	_	_
c68315_g6	0.03	1.13	3.22	1.88e-06	5.31e-05	yes	up	K12356	UGT72E	path:ko00940
c70649_g2	10.99	1.49	-2.8	1.88e-06	5.31e-05	yes	down	_	_	_
c71123_g2	8.65	19.83	1.19	1.9e-06	5.35e-05	yes	up	K01592	E4.1.1.25	path:ko00350;path:ko00950;path:ko01100;path:ko01110
c69485_g1	17.81	31.87	0.84	1.93e-06	5.43e-05	no	up	K01662	dxs	path:ko00730;path:ko00900;path:ko01100;path:ko01110;path:ko01130
c52388_g1	206.34	677.56	1.71	1.94e-06	5.45e-05	yes	up	_	_	_
c27146_g1	30.42	16.21	-0.9	1.95e-06	5.48e-05	no	down	K02209	MCM5, CDC46	path:ko03030;path:ko04110;path:ko04111;path:ko04113
c52961_g1	0.15	2.49	3.38	1.97e-06	5.52e-05	yes	up	_	_	_
c56433_g1	38.7	20.97	-0.88	1.99e-06	5.58e-05	no	down	K01792	E5.1.3.15	path:ko00010;path:ko01100;path:ko01110;path:ko01120;path:ko01130
c67824_g5	10.41	22.53	1.11	1.99e-06	5.59e-05	yes	up	_	_	_
c58888_g1	4.99	17.78	1.81	2.03e-06	5.68e-05	yes	up	_	_	_
c79520_g1	81.51	41	-0.99	2.04e-06	5.71e-05	no	down	K02978	RP-S27e, RPS27	path:ko03010
c61065_g1	3.31	24.27	2.84	2.04e-06	5.71e-05	yes	up	K16292	CEP, CYSEP	_
c64965_g2	4.32	12.48	1.51	2.08e-06	5.81e-05	yes	up	_	_	_
c55105_g2	0	1.23	3.73	2.11e-06	5.89e-05	yes	up	_	_	_
c68148_g4	8.32	17.27	1.04	2.12e-06	5.91e-05	yes	up	_	_	_
c57132_g1	0.95	6.25	2.6	2.13e-06	5.95e-05	yes	up	_	_	_
c22554_g1	8.62	2.54	-1.72	2.14e-06	5.96e-05	yes	down	_	_	_
c18626_g1	0.01	0.29	1.79	2.15e-06	6e-05	yes	up	_	_	_
c114986_g1	0.27	6.01	4.06	2.17e-06	6.04e-05	yes	up	_	_	_
c64948_g1	2.37	5.48	1.17	2.19e-06	6.08e-05	yes	up	_	_	_
c88796_g1	0.38	1.95	2.09	2.19e-06	6.09e-05	yes	up	K15078	SLX1	path:ko03460
c60464_g1	7.06	1.5	-2.16	2.2e-06	6.1e-05	yes	down	K09285	OVM, ANT	_
c65205_g1	0.09	1.25	2.79	2.2e-06	6.11e-05	yes	up	_	_	_
c70805_g2	9.46	3.76	-1.31	2.21e-06	6.14e-05	yes	down	_	_	_
c54764_g3	1.82	8.71	2.2	2.23e-06	6.18e-05	yes	up	_	_	_
c50120_g1	0.5	6.52	3.46	2.23e-06	6.18e-05	yes	up	_	_	_
c20607_g1	23.45	41.71	0.83	2.25e-06	6.22e-05	no	up	K08515	VAMP7	path:ko04130
c80634_g1	0.56	2.37	1.9	2.25e-06	6.22e-05	yes	up	_	_	_
c34930_g1	13.6	26.55	0.96	2.25e-06	6.22e-05	no	up	_	_	_
c70468_g1	0.23	2.5	3	2.26e-06	6.24e-05	yes	up	_	_	_
c66798_g2	48.55	21.36	-1.18	2.28e-06	6.29e-05	yes	down	_	_	_
c68784_g1	0.1	0.91	2.33	2.3e-06	6.33e-05	yes	up	_	_	_
c67097_g1	25.41	53.32	1.07	2.3e-06	6.33e-05	yes	up	_	_	_
c94553_g1	3.39	15.07	2.12	2.3e-06	6.34e-05	yes	up	K15397	KCS	path:ko00062;path:ko01110
c52787_g1	41.22	22.37	-0.88	2.32e-06	6.39e-05	no	down	K14191	DIM1	_
c57912_g1	0.01	0.3	1.84	2.36e-06	6.5e-05	yes	up	_	_	_
c108669_g1	33.27	64.52	0.95	2.39e-06	6.58e-05	no	up	K10576	UBE2H, UBC8	path:ko04120
c66927_g6	1.08	5.29	2.19	2.41e-06	6.61e-05	yes	up	_	_	_
c58698_g1	0	0.57	2.74	2.42e-06	6.63e-05	yes	up	_	_	_
c60209_g1	3.23	20.41	2.62	2.43e-06	6.67e-05	yes	up	_	_	_
c65851_g3	14.74	32.73	1.15	2.46e-06	6.73e-05	yes	up	_	_	_
c63994_g1	3.16	0.52	-2.39	2.47e-06	6.76e-05	yes	down	_	_	_
c57265_g1	0.68	3.55	2.22	2.47e-06	6.77e-05	yes	up	_	_	_
c4590_g1	4.96	13.41	1.42	2.48e-06	6.78e-05	yes	up	_	_	_
c66644_g2	14.72	26.25	0.83	2.49e-06	6.81e-05	no	up	K00703	E2.4.1.21, glgA	path:ko00500;path:ko01100;path:ko01110
c40099_g1	100.26	53.65	-0.9	2.53e-06	6.91e-05	no	down	_	_	_
c28816_g1	3.43	15.67	2.16	2.55e-06	6.94e-05	yes	up	K01166	E3.1.27.1	_
c21641_g1	91.11	36.4	-1.32	2.55e-06	6.94e-05	yes	down	_	_	_
c46855_g2	0.29	8.39	4.45	2.58e-06	7.03e-05	yes	up	_	_	_
c34876_g1	11.09	26.91	1.27	2.6e-06	7.08e-05	yes	up	_	_	_
c68736_g2	0.56	2.56	2.02	2.61e-06	7.09e-05	yes	up	K09843	E1.14.13.93	path:ko00906
c56492_g1	2.93	0.58	-2.16	2.64e-06	7.17e-05	yes	down	K09419	HSFF	_
c70667_g6	323.05	184.52	-0.81	2.67e-06	7.26e-05	no	down	K01689	ENO, eno	path:ko00010;path:ko00680;path:ko01100;path:ko01110;path:ko01120;path:ko01130;path:ko01200;path:ko01230;path:ko03018;path:ko04066
c70291_g2	58.42	30.26	-0.95	2.68e-06	7.26e-05	no	down	K14505	CYCD3	path:ko04075
c69331_g1	167.83	94.3	-0.83	2.69e-06	7.28e-05	no	down	K03626	EGD2, NACA	_
c41899_g1	0.16	1.92	2.98	2.69e-06	7.28e-05	yes	up	_	_	_
c59689_g1	0.01	0.9	3.22	2.69e-06	7.28e-05	yes	up	K11816	YUCCA	path:ko00380;path:ko01100
c68385_g1	17.5	9.32	-0.9	2.69e-06	7.28e-05	no	down	_	_	_
c54896_g1	2.24	8.23	1.83	2.71e-06	7.34e-05	yes	up	_	_	_
c50204_g1	14.78	6.31	-1.21	2.75e-06	7.42e-05	yes	down	_	_	_
c25739_g1	0.02	0.78	2.91	2.75e-06	7.43e-05	yes	up	_	_	_
c53789_g1	25.2	53.27	1.08	2.75e-06	7.43e-05	yes	up	_	_	_
c66950_g1	67.63	117.58	0.8	2.76e-06	7.43e-05	no	up	K09286	EREBP	_
c69482_g1	97.39	54.7	-0.83	2.76e-06	7.43e-05	no	down	K06943	NOG1	path:ko03008
c66880_g1	9.67	24.34	1.32	2.78e-06	7.47e-05	yes	up	K13691	SGT1	_
c60024_g1	26.74	46.59	0.8	2.78e-06	7.47e-05	no	up	_	_	_
c66526_g1	0	1.6	4.09	2.79e-06	7.5e-05	yes	up	_	_	_
c69177_g6	10.38	19	0.87	2.79e-06	7.5e-05	no	up	_	_	_
c66715_g1	0	1.32	3.82	2.8e-06	7.51e-05	yes	up	K01728	pel	path:ko00040
c69664_g2	23.77	46.47	0.96	2.83e-06	7.59e-05	no	up	_	_	_
c55803_g2	37.8	15.47	-1.28	2.84e-06	7.62e-05	yes	down	K09680	coaW	path:ko00770;path:ko01100
c66646_g7	0.15	1.87	3	2.86e-06	7.66e-05	yes	up	_	_	_
c94399_g1	8.58	3.04	-1.47	2.86e-06	7.66e-05	yes	down	_	_	_
c70108_g1	0.71	2.63	1.75	2.87e-06	7.67e-05	yes	up	_	_	_
c68739_g1	7.87	21.6	1.45	2.87e-06	7.68e-05	yes	up	_	_	_
c63111_g2	16	44.39	1.47	2.89e-06	7.71e-05	yes	up	_	_	_
c4803_g1	35.03	18.88	-0.89	2.89e-06	7.73e-05	no	down	_	_	_
c61235_g1	0.02	1.16	3.39	2.9e-06	7.73e-05	yes	up	_	_	_
c24974_g2	6.49	1.64	-1.92	2.91e-06	7.75e-05	yes	down	_	_	_
c69664_g4	27.79	53.42	0.94	2.91e-06	7.75e-05	no	up	_	_	_
c36828_g1	29.36	56.22	0.93	2.95e-06	7.85e-05	no	up	K16904	DCTPP1	path:ko00240;path:ko01100
c30315_g2	1.32	6.64	2.25	2.96e-06	7.86e-05	yes	up	K14638	SLC15A3_4, PHT	_
c60955_g1	0.55	4.83	2.92	2.96e-06	7.88e-05	yes	up	_	_	_
c69961_g7	0.05	0.73	2.44	2.97e-06	7.9e-05	yes	up	_	_	_
c61646_g2	3.7	9.69	1.37	3e-06	7.97e-05	yes	up	_	_	_
c29612_g1	0.02	0.54	2.37	3.01e-06	7.97e-05	yes	up	_	_	_
c68688_g1	17.43	43.38	1.31	3.01e-06	7.99e-05	yes	up	K04688	RPS6KB	path:ko04012;path:ko04066;path:ko04150;path:ko04151;path:ko04152;path:ko04211;path:ko04212;path:ko04213;path:ko04350;path:ko04666;path:ko04910;path:ko04931;path:ko05205;path:ko05221;path:ko05231
c51407_g2	0.08	1.45	3.1	3.03e-06	8.02e-05	yes	up	K00430	E1.11.1.7	path:ko00940;path:ko01100;path:ko01110
c63095_g1	12.36	5.72	-1.1	3.07e-06	8.13e-05	yes	down	K09832	CYP710A	path:ko00100;path:ko01100;path:ko01110
c70820_g1	0.09	2.27	3.64	3.08e-06	8.16e-05	yes	up	_	_	_
c94014_g1	0	0.51	2.6	3.12e-06	8.25e-05	yes	up	_	_	_
c86963_g1	0.76	21.04	4.61	3.13e-06	8.26e-05	yes	up	_	_	_
c104943_g1	1.81	0.08	-3.38	3.15e-06	8.31e-05	yes	down	_	_	_
c49240_g1	44.15	79.87	0.85	3.15e-06	8.32e-05	no	up	_	_	_
c50662_g1	0.03	0.46	2.14	3.16e-06	8.32e-05	yes	up	_	_	_
c30684_g1	15.49	31.11	1	3.21e-06	8.45e-05	yes	up	_	_	_
c10268_g1	0.42	4.28	3.08	3.21e-06	8.45e-05	yes	up	_	_	_
c44018_g1	0	0.98	3.44	3.25e-06	8.55e-05	yes	up	_	_	_
c62588_g1	14.56	26.26	0.85	3.26e-06	8.56e-05	no	up	K17506	PPM1L, PP2CE	_
c67194_g6	8.6	16.28	0.91	3.27e-06	8.6e-05	no	up	_	_	_
c66473_g1	10.38	20.14	0.95	3.29e-06	8.62e-05	no	up	_	_	_
c56705_g1	33.29	12.93	-1.36	3.29e-06	8.62e-05	yes	down	K08235	E2.4.1.207	_
c61348_g1	6.05	1.95	-1.58	3.29e-06	8.62e-05	yes	down	_	_	_
c58736_g1	0.69	4.14	2.43	3.31e-06	8.67e-05	yes	up	_	_	_
c66775_g1	3.24	0.07	-4.26	3.34e-06	8.75e-05	yes	down	K01051	E3.1.1.11	path:ko00040;path:ko00500;path:ko01100
c66407_g3	0.16	1.43	2.55	3.36e-06	8.79e-05	yes	up	_	_	_
c24140_g1	0.76	15.9	4.21	3.38e-06	8.82e-05	yes	up	_	_	_
c22775_g1	0.09	0.88	2.36	3.38e-06	8.83e-05	yes	up	_	_	_
c43012_g3	0.42	3.86	2.93	3.38e-06	8.83e-05	yes	up	K01183	E3.2.1.14	path:ko00520;path:ko01100
c39750_g1	1.83	21.91	3.51	3.39e-06	8.85e-05	yes	up	K15404	K15404, CER1	path:ko00073;path:ko01110
c50769_g1	0.22	1.96	2.7	3.39e-06	8.85e-05	yes	up	_	_	_
c65621_g3	0.25	1.99	2.6	3.4e-06	8.86e-05	yes	up	_	_	_
c53273_g2	0.03	0.3	1.62	3.44e-06	8.95e-05	yes	up	_	_	_
c36827_g1	11.75	4.11	-1.49	3.46e-06	8.99e-05	yes	down	_	_	_
c61914_g1	0.09	0.92	2.39	3.46e-06	8.99e-05	yes	up	K09873	TIP	_
c38009_g1	0.08	1.49	3.16	3.47e-06	9.01e-05	yes	up	_	_	_
c67217_g1	1.96	0.3	-2.35	3.47e-06	9.01e-05	yes	down	_	_	_
c63591_g2	15.3	8.02	-0.92	3.49e-06	9.06e-05	no	down	_	_	_
c33246_g1	0.12	2.23	3.41	3.5e-06	9.08e-05	yes	up	_	_	_
c94529_g1	7.16	2.69	-1.38	3.53e-06	9.15e-05	yes	down	_	_	_
c49848_g1	0.01	0.59	2.6	3.54e-06	9.17e-05	yes	up	_	_	_
c59294_g2	0.07	1.36	3.1	3.54e-06	9.17e-05	yes	up	K01051	E3.1.1.11	path:ko00040;path:ko00500;path:ko01100
c60511_g2	0.08	1.26	2.95	3.55e-06	9.17e-05	yes	up	_	_	_
c16390_g1	2.01	0.09	-3.46	3.56e-06	9.19e-05	yes	down	_	_	_
c95737_g1	0.47	2.67	2.29	3.56e-06	9.19e-05	yes	up	_	_	_
c63577_g1	0.79	7.77	3.15	3.58e-06	9.23e-05	yes	up	_	_	_
c59674_g1	0.1	0.93	2.36	3.6e-06	9.27e-05	yes	up	K09571	FKBP4_5	path:ko04915
c42135_g1	0.68	5.06	2.72	3.6e-06	9.27e-05	yes	up	_	_	_
c58703_g1	13.04	26.09	0.99	3.63e-06	9.35e-05	no	up	_	_	_
c57671_g1	12.57	25.05	0.99	3.64e-06	9.37e-05	no	up	_	_	_
c29286_g1	0.18	1.75	2.71	3.65e-06	9.37e-05	yes	up	_	_	_
c24618_g1	0.77	0	-3.12	3.66e-06	9.4e-05	yes	down	_	_	_
c47802_g1	12.49	3.24	-1.92	3.71e-06	9.53e-05	yes	down	_	_	_
c70325_g1	16.12	28.53	0.82	3.71e-06	9.53e-05	no	up	_	_	_
c94665_g1	1.6	0.17	-2.67	3.72e-06	9.53e-05	yes	down	_	_	_
c56057_g1	4.26	11.93	1.47	3.72e-06	9.53e-05	yes	up	_	_	_
c71094_g2	0.17	1.97	2.95	3.74e-06	9.56e-05	yes	up	_	_	_
c32362_g2	0.04	1.48	3.51	3.74e-06	9.56e-05	yes	up	K08912	LHCB1	path:ko00196;path:ko01100
c57874_g2	0.23	1.64	2.41	3.74e-06	9.57e-05	yes	up	_	_	_
c71522_g3	22.93	38.18	0.73	3.8e-06	9.72e-05	no	up	K18368	CSE	path:ko00940;path:ko01100;path:ko01110
c62003_g2	0.19	2.42	3.14	3.83e-06	9.77e-05	yes	up	_	_	_
c44388_g1	136.28	72.43	-0.91	3.83e-06	9.77e-05	no	down	_	_	_
c69796_g3	40.34	17.51	-1.2	3.83e-06	9.77e-05	yes	down	_	_	_
c69039_g1	55.65	101.22	0.86	3.85e-06	9.82e-05	no	up	_	_	_
c70668_g1	18.34	10.32	-0.82	3.86e-06	9.83e-05	no	down	_	_	_
c8467_g1	26.84	3.15	-3.05	3.87e-06	9.84e-05	yes	down	_	_	_
c26477_g2	4.45	0.96	-2.11	3.87e-06	9.84e-05	yes	down	K09588	CYP90A1, CPD	path:ko00905;path:ko01110
c59584_g1	0	1.83	4.27	3.88e-06	9.85e-05	yes	up	_	_	_
c43710_g1	0	0.29	1.96	3.91e-06	9.92e-05	yes	up	_	_	_
c66175_g2	159.67	290.81	0.86	3.92e-06	9.94e-05	no	up	_	_	_
c62521_g1	2.93	0.37	-2.68	3.92e-06	9.95e-05	yes	down	_	_	_
c54248_g1	7.48	0.09	-5.33	3.99e-06	0.000101	yes	down	_	_	_
c57339_g1	12.08	22.47	0.89	4e-06	0.000101	no	up	K17616	CTDSPL2	_
c63600_g1	11.05	20.62	0.89	4.01e-06	0.000101	no	up	_	_	_
c70783_g5	281.12	636.2	1.18	4.04e-06	0.000102	yes	up	K01177	E3.2.1.2	path:ko00500;path:ko01100
c58225_g2	13.58	28.39	1.06	4.05e-06	0.000102	yes	up	_	_	_
c108833_g1	88.21	152.15	0.79	4.05e-06	0.000102	no	up	K12382	PSAP, SGP1	path:ko04142
c72530_g1	19.2	7.7	-1.31	4.07e-06	0.000103	yes	down	_	_	_
c63845_g1	0.12	1.32	2.7	4.1e-06	0.000103	yes	up	_	_	_
c54385_g1	1.08	0.12	-2.44	4.16e-06	0.000105	yes	down	K10526	OPCL1	path:ko00592;path:ko01100;path:ko01110
c33004_g1	0.38	0.01	-2.12	4.2e-06	0.000106	yes	down	_	_	_
c67555_g5	1.81	8.85	2.23	4.2e-06	0.000106	yes	up	_	_	_
c66479_g1	23.05	43.23	0.9	4.21e-06	0.000106	no	up	_	_	_
c71271_g1	0.54	17.7	4.79	4.23e-06	0.000106	yes	up	_	_	_
c11641_g1	0.51	2.56	2.11	4.24e-06	0.000107	yes	up	_	_	_
c34184_g2	3.29	7.95	1.25	4.27e-06	0.000107	yes	up	_	_	_
c8918_g1	0.64	0.02	-2.64	4.31e-06	0.000108	yes	down	_	_	_
c69532_g1	1.27	0.18	-2.28	4.37e-06	0.00011	yes	down	_	_	_
c48014_g1	0.32	2.92	2.84	4.39e-06	0.00011	yes	up	K16281	RHA1	_
c65866_g7	0.98	3.9	1.89	4.39e-06	0.00011	yes	up	_	_	_
c71886_g3	1.59	13.89	3.05	4.41e-06	0.00011	yes	up	K14431	TGA	path:ko04075
c63596_g2	18.47	32.89	0.83	4.42e-06	0.00011	no	up	_	_	_
c32626_g1	0.33	2	2.29	4.46e-06	0.000111	yes	up	_	_	_
c19817_g1	1.12	0.13	-2.42	4.48e-06	0.000112	yes	down	_	_	_
c68339_g5	0.7	3.45	2.14	4.5e-06	0.000112	yes	up	K08489	STX16	path:ko04130
c62752_g1	0.01	0.18	1.3	4.5e-06	0.000112	yes	up	_	_	_
c40292_g1	0.24	2.38	2.89	4.52e-06	0.000113	yes	up	_	_	_
c67971_g1	7.32	19.04	1.37	4.52e-06	0.000113	yes	up	_	_	_
c64093_g1	0.28	1.74	2.28	4.53e-06	0.000113	yes	up	K08235	E2.4.1.207	_
c64187_g5	2.89	7.23	1.29	4.57e-06	0.000114	yes	up	_	_	_
c46848_g1	0	0.23	1.72	4.59e-06	0.000114	yes	up	K14638	SLC15A3_4, PHT	_
c68015_g2	6.94	16.53	1.24	4.6e-06	0.000114	yes	up	_	_	_
c65685_g4	0	105.14	10.04	4.62e-06	0.000115	yes	up	_	_	_
c7022_g1	11.09	45.5	2.03	4.62e-06	0.000115	yes	up	_	_	_
c69864_g1	277.5	147.52	-0.91	4.63e-06	0.000115	no	down	_	_	_
c61318_g1	17.93	34.08	0.92	4.66e-06	0.000115	no	up	K01100	E3.1.3.37	path:ko00710;path:ko01100;path:ko01120;path:ko01200
c55431_g1	8.11	3.39	-1.23	4.68e-06	0.000116	yes	down	K11498	CENPE	_
c64263_g1	0.79	5.9	2.75	4.71e-06	0.000116	yes	up	_	_	_
c65486_g1	9.08	17.15	0.91	4.73e-06	0.000117	no	up	_	_	_
c69577_g1	11.82	27.22	1.2	4.73e-06	0.000117	yes	up	K03098	APOD	_
c49413_g2	16.54	9.32	-0.82	4.74e-06	0.000117	no	down	K03255	TIF31, CLU1	_
c38282_g1	0.01	1.04	3.39	4.76e-06	0.000117	yes	up	_	_	_
c61715_g1	8.38	21.52	1.35	4.77e-06	0.000118	yes	up	K12153	CYP79A2	path:ko00460;path:ko00966;path:ko01110;path:ko01210
c18578_g1	151.29	86.57	-0.8	4.79e-06	0.000118	no	down	K04078	groES, HSPE1	_
c70226_g1	16.58	30.96	0.9	4.8e-06	0.000118	no	up	_	_	_
c55448_g1	7.47	3.28	-1.16	4.81e-06	0.000118	yes	down	K10400	KIF15	_
c61526_g2	1.85	7.69	2	4.84e-06	0.000119	yes	up	K05907	APR	path:ko00920;path:ko01120
c45429_g1	0.19	1.51	2.48	4.85e-06	0.000119	yes	up	_	_	_
c57680_g2	0.26	1.69	2.33	4.86e-06	0.000119	yes	up	K01183	E3.2.1.14	path:ko00520;path:ko01100
c60109_g1	83.09	150.74	0.86	4.89e-06	0.00012	no	up	K01580	E4.1.1.15, gadB, gadA, GAD	path:ko00250;path:ko00410;path:ko00430;path:ko00650;path:ko01100;path:ko01110;path:ko04727;path:ko04940
c65846_g1	26.43	50.89	0.94	4.91e-06	0.00012	no	up	K02113	ATPF1D, atpH	path:ko00190;path:ko00195;path:ko01100
c58300_g1	26.76	13.73	-0.96	4.91e-06	0.00012	no	down	_	_	_
c69170_g2	48.86	25.3	-0.95	4.91e-06	0.00012	no	down	K03164	TOP2	_
c69500_g1	1.16	0.2	-2.08	4.92e-06	0.00012	yes	down	_	_	_
c38413_g1	12.68	4.75	-1.4	4.96e-06	0.000121	yes	down	K05658	ABCB1	path:ko02010;path:ko04976;path:ko05206
c53406_g1	122.22	208.36	0.77	4.96e-06	0.000121	no	up	_	_	_
c68744_g1	3.92	0.96	-1.93	4.97e-06	0.000122	yes	down	_	_	_
c51901_g1	149.91	275.42	0.88	5.08e-06	0.000124	no	up	_	_	_
c2763_g1	44.98	85.91	0.93	5.11e-06	0.000124	no	up	_	_	_
c70300_g1	19.07	37.19	0.96	5.11e-06	0.000124	no	up	_	_	_
c31529_g1	0.6	0.04	-2.37	5.16e-06	0.000126	yes	down	_	_	_
c10150_g1	0	2.24	4.55	5.17e-06	0.000126	yes	up	_	_	_
c66399_g1	5.42	21.3	1.95	5.18e-06	0.000126	yes	up	_	_	_
c32324_g1	1.03	6.81	2.62	5.22e-06	0.000127	yes	up	K00108	betA, CHDH	path:ko00260;path:ko01100
c7853_g1	155.29	75.47	-1.04	5.23e-06	0.000127	yes	down	_	_	_
c64792_g2	345.5	196.77	-0.81	5.24e-06	0.000127	no	down	K02894	RP-L23e, RPL23	path:ko03010
c68733_g2	30.47	15.3	-0.99	5.28e-06	0.000128	no	down	K08900	BCS1	_
c57873_g1	42.63	76.01	0.83	5.31e-06	0.000129	no	up	K00167	BCKDHB, bkdA2	path:ko00280;path:ko00640;path:ko01100;path:ko01110;path:ko01130
c10107_g1	0.22	2.23	2.85	5.33e-06	0.000129	yes	up	_	_	_
c67916_g1	4.21	10.56	1.31	5.36e-06	0.00013	yes	up	_	_	_
c5256_g1	17.3	33.24	0.94	5.38e-06	0.00013	no	up	K07904	RAB11A	path:ko04144;path:ko04961;path:ko04962;path:ko04972
c44532_g1	18.88	56.55	1.58	5.42e-06	0.000131	yes	up	_	_	_
c26899_g2	2.73	7.74	1.47	5.45e-06	0.000132	yes	up	_	_	_
c60761_g1	0.05	0.75	2.47	5.46e-06	0.000132	yes	up	_	_	_
c70671_g1	5.1	11.7	1.18	5.46e-06	0.000132	yes	up	_	_	_
c68489_g3	0.08	1.04	2.67	5.48e-06	0.000132	yes	up	K08911	LHCA5	path:ko00196
c47200_g1	0.01	0.37	2.08	5.53e-06	0.000133	yes	up	_	_	_
c61168_g1	0.09	0.89	2.39	5.6e-06	0.000135	yes	up	_	_	_
c66854_g1	0.25	1.24	1.93	5.62e-06	0.000135	yes	up	_	_	_
c57531_g1	2.13	0.27	-2.6	5.67e-06	0.000136	yes	down	_	_	_
c68116_g2	4.65	9.62	1.03	5.7e-06	0.000137	yes	up	_	_	_
c71749_g1	0.87	7.94	3.05	5.7e-06	0.000137	yes	up	K13407	CYP94A1	path:ko00073
c67254_g1	7.02	15.91	1.17	5.7e-06	0.000137	yes	up	_	_	_
c26617_g1	60.09	112.08	0.9	5.77e-06	0.000138	no	up	K04035	E1.14.13.81, acsF, chlE	path:ko00860;path:ko01100;path:ko01110
c59802_g2	16.24	29.85	0.87	5.81e-06	0.000139	no	up	_	_	_
c57022_g1	23.77	41.45	0.8	5.82e-06	0.000139	no	up	K03189	ureG	_
c69961_g2	7.51	20.38	1.43	5.82e-06	0.000139	yes	up	_	_	_
c71049_g1	16.35	8.7	-0.9	5.84e-06	0.00014	no	down	K00770	E2.4.2.24	path:ko00500;path:ko00520;path:ko01100
c13734_g1	0.01	0.32	1.99	5.91e-06	0.000141	yes	up	_	_	_
c65940_g2	73.35	42.58	-0.78	6.02e-06	0.000144	no	down	K01728	pel	path:ko00040
c66278_g1	17.41	8.05	-1.1	6.06e-06	0.000145	yes	down	_	_	_
c67438_g1	9.19	17.02	0.88	6.11e-06	0.000146	no	up	_	_	_
c60511_g4	0.37	2.1	2.23	6.15e-06	0.000147	yes	up	_	_	_
c70390_g3	26.84	7.38	-1.85	6.2e-06	0.000148	yes	down	_	_	_
c69873_g1	57.86	155.74	1.43	6.22e-06	0.000148	yes	up	_	_	_
c86957_g1	31.24	54.2	0.79	6.26e-06	0.000149	no	up	K14432	ABF	path:ko04075
c49370_g1	42.43	14.74	-1.52	6.3e-06	0.00015	yes	down	K09273	UBTF	_
c76122_g1	4.33	0.28	-3.55	6.36e-06	0.000151	yes	down	_	_	_
c10510_g1	109.57	61.41	-0.83	6.38e-06	0.000152	no	down	K15040	VDAC2	path:ko04020;path:ko04022;path:ko05012;path:ko05016;path:ko05166
c62179_g1	14.5	25.29	0.8	6.45e-06	0.000153	no	up	_	_	_
c49646_g1	25.77	13.79	-0.9	6.51e-06	0.000155	no	down	_	_	_
c60974_g1	9.09	3.83	-1.23	6.55e-06	0.000156	yes	down	_	_	_
c66294_g1	0.19	1.43	2.38	6.58e-06	0.000156	yes	up	_	_	_
c28739_g1	12.78	26.12	1.03	6.86e-06	0.000163	yes	up	_	_	_
c37092_g1	2.49	8.33	1.7	6.89e-06	0.000163	yes	up	_	_	_
c45979_g2	185.61	318.43	0.78	6.93e-06	0.000164	no	up	K00134	GAPDH, gapA	path:ko00010;path:ko00710;path:ko01100;path:ko01110;path:ko01120;path:ko01130;path:ko01200;path:ko01230;path:ko04066;path:ko05010
c27462_g3	0	0.17	1.45	6.94e-06	0.000164	yes	up	_	_	_
c38350_g1	0.05	0.68	2.37	6.94e-06	0.000164	yes	up	_	_	_
c57181_g1	81.1	46.85	-0.79	6.94e-06	0.000164	no	down	K11294	NCL, NSR1	path:ko05130
c68981_g1	0.28	1.96	2.45	6.99e-06	0.000165	yes	up	_	_	_
c43643_g2	53.55	29.29	-0.87	7.1e-06	0.000168	no	down	K11131	DKC1, NOLA4, CBF5	path:ko03008
c56495_g1	0	3.81	5.29	7.11e-06	0.000168	yes	up	_	_	_
c574_g1	0.05	1.54	3.4	7.13e-06	0.000168	yes	up	_	_	_
c65552_g2	12	34.44	1.51	7.23e-06	0.00017	yes	up	_	_	_
c69697_g1	9.52	18.45	0.95	7.26e-06	0.000171	no	up	_	_	_
c62444_g1	14.24	45.18	1.66	7.26e-06	0.000171	yes	up	_	_	_
c64045_g1	0.28	1.32	1.9	7.26e-06	0.000171	yes	up	_	_	_
c2402_g1	13.7	4.55	-1.57	7.29e-06	0.000171	yes	down	_	_	_
c47962_g2	0.04	0.67	2.46	7.3e-06	0.000171	yes	up	K14972	PAXIP1, PTIP	_
c68182_g6	1.55	0.2	-2.47	7.39e-06	0.000173	yes	down	_	_	_
c64049_g1	14.63	29.89	1.03	7.39e-06	0.000173	yes	up	_	_	_
c65753_g1	0.08	0.79	2.34	7.44e-06	0.000174	yes	up	_	_	_
c68315_g5	0.08	1.98	3.5	7.53e-06	0.000176	yes	up	K12356	UGT72E	path:ko00940
c58246_g1	0.04	0.9	2.87	7.54e-06	0.000176	yes	up	_	_	_
c64151_g1	0.11	0.83	2.16	7.57e-06	0.000177	yes	up	_	_	_
c50445_g1	0	3.81	5.29	7.57e-06	0.000177	yes	up	_	_	_
c27360_g1	10.7	5.5	-0.95	7.58e-06	0.000177	no	down	_	_	_
c67676_g1	1.53	5.34	1.74	7.6e-06	0.000177	yes	up	K15400	HHT1	path:ko00073
c69633_g1	12.88	24.27	0.91	7.84e-06	0.000183	no	up	_	_	_
c58679_g1	4.51	11.63	1.35	7.9e-06	0.000184	yes	up	K14484	IAA	path:ko04075
c65220_g1	6.1	12.21	0.99	7.95e-06	0.000185	no	up	_	_	_
c47277_g2	7.36	16.7	1.17	8.01e-06	0.000187	yes	up	_	_	_
c69674_g3	22.09	36.38	0.72	8.02e-06	0.000187	no	up	K03875	SKP2, FBXL1	path:ko04068;path:ko04110;path:ko04120;path:ko05168;path:ko05169;path:ko05200;path:ko05203;path:ko05222
c68618_g1	1.97	6.48	1.67	8.06e-06	0.000188	yes	up	_	_	_
c64911_g1	5.35	12.98	1.26	8.07e-06	0.000188	yes	up	_	_	_
c66732_g1	153.88	89.19	-0.79	8.1e-06	0.000188	no	down	K15404	K15404, CER1	path:ko00073;path:ko01110
c61164_g3	33.92	65.28	0.94	8.1e-06	0.000188	no	up	K17279	REEP5_6	_
c70390_g4	6.5	15.69	1.26	8.13e-06	0.000189	yes	up	_	_	_
c41792_g2	0.05	0.53	2.09	8.18e-06	0.00019	yes	up	_	_	_
c88397_g1	0.94	0.02	-3.08	8.2e-06	0.00019	yes	down	_	_	_
c63751_g1	38.35	16	-1.26	8.25e-06	0.000191	yes	down	K14709	SLC39A1_2_3, ZIP1_2_3	_
c18600_g1	111.24	61.71	-0.85	8.3e-06	0.000192	no	down	K11251	H2A	path:ko05034;path:ko05322
c69498_g8	0	0.74	3.07	8.3e-06	0.000192	yes	up	K07437	CYP26A	path:ko00830;path:ko01100
c66446_g1	29.31	14.85	-0.98	8.35e-06	0.000193	no	down	_	_	_
c62221_g1	9.06	16.74	0.88	8.35e-06	0.000193	no	up	K18758	DIS3L2	_
c57442_g1	16.92	35.32	1.06	8.46e-06	0.000195	yes	up	_	_	_
c68985_g1	2.31	0.15	-3.27	8.56e-06	0.000198	yes	down	K01728	pel	path:ko00040
c70281_g1	2.21	6.45	1.51	8.66e-06	0.0002	yes	up	_	_	_
c71124_g2	52.69	104.04	0.98	8.67e-06	0.0002	no	up	_	_	_
c58470_g1	0.05	2.11	3.92	8.67e-06	0.0002	yes	up	K05605	HIBCH	path:ko00280;path:ko00410;path:ko00640;path:ko01100;path:ko01200
c30997_g1	18.3	9.18	-0.99	8.74e-06	0.000201	no	down	_	_	_
c60086_g1	0.04	0.34	1.7	8.76e-06	0.000202	yes	up	_	_	_
c70555_g1	132.81	444.79	1.74	8.83e-06	0.000203	yes	up	_	_	_
c65479_g3	1.82	0.32	-2.19	8.86e-06	0.000204	yes	down	K13148	CPSF3L, INTS11	_
c94183_g1	3.52	10.53	1.55	8.92e-06	0.000205	yes	up	K09338	HD-ZIP	_
c34351_g1	0.02	0.65	2.65	8.97e-06	0.000206	yes	up	_	_	_
c65881_g1	165.06	288.7	0.81	9.11e-06	0.000209	no	up	_	_	_
c71055_g1	0.43	2.83	2.46	9.12e-06	0.000209	yes	up	_	_	_
c102027_g1	13.08	24.1	0.88	9.14e-06	0.000209	no	up	_	_	_
c63682_g1	0.64	4.22	2.54	9.14e-06	0.000209	yes	up	_	_	_
c69900_g7	0.02	1.1	3.31	9.17e-06	0.00021	yes	up	_	_	_
c23183_g1	6.79	12.44	0.86	9.22e-06	0.000211	no	up	_	_	_
c39853_g1	1.75	0.28	-2.28	9.29e-06	0.000212	yes	down	_	_	_
c60828_g1	12.1	21.23	0.81	9.34e-06	0.000213	no	up	_	_	_
c35967_g1	427.08	241.95	-0.82	9.36e-06	0.000214	no	down	K02898	RP-L26e, RPL26	path:ko03010
c49221_g1	8.12	27.23	1.73	9.39e-06	0.000214	yes	up	_	_	_
c61806_g1	18.05	6.75	-1.4	9.43e-06	0.000215	yes	down	_	_	_
c62524_g3	1.44	3.86	1.36	9.44e-06	0.000215	yes	up	_	_	_
c60821_g1	2.24	7.41	1.68	9.45e-06	0.000215	yes	up	K17506	PPM1L, PP2CE	_
c69975_g4	1.49	4.94	1.66	9.65e-06	0.00022	yes	up	_	_	_
c70883_g1	113.87	242.2	1.09	9.68e-06	0.00022	yes	up	_	_	_
c33585_g1	9.12	3.16	-1.5	9.75e-06	0.000222	yes	down	_	_	_
c65290_g2	21.95	6.62	-1.71	9.82e-06	0.000223	yes	down	_	_	_
c63771_g3	51.85	29.42	-0.82	9.88e-06	0.000224	no	down	K01652	E2.2.1.6L, ilvB, ilvG, ilvI	path:ko00290;path:ko00650;path:ko00660;path:ko00770;path:ko01100;path:ko01110;path:ko01130;path:ko01210;path:ko01230
c44690_g1	11.68	23.45	1	9.92e-06	0.000225	no	up	_	_	_
c63181_g1	0.27	1.19	1.79	9.94e-06	0.000225	yes	up	_	_	_
c64572_g1	47.55	27.09	-0.81	9.96e-06	0.000226	no	down	K05929	E2.1.1.103, NMT	path:ko00564
c71570_g1	0.22	1.13	1.94	9.98e-06	0.000226	yes	up	_	_	_
c58331_g1	17.44	34.25	0.97	1.01e-05	0.000228	no	up	_	_	_
c54449_g2	3.27	10.42	1.64	1.01e-05	0.000229	yes	up	K00111	glpA, glpD	path:ko00564;path:ko01110
c68214_g5	10.4	3.97	-1.37	1.01e-05	0.000229	yes	down	_	_	_
c30630_g1	0	0.46	2.48	1.01e-05	0.000229	yes	up	_	_	_
c58483_g1	7.77	14.03	0.84	1.02e-05	0.000229	no	up	_	_	_
c67326_g2	35.54	59.97	0.75	1.03e-05	0.000233	no	up	_	_	_
c69439_g1	23.21	12.47	-0.89	1.03e-05	0.000233	no	down	_	_	_
c101294_g1	18.57	8.78	-1.07	1.04e-05	0.000233	yes	down	K02540	MCM2	path:ko03030;path:ko04110;path:ko04111;path:ko04113
c62333_g1	11.24	3.58	-1.62	1.04e-05	0.000235	yes	down	_	_	_
c44658_g1	0.22	1.96	2.67	1.05e-05	0.000237	yes	up	_	_	_
c59683_g1	10.52	4.68	-1.15	1.05e-05	0.000237	yes	down	_	_	_
c54194_g1	2.11	8.13	1.9	1.06e-05	0.000238	yes	up	_	_	_
c17017_g1	17.17	32.64	0.92	1.07e-05	0.000241	no	up	K14498	SNRK2	path:ko04075
c70867_g3	0	0.57	2.74	1.08e-05	0.000242	yes	up	_	_	_
c40502_g1	0.57	0	-2.75	1.08e-05	0.000242	yes	down	_	_	_
c71211_g3	1.52	0.25	-2.2	1.1e-05	0.000247	yes	down	K10406	KIFC2_3	_
c1289_g1	0.5	4.24	2.84	1.12e-05	0.000251	yes	up	_	_	_
c62047_g1	116.39	58.61	-0.99	1.12e-05	0.000251	no	down	_	_	_
c60987_g1	0.2	2.86	3.31	1.13e-05	0.000253	yes	up	_	_	_
c57047_g1	33.2	59.13	0.83	1.14e-05	0.000254	no	up	_	_	_
c60910_g1	2.03	8.56	2.02	1.14e-05	0.000255	yes	up	_	_	_
c79708_g1	1.48	6.25	2.01	1.14e-05	0.000255	yes	up	_	_	_
c47277_g1	1.04	3.52	1.66	1.16e-05	0.000258	yes	up	_	_	_
c64622_g2	12.68	30.02	1.24	1.17e-05	0.000262	yes	up	_	_	_
c38578_g1	72.25	35.35	-1.03	1.18e-05	0.000262	yes	down	_	_	_
c48538_g1	21.52	4.9	-2.11	1.18e-05	0.000263	yes	down	_	_	_
c61768_g1	9.91	40.1	2.01	1.18e-05	0.000264	yes	up	_	_	_
c62919_g1	0.55	0.02	-2.38	1.19e-05	0.000265	yes	down	_	_	_
c58320_g2	9.37	18.85	1	1.19e-05	0.000266	yes	up	_	_	_
c109073_g1	6.32	21.32	1.74	1.2e-05	0.000266	yes	up	_	_	_
c1935_g1	0.88	5.4	2.49	1.21e-05	0.000268	yes	up	_	_	_
c70874_g2	42.31	21.61	-0.97	1.21e-05	0.000269	no	down	K03768	PPIB, ppiB	_
c68879_g2	11.68	3.23	-1.82	1.21e-05	0.00027	yes	down	K01285	PRCP	path:ko04614;path:ko04974
c58328_g2	1.22	3.86	1.59	1.22e-05	0.00027	yes	up	_	_	_
c50443_g2	5.02	1.53	-1.65	1.23e-05	0.000272	yes	down	_	_	_
c70255_g1	5.43	12.57	1.2	1.23e-05	0.000273	yes	up	_	_	_
c21931_g1	1.11	6.96	2.55	1.23e-05	0.000273	yes	up	K07375	TUBB	path:ko04145;path:ko04540;path:ko05130
c53870_g1	3.73	9.37	1.31	1.23e-05	0.000273	yes	up	_	_	_
c39350_g1	6.48	13.03	1	1.24e-05	0.000274	no	up	_	_	_
c44466_g2	8.92	4.18	-1.08	1.24e-05	0.000274	yes	down	_	_	_
c40444_g1	56.14	29.35	-0.93	1.25e-05	0.000275	no	down	K15746	crtZ	path:ko00906;path:ko01100;path:ko01110
c42960_g1	0.53	0.05	-2.1	1.25e-05	0.000275	yes	down	_	_	_
c71339_g4	1.96	0.42	-1.98	1.26e-05	0.000278	yes	down	_	_	_
c49834_g1	0.59	2.77	2.05	1.27e-05	0.00028	yes	up	_	_	_
c60811_g2	2.82	5.34	0.9	1.27e-05	0.00028	no	up	K01530	E3.6.3.1	_
c69238_g4	11.12	20.32	0.86	1.27e-05	0.00028	no	up	K01719	hemD, UROS	path:ko00860;path:ko01100;path:ko01110
c69376_g1	1.21	4.39	1.77	1.28e-05	0.000281	yes	up	_	_	_
c48382_g3	2.24	0.47	-2.03	1.28e-05	0.000281	yes	down	K09422	MYBP	_
c88150_g1	0.17	2.29	3.15	1.29e-05	0.000284	yes	up	_	_	_
c48748_g1	7.52	16.5	1.12	1.3e-05	0.000285	yes	up	K13430	PBS1	path:ko04626
c108941_g1	0	0.42	2.38	1.3e-05	0.000285	yes	up	_	_	_
c70502_g3	159.14	94.48	-0.75	1.3e-05	0.000286	no	down	_	_	_
c71025_g1	0.21	2.25	2.93	1.32e-05	0.00029	yes	up	K15634	gpmB	path:ko00010;path:ko00260;path:ko00680;path:ko01100;path:ko01110;path:ko01120;path:ko01130;path:ko01200;path:ko01230
c8650_g1	9.29	29.74	1.67	1.32e-05	0.00029	yes	up	_	_	_
c16894_g1	25.76	43.42	0.75	1.32e-05	0.00029	no	up	_	_	_
c68695_g3	5.49	11.79	1.09	1.32e-05	0.00029	yes	up	_	_	_
c68688_g11	5.55	19.23	1.77	1.33e-05	0.000291	yes	up	_	_	_
c30935_g2	23.32	39.58	0.76	1.34e-05	0.000293	no	up	_	_	_
c55073_g1	4.24	13	1.59	1.35e-05	0.000294	yes	up	_	_	_
c70443_g1	53.03	30.74	-0.78	1.36e-05	0.000297	no	down	K01679	E4.2.1.2B, fumC	path:ko00020;path:ko00620;path:ko00720;path:ko01100;path:ko01110;path:ko01120;path:ko01130;path:ko01200;path:ko05200;path:ko05211
c46936_g1	558.08	326.83	-0.77	1.37e-05	0.000299	no	down	K02941	RP-LP0, RPLP0	path:ko03010
c103254_g1	0.06	0.61	2.15	1.37e-05	0.0003	yes	up	_	_	_
c27673_g1	0.89	0	-3.3	1.38e-05	0.0003	yes	down	_	_	_
c94206_g1	0	81.1	9.67	1.38e-05	0.0003	yes	up	_	_	_
c71845_g2	7.2	17.63	1.28	1.38e-05	0.000301	yes	up	K10999	CESA	_
c80721_g1	9.52	29.63	1.63	1.39e-05	0.000302	yes	up	_	_	_
c61623_g1	96.71	200.18	1.05	1.39e-05	0.000302	yes	up	_	_	_
c102174_g1	7.34	25.97	1.81	1.39e-05	0.000302	yes	up	K03781	katE, CAT, catB, srpA	path:ko00380;path:ko00630;path:ko01110;path:ko01130;path:ko01200;path:ko04011;path:ko04068;path:ko04146;path:ko04211;path:ko04212;path:ko04213;path:ko05014
c59912_g1	1.71	0.27	-2.31	1.4e-05	0.000304	yes	down	_	_	_
c94000_g1	15.1	30.31	1	1.4e-05	0.000305	yes	up	_	_	_
c70294_g1	4.6	2.02	-1.15	1.4e-05	0.000305	yes	down	K10683	BARD1	_
c49411_g1	0.28	1.91	2.39	1.41e-05	0.000306	yes	up	_	_	_
c68399_g1	0.25	3.23	3.26	1.41e-05	0.000306	yes	up	_	_	_
c62815_g2	220.39	127.81	-0.79	1.42e-05	0.000307	no	down	K02957	RP-S15Ae, RPS15A	path:ko03010
c25767_g2	120.75	63.16	-0.93	1.42e-05	0.000308	no	down	K00856	E2.7.1.20, ADK	path:ko00230;path:ko01100
c22600_g1	0.1	1.02	2.47	1.42e-05	0.000308	yes	up	_	_	_
c70874_g1	113.12	176.74	0.64	1.43e-05	0.000309	no	up	_	_	_
c50951_g1	8.33	13.29	0.67	1.44e-05	0.00031	no	up	K00507	SCD, desC	path:ko01040;path:ko01212;path:ko03320;path:ko04152;path:ko04212
c66346_g1	262.83	627.72	1.26	1.44e-05	0.000311	yes	up	_	_	_
c70525_g6	0.51	3.64	2.62	1.44e-05	0.000312	yes	up	K13457	RPM1, RPS3	path:ko04626
c67704_g4	99.17	57.48	-0.79	1.45e-05	0.000312	no	down	K02920	RP-L36e, RPL36	path:ko03010
c63783_g2	63.25	35.29	-0.84	1.46e-05	0.000315	no	down	K03955	NDUFAB1	path:ko00190;path:ko01100;path:ko04932;path:ko05010;path:ko05012;path:ko05016
c33291_g1	0	0.52	2.63	1.48e-05	0.000318	yes	up	K01106	E3.1.3.56	path:ko00562;path:ko01100;path:ko04070
c62645_g1	45.47	26.82	-0.76	1.48e-05	0.00032	no	down	_	_	_
c65138_g1	35.57	64.23	0.85	1.49e-05	0.00032	no	up	_	_	_
c8891_g1	0.24	0.01	-1.64	1.49e-05	0.000322	yes	down	_	_	_
c69551_g5	3.01	0.81	-1.77	1.5e-05	0.000323	yes	down	_	_	_
c65363_g1	2.87	7.22	1.3	1.5e-05	0.000323	yes	up	_	_	_
c63035_g1	0.03	2.86	4.48	1.51e-05	0.000324	yes	up	_	_	_
c66275_g2	0.09	0.6	1.9	1.51e-05	0.000325	yes	up	_	_	_
c37404_g1	0.8	3.14	1.85	1.51e-05	0.000325	yes	up	_	_	_
c55007_g1	55.72	28.77	-0.95	1.51e-05	0.000325	no	down	K09955	K09955	_
c66510_g1	4.35	1.49	-1.49	1.52e-05	0.000327	yes	down	K09587	CYP90B1, DWF4	path:ko00905;path:ko01100;path:ko01110
c71571_g4	0	0.58	2.77	1.54e-05	0.000329	yes	up	_	_	_
c57727_g1	3.86	11.1	1.5	1.57e-05	0.000337	yes	up	_	_	_
c71928_g1	1.98	5.36	1.39	1.57e-05	0.000337	yes	up	K13457	RPM1, RPS3	path:ko04626
c70616_g8	21.28	48.88	1.2	1.58e-05	0.000338	yes	up	_	_	_
c49479_g2	55.92	29.43	-0.92	1.59e-05	0.000339	no	down	K07199	PRKAB	path:ko04068;path:ko04152;path:ko04211;path:ko04213;path:ko04710;path:ko04910;path:ko04920;path:ko04921;path:ko04922;path:ko04931;path:ko04932;path:ko05410
c69737_g3	0.07	0.63	2.06	1.59e-05	0.00034	yes	up	K14515	EBF1_2	path:ko04075
c63080_g2	0.03	1.02	3.11	1.61e-05	0.000343	yes	up	_	_	_
c61096_g2	0.17	1.05	2.07	1.62e-05	0.000346	yes	up	K13258	HID	path:ko00943;path:ko01110
c63076_g1	53.95	89.66	0.73	1.64e-05	0.00035	no	up	K15404	K15404, CER1	path:ko00073;path:ko01110
c54457_g1	1.41	16.6	3.46	1.65e-05	0.000353	yes	up	_	_	_
c270_g1	0.1	0.76	2.13	1.68e-05	0.000358	yes	up	_	_	_
c53280_g1	0	0.91	3.34	1.68e-05	0.000358	yes	up	_	_	_
c53260_g1	18.07	39.88	1.14	1.69e-05	0.000359	yes	up	K19366	SPG20	path:ko04144
c50292_g2	12.19	22.15	0.86	1.7e-05	0.000362	no	up	_	_	_
c56385_g1	61.7	102.37	0.73	1.7e-05	0.000362	no	up	_	_	_
c69678_g3	0.19	1.4	2.39	1.71e-05	0.000363	yes	up	_	_	_
c60342_g1	0.03	1.23	3.4	1.71e-05	0.000363	yes	up	_	_	_
c67870_g1	0.01	2.04	4.27	1.73e-05	0.000366	yes	up	_	_	_
c65806_g4	0	2.79	4.85	1.73e-05	0.000367	yes	up	K08241	E2.1.1.141	path:ko00592;path:ko01110
c62798_g1	2.18	6.39	1.51	1.73e-05	0.000367	yes	up	K10664	ATL6S	_
c69281_g1	33.71	64.43	0.93	1.74e-05	0.00037	no	up	_	_	_
c67018_g1	0	2.64	4.78	1.76e-05	0.000373	yes	up	_	_	_
c38406_g1	5.44	1.77	-1.57	1.79e-05	0.000378	yes	down	_	_	_
c67196_g4	5.59	2.49	-1.13	1.79e-05	0.000379	yes	down	_	_	_
c6378_g1	47.91	79.5	0.73	1.8e-05	0.00038	no	up	_	_	_
c56520_g1	7.38	15.08	1.02	1.8e-05	0.00038	yes	up	K03327	TC.MATE, SLC47A, norM, mdtK, dinF	_
c40086_g1	1.23	11.48	3.12	1.81e-05	0.000381	yes	up	_	_	_
c65975_g2	3.79	1.22	-1.56	1.81e-05	0.000382	yes	down	_	_	_
c67096_g4	33.34	55.35	0.73	1.81e-05	0.000382	no	up	K09338	HD-ZIP	_
c79610_g1	0.02	0.25	1.59	1.81e-05	0.000382	yes	up	_	_	_
c69071_g1	72.58	42.6	-0.77	1.81e-05	0.000382	no	down	_	_	_
c61749_g1	6.31	2.8	-1.15	1.81e-05	0.000382	yes	down	_	_	_
c62356_g1	0.05	0.67	2.41	1.82e-05	0.000383	yes	up	_	_	_
c58312_g5	0.28	2.16	2.59	1.82e-05	0.000383	yes	up	_	_	_
c71083_g1	0.06	0.46	1.83	1.83e-05	0.000385	yes	up	_	_	_
c69264_g1	28.63	10.44	-1.45	1.85e-05	0.000388	yes	down	_	_	_
c63494_g1	5.48	42.91	2.95	1.87e-05	0.000394	yes	up	_	_	_
c67853_g1	0.16	1.02	2.07	1.88e-05	0.000395	yes	up	_	_	_
c62524_g4	0.21	0.91	1.69	1.89e-05	0.000396	yes	up	_	_	_
c69170_g1	12.83	6.93	-0.88	1.89e-05	0.000396	no	down	K03164	TOP2	_
c42466_g1	10.3	4.37	-1.22	1.89e-05	0.000397	yes	down	K10683	BARD1	_
c26932_g1	48.83	27.25	-0.84	1.9e-05	0.000397	no	down	_	_	_
c61429_g5	147	241.25	0.71	1.9e-05	0.000397	no	up	K01369	LGMN	path:ko04142;path:ko04612
c65067_g1	95.61	56.46	-0.76	1.9e-05	0.000398	no	down	K17080	PHB1	_
c7557_g1	0.1	1.07	2.53	1.91e-05	0.000399	yes	up	_	_	_
c108735_g1	57.96	34.3	-0.75	1.91e-05	0.000399	no	down	K00207	DPYD	path:ko00240;path:ko00410;path:ko00770;path:ko00983;path:ko01100
c64824_g1	15.47	29.75	0.94	1.92e-05	0.000402	no	up	K17991	PXG	path:ko00073
c63416_g3	0.18	1.52	2.53	1.93e-05	0.000402	yes	up	_	_	_
c8560_g1	22	61.45	1.48	1.93e-05	0.000402	yes	up	_	_	_
c54134_g3	0.36	1.88	2.12	1.93e-05	0.000402	yes	up	K12819	SLU7	path:ko03040
c65632_g7	0.5	2.78	2.27	1.95e-05	0.000406	yes	up	K14595	AOG	path:ko00906;path:ko01100;path:ko01110
c52620_g1	10.39	28.66	1.45	1.95e-05	0.000406	yes	up	_	_	_
c46150_g1	0.61	0.07	-2.1	1.95e-05	0.000407	yes	down	_	_	_
c70149_g1	15.97	27.51	0.78	1.98e-05	0.000412	no	up	_	_	_
c59796_g1	0.28	1.38	1.95	1.99e-05	0.000414	yes	up	_	_	_
c28734_g1	17.7	9.21	-0.94	2.02e-05	0.000419	no	down	_	_	_
c67824_g3	9.18	18.31	0.99	2.02e-05	0.00042	no	up	K15109	SLC25A20_29, CACT, CACL, CRC1	_
c16206_g1	37.88	18.97	-0.99	2.03e-05	0.000421	no	down	K10807	RRM1	path:ko00230;path:ko00240;path:ko00480;path:ko01100
c48293_g1	0.62	0.02	-2.6	2.04e-05	0.000423	yes	down	_	_	_
c71906_g1	0.25	1.34	2.03	2.05e-05	0.000426	yes	up	_	_	_
c68837_g4	1.4	4.36	1.57	2.07e-05	0.000428	yes	up	_	_	_
c61606_g1	1.53	4.2	1.4	2.08e-05	0.00043	yes	up	_	_	_
c17820_g2	30	58.69	0.97	2.08e-05	0.000431	no	up	K02639	petF	path:ko00195
c71695_g2	0.15	1.33	2.52	2.1e-05	0.000435	yes	up	_	_	_
c63897_g1	1.29	4.86	1.84	2.11e-05	0.000435	yes	up	K10664	ATL6S	_
c69763_g3	0	0.53	2.66	2.11e-05	0.000437	yes	up	_	_	_
c37899_g1	33.64	57.65	0.78	2.12e-05	0.000439	no	up	K07897	RAB7A	path:ko04144;path:ko04145;path:ko05132;path:ko05146;path:ko05152
c47613_g1	9.9	3.03	-1.67	2.14e-05	0.000441	yes	down	_	_	_
c48498_g1	1.9	5.48	1.48	2.14e-05	0.000441	yes	up	K16297	SCPL-II	_
c42396_g2	0.42	2.78	2.46	2.15e-05	0.000443	yes	up	_	_	_
c26973_g1	134.27	76.45	-0.81	2.15e-05	0.000444	no	down	K18491	ESX1	path:ko04550
c40590_g1	16.19	8.74	-0.88	2.16e-05	0.000444	no	down	K16812	TPX2	_
c53016_g1	4.06	9.28	1.18	2.16e-05	0.000444	yes	up	K14379	ACP5	path:ko04142;path:ko04380;path:ko05323
c58225_g3	10.71	21.88	1.02	2.18e-05	0.000448	yes	up	_	_	_
c71544_g1	5.28	11.8	1.14	2.2e-05	0.000452	yes	up	_	_	_
c62047_g5	89.99	39.98	-1.17	2.23e-05	0.000459	yes	down	_	_	_
c33579_g2	0	0.99	3.45	2.23e-05	0.000459	yes	up	_	_	_
c69955_g4	8.47	17.23	1.02	2.24e-05	0.00046	yes	up	K18592	GGT1_5	path:ko00430;path:ko00460;path:ko00480;path:ko00590;path:ko01100
c60789_g1	0.01	0.27	1.78	2.25e-05	0.000462	yes	up	K14638	SLC15A3_4, PHT	_
c69212_g5	0.08	0.82	2.36	2.25e-05	0.000462	yes	up	_	_	_
c63736_g1	780.47	474.23	-0.72	2.27e-05	0.000466	no	down	K01251	E3.3.1.1, ahcY	path:ko00270;path:ko01100
c70110_g1	1.38	0.23	-2.17	2.3e-05	0.00047	yes	down	_	_	_
c50029_g3	17.39	126	2.85	2.33e-05	0.000476	yes	up	_	_	_
c66586_g4	28.69	54.14	0.91	2.33e-05	0.000477	no	up	_	_	_
c60840_g3	3.58	13.6	1.9	2.34e-05	0.000478	yes	up	_	_	_
c59788_g1	0.21	0.98	1.79	2.34e-05	0.000478	yes	up	_	_	_
c60257_g1	3.01	5.65	0.89	2.35e-05	0.00048	no	up	K10896	FANCM	path:ko03460
c39203_g1	17.37	6.21	-1.47	2.36e-05	0.000482	yes	down	K08900	BCS1	_
c70716_g4	5.82	11.19	0.93	2.37e-05	0.000485	no	up	_	_	_
c71125_g2	18.06	31.99	0.82	2.38e-05	0.000485	no	up	_	_	_
c62928_g1	2.5	0.81	-1.52	2.38e-05	0.000486	yes	down	_	_	_
c108640_g1	0.02	0.56	2.49	2.39e-05	0.000486	yes	up	K01402	MMP8	_
c49629_g1	67.1	162.91	1.28	2.4e-05	0.000488	yes	up	_	_	_
c52868_g1	0.13	1	2.28	2.4e-05	0.000488	yes	up	_	_	_
c53763_g1	63.72	104.07	0.71	2.41e-05	0.000491	no	up	K13863	SLC7A1, ATRC1	path:ko05206
c68633_g5	8.75	20.51	1.22	2.44e-05	0.000496	yes	up	_	_	_
c65414_g1	15.81	8.83	-0.83	2.48e-05	0.000503	no	down	K10395	KIF4_21_27	_
c55003_g1	12.6	4.15	-1.58	2.48e-05	0.000503	yes	down	_	_	_
c69661_g1	13.36	6.26	-1.08	2.48e-05	0.000503	yes	down	_	_	_
c63428_g1	5.14	25.2	2.27	2.48e-05	0.000504	yes	up	_	_	_
c66992_g1	6.23	21.11	1.74	2.51e-05	0.000509	yes	up	_	_	_
c60430_g1	1.37	5.28	1.87	2.51e-05	0.000509	yes	up	_	_	_
c64424_g2	61.22	40.66	-0.59	2.56e-05	0.000518	no	down	K06670	SCC1, MCD1, RAD21	path:ko04110;path:ko04111
c71894_g2	0.79	5.01	2.52	2.58e-05	0.000521	yes	up	_	_	_
c71005_g3	15.98	26.18	0.71	2.59e-05	0.000523	no	up	K08818	CDC2L	_
c49806_g1	8.06	13.57	0.75	2.59e-05	0.000523	no	up	K10590	TRIP12	path:ko04120
c1324_g1	21.91	9.5	-1.2	2.6e-05	0.000525	yes	down	K02220	CLB1_2	path:ko04011;path:ko04111
c37471_g1	4.01	13.5	1.73	2.6e-05	0.000525	yes	up	_	_	_
c66808_g1	8.82	12.59	0.51	2.63e-05	0.000531	no	up	_	_	_
c60322_g1	2.19	6.67	1.56	2.65e-05	0.000535	yes	up	_	_	_
c70667_g1	6.74	13.49	0.99	2.66e-05	0.000536	no	up	K08235	E2.4.1.207	_
c37779_g2	0.21	1.23	2.1	2.67e-05	0.000539	yes	up	_	_	_
c21565_g1	77.57	43.11	-0.85	2.68e-05	0.000541	no	down	_	_	_
c68882_g1	15.93	31.66	0.99	2.71e-05	0.000546	no	up	K06617	E2.4.1.82	path:ko00052
c43236_g1	9.52	16.67	0.8	2.72e-05	0.000547	no	up	K14509	ETR, ERS	path:ko04075
c59870_g1	2.67	8.96	1.71	2.73e-05	0.00055	yes	up	_	_	_
c44462_g1	2	7.66	1.89	2.74e-05	0.000551	yes	up	K01193	E3.2.1.26, sacA	path:ko00052;path:ko00500;path:ko01100
c65749_g2	4.7	8.98	0.92	2.75e-05	0.000552	no	up	_	_	_
c52690_g1	0.16	2.16	3.12	2.75e-05	0.000552	yes	up	_	_	_
c38491_g1	0.02	0.64	2.59	2.75e-05	0.000553	yes	up	K14488	SAUR	path:ko04075
c58766_g1	5.54	1.52	-1.8	2.76e-05	0.000554	yes	down	_	_	_
c68376_g1	8.6	25.45	1.55	2.77e-05	0.000554	yes	up	_	_	_
c65937_g1	26.25	14.74	-0.83	2.78e-05	0.000558	no	down	K14775	UTP30, RSL1D1	_
c43501_g1	0	11.27	6.83	2.79e-05	0.000558	yes	up	_	_	_
c65485_g1	0.83	0.07	-2.41	2.8e-05	0.000561	yes	down	_	_	_
c61165_g1	11.59	20.08	0.79	2.8e-05	0.000561	no	up	_	_	_
c70682_g4	4.62	10.4	1.15	2.81e-05	0.000563	yes	up	_	_	_
c70646_g2	0.02	0.47	2.28	2.87e-05	0.000573	yes	up	_	_	_
c71663_g1	9.3	3.96	-1.21	2.88e-05	0.000574	yes	down	_	_	_
c34072_g1	0	0.48	2.54	2.88e-05	0.000574	yes	up	_	_	_
c59251_g1	1.85	0.35	-2.12	2.89e-05	0.000577	yes	down	_	_	_
c64864_g1	55.56	32.6	-0.77	2.9e-05	0.000578	no	down	_	_	_
c68356_g1	0.63	5.26	2.87	2.94e-05	0.000586	yes	up	_	_	_
c13552_g1	1.41	4.82	1.71	2.94e-05	0.000587	yes	up	_	_	_
c54433_g1	7.47	20.51	1.45	2.98e-05	0.000592	yes	up	_	_	_
c70388_g12	8.27	17.53	1.07	3e-05	0.000597	yes	up	_	_	_
c46957_g1	23.7	14	-0.76	3.01e-05	0.000598	no	down	K12852	EFTUD2	path:ko03040
c17044_g1	2.27	7.12	1.6	3.02e-05	0.000599	yes	up	_	_	_
c65775_g2	18.7	35.83	0.93	3.02e-05	0.0006	no	up	K15121	SLC25A44	_
c73280_g1	0	0.47	2.5	3.02e-05	0.0006	yes	up	_	_	_
c79614_g1	0.06	0.54	2.04	3.03e-05	0.000601	yes	up	_	_	_
c8578_g2	21.47	41.16	0.94	3.03e-05	0.000601	no	up	K12502	VTE3, APG1	path:ko00130;path:ko01100;path:ko01110
c54822_g1	212.1	124.95	-0.76	3.04e-05	0.000602	no	down	K02893	RP-L23Ae, RPL23A	path:ko03010
c63886_g4	5.17	11.06	1.08	3.04e-05	0.000603	yes	up	_	_	_
c69900_g1	0.29	9.59	4.62	3.05e-05	0.000603	yes	up	_	_	_
c70613_g4	5.39	1.91	-1.45	3.05e-05	0.000603	yes	down	_	_	_
c108803_g1	0.1	1.31	2.81	3.05e-05	0.000603	yes	up	_	_	_
c4819_g1	22.82	37.46	0.71	3.06e-05	0.000605	no	up	_	_	_
c67662_g1	4.98	1.97	-1.29	3.07e-05	0.000607	yes	down	_	_	_
c56026_g1	0.07	0.77	2.36	3.07e-05	0.000607	yes	up	K04125	E1.14.11.13	path:ko00904
c71431_g4	36.57	18.21	-1	3.11e-05	0.000614	yes	down	_	_	_
c71084_g5	3.34	0.67	-2.16	3.12e-05	0.000615	yes	down	K14496	PYL	path:ko04075
c58518_g1	0.77	3.72	2.13	3.13e-05	0.000617	yes	up	_	_	_
c70470_g2	2.46	0.85	-1.43	3.14e-05	0.000618	yes	down	K02552	menF	path:ko00130;path:ko01053;path:ko01100;path:ko01110;path:ko01130
c69979_g1	12.81	24.12	0.91	3.14e-05	0.000618	no	up	_	_	_
c47557_g1	1.64	8.85	2.36	3.14e-05	0.000618	yes	up	_	_	_
c70179_g3	5.66	10.27	0.85	3.15e-05	0.00062	no	up	K15731	CTDSP	_
c25432_g1	4.25	0.94	-2.06	3.2e-05	0.000629	yes	down	_	_	_
c70437_g4	12.54	22.02	0.81	3.2e-05	0.000629	no	up	K10357	MYO5	_
c49366_g1	9.5	4.91	-0.94	3.21e-05	0.000631	no	down	_	_	_
c56032_g1	0.13	0.82	2.02	3.23e-05	0.000634	yes	up	_	_	_
c69331_g3	0.37	12.03	4.69	3.25e-05	0.000638	yes	up	K03025	RPC6, POLR3F	path:ko00230;path:ko00240;path:ko01100;path:ko03020;path:ko04623;path:ko05169
c6329_g1	0	1.51	4.01	3.3e-05	0.000647	yes	up	_	_	_
c62179_g3	0.33	1.3	1.71	3.31e-05	0.000648	yes	up	_	_	_
c49293_g1	78.15	133.26	0.77	3.32e-05	0.000651	no	up	K00799	GST, gst	path:ko00480;path:ko00980;path:ko00982;path:ko05204
c56082_g1	187.51	353.01	0.91	3.36e-05	0.000658	no	up	K01858	INO1, ISYNA1	path:ko00521;path:ko00562;path:ko01100;path:ko01130
c33505_g1	0.53	3.89	2.66	3.38e-05	0.000662	yes	up	_	_	_
c15181_g1	0	1.31	3.82	3.39e-05	0.000663	yes	up	_	_	_
c66753_g1	3.24	7.39	1.17	3.39e-05	0.000663	yes	up	K14638	SLC15A3_4, PHT	_
c67250_g2	25.3	13.01	-0.95	3.42e-05	0.000668	no	down	K06688	UBE2C, UBC11	path:ko04120
c71747_g3	13.56	25.95	0.93	3.42e-05	0.000668	no	up	_	_	_
c56111_g1	103.31	201.02	0.96	3.43e-05	0.00067	no	up	K02717	psbP	path:ko00195;path:ko01100
c55675_g1	0	5.8	5.88	3.43e-05	0.00067	yes	up	_	_	_
c50561_g1	66.11	38.02	-0.8	3.44e-05	0.00067	no	down	K02996	RP-S9, MRPS9, rpsI	path:ko03010
c58700_g1	2.16	0.59	-1.71	3.44e-05	0.000672	yes	down	_	_	_
c290_g1	3.09	0.17	-3.54	3.49e-05	0.000681	yes	down	_	_	_
c66897_g1	352.12	204.65	-0.78	3.5e-05	0.000681	no	down	K07374	TUBA	path:ko04145;path:ko04210;path:ko04540;path:ko05130
c71511_g1	1.24	4.77	1.86	3.5e-05	0.000681	yes	up	_	_	_
c71926_g1	7.48	3.96	-0.9	3.54e-05	0.000688	no	down	K12619	XRN2, RAT1	path:ko03008;path:ko03018
c21439_g1	9.77	30.52	1.63	3.54e-05	0.000688	yes	up	K03113	EIF1, SUI1	path:ko03013
c54577_g1	0.07	1.6	3.31	3.54e-05	0.000688	yes	up	_	_	_
c62185_g1	17.03	6.36	-1.41	3.54e-05	0.000688	yes	down	_	_	_
c63833_g1	0.13	0.92	2.14	3.57e-05	0.000693	yes	up	_	_	_
c48061_g1	0.97	4.22	2.02	3.58e-05	0.000695	yes	up	K07964	HPSE	path:ko00531;path:ko01100;path:ko05205
c70769_g3	0	5.48	5.8	3.58e-05	0.000695	yes	up	K02960	RP-S16e, RPS16	path:ko03010
c65790_g1	0	1.7	4.17	3.62e-05	0.000702	yes	up	_	_	_
c65974_g6	0.69	4.12	2.41	3.62e-05	0.000702	yes	up	_	_	_
c60470_g1	0.72	4.33	2.44	3.63e-05	0.000704	yes	up	_	_	_
c53273_g1	0	0.21	1.62	3.64e-05	0.000705	yes	up	_	_	_
c79570_g1	9.76	4.11	-1.23	3.67e-05	0.00071	yes	down	_	_	_
c52701_g1	30.38	16	-0.92	3.67e-05	0.00071	no	down	K17402	MRPS23	_
c62696_g1	10.98	30.83	1.48	3.67e-05	0.00071	yes	up	K16285	XERICO	_
c71046_g1	63.73	97.24	0.61	3.68e-05	0.00071	no	up	K17095	ANXA7_11	_
c27466_g1	0.25	1.49	2.19	3.68e-05	0.000711	yes	up	_	_	_
c61408_g1	20.44	11.19	-0.86	3.69e-05	0.000713	no	down	K15923	AXY8, FUC95A, afcA	path:ko00511
c54940_g1	285.92	163.2	-0.81	3.7e-05	0.000714	no	down	K01739	metB	path:ko00270;path:ko00450;path:ko00920;path:ko01100;path:ko01110;path:ko01130;path:ko01230
c63934_g1	7.31	2.65	-1.43	3.71e-05	0.000715	yes	down	K17479	GRXCR1	_
c4611_g1	0.83	2.83	1.66	3.75e-05	0.000722	yes	up	_	_	_
c52217_g1	23.53	13.56	-0.79	3.75e-05	0.000722	no	down	K07119	K07119	_
c47785_g1	2.1	11.27	2.37	3.77e-05	0.000725	yes	up	_	_	_
c59823_g1	2.09	5.35	1.31	3.77e-05	0.000725	yes	up	_	_	_
c71580_g1	15.02	8.94	-0.74	3.77e-05	0.000726	no	down	K12120	PHYA	path:ko04712
c61151_g1	0.35	2.21	2.37	3.8e-05	0.00073	yes	up	_	_	_
c59648_g1	0.3	1.99	2.37	3.81e-05	0.000731	yes	up	_	_	_
c68718_g2	1.1	3.29	1.5	3.81e-05	0.000732	yes	up	_	_	_
c12878_g1	0.05	0.8	2.54	3.81e-05	0.000732	yes	up	_	_	_
c16064_g1	0.08	1.8	3.37	3.82e-05	0.000732	yes	up	_	_	_
c28839_g1	333.29	197.99	-0.75	3.82e-05	0.000732	no	down	K02891	RP-L22e, RPL22	path:ko03010
c62668_g1	1.2	5.64	2.14	3.86e-05	0.000739	yes	up	_	_	_
c70205_g3	10.19	19.74	0.95	3.86e-05	0.000739	no	up	_	_	_
c59636_g1	1.05	3.33	1.58	3.88e-05	0.000742	yes	up	K09419	HSFF	_
c65751_g1	0.14	0.73	1.76	3.9e-05	0.000745	yes	up	_	_	_
c32451_g1	0	18.15	7.51	3.9e-05	0.000745	yes	up	_	_	_
c72124_g1	54.6	106.77	0.97	3.9e-05	0.000745	no	up	K00927	PGK, pgk	path:ko00010;path:ko00710;path:ko01100;path:ko01110;path:ko01120;path:ko01130;path:ko01200;path:ko01230
c58497_g1	0.01	0.41	2.16	3.91e-05	0.000746	yes	up	K14846	RPF1	_
c43402_g1	0.7	11.74	3.89	3.95e-05	0.000754	yes	up	_	_	_
c68989_g1	0.02	0.24	1.55	3.96e-05	0.000755	yes	up	_	_	_
c68030_g2	34.27	21.77	-0.65	3.97e-05	0.000757	no	down	_	_	_
c70082_g4	38.25	17.82	-1.1	3.98e-05	0.000759	yes	down	K11254	H4	path:ko05034;path:ko05203;path:ko05322
c20254_g1	34.68	17.54	-0.98	3.99e-05	0.00076	no	down	K11128	GAR1, NOLA1	path:ko03008
c66290_g1	15.49	8.48	-0.86	4e-05	0.000761	no	down	_	_	_
c70519_g3	0	4.88	5.64	4.02e-05	0.000766	yes	up	K00962	pnp, PNPT1	path:ko00230;path:ko00240;path:ko03018
c24955_g1	0.77	0.08	-2.3	4.04e-05	0.000768	yes	down	_	_	_
c69856_g1	2.74	6.94	1.31	4.04e-05	0.000768	yes	up	_	_	_
c71236_g1	9.28	15.61	0.74	4.04e-05	0.000768	no	up	_	_	_
c13246_g1	0.48	23.65	5.36	4.13e-05	0.000784	yes	up	_	_	_
c51522_g1	0.96	23.8	4.5	4.15e-05	0.000788	yes	up	K09873	TIP	_
c70777_g2	3.75	13.37	1.81	4.17e-05	0.00079	yes	up	K18108	E4.2.3.111	path:ko00902;path:ko01100;path:ko01110
c68743_g2	4.07	8.47	1.04	4.19e-05	0.000794	yes	up	K03294	TC.APA	_
c56349_g1	3	0.94	-1.57	4.2e-05	0.000797	yes	down	_	_	_
c32716_g1	0.4	4.57	3.22	4.21e-05	0.000797	yes	up	K01728	pel	path:ko00040
c55996_g2	84.39	171.68	1.02	4.21e-05	0.000797	yes	up	K00522	FTH1	path:ko04978
c59013_g1	31.69	16.25	-0.96	4.24e-05	0.000802	no	down	K02639	petF	path:ko00195
c53219_g2	0	0.99	3.45	4.28e-05	0.00081	yes	up	_	_	_
c18847_g1	21.3	37.28	0.8	4.29e-05	0.000811	no	up	K01338	lon	path:ko04112
c95228_g1	0.01	0.22	1.49	4.33e-05	0.000818	yes	up	_	_	_
c71789_g1	0.33	1.36	1.76	4.33e-05	0.000818	yes	up	_	_	_
c36566_g2	0	4.81	5.59	4.33e-05	0.000818	yes	up	K10742	DNA2	path:ko03030
c53249_g1	0.19	0.72	1.5	4.34e-05	0.000819	yes	up	K13457	RPM1, RPS3	path:ko04626
c36834_g1	1.55	7.23	2.15	4.34e-05	0.000819	yes	up	_	_	_
c71174_g1	1.55	5.28	1.7	4.35e-05	0.000819	yes	up	_	_	_
c59022_g1	0.09	0.79	2.21	4.36e-05	0.000822	yes	up	_	_	_
c67692_g1	0.23	1.07	1.84	4.39e-05	0.000827	yes	up	_	_	_
c40861_g1	19.3	34.66	0.84	4.46e-05	0.00084	no	up	K00430	E1.11.1.7	path:ko00940;path:ko01100;path:ko01110
c67349_g1	23.27	38.9	0.74	4.47e-05	0.000841	no	up	_	_	_
c50187_g1	40.87	66.67	0.7	4.48e-05	0.000842	no	up	K11968	ARIH1	_
c48061_g2	0.82	3.83	2.09	4.5e-05	0.000846	yes	up	K07964	HPSE	path:ko00531;path:ko01100;path:ko05205
c66973_g1	0.2	0.89	1.74	4.51e-05	0.000846	yes	up	_	_	_
c70370_g1	0	14.38	7.18	4.52e-05	0.000848	yes	up	_	_	_
[truncated: 61,065 more rows]

## Sheet: Ch02vsCh03
seq_id	Ch02_mean_fpkm	Ch03_mean_fpkm	logFC(Ch03/Ch02)	p-value	FDR	significant	regulate	Gene_ID	KEGG_Gene	KEGG_Pathway
c66518_g1	0.57	841.11	10.3	9.57e-66	3.5e-61	yes	up	_	_	_
c63899_g2	0	608.13	12.57	2.17e-61	3.97e-57	yes	up	K15382	SLC50A, SWEET	_
c63899_g1	0.1	584.48	11.54	8.23e-57	1e-52	yes	up	K15382	SLC50A, SWEET	_
c37897_g1	0.23	215.67	9.34	1.81e-56	1.66e-52	yes	up	K09285	OVM, ANT	_
c57442_g1	35.32	10757.9	8.25	1.33e-52	9.72e-49	yes	up	_	_	_
c59769_g1	247.2	0.71	-8.25	3.96e-50	2.42e-46	yes	down	_	_	_
c56461_g1	0.65	1485.95	10.95	8.95e-48	4.68e-44	yes	up	_	_	_
c62745_g3	77.91	0.19	-8.07	2.51e-45	1.15e-41	yes	down	K09338	HD-ZIP	_
c53505_g1	0.37	839.16	10.81	9.14e-45	3.72e-41	yes	up	_	_	_
c68888_g2	0.02	50.73	8.74	1.02e-43	3.75e-40	yes	up	_	_	_
c8598_g1	248.55	1.12	-7.67	5.09e-43	1.69e-39	yes	down	_	_	_
c65404_g3	7.56	5838.16	9.57	1.7e-42	5.2e-39	yes	up	_	_	_
c27116_g1	0	78.76	9.62	1.98e-42	5.58e-39	yes	up	_	_	_
c55308_g1	52.37	0	-9.04	7.11e-42	1.86e-38	yes	down	_	_	_
c68221_g6	0.69	361.62	8.83	7.45e-41	1.82e-37	yes	up	K14490	AHP	path:ko04075
c70555_g4	293.39	1.9	-7.2	2.12e-40	4.86e-37	yes	down	_	_	_
c47352_g1	0.28	82.65	7.76	2.49e-40	5.36e-37	yes	up	_	_	_
c66234_g1	0.07	19.1	6.83	4.93e-40	1e-36	yes	up	_	_	_
c70555_g3	51.86	0.07	-8.22	6.54e-40	1.26e-36	yes	down	_	_	_
c68629_g1	0.07	52.14	8.28	8.69e-40	1.59e-36	yes	up	K16285	XERICO	_
c4573_g1	0.07	293.39	10.71	1.05e-39	1.83e-36	yes	up	K01637	E4.1.3.1, aceA	path:ko00630;path:ko01100;path:ko01110;path:ko01120;path:ko01200
c70122_g1	123.24	0.2	-8.66	3.81e-39	6.33e-36	yes	down	_	_	_
c70688_g1	75.44	0.55	-6.85	1.61e-38	2.56e-35	yes	down	_	_	_
c65080_g2	148.14	0.53	-7.88	5.06e-38	7.72e-35	yes	down	_	_	_
c23403_g1	0.35	102.46	7.83	5.79e-38	8.48e-35	yes	up	K14504	TCH4	path:ko04075
c48103_g1	0.65	269.01	8.49	1.81e-37	2.49e-34	yes	up	_	_	_
c57045_g1	0.36	172.69	8.57	1.84e-37	2.49e-34	yes	up	_	_	_
c58500_g1	0.48	642.59	10.12	2.06e-37	2.69e-34	yes	up	K01602	rbcS	path:ko00630;path:ko00710;path:ko01100;path:ko01120;path:ko01200
c67552_g1	6.33	427.76	6.06	5.36e-37	6.77e-34	yes	up	K17099	ANXA13	_
c23662_g1	0.02	127.69	10.08	1.04e-36	1.27e-33	yes	up	_	_	_
c71357_g6	0.41	239.56	8.87	3.51e-36	4.14e-33	yes	up	K00430	E1.11.1.7	path:ko00940;path:ko01100;path:ko01110
c64083_g1	38.91	0.02	-8.34	7.48e-36	8.56e-33	yes	down	_	_	_
c59635_g1	138.24	0.86	-7.18	3.59e-35	3.99e-32	yes	down	_	_	_
c94081_g1	44.41	0.3	-6.81	5.99e-35	6.46e-32	yes	down	_	_	_
c48320_g2	0.02	9.08	6.24	5.65e-34	5.91e-31	yes	up	_	_	_
c79551_g1	0.29	290.6	9.54	1.51e-33	1.54e-30	yes	up	_	_	_
c72159_g1	0.57	52.74	6.31	5.25e-33	5.2e-30	yes	up	K08235	E2.4.1.207	_
c22375_g1	70.53	0.13	-8.28	8.33e-33	8.02e-30	yes	down	_	_	_
c61610_g1	0.53	186.43	8.21	1.73e-32	1.63e-29	yes	up	K10781	FATB	path:ko00061;path:ko01100;path:ko01212
c70555_g2	1083.08	6.27	-7.41	2.17e-32	1.99e-29	yes	down	_	_	_
c34836_g1	118.41	0.91	-6.87	3.85e-32	3.44e-29	yes	down	_	_	_
c79527_g1	0.36	21.75	5.58	4.26e-32	3.71e-29	yes	up	K09458	fabF	path:ko00061;path:ko00780;path:ko01100;path:ko01212
c57147_g1	0.05	72.28	8.93	7.03e-32	5.99e-29	yes	up	K14504	TCH4	path:ko04075
c101379_g1	0.24	51.91	7.27	7.21e-32	6e-29	yes	up	K12604	CNOT1, NOT1	path:ko03018
c67890_g1	116.56	0.44	-7.75	9.4e-32	7.65e-29	yes	down	K00422	E1.10.3.1	path:ko00350;path:ko00950;path:ko01100;path:ko01110
c68537_g1	1.25	4337.47	11.65	1.36e-29	1.06e-26	yes	up	_	_	_
c42091_g1	18.28	0.33	-5.43	1.36e-29	1.06e-26	yes	down	_	_	_
c53696_g1	0.35	26.19	5.88	1.48e-29	1.13e-26	yes	up	_	_	_
c60536_g1	0.54	3673.54	12.5	1.71e-29	1.28e-26	yes	up	_	_	_
c9098_g2	35.3	0.41	-6.1	2.57e-29	1.88e-26	yes	down	_	_	_
c4595_g1	0.03	13.52	6.68	3.49e-29	2.51e-26	yes	up	_	_	_
c65155_g1	0.06	22.25	7.15	5e-29	3.52e-26	yes	up	K09422	MYBP	_
c62892_g2	2.01	123.44	5.87	6.16e-29	4.26e-26	yes	up	_	_	_
c63339_g1	0.02	19.03	7.33	8.15e-29	5.52e-26	yes	up	_	_	_
c61147_g1	194.7	0.71	-7.91	8.78e-29	5.85e-26	yes	down	K13448	CML	path:ko04626
c67834_g1	0.11	247.31	10.22	1.43e-28	9.35e-26	yes	up	_	_	_
c71729_g2	0.01	20.82	7.57	2.05e-28	1.32e-25	yes	up	_	_	_
c19271_g1	0.43	45.99	6.44	2.41e-28	1.52e-25	yes	up	_	_	_
c36970_g1	1.44	60.02	5.28	6.28e-28	3.9e-25	yes	up	K10999	CESA	_
c27398_g1	3.19	688.3	7.71	8.65e-28	5.28e-25	yes	up	_	_	_
c51773_g2	0.02	13.25	6.76	1.26e-27	7.57e-25	yes	up	K00121	frmA, ADH5, adhC	path:ko00010;path:ko00071;path:ko00350;path:ko00625;path:ko00626;path:ko00680;path:ko00830;path:ko00980;path:ko00982;path:ko01100;path:ko01110;path:ko01120;path:ko01130;path:ko01200;path:ko01220;path:ko05204
c68291_g1	127.8	0.62	-7.48	2.02e-27	1.19e-24	yes	down	_	_	_
c51690_g2	20.9	0.08	-6.9	2.87e-27	1.67e-24	yes	down	K00422	E1.10.3.1	path:ko00350;path:ko00950;path:ko01100;path:ko01110
c19474_g1	31.06	0.9	-4.96	3.45e-27	1.97e-24	yes	down	K01592	E4.1.1.25	path:ko00350;path:ko00950;path:ko01100;path:ko01110
c16158_g1	0.11	2816.05	13.74	1.25e-26	7.07e-24	yes	up	_	_	_
c71503_g1	33.51	1.28	-4.61	1.81e-26	1.01e-23	yes	down	K05665	ABCC1	path:ko02010;path:ko04071;path:ko04977;path:ko05206
c59753_g2	0.07	24.02	7.13	1.96e-26	1.07e-23	yes	up	_	_	_
c36970_g2	2.03	73.36	5.11	5.28e-26	2.84e-23	yes	up	K10999	CESA	_
c62891_g1	16.71	0.06	-6.76	5.54e-26	2.94e-23	yes	down	_	_	_
c27228_g1	3.29	367.55	6.76	6.2e-26	3.24e-23	yes	up	_	_	_
c60103_g1	5.9	179.72	4.91	7.72e-26	3.98e-23	yes	up	K18787	ACL5	_
c69689_g4	0.84	85.18	6.5	1.07e-25	5.42e-23	yes	up	_	_	_
c23045_g1	70.68	0	-9.47	1.26e-25	6.26e-23	yes	down	_	_	_
c46413_g1	0.17	202.12	9.57	1.27e-25	6.26e-23	yes	up	_	_	_
c53829_g2	0.08	17.6	6.61	1.85e-25	9.02e-23	yes	up	_	_	_
c22260_g1	2.06	124.24	5.85	2.98e-25	1.44e-22	yes	up	_	_	_
c65491_g1	38.41	0.18	-7.13	4.79e-25	2.28e-22	yes	down	_	_	_
c51522_g1	23.8	0.07	-7.12	5.83e-25	2.74e-22	yes	down	K09873	TIP	_
c59553_g1	11.1	0.14	-5.53	6.58e-25	3.05e-22	yes	down	_	_	_
c72207_g1	0	101.96	10	8.49e-25	3.88e-22	yes	up	_	_	_
c65404_g1	0.54	1478.51	11.17	1.01e-24	4.56e-22	yes	up	_	_	_
c57620_g1	75.63	0.81	-6.38	1.28e-24	5.71e-22	yes	down	_	_	_
c79491_g1	78.83	1.05	-6.1	1.31e-24	5.78e-22	yes	down	_	_	_
c86830_g1	2.18	280.47	6.94	1.61e-24	7.02e-22	yes	up	_	_	_
c61801_g1	0.04	108.66	9.59	1.85e-24	7.96e-22	yes	up	_	_	_
c39585_g1	52.37	0.06	-8.35	2.12e-24	9.03e-22	yes	down	_	_	_
c101439_g1	3.07	1007.13	8.31	2.53e-24	1.06e-21	yes	up	_	_	_
c70569_g4	34.06	0.2	-6.82	4.9e-24	2.04e-21	yes	down	_	_	_
c69153_g2	13.57	0.01	-6.9	6.11e-24	2.51e-21	yes	down	K01051	E3.1.1.11	path:ko00040;path:ko00500;path:ko01100
c66754_g1	0.05	50.39	8.36	6.17e-24	2.51e-21	yes	up	_	_	_
c63221_g1	58.77	0.94	-5.83	6.36e-24	2.56e-21	yes	down	_	_	_
c67259_g1	72.62	0.71	-6.48	6.8e-24	2.69e-21	yes	down	K09843	E1.14.13.93	path:ko00906
c65979_g1	42.72	1.21	-5.03	6.84e-24	2.69e-21	yes	down	K08150	SLC2A13, ITR	_
c55702_g1	202.39	0.38	-8.73	6.99e-24	2.72e-21	yes	down	_	_	_
c69475_g3	8.52	0.03	-6.1	1.43e-23	5.51e-21	yes	down	K13508	GPAT	path:ko00561;path:ko00564;path:ko01100;path:ko01110
c71095_g7	0.31	35.23	6.41	1.48e-23	5.63e-21	yes	up	_	_	_
c71811_g1	0.02	15.92	7.02	1.55e-23	5.8e-21	yes	up	_	_	_
c66478_g1	66.92	0	-9.39	1.55e-23	5.8e-21	yes	down	_	_	_
c61545_g4	31	0.26	-6.45	1.61e-23	5.95e-21	yes	down	_	_	_
c62822_g1	7.81	0	-6.3	1.89e-23	6.93e-21	yes	down	_	_	_
c65093_g1	8.79	0	-6.47	2.66e-23	9.66e-21	yes	down	_	_	_
c59203_g1	18.8	8310.02	8.78	2.91e-23	1.05e-20	yes	up	_	_	_
c48320_g3	0.01	13.88	6.98	3.88e-23	1.38e-20	yes	up	_	_	_
c62997_g1	77.13	1.7	-5.42	3.97e-23	1.4e-20	yes	down	_	_	_
c69981_g1	60.87	1.05	-5.73	6.66e-23	2.32e-20	yes	down	_	_	_
c50255_g1	870.24	10.59	-6.35	8.47e-23	2.91e-20	yes	down	_	_	_
c95003_g1	0.01	12.98	6.92	8.49e-23	2.91e-20	yes	up	_	_	_
c50894_g1	0.18	23.05	6.35	8.93e-23	3.03e-20	yes	up	_	_	_
c55319_g1	56.89	0.31	-7.13	9.92e-23	3.33e-20	yes	down	_	_	_
c70927_g2	16.08	0.29	-5.39	1.22e-22	4.07e-20	yes	down	K15718	LOX1_5	path:ko00591
c9099_g1	0	86.39	9.76	1.29e-22	4.26e-20	yes	up	_	_	_
c61486_g1	15.63	0.1	-6.27	1.32e-22	4.32e-20	yes	down	K01051	E3.1.1.11	path:ko00040;path:ko00500;path:ko01100
c72780_g1	31.95	0.31	-6.29	1.77e-22	5.72e-20	yes	down	_	_	_
c70303_g5	0.02	22.38	7.55	2.14e-22	6.87e-20	yes	up	K11982	RNF115_126	_
c52620_g1	28.66	0.52	-5.53	2.18e-22	6.93e-20	yes	down	_	_	_
c65184_g2	26.52	0.79	-4.9	2.38e-22	7.51e-20	yes	down	K01246	tag	path:ko03410
c108733_g1	0.08	124.87	9.42	2.74e-22	8.58e-20	yes	up	_	_	_
c50957_g1	180.2	0.15	-9.49	4.06e-22	1.26e-19	yes	down	_	_	_
c2995_g1	0.59	29.19	5.41	5.55e-22	1.71e-19	yes	up	K18482	ADCL	path:ko00790
c56979_g1	7.63	0	-6.27	6.62e-22	2.02e-19	yes	down	_	_	_
c69660_g4	21.02	0.48	-5.18	6.86e-22	2.08e-19	yes	down	_	_	_
c68790_g1	14.01	0.51	-4.54	8.3e-22	2.49e-19	yes	down	_	_	_
c66927_g7	19.58	0.53	-4.95	9.23e-22	2.75e-19	yes	down	_	_	_
c57801_g1	14.25	0.01	-7.01	9.35e-22	2.76e-19	yes	down	K01213	E3.2.1.67	path:ko00040;path:ko00500;path:ko01100
c38619_g1	82.39	2.58	-4.94	9.99e-22	2.93e-19	yes	down	K10960	chlP, bchP	path:ko00860;path:ko00900;path:ko01100;path:ko01110
c61046_g2	11.48	0	-6.85	1.2e-21	3.48e-19	yes	down	_	_	_
c56647_g1	1.97	123.37	5.9	1.23e-21	3.53e-19	yes	up	K01193	E3.2.1.26, sacA	path:ko00052;path:ko00500;path:ko01100
c70291_g1	3.83	83.84	4.42	1.28e-21	3.65e-19	yes	up	K11991	tadA	_
c71653_g1	4.27	0.03	-5.04	1.32e-21	3.75e-19	yes	down	_	_	_
c62855_g1	22.79	0.15	-6.54	2.16e-21	6.09e-19	yes	down	_	_	_
c64335_g1	20.23	0.49	-5.12	2.39e-21	6.69e-19	yes	down	_	_	_
c71336_g2	0.01	10.76	6.61	2.91e-21	8.09e-19	yes	up	_	_	_
c102378_g1	0.21	27.63	6.48	3.86e-21	1.06e-18	yes	up	_	_	_
c59345_g1	17.17	0.19	-5.87	3.99e-21	1.09e-18	yes	down	_	_	_
c60482_g1	32.73	1.41	-4.44	4.08e-21	1.11e-18	yes	down	_	_	_
c51504_g1	10.95	0.17	-5.33	4.15e-21	1.12e-18	yes	down	K06001	trpB	path:ko00260;path:ko00400;path:ko01100;path:ko01110;path:ko01130;path:ko01230
c33403_g2	40.39	0.47	-6.15	4.46e-21	1.19e-18	yes	down	K13464	JAZ	path:ko04075
c70555_g5	35.39	0.23	-6.75	4.54e-21	1.2e-18	yes	down	_	_	_
c54222_g2	43.75	0.22	-7.11	4.87e-21	1.28e-18	yes	down	_	_	_
c50559_g1	25.07	0.11	-6.93	5.17e-21	1.35e-18	yes	down	_	_	_
c35073_g1	49.88	0.08	-8.13	5.73e-21	1.49e-18	yes	down	_	_	_
c69305_g1	0.1	29	7.16	5.83e-21	1.5e-18	yes	up	K15920	XYL4	path:ko00500;path:ko00520;path:ko01100
c71645_g1	0.27	26.06	6.16	6.83e-21	1.75e-18	yes	up	_	_	_
c66005_g2	28.94	0.89	-4.87	8.16e-21	2.07e-18	yes	down	_	_	_
c67125_g7	0.06	36.17	7.83	8.24e-21	2.08e-18	yes	up	K14432	ABF	path:ko04075
c1359_g1	0.5	190.27	8.3	9.5e-21	2.38e-18	yes	up	_	_	_
c62728_g4	2.47	122.87	5.58	1.13e-20	2.79e-18	yes	up	_	_	_
c62044_g2	0.02	14.73	6.9	1.13e-20	2.79e-18	yes	up	K14490	AHP	path:ko04075
c59345_g3	42.11	0.17	-7.3	1.93e-20	4.74e-18	yes	down	_	_	_
c64544_g1	0.08	1540.14	13.1	2.1e-20	5.13e-18	yes	up	K01785	galM, GALM	path:ko00010;path:ko00052;path:ko01100;path:ko01110;path:ko01120;path:ko01130
c69035_g3	8.82	160.73	4.17	2.19e-20	5.32e-18	yes	up	_	_	_
c26973_g1	76.45	4.83	-3.96	2.8e-20	6.75e-18	yes	down	K18491	ESX1	path:ko04550
c86874_g1	0.23	29.57	6.49	5.42e-20	1.3e-17	yes	up	K08235	E2.4.1.207	_
c70149_g1	27.51	438.68	3.99	6.02e-20	1.43e-17	yes	up	_	_	_
c8663_g1	41.69	1.52	-4.69	8.07e-20	1.91e-17	yes	down	K13947	PIN	_
c63540_g1	0.45	480.2	9.76	1.43e-19	3.35e-17	yes	up	K17991	PXG	path:ko00073
c48589_g1	0.59	72.01	6.7	1.57e-19	3.65e-17	yes	up	K11723	BRD7_9	_
c63028_g1	16.99	0.16	-6.05	1.58e-19	3.65e-17	yes	down	K00430	E1.11.1.7	path:ko00940;path:ko01100;path:ko01110
c108686_g1	238.68	8.28	-4.83	1.77e-19	4.08e-17	yes	down	K02721	psbW	path:ko00195;path:ko01100
c58369_g3	23.51	0.49	-5.33	1.79e-19	4.1e-17	yes	down	_	_	_
c40343_g1	540.93	33.1	-4.03	1.88e-19	4.27e-17	yes	down	K03541	psbR	path:ko00195;path:ko01100
c31418_g1	0.38	101.54	7.72	1.93e-19	4.35e-17	yes	up	K00507	SCD, desC	path:ko01040;path:ko01212;path:ko03320;path:ko04152;path:ko04212
c36941_g1	242.19	8.6	-4.8	2e-19	4.48e-17	yes	down	K02639	petF	path:ko00195
c66000_g2	88.24	3.44	-4.64	2.1e-19	4.66e-17	yes	down	K02716	psbO	path:ko00195;path:ko01100
c69518_g1	83.11	3.06	-4.72	2.1e-19	4.66e-17	yes	down	K02641	petH	path:ko00195;path:ko01100
c65665_g2	0.01	3.3	4.89	2.23e-19	4.93e-17	yes	up	_	_	_
c56642_g1	0.17	17.21	5.98	2.51e-19	5.51e-17	yes	up	_	_	_
c59099_g1	0.03	231.37	10.81	2.74e-19	5.96e-17	yes	up	_	_	_
c50954_g1	13.91	0.13	-5.93	3.13e-19	6.78e-17	yes	down	K18881	DJ1D	path:ko00620;path:ko01120
c70446_g2	31.59	2.12	-3.83	3.15e-19	6.78e-17	yes	down	K09338	HD-ZIP	_
c8612_g1	43.11	1.54	-4.72	3.69e-19	7.9e-17	yes	down	K01051	E3.1.1.11	path:ko00040;path:ko00500;path:ko01100
c67713_g1	80.23	6.94	-3.51	4.42e-19	9.4e-17	yes	down	_	_	_
c69710_g1	22.9	0.29	-5.87	4.59e-19	9.72e-17	yes	down	K03327	TC.MATE, SLC47A, norM, mdtK, dinF	_
c67558_g2	13.36	417.4	4.96	4.74e-19	9.98e-17	yes	up	K16298	SCPL-IV	_
c64944_g2	0.54	22.48	5.13	5.44e-19	1.14e-16	yes	up	K07904	RAB11A	path:ko04144;path:ko04961;path:ko04962;path:ko04972
c70597_g3	5.54	0	-5.82	6.91e-19	1.44e-16	yes	down	K13356	FAR	path:ko00073;path:ko04146;path:ko04212
c71388_g2	0.28	68.11	7.49	7.86e-19	1.63e-16	yes	up	_	_	_
c68566_g1	72.75	3.12	-4.5	8.08e-19	1.66e-16	yes	down	_	_	_
c70777_g2	13.37	0.06	-6.37	8.13e-19	1.66e-16	yes	down	K18108	E4.2.3.111	path:ko00902;path:ko01100;path:ko01110
c58138_g1	18.95	0.51	-4.97	8.16e-19	1.66e-16	yes	down	K00434	E1.11.1.11	path:ko00053;path:ko00480
c40744_g2	0	15.58	7.29	8.37e-19	1.69e-16	yes	up	K01188	E3.2.1.21	path:ko00460;path:ko00500;path:ko00940;path:ko01100;path:ko01110
c61346_g1	55.29	0.93	-5.75	9.55e-19	1.92e-16	yes	down	K01184	E3.2.1.15	path:ko00040;path:ko00500;path:ko01100
c51176_g1	5.66	0.01	-5.69	9.82e-19	1.97e-16	yes	down	_	_	_
c59766_g1	28.29	0.05	-7.53	9.95e-19	1.98e-16	yes	down	_	_	_
c69153_g1	13.31	0.06	-6.43	1.02e-18	2.01e-16	yes	down	K01051	E3.1.1.11	path:ko00040;path:ko00500;path:ko01100
c67117_g3	31.34	0.39	-6.01	1.03e-18	2.03e-16	yes	down	K14638	SLC15A3_4, PHT	_
c9099_g2	0	41.32	8.69	1.04e-18	2.04e-16	yes	up	_	_	_
c61557_g1	52.2	2.03	-4.61	1.6e-18	3.11e-16	yes	down	_	_	_
c8631_g1	1.49	344.64	7.76	1.64e-18	3.17e-16	yes	up	K02256	COX1	path:ko00190;path:ko01100;path:ko04260;path:ko04932;path:ko05010;path:ko05012;path:ko05016
c51872_g1	41.97	3.22	-3.66	2.02e-18	3.89e-16	yes	down	K01761	E4.4.1.11	path:ko00270;path:ko00450
c60279_g1	3.71	2813.61	9.53	2.16e-18	4.13e-16	yes	up	_	_	_
c38048_g1	32.25	1.46	-4.37	2.44e-18	4.65e-16	yes	down	_	_	_
c41722_g1	2.29	68.03	4.83	2.46e-18	4.67e-16	yes	up	K07407	E3.2.1.22B, galA, rafA	path:ko00052;path:ko00561;path:ko00600;path:ko00603
c69127_g2	0	25.04	7.97	2.72e-18	5.14e-16	yes	up	_	_	_
c67456_g2	4.3	0.06	-4.8	2.87e-18	5.38e-16	yes	down	K13496	UGT73C	path:ko01110
c67161_g1	166.03	0.32	-8.63	3.33e-18	6.17e-16	yes	down	_	_	_
c43204_g1	61.43	1.29	-5.46	3.33e-18	6.17e-16	yes	down	_	_	_
c65271_g1	82.34	3.18	-4.65	3.34e-18	6.17e-16	yes	down	K02693	psaE	path:ko00195;path:ko01100
c70555_g1	444.79	9.08	-5.6	3.46e-18	6.36e-16	yes	down	_	_	_
c62828_g2	9.89	177.97	4.16	3.58e-18	6.55e-16	yes	up	K07300	chaA, CAX	_
c37699_g1	18.23	0.27	-5.62	4.61e-18	8.4e-16	yes	down	_	_	_
c55838_g1	27.03	0.04	-7.57	4.82e-18	8.73e-16	yes	down	_	_	_
c67062_g1	0.46	34.79	5.97	5.3e-18	9.56e-16	yes	up	K16903	TAA1	path:ko00380;path:ko01100
c61767_g1	2.59	47.77	4.15	5.33e-18	9.58e-16	yes	up	_	_	_
c68317_g1	0.03	18.47	7.14	5.65e-18	1.01e-15	yes	up	_	_	_
c71441_g1	0	11.28	6.83	5.83e-18	1.04e-15	yes	up	_	_	_
c70271_g1	0.02	13.77	6.85	5.98e-18	1.06e-15	yes	up	_	_	_
c40247_g1	6.94	0.04	-5.65	6e-18	1.06e-15	yes	down	_	_	_
c54392_g1	9.84	0	-6.63	6.26e-18	1.1e-15	yes	down	_	_	_
c68931_g1	7.45	0.03	-5.83	6.56e-18	1.14e-15	yes	down	_	_	_
c42488_g1	35.08	2.03	-4.05	6.79e-18	1.18e-15	yes	down	K02115	ATPF1G, atpG	path:ko00190;path:ko00195;path:ko01100
c69979_g1	24.12	1.81	-3.66	1.05e-17	1.81e-15	yes	down	_	_	_
c46885_g1	10.16	0	-6.68	1.08e-17	1.85e-15	yes	down	_	_	_
c86866_g1	0.02	9.87	6.41	1.21e-17	2.07e-15	yes	up	_	_	_
c47198_g2	13.01	0.27	-5.14	1.24e-17	2.12e-15	yes	down	_	_	_
c72018_g1	128.36	2.33	-5.72	1.25e-17	2.13e-15	yes	down	_	_	_
c66564_g1	20.32	0.59	-4.89	1.61e-17	2.72e-15	yes	down	_	_	_
c66548_g1	0.38	22.57	5.57	1.81e-17	3.04e-15	yes	up	K09422	MYBP	_
c4590_g1	13.41	0.44	-4.64	2.11e-17	3.53e-15	yes	down	_	_	_
c28932_g1	252.14	7.22	-5.11	3.07e-17	5.11e-15	yes	down	K02692	psaD	path:ko00195;path:ko01100
c66373_g3	2.12	112.15	5.66	4.31e-17	7.14e-15	yes	up	K10999	CESA	_
c49068_g2	340.16	15.64	-4.43	5.3e-17	8.75e-15	yes	down	K09872	PIP	_
c1534_g1	261.4	6.72	-5.26	6e-17	9.85e-15	yes	down	K02699	psaL	path:ko00195;path:ko01100
c67954_g1	1.27	40.09	4.88	6.04e-17	9.87e-15	yes	up	K11314	TADA2A, ADA2	_
c70601_g1	81.61	1.86	-5.38	6.41e-17	1.04e-14	yes	down	K02694	psaF	path:ko00195;path:ko01100
c48589_g2	0.97	83.14	6.28	7.31e-17	1.18e-14	yes	up	_	_	_
c65033_g2	26.12	0.7	-5.03	8.58e-17	1.38e-14	yes	down	K07735	algH	_
c62583_g1	5.73	272.45	5.55	8.68e-17	1.39e-14	yes	up	_	_	_
c64345_g1	27.52	0.3	-6.13	9.67e-17	1.55e-14	yes	down	_	_	_
c64088_g1	0.07	246.77	10.46	9.75e-17	1.55e-14	yes	up	_	_	_
c48884_g1	0.03	9.63	6.2	1.03e-16	1.63e-14	yes	up	_	_	_
c52297_g1	45.65	0.18	-7.35	1.08e-16	1.7e-14	yes	down	_	_	_
c31962_g1	0.21	9.95	5	1.17e-16	1.84e-14	yes	up	_	_	_
c30742_g1	21.18	1.44	-3.79	1.46e-16	2.29e-14	yes	down	K03841	FBP, fbp	path:ko00010;path:ko00030;path:ko00051;path:ko00680;path:ko00710;path:ko01100;path:ko01110;path:ko01120;path:ko01130;path:ko01200;path:ko04152;path:ko04910
c62745_g4	53.28	3.34	-3.96	1.51e-16	2.35e-14	yes	down	K09338	HD-ZIP	_
c60300_g3	13.16	1.28	-3.26	1.53e-16	2.37e-14	yes	down	_	_	_
c79656_g1	27.06	1.42	-4.16	1.53e-16	2.37e-14	yes	down	_	_	_
c27366_g1	0.49	423.86	9.5	1.69e-16	2.59e-14	yes	up	_	_	_
c63699_g1	0.18	19.95	6.18	1.75e-16	2.68e-14	yes	up	K01051	E3.1.1.11	path:ko00040;path:ko00500;path:ko01100
c22456_g1	52.6	0.58	-6.27	1.77e-16	2.7e-14	yes	down	_	_	_
c17820_g2	58.69	1.81	-4.95	1.85e-16	2.81e-14	yes	down	K02639	petF	path:ko00195
c16121_g1	67.36	5.07	-3.71	2.25e-16	3.39e-14	yes	down	_	_	_
c66509_g2	9.17	0.05	-5.92	2.25e-16	3.39e-14	yes	down	_	_	_
c68192_g1	0.47	23.59	5.37	2.3e-16	3.45e-14	yes	up	_	_	_
c58331_g2	20.36	0.46	-5.2	2.36e-16	3.53e-14	yes	down	_	_	_
c32058_g1	30.89	1.23	-4.54	2.39e-16	3.56e-14	yes	down	_	_	_
c52297_g2	39.48	0	-8.63	2.69e-16	3.98e-14	yes	down	_	_	_
c53446_g1	18.78	0	-7.56	2.7e-16	3.98e-14	yes	down	_	_	_
c71252_g2	4.75	0	-5.6	2.92e-16	4.3e-14	yes	down	_	_	_
c49689_g1	22.2	0.05	-7.23	3.42e-16	5.01e-14	yes	down	_	_	_
c47219_g1	0.01	7.62	6.1	3.62e-16	5.28e-14	yes	up	K11252	H2B	path:ko05034;path:ko05203;path:ko05322
c61225_g1	0.35	25.89	5.85	3.64e-16	5.29e-14	yes	up	_	_	_
c12169_g1	0.33	298.25	9.45	3.77e-16	5.46e-14	yes	up	K11188	PRDX6	path:ko00940;path:ko01100;path:ko01110
c108634_g1	34.24	0.73	-5.38	3.81e-16	5.49e-14	yes	down	_	_	_
c63157_g3	193.33	0.64	-8.02	4.33e-16	6.22e-14	yes	down	_	_	_
c65545_g1	3.39	133.1	5.25	4.37e-16	6.25e-14	yes	up	K00679	E2.3.1.158	path:ko00561
c71209_g3	6.47	0	-6.04	4.46e-16	6.35e-14	yes	down	K09422	MYBP	_
c56886_g1	0.47	70.5	6.94	4.5e-16	6.38e-14	yes	up	_	_	_
c38008_g1	9.79	0.08	-5.82	5.09e-16	7.19e-14	yes	down	_	_	_
c52649_g1	10.48	0.22	-5.06	5.14e-16	7.24e-14	yes	down	K17609	NXN	_
c71790_g1	18.6	1.26	-3.78	5.42e-16	7.61e-14	yes	down	_	_	_
c64083_g2	121.49	5.67	-4.4	5.83e-16	8.15e-14	yes	down	_	_	_
c17777_g1	1.83	36.68	4.25	6.64e-16	9.24e-14	yes	up	K01285	PRCP	path:ko04614;path:ko04974
c37550_g1	79.41	5.26	-3.89	6.88e-16	9.55e-14	yes	down	_	_	_
c34930_g1	26.55	1.13	-4.44	7.34e-16	1.01e-13	yes	down	_	_	_
c47811_g1	1.18	1101	9.75	7.43e-16	1.02e-13	yes	up	_	_	_
c67523_g1	9.93	0.1	-5.63	7.62e-16	1.04e-13	yes	down	_	_	_
c47531_g1	223.89	8.86	-4.64	7.86e-16	1.07e-13	yes	down	_	_	_
c54318_g1	13.04	0.14	-5.8	7.99e-16	1.09e-13	yes	down	_	_	_
c48747_g2	0.19	45.92	7.31	8.52e-16	1.16e-13	yes	up	K07052	K07052	_
c422_g1	11.24	140.38	3.63	8.82e-16	1.19e-13	yes	up	K01951	guaA, GMPS	path:ko00230;path:ko00983;path:ko01100
c49068_g1	428.09	20.21	-4.4	9.08e-16	1.22e-13	yes	down	K09872	PIP	_
c11358_g1	0.09	8.37	5.51	1.03e-15	1.38e-13	yes	up	K19355	MAN	path:ko00051
c41022_g1	1.82	49.79	4.7	1.08e-15	1.44e-13	yes	up	_	_	_
c71388_g4	28.5	355.62	3.64	1.09e-15	1.45e-13	yes	up	K00108	betA, CHDH	path:ko00260;path:ko01100
c34549_g1	23.12	0.98	-4.42	1.13e-15	1.49e-13	yes	down	K09264	K09264	_
c70798_g1	0.15	16.77	6.08	1.26e-15	1.67e-13	yes	up	_	_	_
c67779_g1	1.98	11243.6	12.4	1.31e-15	1.73e-13	yes	up	_	_	_
c65089_g1	1.97	3935.21	10.89	1.55e-15	2.04e-13	yes	up	_	_	_
c34083_g1	28.86	1.08	-4.62	1.56e-15	2.05e-13	yes	down	_	_	_
c64558_g1	0.22	16.63	5.69	1.61e-15	2.1e-13	yes	up	_	_	_
c71983_g1	3.92	110.2	4.78	1.63e-15	2.11e-13	yes	up	_	_	_
c70471_g6	24.3	2.44	-3.27	1.69e-15	2.19e-13	yes	down	K00051	E1.1.1.82	path:ko00620;path:ko00710;path:ko01100;path:ko01120;path:ko01200
c48199_g1	13.08	0	-7.04	1.78e-15	2.29e-13	yes	down	_	_	_
c74506_g1	45.89	0.15	-7.51	1.85e-15	2.38e-13	yes	down	_	_	_
c36707_g1	0.09	446.58	11.23	2.19e-15	2.8e-13	yes	up	K00507	SCD, desC	path:ko01040;path:ko01212;path:ko03320;path:ko04152;path:ko04212
c55819_g1	0.02	21.55	7.48	2.28e-15	2.9e-13	yes	up	_	_	_
c56456_g1	3.42	0.05	-4.55	2.3e-15	2.93e-13	yes	down	K12125	ELF3	path:ko04712
c21690_g1	58.62	0.92	-5.85	2.39e-15	3.03e-13	yes	down	K00218	E1.3.1.33, por	path:ko00860;path:ko01100;path:ko01110
c66902_g2	10.32	0.8	-3.54	2.53e-15	3.19e-13	yes	down	K13947	PIN	_
c58835_g1	32.75	1.98	-3.98	2.57e-15	3.24e-13	yes	down	K02291	crtB	path:ko00906;path:ko01100;path:ko01110
c68532_g1	0.56	54.98	6.38	2.59e-15	3.24e-13	yes	up	_	_	_
c66902_g3	0	11.4	6.85	2.69e-15	3.36e-13	yes	up	K13947	PIN	_
c59069_g1	20.16	0.96	-4.26	2.7e-15	3.37e-13	yes	down	_	_	_
c61964_g1	1.17	25.66	4.34	2.91e-15	3.61e-13	yes	up	_	_	_
c64532_g1	28.16	1.05	-4.62	3.25e-15	4.02e-13	yes	down	_	_	_
c58214_g1	15.57	0.09	-6.35	3.27e-15	4.04e-13	yes	down	K01183	E3.2.1.14	path:ko00520;path:ko01100
c64321_g7	33.25	3.82	-3.09	3.41e-15	4.19e-13	yes	down	_	_	_
c63076_g1	89.66	5.48	-4.01	3.56e-15	4.36e-13	yes	down	K15404	K15404, CER1	path:ko00073;path:ko01110
c66303_g2	17.71	736.74	5.37	3.6e-15	4.4e-13	yes	up	K03921	DESA1	path:ko00061;path:ko01040;path:ko01212
c64888_g1	6.28	70.7	3.47	3.67e-15	4.47e-13	yes	up	_	_	_
c69484_g1	0.07	61.03	8.52	3.79e-15	4.6e-13	yes	up	K09755	CYP84A, F5H	path:ko00940;path:ko01100;path:ko01110
c66916_g1	3.39	0.03	-4.72	3.86e-15	4.66e-13	yes	down	K18810	CYCD1_2_4	_
c66889_g1	0.1	72.67	8.48	4.09e-15	4.93e-13	yes	up	_	_	_
c47287_g1	0.13	15.44	6.07	4.85e-15	5.83e-13	yes	up	_	_	_
c56369_g1	83.22	5.26	-3.96	5.02e-15	5.99e-13	yes	down	_	_	_
c36774_g1	42.76	3.25	-3.68	5.02e-15	5.99e-13	yes	down	K10257	FAD8, desB	path:ko01040;path:ko01212
c67191_g1	5.24	80.9	3.92	5.09e-15	6.05e-13	yes	up	_	_	_
c65530_g2	0	14.73	7.21	5.54e-15	6.57e-13	yes	up	K09422	MYBP	_
c69160_g5	1.08	23.9	4.35	5.68e-15	6.71e-13	yes	up	K16903	TAA1	path:ko00380;path:ko01100
c24124_g1	119.93	3.76	-4.96	5.73e-15	6.75e-13	yes	down	K02701	psaN	path:ko00195;path:ko01100
c17044_g1	7.12	0.09	-5.23	5.78e-15	6.79e-13	yes	down	_	_	_
c39750_g2	33.45	0.37	-6.17	6.04e-15	7.07e-13	yes	down	K15404	K15404, CER1	path:ko00073;path:ko01110
c61256_g1	5.55	0	-5.82	6.72e-15	7.83e-13	yes	down	_	_	_
c49802_g1	8.42	0	-6.41	6.74e-15	7.83e-13	yes	down	K00430	E1.11.1.7	path:ko00940;path:ko01100;path:ko01110
c71242_g1	4.04	0	-5.37	7.03e-15	8.14e-13	yes	down	_	_	_
c71258_g1	19.94	0.39	-5.36	7.7e-15	8.89e-13	yes	down	_	_	_
c69788_g1	0.01	18.6	7.43	8.03e-15	9.25e-13	yes	up	_	_	_
c72775_g1	0	29.91	8.23	8.79e-15	1.01e-12	yes	up	_	_	_
c70730_g1	133.8	3.5	-5.22	8.91e-15	1.02e-12	yes	down	K00218	E1.3.1.33, por	path:ko00860;path:ko01100;path:ko01110
c69869_g1	0.01	131.9	10.2	9.08e-15	1.04e-12	yes	up	_	_	_
c8692_g1	6.76	0.09	-5.2	9.23e-15	1.05e-12	yes	down	K12338	UGT75C1	path:ko00942
c25427_g2	24.06	1.48	-3.93	9.84e-15	1.12e-12	yes	down	_	_	_
c59703_g1	85.11	1.93	-5.39	1.05e-14	1.18e-12	yes	down	_	_	_
c42811_g1	0.02	180.28	10.61	1.13e-14	1.28e-12	yes	up	_	_	_
c62070_g1	8.86	0.1	-5.47	1.14e-14	1.28e-12	yes	down	K00430	E1.11.1.7	path:ko00940;path:ko01100;path:ko01110
c52769_g1	0.02	11.74	6.65	1.16e-14	1.3e-12	yes	up	_	_	_
c69146_g1	12.89	0.46	-4.53	1.17e-14	1.31e-12	yes	down	_	_	_
c63419_g1	19.6	0.84	-4.38	1.27e-14	1.41e-12	yes	down	_	_	_
c50538_g1	0	8.01	6.34	1.33e-14	1.47e-12	yes	up	_	_	_
c8701_g1	15.43	0.18	-5.81	1.4e-14	1.54e-12	yes	down	_	_	_
c63048_g1	88.46	6.19	-3.82	1.43e-14	1.58e-12	yes	down	K15283	SLC35E1	_
c52467_g2	0.48	15.99	4.8	1.5e-14	1.65e-12	yes	up	_	_	_
c109090_g1	38.26	1.81	-4.33	1.52e-14	1.66e-12	yes	down	_	_	_
c69574_g3	36.83	560.24	3.92	1.59e-14	1.74e-12	yes	up	K16297	SCPL-II	_
c66000_g1	159.59	5.03	-4.96	1.65e-14	1.8e-12	yes	down	K02716	psbO	path:ko00195;path:ko01100
c81339_g1	2.07	187.17	6.43	1.74e-14	1.9e-12	yes	up	_	_	_
c108942_g1	1.43	52.94	5.12	1.8e-14	1.95e-12	yes	up	K00430	E1.11.1.7	path:ko00940;path:ko01100;path:ko01110
c31418_g3	0.29	51.79	7.07	1.86e-14	2.01e-12	yes	up	_	_	_
c57138_g1	0.66	21.5	4.84	2e-14	2.15e-12	yes	up	_	_	_
c51690_g1	16.3	0.1	-6.35	2.01e-14	2.16e-12	yes	down	K00422	E1.10.3.1	path:ko00350;path:ko00950;path:ko01100;path:ko01110
c57776_g1	2.8	0.01	-4.74	2.03e-14	2.17e-12	yes	down	K13508	GPAT	path:ko00561;path:ko00564;path:ko01100;path:ko01110
c58144_g1	37.28	1.49	-4.56	2.04e-14	2.18e-12	yes	down	_	_	_
c68043_g1	12.66	0.35	-4.82	2.12e-14	2.26e-12	yes	down	K13066	E2.1.1.68, COMT	path:ko00940;path:ko01100;path:ko01110
c16482_g1	226.63	7.51	-4.9	2.39e-14	2.54e-12	yes	down	K02695	psaH	path:ko00195;path:ko01100
c20320_g1	16.26	0.22	-5.66	2.61e-14	2.76e-12	yes	down	_	_	_
c40527_g1	0.02	189.56	10.57	2.85e-14	3e-12	yes	up	_	_	_
c69048_g1	325.49	5.5	-5.86	2.99e-14	3.15e-12	yes	down	K09873	TIP	_
c63950_g1	1.7	32.07	4.16	3.23e-14	3.39e-12	yes	up	_	_	_
c90408_g1	0	18.6	7.55	3.29e-14	3.45e-12	yes	up	_	_	_
c56886_g2	0.34	42.1	6.58	3.41e-14	3.55e-12	yes	up	_	_	_
c67722_g1	12.78	0.56	-4.28	3.75e-14	3.9e-12	yes	down	_	_	_
c58764_g2	0.33	22.82	5.74	4.23e-14	4.39e-12	yes	up	K04125	E1.14.11.13	path:ko00904
c27405_g1	4.82	0.08	-4.81	4.39e-14	4.54e-12	yes	down	_	_	_
c72656_g1	14.17	0.15	-5.84	4.52e-14	4.66e-12	yes	down	_	_	_
c68472_g2	91.06	878.15	3.27	4.58e-14	4.71e-12	yes	up	K01611	speD, AMD1	path:ko00270;path:ko00330;path:ko01100
c61679_g1	51.41	2.3	-4.43	5e-14	5.13e-12	yes	down	_	_	_
c68840_g1	3.64	0.05	-4.67	5.08e-14	5.19e-12	yes	down	_	_	_
c37462_g1	1.08	168.79	7.16	5.09e-14	5.19e-12	yes	up	K13993	HSP20	path:ko04141
c67932_g2	3.92	0.02	-5.09	5.2e-14	5.29e-12	yes	down	_	_	_
c56222_g1	4.69	46.12	3.27	5.28e-14	5.36e-12	yes	up	K00430	E1.11.1.7	path:ko00940;path:ko01100;path:ko01110
c66509_g4	9.81	0.68	-3.67	5.5e-14	5.56e-12	yes	down	_	_	_
c56400_g1	82.7	3.25	-4.63	5.56e-14	5.61e-12	yes	down	_	_	_
c61171_g1	12.09	205.03	4.07	5.78e-14	5.82e-12	yes	up	K07025	K07025	_
c62717_g1	142.96	9.09	-3.96	5.86e-14	5.87e-12	yes	down	_	_	_
c71429_g1	8.61	0.14	-5.18	6.29e-14	6.3e-12	yes	down	_	_	_
c70648_g5	5.7	0.16	-4.46	6.42e-14	6.41e-12	yes	down	K14638	SLC15A3_4, PHT	_
c52343_g1	0.5	16.74	4.82	6.57e-14	6.54e-12	yes	up	K09422	MYBP	_
c69127_g1	0	34.61	8.44	6.91e-14	6.85e-12	yes	up	_	_	_
c32449_g1	6.1	0.02	-5.69	7.02e-14	6.94e-12	yes	down	K09285	OVM, ANT	_
c70627_g1	0.73	11.24	3.78	7.07e-14	6.98e-12	yes	up	_	_	_
c73091_g1	28.23	0.91	-4.8	7.28e-14	7.16e-12	yes	down	_	_	_
c62828_g1	11.49	161.99	3.81	7.44e-14	7.31e-12	yes	up	K07300	chaA, CAX	_
c69739_g1	7.29	0.07	-5.41	7.54e-14	7.39e-12	yes	down	_	_	_
c60673_g3	12.99	0.17	-5.6	7.76e-14	7.58e-12	yes	down	_	_	_
c29221_g1	9.36	0.08	-5.73	7.88e-14	7.67e-12	yes	down	_	_	_
c34548_g1	0.14	28.39	6.88	8.1e-14	7.87e-12	yes	up	_	_	_
c65225_g1	84.85	2.35	-5.12	8.23e-14	7.97e-12	yes	down	K05298	GAPA	path:ko00710;path:ko01100;path:ko01120;path:ko01200
c8588_g1	54.29	997.2	4.2	8.51e-14	8.22e-12	yes	up	K03921	DESA1	path:ko00061;path:ko01040;path:ko01212
c24606_g1	0.03	136.97	10.09	8.74e-14	8.42e-12	yes	up	_	_	_
c70438_g1	8.41	0.19	-4.89	9.45e-14	9.09e-12	yes	down	K15718	LOX1_5	path:ko00591
c63409_g2	4.94	0.18	-4.17	9.59e-14	9.19e-12	yes	down	_	_	_
c61560_g1	9.71	110.06	3.49	9.69e-14	9.27e-12	yes	up	K18551	SDT1	path:ko00760
c61455_g3	22.04	0.83	-4.57	9.75e-14	9.3e-12	yes	down	_	_	_
c62284_g1	1.77	44.23	4.57	9.86e-14	9.38e-12	yes	up	_	_	_
c70499_g1	53.43	5.15	-3.35	1.01e-13	9.55e-12	yes	down	K02638	petE	path:ko00195
c62414_g1	4.36	0.04	-5	1.06e-13	1e-11	yes	down	_	_	_
c66175_g1	52.12	680.29	3.7	1.1e-13	1.04e-11	yes	up	_	_	_
c39249_g1	9.86	0.11	-5.59	1.16e-13	1.09e-11	yes	down	K01728	pel	path:ko00040
c71069_g1	0.23	7.62	4.56	1.16e-13	1.09e-11	yes	up	_	_	_
c48254_g1	152.68	14.46	-3.39	1.18e-13	1.1e-11	yes	down	_	_	_
c70367_g1	12.02	0.69	-3.94	1.23e-13	1.15e-11	yes	down	_	_	_
c73404_g1	71.27	6.78	-3.37	1.26e-13	1.18e-11	yes	down	_	_	_
c16199_g2	25.48	1.43	-4.06	1.33e-13	1.24e-11	yes	down	_	_	_
c38725_g1	0.13	16.13	6.13	1.4e-13	1.3e-11	yes	up	_	_	_
c69006_g1	2.4	20.97	3.07	1.41e-13	1.3e-11	yes	up	_	_	_
c69643_g1	1.25	64.07	5.57	1.43e-13	1.32e-11	yes	up	K19041	RNF38_44	_
c4316_g1	15.22	0.14	-6.01	1.44e-13	1.33e-11	yes	down	_	_	_
c59529_g1	0.68	55.5	6.15	1.5e-13	1.37e-11	yes	up	_	_	_
c54730_g3	0.89	97.35	6.62	1.53e-13	1.4e-11	yes	up	_	_	_
c52512_g1	43.87	4.51	-3.25	1.56e-13	1.42e-11	yes	down	K14638	SLC15A3_4, PHT	_
c8525_g2	0.33	1318.44	11.6	1.6e-13	1.46e-11	yes	up	K09873	TIP	_
c25737_g1	81.36	2.97	-4.73	1.63e-13	1.49e-11	yes	down	K08910	LHCA4	path:ko00196
c50003_g1	28.44	357.68	3.65	1.69e-13	1.53e-11	yes	up	_	_	_
c70752_g1	0.79	14.77	4.06	1.77e-13	1.6e-11	yes	up	_	_	_
c71697_g2	13.19	2.08	-2.61	1.81e-13	1.63e-11	yes	down	_	_	_
c66959_g3	9.66	0.14	-5.34	1.89e-13	1.7e-11	yes	down	K12235	SRR	path:ko00260
c49441_g1	9.86	0.69	-3.66	1.92e-13	1.72e-11	yes	down	K14640	SLC20A, PIT	_
c52673_g1	0	4.29	5.46	2.01e-13	1.8e-11	yes	up	_	_	_
c68091_g1	21.72	1.71	-3.59	2.04e-13	1.82e-11	yes	down	K06892	F6H1	_
c60976_g1	0.1	8.29	5.43	2.04e-13	1.82e-11	yes	up	_	_	_
c61785_g1	0.01	5.45	5.6	2.2e-13	1.95e-11	yes	up	_	_	_
c61318_g1	34.08	0.96	-5.02	2.31e-13	2.05e-11	yes	down	K01100	E3.1.3.37	path:ko00710;path:ko01100;path:ko01120;path:ko01200
c28341_g1	5.87	0	-5.9	2.47e-13	2.19e-11	yes	down	_	_	_
c71910_g1	0.03	11.76	6.48	2.52e-13	2.22e-11	yes	up	_	_	_
c102294_g1	14.86	0.71	-4.2	2.58e-13	2.27e-11	yes	down	K02639	petF	path:ko00195
c56508_g1	4.76	0.06	-4.89	2.6e-13	2.29e-11	yes	down	K01213	E3.2.1.67	path:ko00040;path:ko00500;path:ko01100
c51054_g1	3.4	0	-5.13	2.72e-13	2.38e-11	yes	down	_	_	_
c49333_g1	187.61	27.1	-2.79	2.83e-13	2.48e-11	yes	down	K02636	petC	path:ko00195;path:ko01100
c61529_g1	79.2	10.98	-2.84	2.88e-13	2.51e-11	yes	down	_	_	_
c55637_g1	33.32	3.94	-3.05	2.91e-13	2.53e-11	yes	down	_	_	_
c68709_g1	2.33	0	-4.61	2.98e-13	2.59e-11	yes	down	_	_	_
c65213_g1	2.34	147.65	5.92	3.02e-13	2.61e-11	yes	up	K01638	E2.3.3.9, aceB, glcB	path:ko00620;path:ko00630;path:ko01100;path:ko01110;path:ko01120;path:ko01200
c66790_g3	1.22	55.66	5.4	3.08e-13	2.66e-11	yes	up	K10999	CESA	_
c60751_g1	0.04	4.98	5.21	3.22e-13	2.78e-11	yes	up	_	_	_
c65435_g6	49.15	5.9	-3.04	3.29e-13	2.83e-11	yes	down	K13679	WAXY	_
c54973_g1	7.82	0.48	-3.76	3.32e-13	2.84e-11	yes	down	K12640	CYP85A2, BR6OX2	path:ko00905;path:ko01100;path:ko01110
c59028_g1	119.66	1136.47	3.25	3.35e-13	2.86e-11	yes	up	_	_	_
c68079_g1	7.27	0.24	-4.43	3.44e-13	2.94e-11	yes	down	_	_	_
c47320_g1	98.54	6.22	-3.97	3.5e-13	2.98e-11	yes	down	K09873	TIP	_
c48747_g1	0.1	15.04	6.27	3.51e-13	2.98e-11	yes	up	K07052	K07052	_
c70128_g1	0.38	22.34	5.55	3.59e-13	3.04e-11	yes	up	K14829	IPI3	_
c59364_g1	74.7	2.18	-5.03	3.61e-13	3.05e-11	yes	down	_	_	_
c57222_g1	6.54	0.14	-4.78	3.64e-13	3.07e-11	yes	down	_	_	_
c66983_g2	2.44	0	-4.66	3.88e-13	3.27e-11	yes	down	_	_	_
c64793_g1	0.11	7.85	5.23	3.89e-13	3.27e-11	yes	up	K14638	SLC15A3_4, PHT	_
c41522_g1	3.52	89.55	4.63	3.97e-13	3.32e-11	yes	up	K03453	TC.BASS	_
c63972_g1	13.32	0.24	-5.3	4.01e-13	3.35e-11	yes	down	K01728	pel	path:ko00040
c79478_g1	19.76	1.62	-3.53	4.09e-13	3.42e-11	yes	down	_	_	_
c51890_g2	5.82	0.08	-5.04	4.32e-13	3.59e-11	yes	down	K10775	E4.3.1.24	path:ko00360;path:ko00940;path:ko01100;path:ko01110
c71029_g6	13.92	0.5	-4.54	4.39e-13	3.65e-11	yes	down	_	_	_
c55842_g1	13.66	0.45	-4.64	4.44e-13	3.68e-11	yes	down	_	_	_
c71618_g1	9.54	64636.7	12.71	4.59e-13	3.79e-11	yes	up	_	_	_
c70502_g3	94.48	13.98	-2.75	4.6e-13	3.79e-11	yes	down	_	_	_
c18896_g1	35.89	2.52	-3.78	4.67e-13	3.84e-11	yes	down	K17525	CHID1	_
c48817_g1	149.81	3.16	-5.52	4.68e-13	3.84e-11	yes	down	_	_	_
c64716_g4	156.61	69875.4	8.8	5.01e-13	4.11e-11	yes	up	_	_	_
c68092_g1	0.75	42.68	5.66	5.05e-13	4.13e-11	yes	up	K19365	BSCL2	_
c70738_g3	42.54	4.27	-3.29	5.3e-13	4.32e-11	yes	down	_	_	_
c55113_g1	136.25	4.81	-4.79	5.42e-13	4.41e-11	yes	down	K08908	LHCA2	path:ko00196
c83234_g1	7.73	0	-6.29	5.46e-13	4.43e-11	yes	down	_	_	_
c60318_g4	15.11	0.37	-5	5.61e-13	4.55e-11	yes	down	_	_	_
c57429_g1	37.08	4.34	-3.07	5.89e-13	4.76e-11	yes	down	_	_	_
c66669_g3	10.55	130.05	3.61	6.02e-13	4.85e-11	yes	up	K08193	SLC17A	_
c5657_g1	8.1	0.07	-5.61	6.15e-13	4.95e-11	yes	down	_	_	_
c63512_g1	0.3	438.16	10.11	6.22e-13	5e-11	yes	up	_	_	_
c69070_g8	89.53	4.38	-4.32	6.7e-13	5.37e-11	yes	down	_	_	_
c68629_g4	0.02	8.38	6.16	6.76e-13	5.4e-11	yes	up	_	_	_
c8667_g1	10.07	0.26	-4.81	6.83e-13	5.45e-11	yes	down	_	_	_
c62557_g1	4.99	0.18	-4.17	6.85e-13	5.46e-11	yes	down	K18485	MYF6, MRF4	_
c56154_g1	118.58	16.26	-2.86	6.9e-13	5.48e-11	yes	down	K08235	E2.4.1.207	_
c31006_g1	19.99	0.22	-5.96	7.07e-13	5.6e-11	yes	down	_	_	_
c70133_g1	4.66	52.04	3.45	7.15e-13	5.66e-11	yes	up	K00306	PIPOX	path:ko00260;path:ko00310;path:ko01100;path:ko04146
c48015_g1	11.31	0.24	-5.07	7.24e-13	5.71e-11	yes	down	_	_	_
c58322_g2	6.05	0.03	-5.61	7.25e-13	5.71e-11	yes	down	K01051	E3.1.1.11	path:ko00040;path:ko00500;path:ko01100
c35118_g1	4.23	0.01	-5.25	7.37e-13	5.79e-11	yes	down	_	_	_
c32449_g2	7.36	0.18	-4.73	7.57e-13	5.93e-11	yes	down	K09285	OVM, ANT	_
c71749_g3	11.71	0.69	-3.9	7.82e-13	6.12e-11	yes	down	K13407	CYP94A1	path:ko00073
c47687_g1	5.24	0.02	-5.44	8.07e-13	6.3e-11	yes	down	_	_	_
c70291_g2	30.26	3.06	-3.26	8.2e-13	6.38e-11	yes	down	K14505	CYCD3	path:ko04075
c60924_g1	0.07	10	5.92	8.2e-13	6.38e-11	yes	up	K16277	DRIP	_
c60068_g1	6.49	0.46	-3.55	8.24e-13	6.4e-11	yes	down	_	_	_
c7570_g1	5.28	0	-5.75	8.49e-13	6.57e-11	yes	down	_	_	_
c64173_g1	22.48	1.59	-3.74	8.74e-13	6.75e-11	yes	down	K01051	E3.1.1.11	path:ko00040;path:ko00500;path:ko01100
c1399_g1	7.74	0.14	-5	9.08e-13	7e-11	yes	down	_	_	_
c67643_g2	2.54	19089.8	12.82	9.15e-13	7.04e-11	yes	up	_	_	_
c48320_g1	0	15.68	7.3	9.75e-13	7.49e-11	yes	up	_	_	_
c69171_g1	17.54	145.27	3.04	9.88e-13	7.57e-11	yes	up	K01689	ENO, eno	path:ko00010;path:ko00680;path:ko01100;path:ko01110;path:ko01120;path:ko01130;path:ko01200;path:ko01230;path:ko03018;path:ko04066
c66094_g2	13.47	1.08	-3.52	9.9e-13	7.57e-11	yes	down	_	_	_
c79771_g1	24.36	0.99	-4.49	1.01e-12	7.69e-11	yes	down	_	_	_
c68768_g1	1.65	165.68	6.57	1.04e-12	7.89e-11	yes	up	_	_	_
c109014_g1	5.09	167.46	5.01	1.08e-12	8.17e-11	yes	up	_	_	_
c66514_g1	0.01	3.38	4.95	1.09e-12	8.27e-11	yes	up	_	_	_
c65876_g1	25.12	3.35	-2.87	1.12e-12	8.46e-11	yes	down	K15639	CYP734A1, BAS1	path:ko00905
c54758_g1	3.82	0.01	-5.17	1.16e-12	8.73e-11	yes	down	K01179	E3.2.1.4	path:ko00500;path:ko01100
c69233_g10	41.88	5.7	-2.86	1.16e-12	8.73e-11	yes	down	_	_	_
c69451_g1	11.24	116.52	3.36	1.17e-12	8.78e-11	yes	up	K11252	H2B	path:ko05034;path:ko05203;path:ko05322
c62184_g1	8.32	0.09	-5.47	1.21e-12	9.06e-11	yes	down	K09873	TIP	_
c69031_g1	5.44	0.22	-4.11	1.24e-12	9.29e-11	yes	down	_	_	_
c58707_g1	0.09	4.61	4.6	1.26e-12	9.43e-11	yes	up	_	_	_
c68665_g2	7.22	85.37	3.55	1.27e-12	9.48e-11	yes	up	K14638	SLC15A3_4, PHT	_
c54741_g1	73.14	682.15	3.22	1.28e-12	9.52e-11	yes	up	_	_	_
c62058_g1	14.35	0.17	-5.73	1.28e-12	9.54e-11	yes	down	K06617	E2.4.1.82	path:ko00052
c55101_g1	0.06	5.85	5.26	1.31e-12	9.69e-11	yes	up	_	_	_
c62088_g1	9.62	0.17	-5.15	1.33e-12	9.85e-11	yes	down	K14709	SLC39A1_2_3, ZIP1_2_3	_
c84804_g1	20.82	0.07	-6.95	1.38e-12	1.02e-10	yes	down	_	_	_
c68157_g1	10.68	0.38	-4.48	1.38e-12	1.02e-10	yes	down	K17193	UGT79B1	path:ko00942
c80207_g1	170.73	3.41	-5.6	1.4e-12	1.03e-10	yes	down	K08905	psaG	path:ko00195;path:ko01100
c57777_g1	0.03	4.89	5.22	1.41e-12	1.03e-10	yes	up	K15015	SLC32A, VGAT	path:ko04721;path:ko04723;path:ko04727;path:ko05032;path:ko05033
c50003_g2	94.99	1346.85	3.82	1.41e-12	1.04e-10	yes	up	_	_	_
c70285_g6	9.91	0.67	-3.71	1.43e-12	1.05e-10	yes	down	_	_	_
c61179_g1	0.1	17.02	6.44	1.49e-12	1.09e-10	yes	up	_	_	_
c59657_g1	0.43	6851.38	13.67	1.5e-12	1.09e-10	yes	up	_	_	_
c56115_g1	51.07	2.15	-4.51	1.59e-12	1.15e-10	yes	down	_	_	_
c79962_g1	41.84	2.71	-3.9	1.65e-12	1.19e-10	yes	down	K13384	E2.1.1.140	path:ko00950;path:ko01100;path:ko01110
c68378_g1	8.2	67.17	3.02	1.73e-12	1.25e-10	yes	up	K13366	MPAO, PAO1	path:ko00330;path:ko00410;path:ko01100
c52154_g2	2.01	10763	12.32	1.74e-12	1.26e-10	yes	up	_	_	_
c5993_g1	8.55	0.05	-5.82	1.8e-12	1.3e-10	yes	down	_	_	_
c63395_g1	108.64	1.95	-5.73	1.84e-12	1.32e-10	yes	down	K00512	CYP17A	path:ko00140;path:ko01100;path:ko04913;path:ko04917
c47532_g1	22.54	3.44	-2.68	1.87e-12	1.34e-10	yes	down	_	_	_
c66373_g4	2	83.56	5.31	1.89e-12	1.35e-10	yes	up	K10999	CESA	_
c55416_g1	48.22	6.29	-2.92	1.9e-12	1.36e-10	yes	down	K07466	RFA1, RPA1, rpa	path:ko03030;path:ko03420;path:ko03430;path:ko03440;path:ko03460
c71894_g1	15.49	3.79	-2	1.95e-12	1.39e-10	yes	down	_	_	_
c5550_g1	11.45	0	-6.85	1.96e-12	1.4e-10	yes	down	_	_	_
c63424_g2	3.39	1201.65	8.43	1.97e-12	1.4e-10	yes	up	K01183	E3.2.1.14	path:ko00520;path:ko01100
c60145_g1	0.01	2.65	4.61	1.98e-12	1.4e-10	yes	up	_	_	_
c108810_g1	42.99	3.04	-3.78	2e-12	1.41e-10	yes	down	_	_	_
c65998_g1	1.78	23.75	3.66	2.02e-12	1.43e-10	yes	up	_	_	_
c17253_g1	2.16	426.61	7.56	2.13e-12	1.5e-10	yes	up	K13993	HSP20	path:ko04141
c56111_g1	201.02	7.4	-4.74	2.16e-12	1.52e-10	yes	down	K02717	psbP	path:ko00195;path:ko01100
c69116_g1	5.34	40694.7	12.87	2.16e-12	1.52e-10	yes	up	_	_	_
c64172_g1	40.39	5.25	-2.92	2.27e-12	1.59e-10	yes	down	K03564	BCP, PRXQ, DOT5	_
c61545_g1	18.74	0.08	-6.71	2.32e-12	1.62e-10	yes	down	_	_	_
c66201_g2	0.54	7.95	3.65	2.38e-12	1.67e-10	yes	up	_	_	_
c41499_g1	0.02	20.65	7.42	2.4e-12	1.68e-10	yes	up	K00615	E2.2.1.1, tktA, tktB	path:ko00030;path:ko00710;path:ko01051;path:ko01100;path:ko01110;path:ko01120;path:ko01130;path:ko01200;path:ko01230
c23463_g1	2.83	0.01	-4.75	2.47e-12	1.72e-10	yes	down	_	_	_
c61247_g2	4.29	45.84	3.39	2.57e-12	1.78e-10	yes	up	K00318	PRODH	path:ko00330;path:ko01100;path:ko01110;path:ko01130
c67643_g1	1.65	8020.41	12.16	2.69e-12	1.87e-10	yes	up	_	_	_
c319_g1	3.65	0	-5.23	2.71e-12	1.87e-10	yes	down	_	_	_
c46127_g1	29.65	2.8	-3.36	2.73e-12	1.89e-10	yes	down	_	_	_
c55883_g2	14.11	0	-7.15	2.75e-12	1.9e-10	yes	down	_	_	_
c48285_g1	2.38	0.04	-4.14	2.76e-12	1.9e-10	yes	down	K08900	BCS1	_
c68072_g1	6.21	0.38	-3.73	2.79e-12	1.92e-10	yes	down	K08193	SLC17A	_
c50175_g1	13.31	0.23	-5.33	2.83e-12	1.94e-10	yes	down	_	_	_
c62333_g1	3.58	0	-5.2	2.86e-12	1.96e-10	yes	down	_	_	_
c61923_g3	13.58	0.3	-5.11	2.89e-12	1.97e-10	yes	down	_	_	_
c50682_g1	11.75	0.26	-5.04	3.09e-12	2.11e-10	yes	down	_	_	_
c40460_g1	3.1	42.69	3.74	3.15e-12	2.14e-10	yes	up	_	_	_
c71443_g4	11.27	1.74	-2.63	3.27e-12	2.22e-10	yes	down	_	_	_
c68899_g1	0.48	168.23	8.19	3.27e-12	2.22e-10	yes	up	_	_	_
c70532_g6	7.28	0.15	-4.9	3.28e-12	2.22e-10	yes	down	_	_	_
c48743_g2	0.66	28.93	5.25	3.45e-12	2.33e-10	yes	up	K08486	STX1B_2_3	path:ko04130;path:ko04721
c69096_g1	0	4.51	5.53	3.47e-12	2.34e-10	yes	up	_	_	_
c55996_g2	171.68	22.73	-2.91	3.5e-12	2.36e-10	yes	down	K00522	FTH1	path:ko04978
c65148_g2	0.1	1352.95	12.7	3.73e-12	2.51e-10	yes	up	_	_	_
c26151_g2	9.38	81.47	3.1	4.34e-12	2.91e-10	yes	up	K09422	MYBP	_
c70594_g4	10.22	0.33	-4.58	4.37e-12	2.93e-10	yes	down	_	_	_
c51890_g1	8.08	0.32	-4.27	4.48e-12	2.99e-10	yes	down	K10775	E4.3.1.24	path:ko00360;path:ko00940;path:ko01100;path:ko01110
c55160_g1	0	27.64	8.12	4.55e-12	3.03e-10	yes	up	_	_	_
c68736_g2	2.56	0	-4.73	4.55e-12	3.03e-10	yes	down	K09843	E1.14.13.93	path:ko00906
c68539_g1	62.34	7.99	-2.95	4.63e-12	3.07e-10	yes	down	K01915	glnA, GLUL	path:ko00220;path:ko00250;path:ko00630;path:ko00910;path:ko01100;path:ko01120;path:ko01230;path:ko02020;path:ko04724;path:ko04727
c33355_g1	11.72	0.41	-4.53	5.02e-12	3.33e-10	yes	down	_	_	_
c31418_g2	1.03	116.3	6.69	5.18e-12	3.43e-10	yes	up	K00507	SCD, desC	path:ko01040;path:ko01212;path:ko03320;path:ko04152;path:ko04212
c67881_g2	17.22	0	-7.44	5.26e-12	3.48e-10	yes	down	_	_	_
c3801_g1	0.02	3.49	4.92	5.41e-12	3.57e-10	yes	up	_	_	_
c57859_g1	22.2	1.01	-4.33	5.43e-12	3.58e-10	yes	down	_	_	_
c55538_g4	21.58	1.74	-3.56	5.47e-12	3.6e-10	yes	down	_	_	_
c67315_g1	5.88	0.01	-5.71	5.49e-12	3.6e-10	yes	down	_	_	_
c26586_g1	3.74	0.02	-5.04	5.75e-12	3.77e-10	yes	down	_	_	_
c62960_g1	6.36	0.22	-4.34	5.82e-12	3.81e-10	yes	down	K14826	FPR3_4	_
c67513_g1	14.4	0.09	-6.27	5.95e-12	3.89e-10	yes	down	_	_	_
c56183_g1	6.17	0.02	-5.67	5.97e-12	3.89e-10	yes	down	_	_	_
c3383_g1	42.98	1.3	-4.94	6.1e-12	3.97e-10	yes	down	_	_	_
c70071_g1	0.04	5.6	5.31	6.22e-12	4.04e-10	yes	up	_	_	_
c40951_g1	18.72	3	-2.6	6.35e-12	4.12e-10	yes	down	K12118	CRY1	path:ko04712
c63293_g1	37.48	5.61	-2.72	6.39e-12	4.14e-10	yes	down	K01177	E3.2.1.2	path:ko00500;path:ko01100
c22392_g1	1.22	79.33	5.91	6.61e-12	4.27e-10	yes	up	K05909	E1.10.3.2	_
c69472_g1	1.32	14.68	3.38	6.68e-12	4.31e-10	yes	up	_	_	_
c65335_g1	10.93	0	-6.79	6.82e-12	4.39e-10	yes	down	_	_	_
c71992_g1	1.81	15614.8	12.99	6.87e-12	4.41e-10	yes	up	_	_	_
c61076_g2	2.38	24742.6	13.29	6.92e-12	4.44e-10	yes	up	_	_	_
c60109_g1	150.74	15.07	-3.31	6.97e-12	4.46e-10	yes	down	K01580	E4.1.1.15, gadB, gadA, GAD	path:ko00250;path:ko00410;path:ko00430;path:ko00650;path:ko01100;path:ko01110;path:ko04727;path:ko04940
c66816_g1	0.2	11.73	5.29	7.12e-12	4.55e-10	yes	up	_	_	_
c59753_g1	0.03	13.44	6.72	7.28e-12	4.64e-10	yes	up	_	_	_
c10143_g1	10.77	230.25	4.41	7.29e-12	4.65e-10	yes	up	_	_	_
c60430_g1	5.28	0	-5.75	7.38e-12	4.69e-10	yes	down	_	_	_
c80125_g1	2.92	58.15	4.27	7.39e-12	4.69e-10	yes	up	_	_	_
c56516_g1	40.14	300.01	2.9	7.54e-12	4.78e-10	yes	up	K09458	fabF	path:ko00061;path:ko00780;path:ko01100;path:ko01212
c55029_g1	2.32	0	-4.6	7.55e-12	4.78e-10	yes	down	_	_	_
c48061_g2	3.83	0	-5.3	7.61e-12	4.81e-10	yes	down	K07964	HPSE	path:ko00531;path:ko01100;path:ko05205
c94139_g1	56	7.36	-2.91	7.62e-12	4.81e-10	yes	down	K02723	psbY	path:ko00195;path:ko01100
c63777_g2	6.43	0.17	-4.62	7.67e-12	4.83e-10	yes	down	_	_	_
c67928_g1	10.79	97.5	3.16	7.73e-12	4.86e-10	yes	up	K00469	MIOX	path:ko00053;path:ko00562
c62471_g1	10.77	0.48	-4.22	8.15e-12	5.11e-10	yes	down	_	_	_
c101420_g1	0	3.89	5.32	8.54e-12	5.34e-10	yes	up	_	_	_
c70898_g6	2.84	177.51	5.92	8.55e-12	5.34e-10	yes	up	_	_	_
c17820_g1	19.57	0.48	-5.09	8.65e-12	5.39e-10	yes	down	K02639	petF	path:ko00195
c57289_g1	37.97	286.54	2.91	1e-11	6.24e-10	yes	up	K00208	fabI	path:ko00061;path:ko00780;path:ko01100;path:ko01212
c68538_g1	6.68	0.11	-4.99	1.02e-11	6.35e-10	yes	down	_	_	_
c19788_g1	2.07	79.51	5.2	1.03e-11	6.42e-10	yes	up	K01915	glnA, GLUL	path:ko00220;path:ko00250;path:ko00630;path:ko00910;path:ko01100;path:ko01120;path:ko01230;path:ko02020;path:ko04724;path:ko04727
c70658_g1	5.51	0.29	-3.86	1.04e-11	6.43e-10	yes	down	_	_	_
c55941_g1	4.03	0.11	-4.3	1.05e-11	6.47e-10	yes	down	_	_	_
c23656_g1	0.12	9.99	5.55	1.06e-11	6.54e-10	yes	up	_	_	_
c66808_g1	12.59	0.34	-4.84	1.08e-11	6.67e-10	yes	down	_	_	_
c61769_g1	9	0.29	-4.55	1.09e-11	6.72e-10	yes	down	_	_	_
c59906_g1	12.71	1.86	-2.71	1.09e-11	6.72e-10	yes	down	_	_	_
c70502_g1	34.85	6.29	-2.45	1.1e-11	6.72e-10	yes	down	K00029	E1.1.1.40, maeB	path:ko00620;path:ko00710;path:ko01100;path:ko01120;path:ko01200
c22068_g1	5.87	0.03	-5.54	1.1e-11	6.73e-10	yes	down	K16904	DCTPP1	path:ko00240;path:ko01100
c69414_g4	1.23	46.7	5.13	1.12e-11	6.82e-10	yes	up	K14497	PP2C	path:ko04075;path:ko04931
c54521_g1	201.79	5.71	-5.12	1.12e-11	6.86e-10	yes	down	K14332	psaO	path:ko00195
c19835_g1	101.7	2.08	-5.54	1.13e-11	6.91e-10	yes	down	K08917	LHCB6	path:ko00196;path:ko01100
c61743_g1	8.62	0.35	-4.28	1.17e-11	7.14e-10	yes	down	K13947	PIN	_
c66927_g6	5.29	0.12	-4.62	1.18e-11	7.14e-10	yes	down	_	_	_
c69527_g1	3.83	35.41	3.18	1.19e-11	7.24e-10	yes	up	_	_	_
c67944_g6	149.15	26.35	-2.5	1.23e-11	7.46e-10	yes	down	_	_	_
c58624_g1	2.6	0.01	-4.56	1.24e-11	7.49e-10	yes	down	_	_	_
c65796_g1	4.71	0.13	-4.36	1.29e-11	7.79e-10	yes	down	_	_	_
c66790_g1	1.34	44.72	4.96	1.29e-11	7.79e-10	yes	up	K10999	CESA	_
c71691_g1	0.15	4.57	4.23	1.31e-11	7.88e-10	yes	up	K13148	CPSF3L, INTS11	_
c71306_g3	0.02	4.63	5.28	1.35e-11	8.1e-10	yes	up	_	_	_
c30647_g1	59.08	4.3	-3.75	1.36e-11	8.16e-10	yes	down	_	_	_
c45166_g1	3.14	36.8	3.51	1.37e-11	8.21e-10	yes	up	_	_	_
c66619_g1	49.56	5.59	-3.12	1.38e-11	8.22e-10	yes	down	_	_	_
c71719_g4	56.46	3.46	-3.99	1.4e-11	8.37e-10	yes	down	_	_	_
c67421_g1	4.93	0.33	-3.54	1.48e-11	8.8e-10	yes	down	_	_	_
c48691_g1	4.38	0	-5.49	1.49e-11	8.87e-10	yes	down	_	_	_
c64533_g2	0.63	13.46	4.22	1.5e-11	8.91e-10	yes	up	K09843	E1.14.13.93	path:ko00906
c68532_g2	0.47	42.73	6.24	1.51e-11	8.94e-10	yes	up	_	_	_
c57193_g1	0.1	8.66	5.43	1.52e-11	8.98e-10	yes	up	_	_	_
c108654_g1	1.66	21.17	3.6	1.53e-11	9.02e-10	yes	up	K16282	RHA2	_
c67219_g1	11.73	1.76	-2.67	1.57e-11	9.27e-10	yes	down	_	_	_
c51814_g1	3.36	0.04	-4.62	1.64e-11	9.67e-10	yes	down	K09422	MYBP	_
c16519_g1	132.84	4.17	-4.96	1.74e-11	1.02e-09	yes	down	K02698	psaK	path:ko00195;path:ko01100
c40861_g1	34.66	2.39	-3.8	1.75e-11	1.03e-09	yes	down	K00430	E1.11.1.7	path:ko00940;path:ko01100;path:ko01110
c57708_g1	6.75	114.51	4.06	1.79e-11	1.05e-09	yes	up	K01176	E3.2.1.1, amyA, malS	path:ko00500;path:ko01100;path:ko04973
c71352_g1	0.08	3.66	4.35	1.87e-11	1.09e-09	yes	up	_	_	_
c103028_g1	7.79	0	-6.3	1.88e-11	1.1e-09	yes	down	_	_	_
c45957_g1	43.77	0	-8.78	1.94e-11	1.13e-09	yes	down	_	_	_
c65567_g1	2.03	0.03	-4.04	2e-11	1.16e-09	yes	down	K14638	SLC15A3_4, PHT	_
c65383_g7	20.08	0.26	-5.8	2.05e-11	1.19e-09	yes	down	_	_	_
c40075_g1	11.8	0.85	-3.65	2.06e-11	1.19e-09	yes	down	_	_	_
c61076_g1	3.94	47054.2	13.51	2.27e-11	1.32e-09	yes	up	_	_	_
c60240_g1	0.03	9.43	6.17	2.33e-11	1.35e-09	yes	up	_	_	_
c62064_g1	12.66	0.79	-3.83	2.35e-11	1.36e-09	yes	down	_	_	_
c68741_g1	3.16	0.02	-4.71	2.37e-11	1.37e-09	yes	down	_	_	_
c39048_g1	9.54	0.26	-4.74	2.42e-11	1.39e-09	yes	down	K00454	LOX2S	path:ko00591;path:ko00592;path:ko01100;path:ko01110
c24450_g1	0.02	6.18	5.66	2.51e-11	1.45e-09	yes	up	_	_	_
c55657_g1	2.9	66.12	4.46	2.52e-11	1.45e-09	yes	up	_	_	_
c68252_g1	3.88	106.53	4.74	2.54e-11	1.46e-09	yes	up	K00006	GPD1	path:ko00564;path:ko01110;path:ko04011
c66919_g2	1.75	18.71	3.35	2.58e-11	1.48e-09	yes	up	K01051	E3.1.1.11	path:ko00040;path:ko00500;path:ko01100
c55401_g1	26.46	0.79	-4.9	2.59e-11	1.48e-09	yes	down	_	_	_
c72271_g1	10.65	0.36	-4.54	2.6e-11	1.48e-09	yes	down	_	_	_
c50554_g1	0	2.62	4.77	2.7e-11	1.54e-09	yes	up	_	_	_
c70022_g1	22	0.47	-5.28	2.72e-11	1.55e-09	yes	down	K03403	chlH, bchH	path:ko00860;path:ko01100;path:ko01110
c32707_g1	9.85	0.97	-3.21	2.73e-11	1.55e-09	yes	down	_	_	_
c63783_g5	0.1	41.94	7.7	2.78e-11	1.57e-09	yes	up	_	_	_
c4875_g1	10.04	0.98	-3.23	2.84e-11	1.6e-09	yes	down	_	_	_
c67928_g2	1.42	28.91	4.25	2.87e-11	1.62e-09	yes	up	K00469	MIOX	path:ko00053;path:ko00562
c71916_g3	1.08	38.33	5.03	2.9e-11	1.64e-09	yes	up	_	_	_
c70927_g4	20.19	1.49	-3.67	2.94e-11	1.65e-09	yes	down	K15718	LOX1_5	path:ko00591
c51324_g2	0	10.53	6.73	2.96e-11	1.67e-09	yes	up	_	_	_
c26396_g1	12.88	299.78	4.53	3e-11	1.68e-09	yes	up	K15398	CYP86A4S	path:ko00073;path:ko01100
c454_g1	8.72	0.18	-5	3e-11	1.68e-09	yes	down	K14638	SLC15A3_4, PHT	_
c58072_g1	2.08	0.07	-3.7	3.02e-11	1.69e-09	yes	down	_	_	_
c57539_g1	0.16	61.71	7.87	3.04e-11	1.7e-09	yes	up	K01581	E4.1.1.17, ODC1, speC, speF	path:ko00330;path:ko00480;path:ko01100;path:ko01110;path:ko01130
c51951_g1	3.29	0	-5.08	3.07e-11	1.71e-09	yes	down	K01213	E3.2.1.67	path:ko00040;path:ko00500;path:ko01100
c69064_g2	43.45	2.97	-3.83	3.11e-11	1.74e-09	yes	down	_	_	_
c56644_g2	1.14	11167.5	13.13	3.25e-11	1.81e-09	yes	up	_	_	_
c52219_g1	0.27	13.37	5.2	3.28e-11	1.82e-09	yes	up	_	_	_
c69070_g3	299.08	27.51	-3.44	3.35e-11	1.86e-09	yes	down	_	_	_
c53205_g1	0.17	251.6	9.84	3.37e-11	1.87e-09	yes	up	_	_	_
c56382_g3	21.84	2.33	-3.18	3.44e-11	1.9e-09	yes	down	_	_	_
c71229_g3	3.4	0	-5.13	3.45e-11	1.9e-09	yes	down	K13356	FAR	path:ko00073;path:ko04146;path:ko04212
c41882_g1	0	2.64	4.77	3.49e-11	1.92e-09	yes	up	_	_	_
c65688_g1	7.71	0.04	-5.76	3.52e-11	1.94e-09	yes	down	_	_	_
c41107_g2	0.14	7.79	5.01	3.65e-11	2.01e-09	yes	up	K14491	ARR-B	path:ko04075
c37906_g1	9.72	0.21	-4.98	3.77e-11	2.07e-09	yes	down	K09873	TIP	_
c64716_g3	3.18	4192.2	10.32	3.78e-11	2.07e-09	yes	up	_	_	_
c70115_g1	0.04	5.11	5.27	3.79e-11	2.08e-09	yes	up	_	_	_
c70567_g1	20.25	164.79	3.02	3.89e-11	2.13e-09	yes	up	K00485	FMO	path:ko00982;path:ko01120
c59942_g3	1.91	0.05	-3.77	3.96e-11	2.16e-09	yes	down	_	_	_
c71886_g2	26.93	0.54	-5.4	4.06e-11	2.21e-09	yes	down	_	_	_
c64400_g1	20.94	0.62	-4.86	4.13e-11	2.25e-09	yes	down	_	_	_
c56960_g1	5.25	38.19	2.84	4.21e-11	2.29e-09	yes	up	K09838	ZEP, ABA1	path:ko00906;path:ko01100;path:ko01110
c53480_g1	4.38	0.04	-5.03	4.31e-11	2.34e-09	yes	down	K08906	petJ	path:ko00195
c28775_g1	0	75.85	9.57	4.48e-11	2.42e-09	yes	up	_	_	_
c59242_g2	9.58	0.08	-5.76	4.7e-11	2.54e-09	yes	down	_	_	_
c68989_g1	0.24	5.75	4.11	4.77e-11	2.58e-09	yes	up	_	_	_
c32211_g2	4.69	0.09	-4.64	4.83e-11	2.61e-09	yes	down	K14484	IAA	path:ko04075
c67576_g1	1.63	0.07	-3.32	4.95e-11	2.66e-09	yes	down	_	_	_
c49974_g1	9.22	0.11	-5.5	5.06e-11	2.72e-09	yes	down	_	_	_
c72885_g1	4.12	0.04	-4.91	5.08e-11	2.73e-09	yes	down	_	_	_
c69719_g1	6.89	0.48	-3.58	5.12e-11	2.74e-09	yes	down	_	_	_
c47866_g1	78.66	12.31	-2.67	5.26e-11	2.81e-09	yes	down	_	_	_
c16376_g1	12.06	0.92	-3.57	5.28e-11	2.82e-09	yes	down	_	_	_
c47252_g1	5	0.12	-4.56	5.64e-11	3.01e-09	yes	down	_	_	_
c68562_g1	9.61	0.45	-4.15	5.66e-11	3.02e-09	yes	down	_	_	_
c40403_g1	0.05	69.98	8.89	5.8e-11	3.09e-09	yes	up	K05748	WASF2	path:ko04520;path:ko04666;path:ko04810;path:ko05100;path:ko05131;path:ko05132;path:ko05231
c61322_g2	22.97	165.63	2.84	5.94e-11	3.16e-09	yes	up	_	_	_
c66595_g1	0.02	14.17	6.84	5.96e-11	3.16e-09	yes	up	_	_	_
c66451_g1	1.5	34.98	4.45	5.96e-11	3.16e-09	yes	up	_	_	_
c59587_g1	5.63	0.19	-4.31	6.03e-11	3.19e-09	yes	down	K08235	E2.4.1.207	_
c56165_g1	20.35	0.85	-4.43	6.23e-11	3.29e-09	yes	down	K08901	psbQ	path:ko00195;path:ko01100
c65950_g2	0.03	21.17	7.39	6.57e-11	3.47e-09	yes	up	K10406	KIFC2_3	_
c32220_g1	1.97	0	-4.37	6.88e-11	3.63e-09	yes	down	_	_	_
c67424_g3	0.02	4.34	5.26	6.91e-11	3.64e-09	yes	up	K11838	USP7, UBP15	path:ko04068;path:ko05168;path:ko05169;path:ko05203
c29735_g2	3.45	0.05	-4.58	6.95e-11	3.65e-09	yes	down	_	_	_
c51599_g1	10.52	0.99	-3.28	7.22e-11	3.79e-09	yes	down	_	_	_
c32957_g1	16.07	0.17	-5.92	7.64e-11	4e-09	yes	down	_	_	_
c42703_g1	58.82	1128.55	4.26	7.92e-11	4.14e-09	yes	up	_	_	_
c68090_g2	26.48	2.78	-3.21	7.93e-11	4.14e-09	yes	down	_	_	_
c48554_g2	0	6.23	5.98	7.95e-11	4.15e-09	yes	up	K07192	FLOT	path:ko04910
c69215_g1	3.93	0.07	-4.57	8.36e-11	4.35e-09	yes	down	_	_	_
c67931_g1	0.04	69.46	8.98	8.82e-11	4.59e-09	yes	up	_	_	_
c62610_g1	0	11.13	6.81	8.92e-11	4.63e-09	yes	up	K14497	PP2C	path:ko04075;path:ko04931
c64324_g1	0.37	10.59	4.49	8.99e-11	4.66e-09	yes	up	_	_	_
c39383_g1	0.5	28.25	5.55	9.31e-11	4.82e-09	yes	up	_	_	_
c66278_g1	8.05	0.31	-4.3	9.45e-11	4.89e-09	yes	down	_	_	_
c18356_g1	0.04	37.47	8.03	9.51e-11	4.91e-09	yes	up	_	_	_
c61509_g1	2.67	0.04	-4.32	1.04e-10	5.39e-09	yes	down	_	_	_
c61715_g1	21.52	0.46	-5.28	1.09e-10	5.62e-09	yes	down	K12153	CYP79A2	path:ko00460;path:ko00966;path:ko01110;path:ko01210
c66543_g2	4.37	0	-5.48	1.12e-10	5.77e-09	yes	down	_	_	_
c51301_g2	3.59	0.07	-4.45	1.15e-10	5.93e-09	yes	down	_	_	_
c69435_g1	22.53	3.27	-2.75	1.17e-10	6e-09	yes	down	K13171	SRRM1, SRM160	path:ko03013;path:ko03015
c59393_g1	239.06	4.63	-5.66	1.23e-10	6.3e-09	yes	down	K08915	LHCB4	path:ko00196;path:ko01100
c60595_g1	0.51	167.75	8.1	1.23e-10	6.31e-09	yes	up	_	_	_
c18513_g1	11.64	0.69	-3.89	1.24e-10	6.35e-09	yes	down	_	_	_
c66938_g1	4.63	31242.7	12.69	1.27e-10	6.48e-09	yes	up	_	_	_
c67413_g1	0.05	308.63	11.01	1.29e-10	6.55e-09	yes	up	_	_	_
c57055_g3	45.87	3.37	-3.73	1.29e-10	6.56e-09	yes	down	K15634	gpmB	path:ko00010;path:ko00260;path:ko00680;path:ko01100;path:ko01110;path:ko01120;path:ko01130;path:ko01200;path:ko01230
c54354_g1	1.46	0	-3.96	1.3e-10	6.62e-09	yes	down	_	_	_
c55322_g1	8.22	0.49	-3.82	1.31e-10	6.65e-09	yes	down	_	_	_
c37294_g1	33.09	5.52	-2.56	1.33e-10	6.76e-09	yes	down	K05933	E1.14.17.4	path:ko00270;path:ko01100;path:ko01110
c24418_g1	10.16	0.06	-5.97	1.34e-10	6.8e-09	yes	down	_	_	_
c72050_g1	7.16	0.1	-5.17	1.35e-10	6.81e-09	yes	down	_	_	_
c53824_g1	1.51	0	-4.01	1.35e-10	6.81e-09	yes	down	_	_	_
c62737_g1	94.92	4.32	-4.43	1.36e-10	6.88e-09	yes	down	K08901	psbQ	path:ko00195;path:ko01100
c73488_g1	0.01	1.74	4.08	1.42e-10	7.15e-09	yes	up	_	_	_
c71910_g2	0	11.02	6.8	1.44e-10	7.23e-09	yes	up	_	_	_
c65404_g4	2.85	9812.27	11.7	1.45e-10	7.25e-09	yes	up	_	_	_
c54966_g1	3.05	0.13	-3.8	1.46e-10	7.31e-09	yes	down	_	_	_
c53453_g1	1.8	81.07	5.41	1.47e-10	7.32e-09	yes	up	_	_	_
c26320_g1	33.99	231.16	2.76	1.47e-10	7.32e-09	yes	up	K00588	E2.1.1.104	path:ko00360;path:ko00940;path:ko00941;path:ko00945;path:ko01100;path:ko01110
c62868_g4	11.02	0.65	-3.89	1.47e-10	7.32e-09	yes	down	K00799	GST, gst	path:ko00480;path:ko00980;path:ko00982;path:ko05204
c61247_g1	5.76	177.17	4.92	1.49e-10	7.41e-09	yes	up	K00318	PRODH	path:ko00330;path:ko01100;path:ko01110;path:ko01130
c56047_g2	39.65	6.31	-2.63	1.49e-10	7.43e-09	yes	down	_	_	_
c57822_g1	1.57	0	-4.06	1.5e-10	7.46e-09	yes	down	_	_	_
c66767_g2	18.29	139.19	2.92	1.52e-10	7.55e-09	yes	up	K00382	DLD, lpd, pdhD	path:ko00010;path:ko00020;path:ko00260;path:ko00280;path:ko00620;path:ko00630;path:ko00640;path:ko01100;path:ko01110;path:ko01120;path:ko01130;path:ko01200
c67528_g2	3.15	0	-5.02	1.57e-10	7.79e-09	yes	down	K18195	RGL4, rhiE	_
c71916_g4	8.09	0.24	-4.6	1.6e-10	7.92e-09	yes	down	_	_	_
c25427_g1	22.81	1.07	-4.29	1.65e-10	8.16e-09	yes	down	_	_	_
c58383_g1	0	21.23	7.74	1.66e-10	8.16e-09	yes	up	_	_	_
c62060_g1	2.18	22.82	3.33	1.66e-10	8.16e-09	yes	up	_	_	_
c48156_g1	9.26	1.51	-2.54	1.71e-10	8.39e-09	yes	down	_	_	_
c46848_g1	0.23	6.4	4.31	1.71e-10	8.39e-09	yes	up	K14638	SLC15A3_4, PHT	_
c35143_g1	1.33	0.01	-3.76	1.72e-10	8.45e-09	yes	down	_	_	_
c50068_g1	30.56	2.12	-3.79	1.77e-10	8.66e-09	yes	down	_	_	_
c43010_g1	0.03	4.93	5.31	1.78e-10	8.73e-09	yes	up	_	_	_
c71952_g1	34.07	268.21	2.97	1.84e-10	8.98e-09	yes	up	K00162	PDHB, pdhB	path:ko00010;path:ko00020;path:ko00620;path:ko01100;path:ko01110;path:ko01120;path:ko01130;path:ko01200;path:ko04066;path:ko04922;path:ko05230
c67939_g1	1.84	0	-4.28	1.84e-10	8.98e-09	yes	down	K01051	E3.1.1.11	path:ko00040;path:ko00500;path:ko01100
c39457_g1	3.49	0	-5.17	1.88e-10	9.14e-09	yes	down	_	_	_
c58496_g3	0.01	3.37	4.98	1.89e-10	9.21e-09	yes	up	_	_	_
c65251_g3	48.71	9.83	-2.3	1.9e-10	9.22e-09	yes	down	_	_	_
c47706_g1	0.24	179.18	9.05	1.93e-10	9.38e-09	yes	up	_	_	_
c69450_g1	4.57	69.74	3.9	1.97e-10	9.53e-09	yes	up	_	_	_
c64936_g1	9.07	0.33	-4.42	2.01e-10	9.74e-09	yes	down	_	_	_
c71083_g2	11.33	137.65	3.59	2.05e-10	9.9e-09	yes	up	_	_	_
c67949_g1	14.33	2.33	-2.57	2.05e-10	9.9e-09	yes	down	K14485	TIR1	path:ko04075
c8891_g1	0.01	1.37	3.76	2.13e-10	1.03e-08	yes	up	_	_	_
c69117_g3	1.53	5015.89	11.59	2.22e-10	1.07e-08	yes	up	_	_	_
c64911_g1	12.98	1.35	-3.17	2.24e-10	1.08e-08	yes	down	_	_	_
c47314_g1	3.99	57.17	3.81	2.24e-10	1.08e-08	yes	up	K13379	RGP, UTM	path:ko00520
c64052_g1	0.29	7.62	4.31	2.25e-10	1.08e-08	yes	up	_	_	_
c65408_g1	5.95	0.43	-3.5	2.26e-10	1.08e-08	yes	down	_	_	_
c69588_g1	0.9	0.01	-3.19	2.31e-10	1.1e-08	yes	down	_	_	_
c69426_g1	0	1.99	4.33	2.32e-10	1.11e-08	yes	up	_	_	_
c68790_g2	12.05	0.59	-4.13	2.39e-10	1.14e-08	yes	down	_	_	_
c65846_g1	50.89	8.6	-2.55	2.45e-10	1.17e-08	yes	down	K02113	ATPF1D, atpH	path:ko00190;path:ko00195;path:ko01100
c108635_g1	92.1	1.99	-5.47	2.49e-10	1.19e-08	yes	down	K03542	psbS	path:ko00195;path:ko01100
c34574_g2	14.91	0	-7.23	2.52e-10	1.2e-08	yes	down	_	_	_
c69874_g1	10.02	0.49	-4.11	2.64e-10	1.25e-08	yes	down	_	_	_
c50053_g1	6.41	0.15	-4.68	2.66e-10	1.26e-08	yes	down	_	_	_
c9981_g1	3.17	0.3	-3.02	2.67e-10	1.26e-08	yes	down	_	_	_
c67490_g1	0.01	25.84	7.94	2.68e-10	1.27e-08	yes	up	K05658	ABCB1	path:ko02010;path:ko04976;path:ko05206
c64793_g2	0.11	14.03	6.07	2.71e-10	1.28e-08	yes	up	K14638	SLC15A3_4, PHT	_
c72430_g1	150.35	13.32	-3.49	2.71e-10	1.28e-08	yes	down	_	_	_
c62239_g1	29.58	0.57	-5.46	2.71e-10	1.28e-08	yes	down	K02721	psbW	path:ko00195;path:ko01100
c107936_g1	17.64	0	-7.47	2.72e-10	1.28e-08	yes	down	_	_	_
c64992_g1	5.54	0.2	-4.21	2.82e-10	1.33e-08	yes	down	_	_	_
c65789_g1	13.77	2	-2.73	2.83e-10	1.33e-08	yes	down	K03110	ftsY	path:ko03060;path:ko03070
c71655_g1	0.63	19.13	4.72	2.95e-10	1.38e-08	yes	up	_	_	_
c54194_g1	8.13	0.28	-4.45	3.02e-10	1.41e-08	yes	down	_	_	_
c61785_g3	0.03	6.04	5.55	3.11e-10	1.46e-08	yes	up	_	_	_
c69214_g1	4.62	0.18	-4.08	3.13e-10	1.46e-08	yes	down	_	_	_
c58131_g1	8.33	0.79	-3.24	3.16e-10	1.47e-08	yes	down	K01187	malZ	path:ko00052;path:ko00500;path:ko01100
c48527_g1	0.15	18.05	6.2	3.17e-10	1.48e-08	yes	up	_	_	_
c94104_g1	1.97	23.26	3.5	3.22e-10	1.5e-08	yes	up	_	_	_
c67288_g1	5.14	112.79	4.43	3.4e-10	1.58e-08	yes	up	K01373	CTSF	path:ko04142;path:ko04210
c68863_g1	0.01	44.89	8.62	3.41e-10	1.58e-08	yes	up	_	_	_
c59405_g1	6.57	0.35	-3.89	3.44e-10	1.6e-08	yes	down	_	_	_
c36581_g1	1.27	18.49	3.76	3.47e-10	1.6e-08	yes	up	_	_	_
c45532_g1	3.97	224.53	5.79	3.5e-10	1.62e-08	yes	up	K08770	UBC	path:ko03320
c23812_g1	4.28	0.19	-3.89	3.67e-10	1.7e-08	yes	down	_	_	_
c66473_g2	1.77	0	-4.22	3.81e-10	1.76e-08	yes	down	_	_	_
c69617_g1	7.93	0.26	-4.48	3.82e-10	1.76e-08	yes	down	_	_	_
c59315_g2	3	0.01	-4.8	3.87e-10	1.78e-08	yes	down	K01213	E3.2.1.67	path:ko00040;path:ko00500;path:ko01100
c64089_g1	0.34	8.01	4.21	3.91e-10	1.8e-08	yes	up	K14685	SLC40A1, FPN1	path:ko04978
c8648_g1	0.07	8.06	5.59	3.96e-10	1.82e-08	yes	up	_	_	_
c63135_g1	13.72	1.7	-2.94	3.97e-10	1.82e-08	yes	down	_	_	_
c58817_g1	2.66	39.08	3.83	4e-10	1.83e-08	yes	up	K13680	CSLA	_
c64968_g1	10.7	66.76	2.63	4.01e-10	1.83e-08	yes	up	K05349	bglX	path:ko00460;path:ko00500;path:ko00940;path:ko01100;path:ko01110
c69122_g3	0.16	11.05	5.43	4.02e-10	1.84e-08	yes	up	_	_	_
c50822_g1	20.01	0.42	-5.28	4.1e-10	1.87e-08	yes	down	_	_	_
c55527_g1	2.26	15408.5	12.67	4.11e-10	1.87e-08	yes	up	_	_	_
c25666_g1	8.37	0.34	-4.27	4.26e-10	1.94e-08	yes	down	_	_	_
c50129_g1	4.52	48.73	3.4	4.27e-10	1.94e-08	yes	up	_	_	_
c52425_g2	0.2	17.35	5.85	4.27e-10	1.94e-08	yes	up	_	_	_
c28781_g1	101.57	3.47	-4.83	4.42e-10	2e-08	yes	down	K03126	TAF12	path:ko03022
c37036_g2	69.87	7.56	-3.19	4.45e-10	2.01e-08	yes	down	K09840	NCED	path:ko00906;path:ko01100;path:ko01110
c49653_g1	33.77	3.41	-3.27	4.56e-10	2.06e-08	yes	down	_	_	_
c66381_g1	9.8	0.34	-4.5	4.73e-10	2.14e-08	yes	down	_	_	_
c57998_g1	5.86	0.13	-4.69	4.87e-10	2.2e-08	yes	down	K01674	cah	path:ko00910
c70533_g6	2.95	0.02	-4.67	4.97e-10	2.24e-08	yes	down	_	_	_
c66621_g1	13.43	0.82	-3.88	4.97e-10	2.24e-08	yes	down	_	_	_
c66880_g1	24.34	1.62	-3.83	5.03e-10	2.26e-08	yes	down	K13691	SGT1	_
c62176_g1	167.65	2.81	-5.85	5.04e-10	2.26e-08	yes	down	K01183	E3.2.1.14	path:ko00520;path:ko01100
c38519_g1	0.01	1.5	3.84	5.1e-10	2.29e-08	yes	up	_	_	_
c5493_g1	128.34	3	-5.37	5.22e-10	2.34e-08	yes	down	_	_	_
c61515_g1	12.46	0.53	-4.31	5.23e-10	2.34e-08	yes	down	_	_	_
c52276_g2	16.86	1.5	-3.4	5.23e-10	2.34e-08	yes	down	K00924	E2.7.1.-	_
c58330_g1	14.31	0.39	-4.89	5.34e-10	2.38e-08	yes	down	_	_	_
c7529_g1	2.52	245.09	6.55	5.42e-10	2.41e-08	yes	up	_	_	_
c67843_g1	7.78	0.23	-4.59	5.65e-10	2.51e-08	yes	down	K03327	TC.MATE, SLC47A, norM, mdtK, dinF	_
c48061_g1	4.22	0.03	-5.07	5.7e-10	2.53e-08	yes	down	K07964	HPSE	path:ko00531;path:ko01100;path:ko05205
c22305_g1	8.77	0.22	-4.8	5.75e-10	2.55e-08	yes	down	_	_	_
c67699_g2	1.64	12.87	2.9	5.8e-10	2.57e-08	yes	up	_	_	_
c47894_g1	18.51	1.6	-3.45	5.89e-10	2.61e-08	yes	down	_	_	_
c79708_g1	6.25	110.01	4.11	5.9e-10	2.61e-08	yes	up	_	_	_
c109478_g1	2.59	0	-4.75	5.96e-10	2.63e-08	yes	down	_	_	_
c61756_g2	3.58	0.11	-4.11	5.96e-10	2.63e-08	yes	down	_	_	_
c16064_g1	1.8	114.42	5.91	6.09e-10	2.68e-08	yes	up	_	_	_
c70783_g1	623.07	125.17	-2.31	6.11e-10	2.69e-08	yes	down	K01177	E3.2.1.2	path:ko00500;path:ko01100
c89574_g1	0	2.76	4.84	6.16e-10	2.71e-08	yes	up	_	_	_
c71610_g3	0.07	7.28	5.47	6.23e-10	2.74e-08	yes	up	_	_	_
c69048_g2	272.08	45.22	-2.59	6.35e-10	2.78e-08	yes	down	K09873	TIP	_
c23305_g1	0.91	731.33	9.5	6.36e-10	2.78e-08	yes	up	_	_	_
c70862_g3	58.31	12.16	-2.25	6.36e-10	2.78e-08	yes	down	_	_	_
c65027_g1	0.32	15.14	5.18	6.43e-10	2.81e-08	yes	up	K19037	ATL23	_
c50328_g1	0.04	6.74	5.64	6.45e-10	2.81e-08	yes	up	_	_	_
c56644_g1	0	1453.55	13.83	6.59e-10	2.87e-08	yes	up	_	_	_
c71001_g1	12.23	0.69	-3.96	6.62e-10	2.88e-08	yes	down	_	_	_
c69117_g4	1.04	2315.88	10.99	6.66e-10	2.9e-08	yes	up	_	_	_
c5587_g1	8.86	0.62	-3.63	6.68e-10	2.9e-08	yes	down	_	_	_
c36256_g1	5.21	0.01	-5.54	6.75e-10	2.93e-08	yes	down	K14379	ACP5	path:ko04142;path:ko04380;path:ko05323
c48520_g1	33.08	6.12	-2.41	6.75e-10	2.93e-08	yes	down	K00432	E1.11.1.9	path:ko00480;path:ko00590;path:ko04918
c68300_g1	15.83	104.51	2.72	6.81e-10	2.95e-08	yes	up	K00645	fabD	path:ko00061;path:ko01100;path:ko01212
c67180_g2	0.8	6.7	2.91	6.82e-10	2.95e-08	yes	up	K05658	ABCB1	path:ko02010;path:ko04976;path:ko05206
c54989_g1	128.11	17.96	-2.83	6.84e-10	2.95e-08	yes	down	_	_	_
c49377_g1	19.05	2.18	-3.07	6.88e-10	2.97e-08	yes	down	_	_	_
c59802_g1	25.46	0.66	-5.07	6.88e-10	2.97e-08	yes	down	_	_	_
c79437_g1	138.45	26.43	-2.38	6.92e-10	2.98e-08	yes	down	K13262	7-IOMT	path:ko00943
c27924_g1	5.61	0.24	-4.09	7.06e-10	3.04e-08	yes	down	_	_	_
c69873_g1	155.74	20.68	-2.91	7.1e-10	3.05e-08	yes	down	_	_	_
c54251_g1	24.69	4.5	-2.43	7.38e-10	3.16e-08	yes	down	K03327	TC.MATE, SLC47A, norM, mdtK, dinF	_
c36853_g2	7.73	0.38	-4.03	7.53e-10	3.23e-08	yes	down	_	_	_
c48146_g1	95.78	13.39	-2.83	7.59e-10	3.25e-08	yes	down	_	_	_
c64622_g2	30.02	3.1	-3.24	7.64e-10	3.27e-08	yes	down	_	_	_
c69122_g7	0	11.82	6.9	7.7e-10	3.29e-08	yes	up	_	_	_
c59749_g1	28.88	2.59	-3.43	7.74e-10	3.3e-08	yes	down	_	_	_
c52012_g1	1.2	0	-3.7	7.9e-10	3.36e-08	yes	down	K06617	E2.4.1.82	path:ko00052
c69756_g1	40.17	8.83	-2.17	7.99e-10	3.4e-08	yes	down	_	_	_
c69641_g1	35.54	7.33	-2.26	8.31e-10	3.53e-08	yes	down	_	_	_
c55656_g5	66.62	2.41	-4.73	8.36e-10	3.55e-08	yes	down	K02437	gcvH, GCSH	path:ko00260;path:ko00630;path:ko01100;path:ko01110;path:ko01130
c60661_g1	2.42	0.05	-4.05	8.54e-10	3.62e-08	yes	down	K18848	IAMT1	_
c61384_g1	2.67	0	-4.79	8.6e-10	3.64e-08	yes	down	_	_	_
c68992_g2	0.46	141.22	7.99	8.68e-10	3.67e-08	yes	up	_	_	_
c63299_g1	0.76	22.34	4.7	8.82e-10	3.72e-08	yes	up	K11982	RNF115_126	_
c54849_g2	5.83	41.49	2.81	8.94e-10	3.77e-08	yes	up	K05758	ARPC2	path:ko04144;path:ko04666;path:ko04810;path:ko05100;path:ko05130;path:ko05131;path:ko05132
c70229_g1	0.49	7.02	3.59	8.96e-10	3.78e-08	yes	up	_	_	_
c71257_g10	0.95	67.25	6	9.18e-10	3.86e-08	yes	up	_	_	_
c72116_g1	7.65	0.33	-4.16	9.4e-10	3.95e-08	yes	down	_	_	_
c64769_g1	9.77	1.28	-2.84	9.48e-10	3.98e-08	yes	down	_	_	_
c40370_g1	34.45	2.42	-3.78	9.68e-10	4.06e-08	yes	down	K18980	EO	_
c36768_g1	118.05	3.03	-5.24	9.77e-10	4.09e-08	yes	down	K01623	ALDO	path:ko00010;path:ko00030;path:ko00051;path:ko00680;path:ko00710;path:ko01100;path:ko01110;path:ko01120;path:ko01130;path:ko01200;path:ko01230
c65140_g2	0.56	47.79	6.18	9.93e-10	4.16e-08	yes	up	_	_	_
c8843_g1	1.28	76.28	5.79	1.05e-09	4.38e-08	yes	up	K10949	KDELR	path:ko05110
c61115_g2	19.15	3.43	-2.45	1.08e-09	4.5e-08	yes	down	_	_	_
c54430_g2	0.03	1.86	3.89	1.08e-09	4.5e-08	yes	up	_	_	_
c55453_g1	5.95	36.45	2.6	1.08e-09	4.51e-08	yes	up	_	_	_
c28764_g1	12.65	1.7	-2.82	1.1e-09	4.58e-08	yes	down	_	_	_
c64755_g2	6.95	0.26	-4.3	1.11e-09	4.59e-08	yes	down	_	_	_
c23645_g1	9.93	0.36	-4.45	1.12e-09	4.66e-08	yes	down	_	_	_
c17971_g1	122.5	2.92	-5.34	1.13e-09	4.7e-08	yes	down	K05298	GAPA	path:ko00710;path:ko01100;path:ko01120;path:ko01200
c52066_g2	4.79	0.16	-4.21	1.14e-09	4.72e-08	yes	down	_	_	_
c59588_g1	3.94	0	-5.34	1.14e-09	4.72e-08	yes	down	_	_	_
c57674_g1	9.1	0.17	-5.08	1.15e-09	4.74e-08	yes	down	_	_	_
c66675_g1	5.8	0.15	-4.53	1.17e-09	4.83e-08	yes	down	_	_	_
c55699_g2	18.86	2.81	-2.7	1.17e-09	4.83e-08	yes	down	_	_	_
c44838_g1	15	128.44	3.09	1.17e-09	4.83e-08	yes	up	K06689	UBE2D_E, UBC4, UBC5	path:ko04120;path:ko04141
c88353_g1	0	14.6	7.2	1.18e-09	4.84e-08	yes	up	_	_	_
c70224_g1	9.12	1.84	-2.25	1.18e-09	4.84e-08	yes	down	_	_	_
c98143_g1	0	3.14	5.02	1.18e-09	4.84e-08	yes	up	_	_	_
c112647_g1	0.68	31.84	5.36	1.19e-09	4.89e-08	yes	up	_	_	_
c101647_g1	1.71	12.59	2.81	1.21e-09	4.97e-08	yes	up	_	_	_
c101448_g1	17.43	0.35	-5.29	1.23e-09	5.02e-08	yes	down	_	_	_
c56118_g2	0.44	36.77	6.1	1.23e-09	5.02e-08	yes	up	_	_	_
c65390_g2	0.36	2301.9	12.28	1.23e-09	5.02e-08	yes	up	_	_	_
c2402_g1	4.55	0.14	-4.27	1.23e-09	5.02e-08	yes	down	_	_	_
c66217_g3	8.45	0.28	-4.48	1.27e-09	5.17e-08	yes	down	K01535	E3.6.3.6	path:ko00190
c102391_g1	16.23	1.61	-3.26	1.27e-09	5.17e-08	yes	down	_	_	_
c69793_g1	64.39	406.72	2.66	1.29e-09	5.22e-08	yes	up	K14509	ETR, ERS	path:ko04075
c108697_g1	12.47	77.08	2.62	1.29e-09	5.22e-08	yes	up	_	_	_
c68949_g10	0	6.81	6.11	1.29e-09	5.23e-08	yes	up	_	_	_
c30867_g2	10.05	0.34	-4.53	1.3e-09	5.28e-08	yes	down	_	_	_
c70490_g2	0.81	12.97	3.85	1.3e-09	5.28e-08	yes	up	_	_	_
c35220_g2	4.06	0.05	-4.8	1.31e-09	5.3e-08	yes	down	_	_	_
c58616_g4	8.06	0.31	-4.33	1.32e-09	5.31e-08	yes	down	_	_	_
c30703_g2	40.14	4.32	-3.19	1.33e-09	5.35e-08	yes	down	_	_	_
c56167_g1	0.08	2.6	3.94	1.33e-09	5.37e-08	yes	up	_	_	_
c8428_g1	5.13	0.45	-3.24	1.36e-09	5.46e-08	yes	down	K15402	CYP86B1	path:ko00073
c58322_g1	6.56	0.03	-5.69	1.38e-09	5.56e-08	yes	down	K01051	E3.1.1.11	path:ko00040;path:ko00500;path:ko01100
c38911_g1	6.49	0.13	-4.86	1.39e-09	5.57e-08	yes	down	_	_	_
c60216_g1	14.89	1.18	-3.55	1.41e-09	5.66e-08	yes	down	_	_	_
c69106_g2	5.2	0.09	-4.8	1.42e-09	5.68e-08	yes	down	_	_	_
c52276_g1	14.59	1.2	-3.5	1.42e-09	5.68e-08	yes	down	K00924	E2.7.1.-	_
c101544_g1	6.59	0.45	-3.61	1.43e-09	5.73e-08	yes	down	_	_	_
c62300_g1	15.31	2.19	-2.75	1.44e-09	5.75e-08	yes	down	K09338	HD-ZIP	_
c68548_g1	6.8	34.23	2.32	1.45e-09	5.77e-08	yes	up	K14829	IPI3	_
c70391_g1	23.83	5.07	-2.21	1.48e-09	5.88e-08	yes	down	_	_	_
c66310_g1	18.34	0.86	-4.26	1.49e-09	5.94e-08	yes	down	_	_	_
c67881_g6	0.88	15.89	4.02	1.5e-09	5.96e-08	yes	up	K19355	MAN	path:ko00051
c64452_g2	3.02	0.1	-3.93	1.5e-09	5.96e-08	yes	down	_	_	_
c64716_g5	1.52	3959.85	11.25	1.52e-09	6.04e-08	yes	up	_	_	_
c79449_g1	3.5	0	-5.17	1.56e-09	6.18e-08	yes	down	_	_	_
c56766_g2	6.73	0.37	-3.87	1.57e-09	6.23e-08	yes	down	_	_	_
c71510_g1	2.37	0.03	-4.25	1.58e-09	6.24e-08	yes	down	K18108	E4.2.3.111	path:ko00902;path:ko01100;path:ko01110
c65345_g4	0.01	1.29	3.7	1.58e-09	6.24e-08	yes	up	_	_	_
c62481_g1	0.59	62.62	6.5	1.59e-09	6.29e-08	yes	up	_	_	_
c67038_g3	20.22	1.89	-3.35	1.61e-09	6.34e-08	yes	down	_	_	_
c57062_g1	0.41	13.85	4.78	1.63e-09	6.4e-08	yes	up	K13272	AOMT, CROMT2	path:ko00944
c8266_g1	4.89	0.18	-4.17	1.64e-09	6.45e-08	yes	down	_	_	_
c64088_g2	0.1	274.64	10.44	1.65e-09	6.49e-08	yes	up	_	_	_
c68179_g1	14.4	1.17	-3.51	1.66e-09	6.52e-08	yes	down	K07437	CYP26A	path:ko00830;path:ko01100
c66903_g1	0.04	92.92	9.33	1.69e-09	6.63e-08	yes	up	_	_	_
c48463_g1	8.83	0.47	-3.96	1.7e-09	6.64e-08	yes	down	_	_	_
c62088_g3	10.26	0	-6.69	1.7e-09	6.64e-08	yes	down	K14709	SLC39A1_2_3, ZIP1_2_3	_
c22118_g1	48.56	2.79	-4.07	1.72e-09	6.72e-08	yes	down	K08901	psbQ	path:ko00195;path:ko01100
c59080_g1	9.57	0.38	-4.32	1.74e-09	6.78e-08	yes	down	_	_	_
c70305_g5	10.11	0.42	-4.28	1.74e-09	6.79e-08	yes	down	K06129	LYPLA3	path:ko00564;path:ko04142
c1518_g1	66.25	10.07	-2.71	1.75e-09	6.82e-08	yes	down	_	_	_
c61715_g2	18.12	0.46	-5.01	1.79e-09	6.95e-08	yes	down	K12153	CYP79A2	path:ko00460;path:ko00966;path:ko01110;path:ko01210
c67703_g2	48.55	347.88	2.84	1.79e-09	6.98e-08	yes	up	_	_	_
c67845_g1	4.22	64.37	3.9	1.8e-09	7.01e-08	yes	up	K16732	PRC1	_
c62458_g1	18.05	1.5	-3.5	1.86e-09	7.23e-08	yes	down	_	_	_
c67100_g1	12.13	0.7	-3.93	1.9e-09	7.35e-08	yes	down	K03428	E2.1.1.11, chlM, bchM	path:ko00860;path:ko01100;path:ko01110
c50407_g1	12.81	0.63	-4.14	1.91e-09	7.41e-08	yes	down	_	_	_
c54689_g1	6.15	0.18	-4.49	1.94e-09	7.49e-08	yes	down	_	_	_
c63785_g2	37.49	2.08	-4.11	1.94e-09	7.49e-08	yes	down	K05933	E1.14.17.4	path:ko00270;path:ko01100;path:ko01110
c62690_g1	1.93	59.57	4.87	1.98e-09	7.64e-08	yes	up	K14497	PP2C	path:ko04075;path:ko04931
c58888_g2	13.89	2.13	-2.65	1.99e-09	7.68e-08	yes	down	_	_	_
c52653_g1	29.68	4.74	-2.62	2e-09	7.69e-08	yes	down	_	_	_
c58639_g1	3.41	0.07	-4.4	2.02e-09	7.78e-08	yes	down	_	_	_
c44532_g1	56.55	2.19	-4.63	2.03e-09	7.81e-08	yes	down	_	_	_
c53537_g1	18.27	0.5	-4.94	2.04e-09	7.83e-08	yes	down	_	_	_
c55108_g1	7.89	0.52	-3.69	2.06e-09	7.9e-08	yes	down	_	_	_
c65390_g1	0.28	2092.96	12.44	2.06e-09	7.91e-08	yes	up	_	_	_
c12951_g1	33.06	193.53	2.55	2.09e-09	8.01e-08	yes	up	K00873	PK, pyk	path:ko00010;path:ko00230;path:ko00620;path:ko01100;path:ko01110;path:ko01120;path:ko01130;path:ko01200;path:ko01230;path:ko04922;path:ko04930;path:ko05203;path:ko05230
c63749_g8	0	2.82	4.87	2.12e-09	8.1e-08	yes	up	_	_	_
c70161_g2	0	2.89	4.9	2.13e-09	8.15e-08	yes	up	_	_	_
c23952_g1	5.8	0.16	-4.52	2.17e-09	8.26e-08	yes	down	_	_	_
c65860_g1	7.96	0.83	-3.11	2.2e-09	8.39e-08	yes	down	K01723	AOS	path:ko00592;path:ko01100;path:ko01110
c55322_g3	23.31	0.92	-4.51	2.21e-09	8.42e-08	yes	down	_	_	_
c66386_g1	3.49	361.6	6.66	2.25e-09	8.54e-08	yes	up	_	_	_
c64246_g1	9.27	54.89	2.55	2.27e-09	8.63e-08	yes	up	K07964	HPSE	path:ko00531;path:ko01100;path:ko05205
c26724_g1	13.39	1.63	-2.96	2.28e-09	8.63e-08	yes	down	_	_	_
c50932_g1	1745.01	52.68	-5.05	2.28e-09	8.65e-08	yes	down	K08912	LHCB1	path:ko00196;path:ko01100
c55159_g1	0.65	8.5	3.52	2.37e-09	8.97e-08	yes	up	_	_	_
c65429_g2	156.75	27.47	-2.51	2.43e-09	9.19e-08	yes	down	_	_	_
c40004_g1	6.21	0.05	-5.44	2.52e-09	9.51e-08	yes	down	_	_	_
c61743_g2	7.04	0.24	-4.4	2.52e-09	9.51e-08	yes	down	K13947	PIN	_
c48878_g1	1.08	209.19	7.47	2.53e-09	9.53e-08	yes	up	_	_	_
c24328_g1	4.75	0.19	-4.04	2.54e-09	9.57e-08	yes	down	_	_	_
c59823_g1	5.35	36.4	2.74	2.54e-09	9.57e-08	yes	up	_	_	_
c51353_g2	3.72	24.7	2.7	2.57e-09	9.66e-08	yes	up	_	_	_
c71178_g1	4.85	0.26	-3.78	2.57e-09	9.67e-08	yes	down	K00121	frmA, ADH5, adhC	path:ko00010;path:ko00071;path:ko00350;path:ko00625;path:ko00626;path:ko00680;path:ko00830;path:ko00980;path:ko00982;path:ko01100;path:ko01110;path:ko01120;path:ko01130;path:ko01200;path:ko01220;path:ko05204
c79542_g1	13.78	0.59	-4.33	2.61e-09	9.79e-08	yes	down	_	_	_
c59984_g2	7.96	0.07	-5.54	2.61e-09	9.79e-08	yes	down	_	_	_
c64004_g1	5.67	0.27	-3.98	2.63e-09	9.84e-08	yes	down	_	_	_
c63057_g1	22.36	2.13	-3.33	2.68e-09	1e-07	yes	down	_	_	_
c66858_g8	2.13	0	-4.48	2.68e-09	1e-07	yes	down	K09419	HSFF	_
c94402_g1	25.48	1.31	-4.19	2.7e-09	1.01e-07	yes	down	_	_	_
c70179_g1	13.71	0	-7.11	2.71e-09	1.01e-07	yes	down	_	_	_
c64890_g1	9.12	0.73	-3.48	2.71e-09	1.01e-07	yes	down	_	_	_
c66997_g6	33.43	197.1	2.56	2.72e-09	1.01e-07	yes	up	K01961	accC	path:ko00061;path:ko00253;path:ko00620;path:ko00640;path:ko00720;path:ko01100;path:ko01110;path:ko01120;path:ko01130;path:ko01200;path:ko01212
c60543_g1	0	0.47	2.51	2.72e-09	1.01e-07	yes	up	K10742	DNA2	path:ko03030
c58404_g1	428.01	28.92	-3.88	2.76e-09	1.02e-07	yes	down	_	_	_
c69418_g1	8.11	44.79	2.45	2.76e-09	1.02e-07	yes	up	_	_	_
c108618_g1	0.06	189.43	10.18	2.81e-09	1.04e-07	yes	up	_	_	_
c56026_g1	0.77	14.37	4.06	2.89e-09	1.07e-07	yes	up	K04125	E1.14.11.13	path:ko00904
c61785_g2	0	9.5	6.59	2.89e-09	1.07e-07	yes	up	_	_	_
c68014_g1	5.71	0.21	-4.24	2.92e-09	1.08e-07	yes	down	_	_	_
c102628_g1	11.49	0.41	-4.5	2.93e-09	1.08e-07	yes	down	_	_	_
c70885_g1	0.01	51.28	8.92	2.95e-09	1.09e-07	yes	up	_	_	_
c58114_g1	2.05	0.05	-3.89	2.99e-09	1.1e-07	yes	down	_	_	_
c67621_g1	3.15	0	-5.02	2.99e-09	1.1e-07	yes	down	_	_	_
c67753_g1	2.68	23.22	3.07	3e-09	1.1e-07	yes	up	K15559	RTT103	_
c23008_g1	5.31	0.1	-4.74	3.04e-09	1.12e-07	yes	down	_	_	_
c65657_g3	18.28	3.78	-2.24	3.07e-09	1.13e-07	yes	down	_	_	_
c70435_g1	0.81	11.81	3.71	3.11e-09	1.14e-07	yes	up	K16302	CNNM	_
c71412_g2	3.1	24.25	2.93	3.11e-09	1.14e-07	yes	up	_	_	_
c45539_g1	0.2	4.45	3.94	3.18e-09	1.16e-07	yes	up	_	_	_
c34149_g1	8.43	0.05	-5.79	3.22e-09	1.18e-07	yes	down	_	_	_
c65064_g1	6.18	0.28	-4.05	3.24e-09	1.18e-07	yes	down	K02717	psbP	path:ko00195;path:ko01100
c68101_g1	0	16.03	7.33	3.24e-09	1.18e-07	yes	up	K15397	KCS	path:ko00062;path:ko01110
c62059_g1	0.26	22.07	5.93	3.26e-09	1.19e-07	yes	up	_	_	_
c59719_g1	5.73	0.44	-3.44	3.26e-09	1.19e-07	yes	down	K09419	HSFF	_
c54235_g1	11.72	0.3	-4.89	3.31e-09	1.2e-07	yes	down	_	_	_
c26617_g1	112.08	24.46	-2.19	3.35e-09	1.22e-07	yes	down	K04035	E1.14.13.81, acsF, chlE	path:ko00860;path:ko01100;path:ko01110
c27107_g1	7.53	46.74	2.62	3.37e-09	1.22e-07	yes	up	_	_	_
c48691_g2	8.37	0.42	-4.03	3.47e-09	1.26e-07	yes	down	_	_	_
c1339_g1	59.86	14.3	-2.06	3.48e-09	1.26e-07	yes	down	K02113	ATPF1D, atpH	path:ko00190;path:ko00195;path:ko01100
c42259_g1	5.35	0	-5.77	3.49e-09	1.26e-07	yes	down	_	_	_
c45266_g1	0.03	10.01	6.32	3.5e-09	1.26e-07	yes	up	_	_	_
c38773_g1	0.17	221.92	9.66	3.51e-09	1.27e-07	yes	up	K13993	HSP20	path:ko04141
c68286_g1	6.13	181.66	4.87	3.58e-09	1.29e-07	yes	up	_	_	_
c67342_g1	2.33	0.07	-3.85	3.59e-09	1.3e-07	yes	down	_	_	_
c37759_g1	5.09	0.36	-3.49	3.71e-09	1.33e-07	yes	down	_	_	_
c66995_g5	143.17	31.05	-2.2	3.71e-09	1.33e-07	yes	down	K12657	ALDH18A1, P5CS	path:ko00330;path:ko01100;path:ko01110;path:ko01230
c67302_g2	0.06	144.82	9.84	3.73e-09	1.34e-07	yes	up	_	_	_
c56858_g1	155.8	17.85	-3.12	3.76e-09	1.35e-07	yes	down	K08909	LHCA3	path:ko00196
c70711_g4	5.64	0.22	-4.15	3.79e-09	1.36e-07	yes	down	_	_	_
c55240_g1	7.62	0.97	-2.85	3.82e-09	1.37e-07	yes	down	K15015	SLC32A, VGAT	path:ko04721;path:ko04723;path:ko04727;path:ko05032;path:ko05033
c68354_g5	1.75	0	-4.21	3.89e-09	1.39e-07	yes	down	K03549	kup	_
c71411_g1	24.44	160.58	2.71	3.9e-09	1.39e-07	yes	up	_	_	_
c67481_g2	0.01	3	4.81	3.92e-09	1.4e-07	yes	up	_	_	_
c63155_g1	0.26	13.33	5.22	3.98e-09	1.42e-07	yes	up	_	_	_
c68768_g2	0.04	17.65	7.01	4.08e-09	1.45e-07	yes	up	_	_	_
c52341_g1	5.74	0.22	-4.19	4.08e-09	1.45e-07	yes	down	K14638	SLC15A3_4, PHT	_
c61892_g1	2.9	0.04	-4.39	4.09e-09	1.46e-07	yes	down	_	_	_
c57265_g1	3.55	0.07	-4.44	4.15e-09	1.48e-07	yes	down	_	_	_
c49760_g1	6.69	0.1	-5.08	4.16e-09	1.48e-07	yes	down	_	_	_
c65236_g3	2.86	29.7	3.33	4.24e-09	1.5e-07	yes	up	K00058	serA, PHGDH	path:ko00260;path:ko00680;path:ko01100;path:ko01120;path:ko01130;path:ko01200;path:ko01230
c55893_g3	7.88	43.98	2.47	4.26e-09	1.51e-07	yes	up	K00036	G6PD, zwf	path:ko00030;path:ko00480;path:ko01100;path:ko01110;path:ko01120;path:ko01130;path:ko01200;path:ko05230
c58239_g2	3.25	0.05	-4.49	4.35e-09	1.54e-07	yes	down	_	_	_
c39122_g1	4.89	0.19	-4.11	4.39e-09	1.55e-07	yes	down	K17479	GRXCR1	_
c47224_g1	66.96	0.79	-6.23	4.41e-09	1.56e-07	yes	down	_	_	_
c51584_g1	2.6	0.12	-3.63	4.45e-09	1.57e-07	yes	down	_	_	_
c66201_g1	0.11	2.49	3.65	4.5e-09	1.59e-07	yes	up	_	_	_
c47308_g1	0.69	499.97	9.3	4.53e-09	1.6e-07	yes	up	_	_	_
c19130_g1	6.24	0	-5.99	4.63e-09	1.63e-07	yes	down	_	_	_
c63144_g1	1.9	0	-4.32	4.66e-09	1.64e-07	yes	down	_	_	_
c66427_g1	1.94	0.23	-2.65	4.73e-09	1.66e-07	yes	down	_	_	_
c65037_g1	37.48	2.82	-3.68	4.74e-09	1.66e-07	yes	down	K07088	K07088	_
c31121_g1	2.9	0	-4.91	4.76e-09	1.67e-07	yes	down	_	_	_
c70117_g1	3.39	28.65	3.04	4.78e-09	1.67e-07	yes	up	_	_	_
c73626_g1	5.58	0.3	-3.84	4.8e-09	1.68e-07	yes	down	_	_	_
c62512_g2	8.63	0.63	-3.58	4.86e-09	1.7e-07	yes	down	_	_	_
c50469_g1	13.9	2.52	-2.42	4.88e-09	1.7e-07	yes	down	_	_	_
c70214_g1	0	92.76	9.86	4.89e-09	1.71e-07	yes	up	K15400	HHT1	path:ko00073
c60574_g1	5.83	0.52	-3.26	4.91e-09	1.71e-07	yes	down	K09753	CCR	path:ko00940;path:ko01100;path:ko01110
c35041_g1	0.45	4.95	3.2	4.92e-09	1.71e-07	yes	up	K03549	kup	_
c70783_g5	636.2	143.08	-2.15	4.96e-09	1.73e-07	yes	down	K01177	E3.2.1.2	path:ko00500;path:ko01100
c95279_g1	23.63	4.01	-2.53	4.99e-09	1.73e-07	yes	down	_	_	_
c67951_g2	9.21	1.35	-2.69	4.99e-09	1.73e-07	yes	down	_	_	_
c29561_g1	0.08	58.56	8.38	5.07e-09	1.76e-07	yes	up	_	_	_
c63042_g1	5.45	32.96	2.57	5.16e-09	1.79e-07	yes	up	_	_	_
c48554_g1	0	3.19	5.04	5.16e-09	1.79e-07	yes	up	K07192	FLOT	path:ko04910
c49256_g1	0.01	12.38	6.84	5.23e-09	1.81e-07	yes	up	_	_	_
c25006_g1	0	3.33	5.1	5.23e-09	1.81e-07	yes	up	K05387	GRIP	_
c97132_g1	69.9	2.24	-4.9	5.32e-09	1.84e-07	yes	down	_	_	_
c50800_g1	2.98	0.07	-4.19	5.33e-09	1.84e-07	yes	down	_	_	_
c25728_g1	15.06	0.48	-4.7	5.37e-09	1.85e-07	yes	down	_	_	_
c94045_g1	4.36	0.34	-3.33	5.38e-09	1.85e-07	yes	down	K15397	KCS	path:ko00062;path:ko01110
c56790_g1	19.74	0.04	-7.12	5.46e-09	1.88e-07	yes	down	_	_	_
c25813_g1	9.15	0	-6.53	5.5e-09	1.89e-07	yes	down	_	_	_
c29005_g1	6.6	0.46	-3.58	5.57e-09	1.91e-07	yes	down	_	_	_
c60895_g1	2.33	0	-4.6	5.62e-09	1.93e-07	yes	down	_	_	_
c28858_g1	0.07	115.92	9.45	5.65e-09	1.94e-07	yes	up	_	_	_
c68164_g1	0.03	8.18	5.96	5.73e-09	1.96e-07	yes	up	_	_	_
c71655_g2	0.02	2.15	4.28	5.76e-09	1.97e-07	yes	up	_	_	_
c37570_g1	3.39	0.1	-4.09	5.79e-09	1.98e-07	yes	down	_	_	_
c50137_g2	44.56	6.85	-2.68	5.79e-09	1.98e-07	yes	down	_	_	_
c30668_g1	0.06	45.99	8.17	5.79e-09	1.98e-07	yes	up	_	_	_
c65270_g2	3.68	46.68	3.63	5.82e-09	1.99e-07	yes	up	K08235	E2.4.1.207	_
c63381_g1	9.36	1.11	-2.97	5.87e-09	2e-07	yes	down	_	_	_
c67245_g1	3.82	27.67	2.82	6.03e-09	2.05e-07	yes	up	_	_	_
c61843_g1	20.32	2.08	-3.23	6.07e-09	2.06e-07	yes	down	_	_	_
c15608_g2	22.56	1.58	-3.75	6.17e-09	2.1e-07	yes	down	_	_	_
c57929_g1	0.29	7.54	4.31	6.18e-09	2.1e-07	yes	up	_	_	_
c67571_g1	34.67	8	-2.1	6.19e-09	2.1e-07	yes	down	K12126	PIF3	path:ko04075;path:ko04712
c46609_g1	25.81	165.24	2.67	6.24e-09	2.11e-07	yes	up	_	_	_
c16261_g1	1.85	31.62	4.02	6.24e-09	2.11e-07	yes	up	_	_	_
c87612_g1	1.98	0	-4.38	6.25e-09	2.11e-07	yes	down	_	_	_
c62544_g1	40.35	8.94	-2.16	6.32e-09	2.14e-07	yes	down	K19269	PGP, PGLP	path:ko00630;path:ko01100;path:ko01110;path:ko01130;path:ko01200
c41516_g2	0	1.32	3.83	6.48e-09	2.19e-07	yes	up	_	_	_
c51235_g2	8.52	0.54	-3.75	6.49e-09	2.19e-07	yes	down	_	_	_
c53256_g2	0.01	19.7	7.49	6.49e-09	2.19e-07	yes	up	_	_	_
c3388_g1	10.52	65.28	2.62	6.5e-09	2.19e-07	yes	up	_	_	_
c43029_g1	3.32	0	-5.1	6.64e-09	2.23e-07	yes	down	_	_	_
c61944_g1	8.93	0.24	-4.74	6.68e-09	2.24e-07	yes	down	_	_	_
c64073_g1	0.03	67.22	8.98	6.71e-09	2.25e-07	yes	up	K07437	CYP26A	path:ko00830;path:ko01100
c52586_g2	35.31	4.78	-2.86	6.83e-09	2.29e-07	yes	down	K01762	ACS	path:ko00270;path:ko01100;path:ko01110
c53249_g1	0.72	0.02	-2.75	6.87e-09	2.3e-07	yes	down	K13457	RPM1, RPS3	path:ko04626
c64510_g2	0.61	8.61	3.62	6.93e-09	2.32e-07	yes	up	_	_	_
c35069_g1	0.37	10.94	4.56	6.98e-09	2.34e-07	yes	up	K00278	nadB	path:ko00250;path:ko00760;path:ko01100
c68378_g2	1.45	16.02	3.38	7.02e-09	2.34e-07	yes	up	K16903	TAA1	path:ko00380;path:ko01100
c68934_g2	8.09	0.83	-3.14	7.04e-09	2.35e-07	yes	down	_	_	_
c53756_g1	4.77	0	-5.61	7.04e-09	2.35e-07	yes	down	_	_	_
c28202_g1	3.2	0	-5.05	7.08e-09	2.36e-07	yes	down	_	_	_
c66322_g1	0.12	10.03	5.55	7.17e-09	2.39e-07	yes	up	_	_	_
c24383_g1	7.55	0.1	-5.27	7.21e-09	2.4e-07	yes	down	_	_	_
c65664_g1	1.51	15.14	3.24	7.23e-09	2.4e-07	yes	up	_	_	_
c67503_g3	0.05	10.64	6.19	7.38e-09	2.45e-07	yes	up	_	_	_
c68991_g2	2.99	0	-4.95	7.41e-09	2.46e-07	yes	down	K05747	WAS	path:ko04062;path:ko04144;path:ko04520;path:ko04666;path:ko04810;path:ko05100;path:ko05130;path:ko05131;path:ko05132;path:ko05231
c67876_g2	1.51	13.84	3.11	7.59e-09	2.52e-07	yes	up	_	_	_
c39750_g1	21.91	0	-7.78	7.71e-09	2.55e-07	yes	down	K15404	K15404, CER1	path:ko00073;path:ko01110
c108838_g1	17.68	122.94	2.79	7.99e-09	2.64e-07	yes	up	K01897	ACSL, fadD	path:ko00061;path:ko00071;path:ko01100;path:ko01212;path:ko03320;path:ko04146;path:ko04920
c63044_g1	0.02	3.28	4.86	8.04e-09	2.66e-07	yes	up	_	_	_
c65383_g1	15.9	0.25	-5.52	8.17e-09	2.7e-07	yes	down	_	_	_
c65312_g1	7.29	44.9	2.61	8.19e-09	2.7e-07	yes	up	K15920	XYL4	path:ko00500;path:ko00520;path:ko01100
c67365_g3	6.61	0.24	-4.32	8.39e-09	2.77e-07	yes	down	K18812	CYCD6	_
c73399_g1	0.08	5.13	4.83	8.4e-09	2.77e-07	yes	up	_	_	_
c69322_g3	0.2	27.44	6.5	8.57e-09	2.82e-07	yes	up	_	_	_
c65049_g1	2.97	0.05	-4.36	8.62e-09	2.83e-07	yes	down	_	_	_
c56176_g1	11.77	0.86	-3.63	8.98e-09	2.95e-07	yes	down	_	_	_
c6231_g1	1.48	0.06	-3.31	8.98e-09	2.95e-07	yes	down	_	_	_
c8526_g2	83.32	529.36	2.67	9.01e-09	2.95e-07	yes	up	_	_	_
c52099_g1	7.07	0.32	-4.08	9.02e-09	2.95e-07	yes	down	_	_	_
c94914_g1	117.22	0	-10.2	9.15e-09	2.99e-07	yes	down	_	_	_
c38583_g1	19.43	105.04	2.43	9.3e-09	3.04e-07	yes	up	K00627	DLAT, aceF, pdhC	path:ko00010;path:ko00020;path:ko00620;path:ko01100;path:ko01110;path:ko01120;path:ko01130;path:ko01200
c41107_g1	0.12	7.31	5.05	9.35e-09	3.05e-07	yes	up	_	_	_
c109073_g1	21.32	1.89	-3.43	9.37e-09	3.06e-07	yes	down	_	_	_
c64000_g1	19.34	1.8	-3.35	9.43e-09	3.07e-07	yes	down	K08232	E1.6.5.4	path:ko00053;path:ko01100
c71118_g1	32.2	4.11	-2.94	9.44e-09	3.07e-07	yes	down	_	_	_
c68621_g1	3.31	53.77	3.98	9.45e-09	3.07e-07	yes	up	_	_	_
c71237_g1	6.65	1.38	-2.19	9.55e-09	3.11e-07	yes	down	K08081	TR1	path:ko00960;path:ko01100;path:ko01110
c64336_g2	0.25	3.12	3.21	9.57e-09	3.11e-07	yes	up	_	_	_
c69572_g1	0	4.64	5.57	9.78e-09	3.17e-07	yes	up	_	_	_
c50860_g1	6.13	0.56	-3.23	9.87e-09	3.2e-07	yes	down	_	_	_
c39444_g1	48.13	11.48	-2.06	9.92e-09	3.21e-07	yes	down	_	_	_
c67466_g1	1.48	0.03	-3.6	9.98e-09	3.23e-07	yes	down	_	_	_
c61048_g2	12.45	2.32	-2.37	1e-08	3.24e-07	yes	down	K00423	E1.10.3.3	path:ko00053;path:ko01100
c12738_g1	46	261.61	2.51	1.01e-08	3.27e-07	yes	up	K08762	DBI, ACBP	path:ko03320
c40024_g1	0.78	44.49	5.66	1.02e-08	3.3e-07	yes	up	_	_	_
c65929_g1	0.05	66.59	8.78	1.02e-08	3.3e-07	yes	up	_	_	_
c61094_g1	1.38	0	-3.89	1.04e-08	3.36e-07	yes	down	_	_	_
c71707_g2	96.59	2.57	-5.18	1.04e-08	3.36e-07	yes	down	K00430	E1.11.1.7	path:ko00940;path:ko01100;path:ko01110
c69551_g6	0	1.19	3.69	1.05e-08	3.37e-07	yes	up	_	_	_
c48146_g2	3.15	0.04	-4.5	1.07e-08	3.43e-07	yes	down	_	_	_
c70196_g1	0.01	1.77	4.06	1.07e-08	3.43e-07	yes	up	_	_	_
c16227_g1	0.04	3.56	4.69	1.07e-08	3.44e-07	yes	up	_	_	_
c50196_g1	275.86	1546.54	2.49	1.08e-08	3.44e-07	yes	up	K08245	E3.4.23.40	_
c55605_g1	21.16	163.06	2.94	1.08e-08	3.44e-07	yes	up	_	_	_
c67104_g4	0	2.41	4.65	1.08e-08	3.44e-07	yes	up	_	_	_
c29280_g1	0	17.26	7.44	1.09e-08	3.49e-07	yes	up	K05909	E1.10.3.2	_
c79472_g1	8.25	52.6	2.66	1.1e-08	3.53e-07	yes	up	_	_	_
c57357_g1	36.59	398.16	3.44	1.12e-08	3.58e-07	yes	up	_	_	_
c68542_g1	1.65	0	-4.13	1.13e-08	3.6e-07	yes	down	_	_	_
c40099_g1	53.65	293.47	2.45	1.14e-08	3.65e-07	yes	up	_	_	_
c8391_g1	4.36	0.22	-3.8	1.15e-08	3.65e-07	yes	down	K19476	IST1	path:ko04144
c54038_g1	2.37	0.05	-4.02	1.15e-08	3.65e-07	yes	down	_	_	_
c65405_g2	8.76	0.91	-3.13	1.15e-08	3.66e-07	yes	down	_	_	_
c56900_g2	15.36	1.31	-3.45	1.15e-08	3.66e-07	yes	down	K01802	E5.2.1.8	_
c68472_g6	1.69	0	-4.17	1.16e-08	3.69e-07	yes	down	_	_	_
c56118_g1	0.34	34.28	6.29	1.17e-08	3.71e-07	yes	up	_	_	_
c35390_g1	3.36	0.13	-3.93	1.18e-08	3.74e-07	yes	down	_	_	_
c71185_g3	2.84	0.02	-4.61	1.18e-08	3.74e-07	yes	down	_	_	_
c23691_g1	0.03	2.02	4.06	1.2e-08	3.79e-07	yes	up	_	_	_
c16511_g1	73.61	11.22	-2.7	1.21e-08	3.82e-07	yes	down	_	_	_
c63519_g2	815.99	173.57	-2.23	1.21e-08	3.83e-07	yes	down	_	_	_
c50270_g1	2.85	0.12	-3.71	1.24e-08	3.91e-07	yes	down	_	_	_
c65552_g2	34.44	5.53	-2.62	1.24e-08	3.91e-07	yes	down	_	_	_
c70086_g1	5.43	0.04	-5.35	1.25e-08	3.94e-07	yes	down	_	_	_
c87001_g1	19.65	104.3	2.4	1.25e-08	3.94e-07	yes	up	K00873	PK, pyk	path:ko00010;path:ko00230;path:ko00620;path:ko01100;path:ko01110;path:ko01120;path:ko01130;path:ko01200;path:ko01230;path:ko04922;path:ko04930;path:ko05203;path:ko05230
c56561_g1	1.51	0.02	-3.74	1.26e-08	3.96e-07	yes	down	_	_	_
c38672_g1	0.93	0	-3.36	1.26e-08	3.97e-07	yes	down	K01611	speD, AMD1	path:ko00270;path:ko00330;path:ko01100
c30662_g2	2.44	14.59	2.53	1.27e-08	3.99e-07	yes	up	_	_	_
c11470_g1	6.85	0.11	-5.08	1.28e-08	4.02e-07	yes	down	_	_	_
c64630_g1	2.32	0	-4.6	1.29e-08	4.04e-07	yes	down	_	_	_
c61743_g3	4.12	0.29	-3.43	1.29e-08	4.05e-07	yes	down	K13947	PIN	_
c63805_g1	2.11	31.99	3.86	1.3e-08	4.06e-07	yes	up	_	_	_
c27062_g1	1.79	227.72	6.91	1.32e-08	4.11e-07	yes	up	_	_	_
c66520_g2	4.05	0.41	-3.02	1.37e-08	4.29e-07	yes	down	_	_	_
c49802_g2	12.08	0	-6.93	1.39e-08	4.32e-07	yes	down	K00430	E1.11.1.7	path:ko00940;path:ko01100;path:ko01110
c38244_g1	4.15	0.28	-3.47	1.39e-08	4.33e-07	yes	down	_	_	_
c23481_g1	2.08	192.19	6.46	1.39e-08	4.33e-07	yes	up	_	_	_
c38817_g1	3.31	42.04	3.63	1.4e-08	4.36e-07	yes	up	_	_	_
c41096_g1	179.99	5.17	-5.09	1.41e-08	4.37e-07	yes	down	K08916	LHCB5	path:ko00196;path:ko01100
c55318_g1	6.41	0.23	-4.28	1.42e-08	4.4e-07	yes	down	_	_	_
c87290_g1	1.32	16.25	3.53	1.43e-08	4.42e-07	yes	up	K00797	speE, SRM	path:ko00270;path:ko00330;path:ko00410;path:ko00480;path:ko01100
c62197_g1	0.01	1.46	3.85	1.43e-08	4.42e-07	yes	up	_	_	_
c59013_g1	16.25	2.26	-2.79	1.43e-08	4.43e-07	yes	down	K02639	petF	path:ko00195
c62668_g1	5.64	0.15	-4.53	1.44e-08	4.45e-07	yes	down	_	_	_
c16561_g2	6.28	0	-6	1.44e-08	4.45e-07	yes	down	K09422	MYBP	_
c67615_g2	2.02	28.81	3.77	1.44e-08	4.45e-07	yes	up	K14759	PHYLLO	path:ko00130;path:ko01100;path:ko01110
c69841_g2	0.03	16.72	7.05	1.44e-08	4.45e-07	yes	up	_	_	_
c38224_g1	47.63	8.17	-2.53	1.46e-08	4.49e-07	yes	down	_	_	_
c30287_g1	67	9.66	-2.78	1.46e-08	4.5e-07	yes	down	_	_	_
c40366_g1	8.49	110.78	3.69	1.46e-08	4.5e-07	yes	up	K18491	ESX1	path:ko04550
c58446_g1	2.21	81.18	5.14	1.47e-08	4.54e-07	yes	up	_	_	_
c38649_g1	7.02	0.18	-4.67	1.5e-08	4.6e-07	yes	down	_	_	_
c63189_g2	962.1	26.86	-5.16	1.51e-08	4.64e-07	yes	down	K01602	rbcS	path:ko00630;path:ko00710;path:ko01100;path:ko01120;path:ko01200
c22155_g1	1.83	0.06	-3.63	1.55e-08	4.76e-07	yes	down	_	_	_
c7658_g1	0	25.54	8	1.56e-08	4.77e-07	yes	up	K09843	E1.14.13.93	path:ko00906
c19041_g1	2.21	0	-4.53	1.56e-08	4.77e-07	yes	down	_	_	_
c40444_g1	29.35	4.11	-2.8	1.58e-08	4.83e-07	yes	down	K15746	crtZ	path:ko00906;path:ko01100;path:ko01110
c2484_g2	5.47	0	-5.8	1.59e-08	4.86e-07	yes	down	_	_	_
c420_g1	58.71	326.11	2.47	1.6e-08	4.88e-07	yes	up	K00059	fabG	path:ko00061;path:ko00780;path:ko01040;path:ko01100;path:ko01212
c52839_g1	42.47	7.25	-2.53	1.6e-08	4.88e-07	yes	down	_	_	_
c61136_g2	141.76	18.9	-2.9	1.6e-08	4.88e-07	yes	down	_	_	_
c3431_g1	4.05	0.09	-4.48	1.6e-08	4.89e-07	yes	down	_	_	_
c37713_g1	1.88	0.03	-3.94	1.61e-08	4.91e-07	yes	down	_	_	_
c58369_g1	5.51	0.13	-4.63	1.61e-08	4.91e-07	yes	down	_	_	_
c66060_g1	0.03	2.94	4.58	1.63e-08	4.97e-07	yes	up	_	_	_
c59473_g3	2.56	0.03	-4.33	1.64e-08	4.97e-07	yes	down	_	_	_
c70204_g1	19.09	0.4	-5.27	1.65e-08	5.01e-07	yes	down	K01723	AOS	path:ko00592;path:ko01100;path:ko01110
c55105_g1	0	15.42	7.28	1.65e-08	5.01e-07	yes	up	_	_	_
c61700_g1	15.89	1.91	-2.99	1.66e-08	5.02e-07	yes	down	K05894	OPR	path:ko00592;path:ko01100;path:ko01110
c70303_g3	31.99	1.15	-4.68	1.66e-08	5.02e-07	yes	down	_	_	_
c37761_g1	3.56	18.75	2.37	1.67e-08	5.05e-07	yes	up	_	_	_
c39686_g3	1.77	32.29	4.11	1.69e-08	5.11e-07	yes	up	K00895	E2.7.1.90, pfk	path:ko00051
c53488_g1	1.93	0.07	-3.56	1.69e-08	5.11e-07	yes	down	_	_	_
c9155_g1	2.64	0.1	-3.79	1.69e-08	5.11e-07	yes	down	K13352	PEX11B	path:ko04146
c28202_g2	3.34	0	-5.11	1.75e-08	5.29e-07	yes	down	_	_	_
c39389_g1	8.28	0.43	-3.97	1.76e-08	5.3e-07	yes	down	K03768	PPIB, ppiB	_
c40974_g1	0	0.96	3.41	1.8e-08	5.42e-07	yes	up	_	_	_
c54603_g1	7.11	0.21	-4.53	1.8e-08	5.42e-07	yes	down	_	_	_
c26925_g1	22.21	113.02	2.34	1.81e-08	5.45e-07	yes	up	K14455	GOT2	path:ko00220;path:ko00250;path:ko00270;path:ko00330;path:ko00350;path:ko00360;path:ko00400;path:ko00710;path:ko00950;path:ko00960;path:ko01100;path:ko01110;path:ko01120;path:ko01130;path:ko01200;path:ko01210;path:ko01230;path:ko04975
c68899_g3	6.16	35.46	2.51	1.82e-08	5.45e-07	yes	up	_	_	_
c63601_g1	2.71	0.34	-2.67	1.85e-08	5.55e-07	yes	down	K10742	DNA2	path:ko03030
c103773_g1	6.25	0.21	-4.35	1.86e-08	5.56e-07	yes	down	_	_	_
c17241_g1	4.62	0.23	-3.83	1.93e-08	5.79e-07	yes	down	_	_	_
c60718_g2	1.73	25.44	3.81	1.94e-08	5.82e-07	yes	up	K09422	MYBP	_
c52544_g1	4.98	0.06	-5.01	1.98e-08	5.92e-07	yes	down	K01188	E3.2.1.21	path:ko00460;path:ko00500;path:ko00940;path:ko01100;path:ko01110
c65260_g1	16.13	3.08	-2.35	1.99e-08	5.96e-07	yes	down	_	_	_
c62489_g1	26.11	6.47	-2	2.03e-08	6.06e-07	yes	down	_	_	_
c70185_g1	5.08	43.23	3.06	2.05e-08	6.13e-07	yes	up	_	_	_
c49274_g1	0.32	17.84	5.4	2.05e-08	6.13e-07	yes	up	K08235	E2.4.1.207	_
c60445_g2	0.1	7.58	5.24	2.07e-08	6.16e-07	yes	up	_	_	_
c32846_g1	0.07	29.34	7.43	2.08e-08	6.18e-07	yes	up	_	_	_
c44762_g1	0.13	2.49	3.47	2.1e-08	6.26e-07	yes	up	K07466	RFA1, RPA1, rpa	path:ko03030;path:ko03420;path:ko03430;path:ko03440;path:ko03460
c66722_g5	0.02	2.86	4.64	2.13e-08	6.32e-07	yes	up	_	_	_
c8797_g1	0.04	1.67	3.69	2.15e-08	6.4e-07	yes	up	_	_	_
c71634_g4	5.03	0.44	-3.26	2.17e-08	6.43e-07	yes	down	_	_	_
c39686_g1	2.35	38.46	3.98	2.18e-08	6.45e-07	yes	up	K00895	E2.7.1.90, pfk	path:ko00051
c63399_g1	2.61	108.96	5.33	2.19e-08	6.48e-07	yes	up	_	_	_
c68631_g1	1.43	0.01	-3.74	2.2e-08	6.51e-07	yes	down	_	_	_
c67111_g1	24.54	4.13	-2.54	2.2e-08	6.52e-07	yes	down	_	_	_
c67698_g2	1.11	17.7	3.87	2.21e-08	6.54e-07	yes	up	_	_	_
c37757_g1	40.65	217.76	2.42	2.26e-08	6.66e-07	yes	up	K00627	DLAT, aceF, pdhC	path:ko00010;path:ko00020;path:ko00620;path:ko01100;path:ko01110;path:ko01120;path:ko01130;path:ko01200
c45976_g1	0.99	0	-3.45	2.26e-08	6.67e-07	yes	down	_	_	_
c61623_g1	200.18	21.89	-3.19	2.28e-08	6.73e-07	yes	down	_	_	_
c28737_g2	3.93	0	-5.33	2.29e-08	6.73e-07	yes	down	K11238	BNI1	path:ko04011
c58568_g1	1.72	170.67	6.55	2.32e-08	6.82e-07	yes	up	_	_	_
c42472_g1	0.42	138.47	8.06	2.32e-08	6.83e-07	yes	up	_	_	_
c70285_g4	0.25	8.17	4.55	2.35e-08	6.91e-07	yes	up	_	_	_
c69070_g4	4.82	34.31	2.8	2.37e-08	6.96e-07	yes	up	K10775	E4.3.1.24	path:ko00360;path:ko00940;path:ko01100;path:ko01110
c34226_g1	0	11.08	6.8	2.37e-08	6.97e-07	yes	up	_	_	_
c63488_g1	0.27	9.82	4.76	2.38e-08	6.98e-07	yes	up	K14638	SLC15A3_4, PHT	_
c60360_g1	3.5	0	-5.17	2.38e-08	6.99e-07	yes	down	_	_	_
c60676_g1	2.81	42.12	3.86	2.39e-08	7e-07	yes	up	K14638	SLC15A3_4, PHT	_
c70226_g1	30.96	184.38	2.57	2.44e-08	7.14e-07	yes	up	_	_	_
c69874_g3	4.2	0.19	-3.91	2.47e-08	7.23e-07	yes	down	_	_	_
c27111_g1	3.4	279.45	6.32	2.48e-08	7.25e-07	yes	up	_	_	_
c62924_g1	1.84	0.04	-3.75	2.49e-08	7.25e-07	yes	down	_	_	_
c38493_g1	5.72	0.17	-4.43	2.54e-08	7.39e-07	yes	down	_	_	_
c63153_g1	2.97	0.03	-4.58	2.54e-08	7.41e-07	yes	down	_	_	_
c49764_g3	7.35	0	-6.22	2.56e-08	7.44e-07	yes	down	_	_	_
c62703_g3	2.15	0	-4.49	2.6e-08	7.57e-07	yes	down	_	_	_
c65487_g2	0.73	0.01	-2.89	2.62e-08	7.62e-07	yes	down	K14760	AAE14	path:ko00130;path:ko01100;path:ko01110
c79416_g1	5.21	0.29	-3.77	2.64e-08	7.68e-07	yes	down	_	_	_
c8582_g2	23.86	1.96	-3.54	2.66e-08	7.7e-07	yes	down	K17279	REEP5_6	_
c63920_g1	0	2.05	4.43	2.66e-08	7.7e-07	yes	up	_	_	_
c51324_g1	0	11.94	6.91	2.68e-08	7.77e-07	yes	up	_	_	_
c68616_g2	10.84	0.23	-5.07	2.68e-08	7.77e-07	yes	down	_	_	_
c51898_g1	3.49	0.16	-3.78	2.69e-08	7.78e-07	yes	down	K03327	TC.MATE, SLC47A, norM, mdtK, dinF	_
c63852_g3	0	37.43	8.55	2.75e-08	7.94e-07	yes	up	K07437	CYP26A	path:ko00830;path:ko01100
c47645_g1	0.23	16.41	5.63	2.75e-08	7.94e-07	yes	up	_	_	_
c67118_g1	0.07	2.57	3.96	2.79e-08	8.04e-07	yes	up	_	_	_
c36852_g1	51.25	9.19	-2.47	2.8e-08	8.08e-07	yes	down	_	_	_
c69873_g5	36.12	4.25	-3.06	2.81e-08	8.11e-07	yes	down	_	_	_
c10374_g1	0.08	7.33	5.38	2.84e-08	8.18e-07	yes	up	K00695	E2.4.1.13	path:ko00500;path:ko01100
c62268_g1	4	0	-5.36	2.88e-08	8.28e-07	yes	down	_	_	_
c56025_g1	3.19	48.89	3.9	2.89e-08	8.3e-07	yes	up	_	_	_
c67979_g1	0.65	196.02	8.03	2.89e-08	8.31e-07	yes	up	_	_	_
c16609_g1	15.07	0.52	-4.61	2.93e-08	8.4e-07	yes	down	_	_	_
c15557_g1	0.04	1.31	3.36	2.97e-08	8.53e-07	yes	up	_	_	_
c55303_g1	5.74	0.25	-4.08	2.99e-08	8.58e-07	yes	down	K01051	E3.1.1.11	path:ko00040;path:ko00500;path:ko01100
c65125_g1	0.02	17.91	7.27	3.08e-08	8.82e-07	yes	up	_	_	_
c66142_g1	0.05	1.39	3.28	3.09e-08	8.83e-07	yes	up	_	_	_
c69617_g2	5.53	0.28	-3.9	3.12e-08	8.91e-07	yes	down	_	_	_
c61164_g3	65.28	15	-2.11	3.12e-08	8.92e-07	yes	down	K17279	REEP5_6	_
c25615_g1	2.34	0.04	-4.16	3.16e-08	9.01e-07	yes	down	_	_	_
c16348_g1	2.84	0.12	-3.74	3.16e-08	9.01e-07	yes	down	K14484	IAA	path:ko04075
c62945_g1	1.49	0.03	-3.63	3.17e-08	9.05e-07	yes	down	_	_	_
c59465_g1	24.42	1.53	-3.92	3.23e-08	9.18e-07	yes	down	_	_	_
c9392_g1	10.34	0.13	-5.47	3.29e-08	9.35e-07	yes	down	_	_	_
c8326_g1	178.49	28.22	-2.66	3.3e-08	9.38e-07	yes	down	_	_	_
c68928_g3	6.41	67.01	3.36	3.32e-08	9.43e-07	yes	up	_	_	_
c57431_g1	0.16	3.64	3.85	3.39e-08	9.61e-07	yes	up	_	_	_
c52220_g1	7.41	0.6	-3.42	3.4e-08	9.64e-07	yes	down	_	_	_
c51623_g1	52.49	1.03	-5.55	3.43e-08	9.73e-07	yes	down	K08902	psb27	path:ko00195;path:ko01100
c48365_g1	5.91	66.82	3.48	3.46e-08	9.8e-07	yes	up	K08242	E2.1.1.143	path:ko00100;path:ko01110
c39210_g1	3.31	0.29	-3.13	3.48e-08	9.85e-07	yes	down	K12125	ELF3	path:ko04712
c69428_g1	10.04	0.71	-3.65	3.48e-08	9.85e-07	yes	down	_	_	_
c66088_g3	3.53	0.13	-3.98	3.51e-08	9.93e-07	yes	down	_	_	_
c53684_g1	0.16	4.93	4.3	3.52e-08	9.94e-07	yes	up	_	_	_
c71079_g4	11.02	0.78	-3.66	3.57e-08	1.01e-06	yes	down	_	_	_
c88557_g1	5.35	0.3	-3.75	3.58e-08	1.01e-06	yes	down	_	_	_
c67456_g1	11.81	0.88	-3.6	3.59e-08	1.01e-06	yes	down	K13496	UGT73C	path:ko01110
c53922_g1	1.51	0.06	-3.3	3.62e-08	1.02e-06	yes	down	_	_	_
c58571_g2	4.48	40.39	3.15	3.69e-08	1.04e-06	yes	up	_	_	_
c63941_g1	63.25	16.43	-1.94	3.7e-08	1.04e-06	yes	down	_	_	_
c59369_g2	0.08	15.1	6.39	3.71e-08	1.04e-06	yes	up	_	_	_
c71073_g3	8.1	0	-6.36	3.76e-08	1.05e-06	yes	down	_	_	_
c64591_g2	93.4	22.08	-2.08	3.76e-08	1.05e-06	yes	down	K14209	SLC36A, PAT	_
c60412_g2	1.7	11.9	2.74	3.8e-08	1.06e-06	yes	up	_	_	_
c57781_g2	2.43	0.03	-4.3	3.8e-08	1.06e-06	yes	down	K00434	E1.11.1.11	path:ko00053;path:ko00480
c53126_g1	3.19	0.07	-4.31	3.8e-08	1.06e-06	yes	down	_	_	_
c66001_g1	1.85	0.03	-3.89	3.83e-08	1.07e-06	yes	down	_	_	_
c50200_g1	0.79	13.24	3.91	3.89e-08	1.09e-06	yes	up	_	_	_
c69855_g1	40.36	10.34	-1.95	3.89e-08	1.09e-06	yes	down	K07760	CDK	_
c58131_g2	4.7	0.42	-3.22	3.89e-08	1.09e-06	yes	down	K01187	malZ	path:ko00052;path:ko00500;path:ko01100
c61276_g1	1.53	0	-4.02	3.89e-08	1.09e-06	yes	down	_	_	_
c63261_g1	3.32	0.09	-4.14	3.94e-08	1.1e-06	yes	down	_	_	_
c31263_g2	2.74	0.04	-4.3	3.98e-08	1.11e-06	yes	down	_	_	_
c61707_g2	3.48	0.64	-2.28	4.11e-08	1.14e-06	yes	down	_	_	_
c68980_g1	3.7	0.15	-3.9	4.11e-08	1.14e-06	yes	down	_	_	_
c8605_g1	8.98	62.86	2.79	4.12e-08	1.14e-06	yes	up	_	_	_
c69141_g2	2.18	44.7	4.3	4.12e-08	1.14e-06	yes	up	K03103	MINPP1	path:ko00010;path:ko00562;path:ko01100
c57764_g1	0.12	433.74	10.93	4.14e-08	1.15e-06	yes	up	_	_	_
c18823_g1	17.68	98.06	2.46	4.15e-08	1.15e-06	yes	up	K01658	trpG	path:ko00400;path:ko01100;path:ko01110;path:ko01130;path:ko01230
c66835_g1	3.61	0	-5.21	4.18e-08	1.16e-06	yes	down	_	_	_
c51495_g1	0.68	14.39	4.22	4.2e-08	1.16e-06	yes	up	K09422	MYBP	_
c68489_g2	19.72	207.92	3.39	4.26e-08	1.18e-06	yes	up	_	_	_
c59842_g1	3.01	0	-4.96	4.28e-08	1.18e-06	yes	down	K14826	FPR3_4	_
c50391_g1	1.13	67.1	5.77	4.28e-08	1.18e-06	yes	up	_	_	_
c54313_g1	12.76	0.27	-5.11	4.3e-08	1.18e-06	yes	down	K13680	CSLA	_
c36842_g1	13.3	77.96	2.54	4.3e-08	1.18e-06	yes	up	K00873	PK, pyk	path:ko00010;path:ko00230;path:ko00620;path:ko01100;path:ko01110;path:ko01120;path:ko01130;path:ko01200;path:ko01230;path:ko04922;path:ko04930;path:ko05203;path:ko05230
c71645_g2	0.02	2.75	4.62	4.3e-08	1.18e-06	yes	up	_	_	_
c34824_g1	6.24	55.88	3.14	4.34e-08	1.19e-06	yes	up	_	_	_
c71005_g1	28.74	1.92	-3.84	4.37e-08	1.2e-06	yes	down	_	_	_
c15483_g1	13.79	1.52	-3.1	4.38e-08	1.2e-06	yes	down	K04040	chlG, bchG	path:ko00860;path:ko01100;path:ko01110
c70039_g1	5.5	0.55	-3.1	4.41e-08	1.21e-06	yes	down	_	_	_
c63812_g1	14.23	3.14	-2.14	4.49e-08	1.23e-06	yes	down	_	_	_
c64315_g1	0.02	16.44	7.12	4.49e-08	1.23e-06	yes	up	_	_	_
c66470_g1	22.97	3.92	-2.52	4.52e-08	1.24e-06	yes	down	_	_	_
c55538_g1	2.39	0.05	-4.1	4.52e-08	1.24e-06	yes	down	_	_	_
c59845_g1	0.28	10.12	4.73	4.58e-08	1.25e-06	yes	up	K02639	petF	path:ko00195
c57685_g2	0.89	28.33	4.85	4.79e-08	1.31e-06	yes	up	K13508	GPAT	path:ko00561;path:ko00564;path:ko01100;path:ko01110
c70182_g1	0.07	2.89	4.16	4.82e-08	1.32e-06	yes	up	_	_	_
c66407_g1	0	2.92	4.92	4.83e-08	1.32e-06	yes	up	_	_	_
c46462_g1	179.34	13.54	-3.72	4.83e-08	1.32e-06	yes	down	_	_	_
c1289_g1	4.24	0	-5.44	4.88e-08	1.33e-06	yes	down	_	_	_
c64519_g2	0.03	2.11	4.14	4.93e-08	1.34e-06	yes	up	_	_	_
c46323_g1	0.06	5.82	5.19	4.96e-08	1.35e-06	yes	up	_	_	_
c66922_g1	3.15	0	-5.02	5e-08	1.36e-06	yes	down	_	_	_
c65293_g1	0.04	4.25	4.98	5.01e-08	1.36e-06	yes	up	K09422	MYBP	_
c46030_g1	2.04	29.4	3.79	5.09e-08	1.38e-06	yes	up	K05277	E1.14.11.19	path:ko00941;path:ko01100;path:ko01110
c58518_g1	3.72	0.14	-3.98	5.16e-08	1.4e-06	yes	down	_	_	_
c62362_g1	3.3	0.16	-3.72	5.23e-08	1.42e-06	yes	down	_	_	_
c61958_g1	0.86	0	-3.26	5.23e-08	1.42e-06	yes	down	_	_	_
c62600_g1	0.73	52.91	6	5.32e-08	1.44e-06	yes	up	K01051	E3.1.1.11	path:ko00040;path:ko00500;path:ko01100
c63717_g1	33.23	0.5	-5.8	5.33e-08	1.44e-06	yes	down	K12153	CYP79A2	path:ko00460;path:ko00966;path:ko01110;path:ko01210
c53171_g1	1.98	49.74	4.58	5.36e-08	1.45e-06	yes	up	_	_	_
c64583_g4	0.15	10.55	5.39	5.44e-08	1.47e-06	yes	up	K07904	RAB11A	path:ko04144;path:ko04961;path:ko04962;path:ko04972
c66799_g5	14.76	91.73	2.63	5.44e-08	1.47e-06	yes	up	_	_	_
c69456_g2	16.9	2.05	-2.98	5.47e-08	1.48e-06	yes	down	K14484	IAA	path:ko04075
c61535_g3	1.13	7.92	2.71	5.52e-08	1.49e-06	yes	up	_	_	_
c71271_g2	33.88	7.55	-2.15	5.64e-08	1.52e-06	yes	down	K08360	CYB561	_
c65805_g1	0.67	0.01	-2.86	5.66e-08	1.52e-06	yes	down	_	_	_
c68888_g1	0	8.38	6.41	5.67e-08	1.52e-06	yes	up	_	_	_
c64690_g1	201.5	44.77	-2.17	5.73e-08	1.54e-06	yes	down	K09286	EREBP	_
c55467_g1	14.31	2.96	-2.24	5.75e-08	1.54e-06	yes	down	_	_	_
c62824_g1	1.58	0	-4.07	5.79e-08	1.55e-06	yes	down	_	_	_
c69291_g2	1.22	25.09	4.25	5.8e-08	1.55e-06	yes	up	K09285	OVM, ANT	_
c38911_g2	18.07	0.88	-4.21	5.89e-08	1.58e-06	yes	down	_	_	_
c47690_g1	14.27	0.67	-4.23	5.9e-08	1.58e-06	yes	down	_	_	_
c67613_g3	0.49	5.28	3.18	5.91e-08	1.58e-06	yes	up	_	_	_
c49803_g1	2.78	0.28	-2.93	5.92e-08	1.58e-06	yes	down	_	_	_
c38733_g1	2.95	0.36	-2.73	5.92e-08	1.58e-06	yes	down	_	_	_
c59638_g2	6.16	0.55	-3.27	5.93e-08	1.58e-06	yes	down	_	_	_
c49358_g1	0.02	49.08	8.63	5.98e-08	1.59e-06	yes	up	_	_	_
c89910_g1	0	0.84	3.24	6e-08	1.6e-06	yes	up	_	_	_
c59740_g1	1.23	78.58	5.89	6.07e-08	1.62e-06	yes	up	_	_	_
c54893_g1	0	10.67	6.75	6.07e-08	1.62e-06	yes	up	_	_	_
c27014_g1	4.1	0.17	-3.98	6.12e-08	1.63e-06	yes	down	_	_	_
c68523_g1	1.03	0.01	-3.39	6.13e-08	1.63e-06	yes	down	_	_	_
c20536_g1	3.12	0.15	-3.71	6.15e-08	1.63e-06	yes	down	_	_	_
c59324_g2	18.94	4.5	-2.05	6.2e-08	1.65e-06	yes	down	_	_	_
c58834_g1	0.02	3.76	4.97	6.35e-08	1.68e-06	yes	up	_	_	_
c41219_g1	3.59	0.18	-3.73	6.37e-08	1.69e-06	yes	down	_	_	_
c18439_g1	10.16	1.33	-2.85	6.39e-08	1.69e-06	yes	down	K12271	SRP43, CAO	_
c42907_g1	0.12	2.78	3.71	6.42e-08	1.7e-06	yes	up	_	_	_
c65475_g1	3.57	0.18	-3.71	6.48e-08	1.71e-06	yes	down	_	_	_
c41370_g1	7.06	195.36	4.77	6.48e-08	1.71e-06	yes	up	_	_	_
c71128_g5	2.74	36.96	3.71	6.5e-08	1.72e-06	yes	up	_	_	_
c63494_g1	42.91	0	-8.75	6.52e-08	1.72e-06	yes	down	_	_	_
c58761_g1	0	9.45	6.58	6.52e-08	1.72e-06	yes	up	_	_	_
c40797_g1	0	1.56	4.05	6.53e-08	1.72e-06	yes	up	_	_	_
c87284_g1	0.05	57.1	8.56	6.57e-08	1.73e-06	yes	up	K00430	E1.11.1.7	path:ko00940;path:ko01100;path:ko01110
c61319_g3	35.54	8.59	-2.04	6.64e-08	1.75e-06	yes	down	K00789	metK	path:ko00270;path:ko01100;path:ko01110;path:ko01230
c13836_g1	1.97	0	-4.37	6.65e-08	1.75e-06	yes	down	_	_	_
c47709_g2	1.66	0.03	-3.78	6.67e-08	1.75e-06	yes	down	K00423	E1.10.3.3	path:ko00053;path:ko01100
c62776_g1	0.82	15.11	4.04	6.74e-08	1.77e-06	yes	up	K09646	SCPEP1	_
c43180_g1	4.61	0.2	-3.98	6.78e-08	1.78e-06	yes	down	_	_	_
c44008_g1	23.58	2.17	-3.38	7e-08	1.83e-06	yes	down	K08232	E1.6.5.4	path:ko00053;path:ko01100
c71141_g3	0.86	11.19	3.56	7.05e-08	1.85e-06	yes	up	_	_	_
c63173_g1	2.51	0	-4.71	7.09e-08	1.85e-06	yes	down	_	_	_
c69485_g1	31.87	4.58	-2.77	7.1e-08	1.86e-06	yes	down	K01662	dxs	path:ko00730;path:ko00900;path:ko01100;path:ko01110;path:ko01130
c64386_g1	35.87	5.2	-2.76	7.11e-08	1.86e-06	yes	down	_	_	_
c70014_g1	0.01	24.26	7.78	7.13e-08	1.86e-06	yes	up	_	_	_
c70248_g1	8.71	0.36	-4.26	7.18e-08	1.87e-06	yes	down	K18108	E4.2.3.111	path:ko00902;path:ko01100;path:ko01110
c68876_g1	6.29	0.64	-3.11	7.18e-08	1.87e-06	yes	down	_	_	_
c46632_g1	3.91	117.55	4.87	7.31e-08	1.9e-06	yes	up	_	_	_
c36827_g1	4.11	24.76	2.56	7.41e-08	1.93e-06	yes	up	_	_	_
c37404_g1	3.14	148.06	5.51	7.49e-08	1.95e-06	yes	up	_	_	_
c70817_g1	1.85	18.96	3.29	7.5e-08	1.95e-06	yes	up	_	_	_
c108622_g1	519.54	90.3	-2.52	7.54e-08	1.96e-06	yes	down	_	_	_
c54457_g1	16.6	0.13	-6.18	7.55e-08	1.96e-06	yes	down	_	_	_
c69951_g1	8.7	193.01	4.46	7.58e-08	1.97e-06	yes	up	_	_	_
c54391_g1	0	9.17	6.54	7.59e-08	1.97e-06	yes	up	_	_	_
c21948_g1	2.73	0.05	-4.25	7.66e-08	1.99e-06	yes	down	_	_	_
c63036_g2	11.7	59.84	2.34	7.71e-08	2e-06	yes	up	K15918	GLYK	path:ko00260;path:ko00561;path:ko00630;path:ko01100;path:ko01110;path:ko01130;path:ko01200
c59035_g1	2.06	0.08	-3.56	7.75e-08	2.01e-06	yes	down	_	_	_
c59454_g1	2.22	0	-4.53	7.76e-08	2.01e-06	yes	down	_	_	_
c38710_g1	0.04	24.24	7.44	7.78e-08	2.01e-06	yes	up	K13065	E2.3.1.133, HCT	path:ko00940;path:ko00941;path:ko00945;path:ko01100;path:ko01110
c80634_g1	2.37	0.21	-2.98	7.79e-08	2.01e-06	yes	down	_	_	_
c52837_g1	4.11	0.2	-3.82	7.87e-08	2.03e-06	yes	down	K09285	OVM, ANT	_
c69703_g1	20.34	0.87	-4.4	7.96e-08	2.05e-06	yes	down	_	_	_
c71206_g1	13.87	2.8	-2.27	7.98e-08	2.06e-06	yes	down	K03327	TC.MATE, SLC47A, norM, mdtK, dinF	_
c102766_g1	1.86	0	-4.29	8.02e-08	2.07e-06	yes	down	_	_	_
c52408_g1	0.03	1.6	3.68	8.07e-08	2.08e-06	yes	up	_	_	_
c70075_g1	9.84	0.69	-3.65	8.1e-08	2.08e-06	yes	down	_	_	_
c12953_g1	0.07	2.58	3.98	8.11e-08	2.08e-06	yes	up	_	_	_
c67897_g1	0.03	4.97	5.27	8.32e-08	2.14e-06	yes	up	_	_	_
c50364_g1	6.13	0.03	-5.53	8.42e-08	2.16e-06	yes	down	_	_	_
c68614_g1	4.25	24.63	2.51	8.47e-08	2.17e-06	yes	up	_	_	_
c15713_g1	0.43	16.02	4.93	8.51e-08	2.18e-06	yes	up	K15402	CYP86B1	path:ko00073
c62455_g1	0.05	2.86	4.3	8.57e-08	2.2e-06	yes	up	K00750	GYG1, GYG2	_
c48464_g1	0	28.66	8.17	8.63e-08	2.21e-06	yes	up	_	_	_
c67490_g2	0.01	27.06	7.91	8.71e-08	2.23e-06	yes	up	K05658	ABCB1	path:ko02010;path:ko04976;path:ko05206
c16404_g1	1.69	0.04	-3.72	8.84e-08	2.26e-06	yes	down	_	_	_
c40717_g1	3.99	0.13	-4.15	8.88e-08	2.27e-06	yes	down	_	_	_
c66784_g1	40.87	205.99	2.33	9.08e-08	2.32e-06	yes	up	K16871	POP2	path:ko00250;path:ko00650;path:ko01100
c68354_g1	1.08	0	-3.56	9.11e-08	2.32e-06	yes	down	K03549	kup	_
c66928_g4	71.94	391.33	2.44	9.14e-08	2.33e-06	yes	up	K00128	E1.2.1.3	path:ko00010;path:ko00040;path:ko00053;path:ko00071;path:ko00280;path:ko00310;path:ko00330;path:ko00340;path:ko00380;path:ko00410;path:ko00561;path:ko00620;path:ko00625;path:ko00903;path:ko01100;path:ko01110;path:ko01120;path:ko01130
c17495_g1	9.36	0.51	-3.96	9.46e-08	2.41e-06	yes	down	K06966	K06966	_
c50372_g1	1	0.04	-3.02	9.51e-08	2.42e-06	yes	down	_	_	_
c60885_g1	5.85	0.87	-2.62	9.58e-08	2.44e-06	yes	down	K13065	E2.3.1.133, HCT	path:ko00940;path:ko00941;path:ko00945;path:ko01100;path:ko01110
c60739_g1	1.48	0	-3.98	9.59e-08	2.44e-06	yes	down	_	_	_
c52536_g1	0.09	3.32	4.14	9.6e-08	2.44e-06	yes	up	_	_	_
c49538_g1	1.68	0	-4.15	9.6e-08	2.44e-06	yes	down	_	_	_
c64488_g1	1.48	0.04	-3.48	9.61e-08	2.44e-06	yes	down	_	_	_
c69658_g3	1.32	9.5	2.76	9.72e-08	2.46e-06	yes	up	_	_	_
c51985_g1	7.54	0.78	-3.11	9.74e-08	2.47e-06	yes	down	_	_	_
c15608_g1	14.25	0.46	-4.67	9.75e-08	2.47e-06	yes	down	_	_	_
c56243_g1	1.26	16.49	3.6	9.75e-08	2.47e-06	yes	up	_	_	_
c103410_g1	20.09	1.57	-3.59	9.78e-08	2.47e-06	yes	down	_	_	_
c69032_g3	6.54	0.33	-3.95	9.83e-08	2.48e-06	yes	down	K05666	ABCC2	path:ko02010;path:ko04976
c59473_g4	4.55	0.06	-4.83	9.91e-08	2.5e-06	yes	down	_	_	_
c69313_g1	10.06	0.67	-3.72	9.93e-08	2.51e-06	yes	down	_	_	_
c65276_g1	44.3	220.58	2.31	9.94e-08	2.51e-06	yes	up	K00895	E2.7.1.90, pfk	path:ko00051
c68387_g1	0.01	0.88	3.18	1e-07	2.53e-06	yes	up	_	_	_
c70074_g6	3.13	0.2	-3.41	1.02e-07	2.57e-06	yes	down	K14689	SLC30A2, ZNT2	_
c94010_g1	82.07	19.11	-2.1	1.03e-07	2.58e-06	yes	down	_	_	_
c94137_g1	2.06	0.02	-4.13	1.03e-07	2.59e-06	yes	down	_	_	_
c51786_g1	0.54	6.88	3.44	1.03e-07	2.59e-06	yes	up	K09422	MYBP	_
c53671_g1	11	1.22	-3.07	1.05e-07	2.64e-06	yes	down	_	_	_
c69690_g1	0.28	174.26	8.85	1.06e-07	2.65e-06	yes	up	_	_	_
c39637_g1	8	1.4	-2.43	1.08e-07	2.71e-06	yes	down	_	_	_
c67945_g2	11.18	53.93	2.26	1.09e-07	2.73e-06	yes	up	_	_	_
c54023_g1	0.02	0.76	2.8	1.1e-07	2.75e-06	yes	up	_	_	_
c49928_g1	12.45	0.46	-4.49	1.12e-07	2.79e-06	yes	down	_	_	_
c66593_g2	0.18	2.41	3.16	1.12e-07	2.8e-06	yes	up	_	_	_
c62057_g1	4.95	29.26	2.54	1.12e-07	2.81e-06	yes	up	_	_	_
c65498_g1	9.8	0.83	-3.41	1.13e-07	2.83e-06	yes	down	_	_	_
c40994_g1	1.1	0.02	-3.37	1.14e-07	2.85e-06	yes	down	_	_	_
c69951_g2	11.26	250.45	4.46	1.14e-07	2.85e-06	yes	up	_	_	_
c69780_g1	0.33	8.27	4.3	1.14e-07	2.85e-06	yes	up	_	_	_
c71571_g1	2.46	24.41	3.26	1.15e-07	2.85e-06	yes	up	_	_	_
c67387_g2	0.06	2.44	4	1.15e-07	2.86e-06	yes	up	_	_	_
c65168_g2	2.93	0.18	-3.43	1.15e-07	2.86e-06	yes	down	_	_	_
c62184_g2	5.06	0.07	-4.96	1.15e-07	2.86e-06	yes	down	K09873	TIP	_
c58496_g2	0	3.92	5.33	1.15e-07	2.86e-06	yes	up	_	_	_
c68968_g3	1.02	0	-3.48	1.16e-07	2.87e-06	yes	down	K04733	IRAK4	path:ko04064;path:ko04620;path:ko04722;path:ko05133;path:ko05140;path:ko05142;path:ko05145;path:ko05152;path:ko05162;path:ko05164
c65168_g1	2.02	0.19	-2.88	1.17e-07	2.9e-06	yes	down	_	_	_
c58312_g5	2.16	0	-4.5	1.19e-07	2.95e-06	yes	down	_	_	_
c43709_g1	0	17.69	7.48	1.21e-07	2.99e-06	yes	up	_	_	_
c70895_g1	9.29	82.93	3.15	1.21e-07	2.99e-06	yes	up	_	_	_
c67944_g3	43.08	11.57	-1.89	1.21e-07	3e-06	yes	down	_	_	_
c69107_g1	13.06	0	-7.04	1.22e-07	3.02e-06	yes	down	_	_	_
c65334_g1	5.65	0.56	-3.13	1.24e-07	3.05e-06	yes	down	_	_	_
c62892_g3	9.27	1	-3.09	1.24e-07	3.06e-06	yes	down	_	_	_
c50281_g2	4.44	0.5	-2.91	1.25e-07	3.07e-06	yes	down	_	_	_
c66148_g1	7.14	221.11	4.93	1.25e-07	3.08e-06	yes	up	K01369	LGMN	path:ko04142;path:ko04612
c63905_g3	1.81	0.04	-3.78	1.26e-07	3.1e-06	yes	down	K09422	MYBP	_
c56610_g1	2424.81	662.14	-1.87	1.27e-07	3.12e-06	yes	down	_	_	_
c67023_g1	9.43	0.41	-4.21	1.27e-07	3.13e-06	yes	down	_	_	_
c67954_g2	0.12	5.36	4.62	1.28e-07	3.15e-06	yes	up	K11314	TADA2A, ADA2	_
c70208_g2	0.02	21.83	7.55	1.29e-07	3.16e-06	yes	up	_	_	_
c63727_g1	28.76	4.82	-2.55	1.29e-07	3.18e-06	yes	down	K00799	GST, gst	path:ko00480;path:ko00980;path:ko00982;path:ko05204
c12472_g1	2.73	0.08	-3.99	1.31e-07	3.2e-06	yes	down	_	_	_
c66337_g1	40.17	2.16	-4.15	1.31e-07	3.21e-06	yes	down	_	_	_
c61352_g1	1.62	0.1	-3.09	1.31e-07	3.22e-06	yes	down	K00430	E1.11.1.7	path:ko00940;path:ko01100;path:ko01110
c36256_g2	0	2.46	4.68	1.32e-07	3.24e-06	yes	up	K14379	ACP5	path:ko04142;path:ko04380;path:ko05323
c76214_g1	5.78	0	-5.88	1.33e-07	3.25e-06	yes	down	K03676	grxC, GLRX, GLRX2	_
c68600_g3	9	0.81	-3.33	1.33e-07	3.25e-06	yes	down	_	_	_
c54591_g1	9.86	1.73	-2.45	1.34e-07	3.26e-06	yes	down	K16189	PIF4	path:ko04075
c51235_g1	10.2	0.75	-3.59	1.34e-07	3.27e-06	yes	down	_	_	_
c64120_g1	1.32	8.83	2.65	1.34e-07	3.27e-06	yes	up	_	_	_
c68992_g1	21.45	895.98	5.38	1.36e-07	3.32e-06	yes	up	_	_	_
c71829_g3	10.24	1.26	-2.93	1.36e-07	3.32e-06	yes	down	_	_	_
c62050_g1	3.53	97.32	4.74	1.37e-07	3.34e-06	yes	up	K15397	KCS	path:ko00062;path:ko01110
c38881_g1	1.11	0.03	-3.19	1.4e-07	3.4e-06	yes	down	K02183	CALM	path:ko04014;path:ko04015;path:ko04020;path:ko04022;path:ko04024;path:ko04070;path:ko04114;path:ko04261;path:ko04270;path:ko04626;path:ko04713;path:ko04720;path:ko04722;path:ko04728;path:ko04740;path:ko04744;path:ko04745;path:ko04750;path:ko04910;path:ko04912;path:ko04915;path:ko04916;path:ko04921;path:ko04922;path:ko04924;path:ko04925;path:ko04970;path:ko04971;path:ko05010;path:ko05031;path:ko05…
c65105_g1	8.9	1.6	-2.41	1.4e-07	3.41e-06	yes	down	_	_	_
c28734_g1	9.21	2.09	-2.09	1.4e-07	3.41e-06	yes	down	_	_	_
c68735_g2	103.44	2531.01	4.61	1.41e-07	3.42e-06	yes	up	_	_	_
c57960_g2	2.6	0	-4.76	1.41e-07	3.42e-06	yes	down	_	_	_
c69832_g1	3.58	0.39	-2.91	1.42e-07	3.43e-06	yes	down	_	_	_
c65292_g1	0.59	19.33	4.82	1.42e-07	3.44e-06	yes	up	K09422	MYBP	_
c58853_g1	2.23	0	-4.54	1.42e-07	3.44e-06	yes	down	_	_	_
c61110_g1	21.26	124.73	2.55	1.42e-07	3.44e-06	yes	up	K01850	E5.4.99.5	path:ko00400;path:ko01100;path:ko01110;path:ko01130;path:ko01230
c61711_g2	23.56	6.2	-1.91	1.43e-07	3.46e-06	yes	down	_	_	_
c109940_g1	6.57	0.67	-3.12	1.44e-07	3.48e-06	yes	down	K08901	psbQ	path:ko00195;path:ko01100
c70519_g1	2.46	0.03	-4.27	1.44e-07	3.49e-06	yes	down	K00962	pnp, PNPT1	path:ko00230;path:ko00240;path:ko03018
c4401_g1	5.99	113.37	4.22	1.45e-07	3.5e-06	yes	up	_	_	_
c51163_g1	0.81	6.28	2.81	1.45e-07	3.51e-06	yes	up	_	_	_
c59554_g1	4.36	0.6	-2.67	1.47e-07	3.55e-06	yes	down	_	_	_
c66217_g1	4.91	0.18	-4.18	1.48e-07	3.56e-06	yes	down	K01535	E3.6.3.6	path:ko00190
c41008_g1	390.26	58.12	-2.75	1.48e-07	3.57e-06	yes	down	_	_	_
c61288_g1	7.58	0.29	-4.3	1.49e-07	3.59e-06	yes	down	_	_	_
c70849_g3	2.71	82.62	4.88	1.51e-07	3.63e-06	yes	up	K09680	coaW	path:ko00770;path:ko01100
c48995_g2	3.03	0.13	-3.77	1.54e-07	3.69e-06	yes	down	_	_	_
c70939_g3	0.43	3.06	2.58	1.54e-07	3.69e-06	yes	up	K06611	E2.4.1.67	path:ko00052
c101303_g1	2.23	0	-4.54	1.55e-07	3.72e-06	yes	down	_	_	_
c53327_g1	7.17	0	-6.18	1.55e-07	3.72e-06	yes	down	_	_	_
c61151_g1	2.21	0.04	-4.08	1.57e-07	3.75e-06	yes	down	_	_	_
c58269_g1	1.67	18.98	3.43	1.57e-07	3.76e-06	yes	up	K08235	E2.4.1.207	_
c61319_g2	227.78	56.47	-2.01	1.58e-07	3.79e-06	yes	down	K00789	metK	path:ko00270;path:ko01100;path:ko01110;path:ko01230
c67199_g1	0.45	5.64	3.37	1.59e-07	3.79e-06	yes	up	_	_	_
c55565_g2	2.3	149.43	5.96	1.6e-07	3.83e-06	yes	up	K10775	E4.3.1.24	path:ko00360;path:ko00940;path:ko01100;path:ko01110
c70532_g3	5.02	0.27	-3.79	1.61e-07	3.84e-06	yes	down	_	_	_
c42171_g1	5.79	0.08	-5.01	1.61e-07	3.84e-06	yes	down	_	_	_
c70669_g1	0.92	0	-3.35	1.61e-07	3.84e-06	yes	down	_	_	_
c50676_g1	43.92	588.18	3.74	1.63e-07	3.89e-06	yes	up	_	_	_
c63213_g1	3.03	0.03	-4.61	1.65e-07	3.94e-06	yes	down	_	_	_
c64618_g1	9.36	193.49	4.35	1.66e-07	3.94e-06	yes	up	K03644	lipA	path:ko00785;path:ko01100
c39068_g1	12.73	2.26	-2.44	1.67e-07	3.97e-06	yes	down	_	_	_
c58539_g1	0.04	5.07	5.19	1.68e-07	3.99e-06	yes	up	_	_	_
c70597_g1	0.82	29.51	5.01	1.68e-07	3.99e-06	yes	up	K13356	FAR	path:ko00073;path:ko04146;path:ko04212
c71634_g5	3.49	0.2	-3.56	1.7e-07	4.04e-06	yes	down	_	_	_
c47355_g1	3.87	207.78	5.71	1.71e-07	4.06e-06	yes	up	K13993	HSP20	path:ko04141
c44388_g1	72.43	365.62	2.33	1.71e-07	4.06e-06	yes	up	_	_	_
c61381_g1	8.7	0.71	-3.45	1.73e-07	4.09e-06	yes	down	K01802	E5.2.1.8	_
c67613_g1	0.19	3.47	3.64	1.74e-07	4.13e-06	yes	up	_	_	_
c48871_g1	11.63	0.74	-3.81	1.75e-07	4.13e-06	yes	down	_	_	_
c71114_g1	3.64	33.44	3.16	1.75e-07	4.13e-06	yes	up	_	_	_
c58569_g2	1.43	18.71	3.62	1.75e-07	4.15e-06	yes	up	K14709	SLC39A1_2_3, ZIP1_2_3	_
c49795_g1	0.55	22.81	5.15	1.76e-07	4.16e-06	yes	up	_	_	_
c58616_g3	2.08	0.04	-3.97	1.77e-07	4.18e-06	yes	down	_	_	_
c70830_g5	0	7.89	6.32	1.77e-07	4.18e-06	yes	up	_	_	_
c55240_g2	6.23	0.57	-3.23	1.78e-07	4.19e-06	yes	down	K15015	SLC32A, VGAT	path:ko04721;path:ko04723;path:ko04727;path:ko05032;path:ko05033
c67788_g1	3.35	0.31	-3.06	1.82e-07	4.29e-06	yes	down	_	_	_
c64838_g1	5.47	0.69	-2.82	1.83e-07	4.3e-06	yes	down	K08867	WNK, PRKWNK	_
c50228_g3	53.79	14.28	-1.91	1.83e-07	4.31e-06	yes	down	_	_	_
c61963_g1	0	1.19	3.69	1.84e-07	4.32e-06	yes	up	_	_	_
c48538_g1	4.9	0.14	-4.36	1.84e-07	4.33e-06	yes	down	_	_	_
c57890_g1	58.45	308.81	2.4	1.84e-07	4.33e-06	yes	up	K01623	ALDO	path:ko00010;path:ko00030;path:ko00051;path:ko00680;path:ko00710;path:ko01100;path:ko01110;path:ko01120;path:ko01130;path:ko01200;path:ko01230
c54118_g1	21.59	104.32	2.27	1.84e-07	4.33e-06	yes	up	K07375	TUBB	path:ko04145;path:ko04540;path:ko05130
c1671_g1	0.08	8.54	5.62	1.86e-07	4.36e-06	yes	up	_	_	_
c49764_g4	6.04	0	-5.94	1.88e-07	4.41e-06	yes	down	_	_	_
c105131_g1	12.91	0.13	-5.85	1.88e-07	4.41e-06	yes	down	_	_	_
c69512_g1	5.63	0.98	-2.41	1.89e-07	4.43e-06	yes	down	_	_	_
c37936_g1	0.74	170.87	7.67	1.9e-07	4.44e-06	yes	up	_	_	_
c58502_g5	7.87	0.81	-3.13	1.91e-07	4.46e-06	yes	down	_	_	_
c52692_g1	5.16	0.21	-4.08	1.91e-07	4.47e-06	yes	down	_	_	_
c57157_g1	24.71	130.47	2.4	1.94e-07	4.52e-06	yes	up	K01962	accA	path:ko00061;path:ko00253;path:ko00620;path:ko00640;path:ko00720;path:ko01100;path:ko01110;path:ko01120;path:ko01130;path:ko01200;path:ko01212
c43475_g1	0.6	0	-2.82	1.94e-07	4.53e-06	yes	down	K12640	CYP85A2, BR6OX2	path:ko00905;path:ko01100;path:ko01110
c63816_g1	0.69	0.03	-2.57	1.94e-07	4.54e-06	yes	down	_	_	_
c17429_g1	13	0.85	-3.78	1.99e-07	4.64e-06	yes	down	K14487	GH3	path:ko04075
c81163_g1	0	3.68	5.24	2e-07	4.66e-06	yes	up	_	_	_
c61141_g1	1.59	0	-4.07	2.01e-07	4.67e-06	yes	down	K14638	SLC15A3_4, PHT	_
c24634_g1	1.88	0.14	-3.07	2.03e-07	4.73e-06	yes	down	_	_	_
c28275_g1	13.61	0.21	-5.46	2.05e-07	4.77e-06	yes	down	K13680	CSLA	_
c70373_g1	0.11	1.85	3.22	2.07e-07	4.82e-06	yes	up	_	_	_
c66373_g1	2.38	84.1	5.09	2.07e-07	4.82e-06	yes	up	K10999	CESA	_
c25351_g1	0.25	33.16	6.58	2.09e-07	4.85e-06	yes	up	_	_	_
c45927_g1	0.27	6.23	4.1	2.1e-07	4.86e-06	yes	up	_	_	_
c68695_g3	11.79	55.29	2.22	2.11e-07	4.89e-06	yes	up	_	_	_
c51033_g2	5.03	0.19	-4.15	2.12e-07	4.91e-06	yes	down	_	_	_
c70082_g1	2.38	0.37	-2.4	2.13e-07	4.92e-06	yes	down	K14689	SLC30A2, ZNT2	_
c2147_g1	1.78	0	-4.23	2.13e-07	4.92e-06	yes	down	_	_	_
c60613_g1	39.81	10.52	-1.91	2.13e-07	4.93e-06	yes	down	_	_	_
c94523_g1	8.46	0.23	-4.68	2.13e-07	4.93e-06	yes	down	K14638	SLC15A3_4, PHT	_
c27388_g1	1.47	40.75	4.7	2.13e-07	4.93e-06	yes	up	_	_	_
c102367_g1	7.31	39.99	2.44	2.14e-07	4.94e-06	yes	up	_	_	_
c60813_g1	1.33	8.3	2.55	2.14e-07	4.94e-06	yes	up	_	_	_
c57289_g2	30.45	144.63	2.24	2.18e-07	5.02e-06	yes	up	_	_	_
c67975_g1	1.02	0.02	-3.23	2.18e-07	5.02e-06	yes	down	_	_	_
c67605_g1	6.73	1	-2.63	2.19e-07	5.04e-06	yes	down	_	_	_
c57601_g2	7.66	1.02	-2.79	2.22e-07	5.1e-06	yes	down	_	_	_
c88796_g1	1.95	0.14	-3.11	2.25e-07	5.18e-06	yes	down	K15078	SLX1	path:ko03460
c50932_g2	289.35	5.65	-5.65	2.26e-07	5.18e-06	yes	down	K08913	LHCB2	path:ko00196;path:ko01100
c60247_g2	1.85	0.11	-3.2	2.26e-07	5.18e-06	yes	down	K13508	GPAT	path:ko00561;path:ko00564;path:ko01100;path:ko01110
c61571_g1	9.94	0.53	-3.99	2.26e-07	5.18e-06	yes	down	K10529	DOX1	path:ko00592
c56239_g1	18.65	1.29	-3.76	2.26e-07	5.19e-06	yes	down	K15718	LOX1_5	path:ko00591
c59759_g1	6.62	0.54	-3.39	2.27e-07	5.19e-06	yes	down	_	_	_
c109933_g1	1.82	0	-4.27	2.27e-07	5.19e-06	yes	down	_	_	_
c69394_g1	1.32	0	-3.83	2.27e-07	5.19e-06	yes	down	_	_	_
c54829_g1	1.42	0.08	-3.09	2.3e-07	5.27e-06	yes	down	_	_	_
c57214_g1	3.37	0.17	-3.7	2.31e-07	5.29e-06	yes	down	_	_	_
c34574_g1	15.85	0	-7.32	2.34e-07	5.36e-06	yes	down	_	_	_
c53256_g1	0.03	32.91	8.01	2.35e-07	5.37e-06	yes	up	_	_	_
c64138_g1	0.9	11.5	3.54	2.36e-07	5.38e-06	yes	up	_	_	_
c44028_g1	2.15	0	-4.49	2.36e-07	5.38e-06	yes	down	_	_	_
c111804_g1	16.5	0	-7.37	2.38e-07	5.43e-06	yes	down	K15404	K15404, CER1	path:ko00073;path:ko01110
c64008_g2	0.18	3.49	3.69	2.39e-07	5.43e-06	yes	up	_	_	_
c48105_g1	4.66	0.53	-2.92	2.39e-07	5.43e-06	yes	down	_	_	_
c65033_g3	25.95	118.83	2.19	2.4e-07	5.45e-06	yes	up	K14611	SLC23A1_2, SVCT1_2	_
c50690_g1	49.17	1.52	-4.92	2.4e-07	5.45e-06	yes	down	_	_	_
c65990_g3	5.94	0.26	-4.07	2.44e-07	5.53e-06	yes	down	K14499	BKI1	path:ko04075
c61142_g1	1.28	0.03	-3.36	2.45e-07	5.56e-06	yes	down	_	_	_
c56273_g2	1.37	18.22	3.64	2.46e-07	5.57e-06	yes	up	_	_	_
c56705_g1	12.93	113.25	3.12	2.48e-07	5.62e-06	yes	up	K08235	E2.4.1.207	_
c66248_g1	3.05	0.1	-3.99	2.48e-07	5.62e-06	yes	down	_	_	_
c62115_g1	21.73	3.84	-2.47	2.51e-07	5.68e-06	yes	down	_	_	_
c71933_g1	0.38	4.22	3.16	2.55e-07	5.76e-06	yes	up	_	_	_
c72021_g1	11.58	2.01	-2.47	2.55e-07	5.76e-06	yes	down	_	_	_
c54601_g1	1.14	15.5	3.65	2.56e-07	5.79e-06	yes	up	_	_	_
c18512_g1	9.02	1.15	-2.86	2.57e-07	5.8e-06	yes	down	_	_	_
c55627_g1	18.28	86.83	2.24	2.6e-07	5.88e-06	yes	up	_	_	_
c64886_g1	31.65	9.07	-1.79	2.6e-07	5.88e-06	yes	down	K15227	TYRAAT	path:ko00400;path:ko01100;path:ko01110;path:ko01230
c66969_g2	63.75	16.59	-1.94	2.61e-07	5.89e-06	yes	down	_	_	_
c68566_g2	40.9	188.25	2.2	2.61e-07	5.89e-06	yes	up	K00844	HK	path:ko00010;path:ko00051;path:ko00052;path:ko00500;path:ko00520;path:ko00521;path:ko00524;path:ko01100;path:ko01110;path:ko01120;path:ko01130;path:ko01200;path:ko04066;path:ko04910;path:ko04930;path:ko04973;path:ko05230
c22514_g1	108.62	25.55	-2.08	2.62e-07	5.9e-06	yes	down	K01728	pel	path:ko00040
c66890_g1	3.04	176.31	5.81	2.63e-07	5.91e-06	yes	up	_	_	_
c47925_g1	0.4	118.14	7.89	2.64e-07	5.93e-06	yes	up	_	_	_
c69967_g1	206.8	34.88	-2.56	2.68e-07	6.03e-06	yes	down	K06617	E2.4.1.82	path:ko00052
c68502_g3	0.38	30.67	6	2.68e-07	6.03e-06	yes	up	_	_	_
c69157_g4	7.21	84.34	3.53	2.71e-07	6.08e-06	yes	up	K13993	HSP20	path:ko04141
c40541_g1	12.07	73.09	2.59	2.74e-07	6.14e-06	yes	up	K01657	trpE	path:ko00400;path:ko01100;path:ko01110;path:ko01130;path:ko01230
c32135_g3	0.09	4.78	4.66	2.8e-07	6.28e-06	yes	up	_	_	_
c61594_g1	3.16	0.2	-3.44	2.8e-07	6.28e-06	yes	down	_	_	_
c46263_g1	0.1	3.08	3.96	2.86e-07	6.41e-06	yes	up	_	_	_
c70763_g3	0.02	3.36	4.9	2.88e-07	6.44e-06	yes	up	_	_	_
c65569_g1	24.38	134.4	2.46	2.89e-07	6.46e-06	yes	up	K05658	ABCB1	path:ko02010;path:ko04976;path:ko05206
c68356_g1	5.26	0.12	-4.59	2.92e-07	6.52e-06	yes	down	_	_	_
c68949_g6	0.27	5.07	3.82	2.95e-07	6.6e-06	yes	up	_	_	_
c50817_g1	0.77	1.89	1.19	3e-07	6.69e-06	yes	up	K16903	TAA1	path:ko00380;path:ko01100
c59216_g1	0.67	0	-2.94	3.02e-07	6.74e-06	yes	down	_	_	_
c70079_g1	31.63	5.28	-2.56	3.1e-07	6.92e-06	yes	down	_	_	_
c16257_g1	44.21	1380.86	4.96	3.11e-07	6.94e-06	yes	up	_	_	_
c87222_g1	7.95	0.71	-3.32	3.11e-07	6.94e-06	yes	down	K09286	EREBP	_
c38221_g2	2.47	0.03	-4.26	3.12e-07	6.94e-06	yes	down	_	_	_
c61220_g1	0.76	0.02	-2.8	3.12e-07	6.94e-06	yes	down	K14638	SLC15A3_4, PHT	_
c61159_g1	7.84	1.39	-2.41	3.12e-07	6.95e-06	yes	down	_	_	_
c52118_g3	3.36	0.13	-3.88	3.14e-07	6.97e-06	yes	down	_	_	_
c22363_g1	3.54	0.23	-3.46	3.15e-07	6.99e-06	yes	down	_	_	_
c66652_g2	7.37	0.52	-3.6	3.17e-07	7.02e-06	yes	down	K03327	TC.MATE, SLC47A, norM, mdtK, dinF	_
c31889_g1	10.28	45.56	2.14	3.17e-07	7.02e-06	yes	up	K01188	E3.2.1.21	path:ko00460;path:ko00500;path:ko00940;path:ko01100;path:ko01110
c38262_g1	0	2.28	4.57	3.17e-07	7.02e-06	yes	up	_	_	_
c38005_g1	52.92	10.03	-2.39	3.18e-07	7.04e-06	yes	down	_	_	_
c64349_g2	0	1.78	4.23	3.19e-07	7.07e-06	yes	up	_	_	_
c65464_g1	0.05	4.17	4.87	3.22e-07	7.13e-06	yes	up	_	_	_
c56577_g1	1.73	0.11	-3.14	3.24e-07	7.18e-06	yes	down	_	_	_
c69004_g1	18.29	4.17	-2.11	3.25e-07	7.19e-06	yes	down	_	_	_
c36853_g1	23.77	1.69	-3.73	3.25e-07	7.19e-06	yes	down	_	_	_
c60603_g1	1.65	0.06	-3.42	3.27e-07	7.22e-06	yes	down	_	_	_
c56412_g1	2.42	0.23	-2.92	3.29e-07	7.25e-06	yes	down	_	_	_
c62660_g3	8.75	0.77	-3.35	3.29e-07	7.26e-06	yes	down	_	_	_
c16407_g1	4.6	0.43	-3.15	3.35e-07	7.38e-06	yes	down	_	_	_
c28855_g1	215.46	2489.6	3.53	3.38e-07	7.44e-06	yes	up	K00008	SORD, gutB	path:ko00040;path:ko00051;path:ko01100
c35473_g1	32.38	1.53	-4.31	3.41e-07	7.5e-06	yes	down	_	_	_
c70758_g1	0.01	5.98	5.77	3.47e-07	7.63e-06	yes	up	K09287	RAV	_
c104265_g1	0.08	6.73	5.25	3.51e-07	7.71e-06	yes	up	K11838	USP7, UBP15	path:ko04068;path:ko05168;path:ko05169;path:ko05203
c62059_g3	8.84	1.15	-2.84	3.52e-07	7.73e-06	yes	down	_	_	_
c54762_g1	3.08	0.06	-4.29	3.55e-07	7.8e-06	yes	down	_	_	_
c48214_g3	0.11	17.71	6.39	3.57e-07	7.82e-06	yes	up	_	_	_
c57637_g2	7.69	1.38	-2.4	3.61e-07	7.91e-06	yes	down	K01227	E3.2.1.96	path:ko00511
c8630_g1	0.02	4.89	5.42	3.64e-07	7.97e-06	yes	up	_	_	_
c67705_g1	12.06	2.66	-2.14	3.64e-07	7.98e-06	yes	down	_	_	_
c65540_g1	13.14	1.82	-2.79	3.67e-07	8.04e-06	yes	down	K01051	E3.1.1.11	path:ko00040;path:ko00500;path:ko01100
c69191_g1	0.07	8.3	5.61	3.68e-07	8.05e-06	yes	up	K12153	CYP79A2	path:ko00460;path:ko00966;path:ko01110;path:ko01210
c61718_g5	2.09	19.13	3.14	3.68e-07	8.05e-06	yes	up	_	_	_
c61107_g1	0.05	2.01	3.81	3.7e-07	8.08e-06	yes	up	K15382	SLC50A, SWEET	_
c65293_g2	0.01	3.22	4.88	3.75e-07	8.19e-06	yes	up	K09422	MYBP	_
c66931_g2	1.74	0.04	-3.7	3.77e-07	8.23e-06	yes	down	_	_	_
c48451_g1	2.04	0.03	-4.09	3.81e-07	8.31e-06	yes	down	_	_	_
c63096_g3	0.01	0.52	2.54	3.82e-07	8.33e-06	yes	up	_	_	_
c69106_g1	1.42	0.02	-3.71	3.83e-07	8.35e-06	yes	down	_	_	_
c38012_g1	4.68	0.2	-3.97	3.86e-07	8.41e-06	yes	down	_	_	_
c101338_g1	26.19	120.51	2.2	3.89e-07	8.47e-06	yes	up	K02160	accB, bccP	path:ko00061;path:ko00253;path:ko00620;path:ko00640;path:ko00720;path:ko01100;path:ko01110;path:ko01120;path:ko01130;path:ko01200;path:ko01212
c70365_g1	2.71	0.27	-2.93	3.9e-07	8.47e-06	yes	down	_	_	_
c56841_g1	0.49	53.87	6.52	3.92e-07	8.5e-06	yes	up	_	_	_
c52346_g2	0.31	9.14	4.5	3.92e-07	8.5e-06	yes	up	_	_	_
c25271_g1	0.16	3.35	3.76	3.97e-07	8.61e-06	yes	up	_	_	_
c48365_g2	3.14	43.28	3.74	3.98e-07	8.64e-06	yes	up	K08242	E2.1.1.143	path:ko00100;path:ko01110
c67946_g2	3.42	0.14	-3.86	4.03e-07	8.73e-06	yes	down	_	_	_
c57784_g3	4.54	0.64	-2.65	4.06e-07	8.8e-06	yes	down	K14664	ILR1	_
c48014_g1	2.92	0	-4.92	4.08e-07	8.83e-06	yes	down	K16281	RHA1	_
c60636_g1	4.22	0.25	-3.64	4.09e-07	8.85e-06	yes	down	_	_	_
c20848_g2	0.03	13.55	6.67	4.1e-07	8.86e-06	yes	up	_	_	_
c49320_g1	85.55	443.16	2.37	4.11e-07	8.88e-06	yes	up	K00161	PDHA, pdhA	path:ko00010;path:ko00020;path:ko00620;path:ko01100;path:ko01110;path:ko01120;path:ko01130;path:ko01200;path:ko04066;path:ko04922;path:ko05230
c8513_g1	7.06	108.7	3.93	4.17e-07	9.01e-06	yes	up	_	_	_
c47314_g2	4.73	43.23	3.17	4.18e-07	9.02e-06	yes	up	K13379	RGP, UTM	path:ko00520
c69141_g1	22.29	288.81	3.69	4.18e-07	9.02e-06	yes	up	K17757	CARKD	_
c66652_g1	11.05	1.71	-2.62	4.19e-07	9.03e-06	yes	down	K03327	TC.MATE, SLC47A, norM, mdtK, dinF	_
c74717_g1	0.03	0.89	2.92	4.19e-07	9.03e-06	yes	up	_	_	_
c58423_g1	6.3	0.12	-4.87	4.19e-07	9.03e-06	yes	down	_	_	_
c70281_g1	6.45	1.13	-2.41	4.23e-07	9.12e-06	yes	down	_	_	_
c53170_g2	0.03	9.53	6.27	4.24e-07	9.12e-06	yes	up	_	_	_
c48654_g1	6.2	0.41	-3.61	4.24e-07	9.12e-06	yes	down	_	_	_
c70251_g2	92.18	13.12	-2.8	4.24e-07	9.12e-06	yes	down	_	_	_
c47399_g1	1.05	0	-3.52	4.28e-07	9.18e-06	yes	down	K09519	DNAJB13	_
c58308_g1	5.09	0.2	-4.14	4.28e-07	9.19e-06	yes	down	_	_	_
c69070_g9	12.7	0.87	-3.73	4.3e-07	9.23e-06	yes	down	_	_	_
c70616_g3	53.86	231.4	2.1	4.33e-07	9.27e-06	yes	up	_	_	_
c46484_g1	4.11	0.12	-4.24	4.39e-07	9.4e-06	yes	down	_	_	_
c49722_g1	6.17	64.52	3.37	4.41e-07	9.43e-06	yes	up	_	_	_
c70581_g1	1.75	7.84	2.1	4.42e-07	9.47e-06	yes	up	K18416	THEX1, ERI1	_
c60607_g1	11.05	1.98	-2.42	4.43e-07	9.49e-06	yes	down	K00430	E1.11.1.7	path:ko00940;path:ko01100;path:ko01110
c60470_g1	4.33	0.16	-4.09	4.45e-07	9.5e-06	yes	down	_	_	_
c62090_g1	20.21	94.92	2.23	4.48e-07	9.57e-06	yes	up	K14664	ILR1	_
c61758_g1	0.78	9.43	3.43	4.53e-07	9.68e-06	yes	up	_	_	_
c88470_g1	1.12	19.73	4.03	4.56e-07	9.74e-06	yes	up	_	_	_
c39520_g1	3.29	0.24	-3.32	4.58e-07	9.77e-06	yes	down	_	_	_
c24664_g1	0.04	7.92	5.86	4.68e-07	9.97e-06	yes	up	_	_	_
c109571_g1	0.01	0.61	2.74	4.69e-07	1e-05	yes	up	_	_	_
c53739_g2	0	5.07	5.69	4.72e-07	1e-05	yes	up	_	_	_
c81229_g1	0	3.09	5	4.76e-07	1.01e-05	yes	up	_	_	_
c55010_g2	0	5.29	5.75	4.77e-07	1.01e-05	yes	up	_	_	_
c26003_g1	5.63	0.4	-3.51	4.77e-07	1.01e-05	yes	down	_	_	_
c101388_g1	0.48	0	-2.54	4.78e-07	1.02e-05	yes	down	_	_	_
c69035_g1	29.37	204.92	2.8	4.79e-07	1.02e-05	yes	up	K17761	SSADH	path:ko00250;path:ko00650;path:ko01100
c71004_g1	6.01	42.02	2.79	4.9e-07	1.04e-05	yes	up	_	_	_
c57007_g1	4.83	0.27	-3.73	4.96e-07	1.05e-05	yes	down	_	_	_
c59780_g1	2.64	0.07	-4.04	4.97e-07	1.05e-05	yes	down	_	_	_
c57152_g2	1.04	52.93	5.53	4.99e-07	1.06e-05	yes	up	_	_	_
c52388_g1	677.56	136.7	-2.31	5.02e-07	1.06e-05	yes	down	_	_	_
c65140_g3	0.03	7.76	5.96	5.08e-07	1.07e-05	yes	up	_	_	_
c64140_g1	0.9	0	-3.33	5.09e-07	1.08e-05	yes	down	_	_	_
c58856_g1	2.11	0	-4.47	5.1e-07	1.08e-05	yes	down	_	_	_
c70805_g1	9.51	231.13	4.59	5.12e-07	1.08e-05	yes	up	K19355	MAN	path:ko00051
c50673_g1	3.88	0.37	-3.08	5.13e-07	1.08e-05	yes	down	_	_	_
c69297_g1	22.01	6.06	-1.84	5.25e-07	1.11e-05	yes	down	K16296	SCPL-I	_
c67569_g2	4.59	0.48	-3.01	5.3e-07	1.12e-05	yes	down	_	_	_
c88150_g1	2.29	37.83	3.99	5.34e-07	1.13e-05	yes	up	_	_	_
c23068_g1	6.44	37.62	2.53	5.35e-07	1.13e-05	yes	up	_	_	_
c52996_g1	2.48	0.04	-4.23	5.36e-07	1.13e-05	yes	down	_	_	_
c68859_g1	16.06	3.16	-2.31	5.41e-07	1.14e-05	yes	down	_	_	_
c57066_g2	11.01	51.52	2.22	5.5e-07	1.16e-05	yes	up	K11517	HAO	path:ko00630;path:ko01100;path:ko01110;path:ko01120;path:ko01130;path:ko01200;path:ko04146
c48576_g1	0.21	138.03	8.81	5.57e-07	1.17e-05	yes	up	_	_	_
c47176_g1	14.2	2.52	-2.45	5.64e-07	1.18e-05	yes	down	_	_	_
c65617_g2	4.58	0.07	-4.79	5.66e-07	1.19e-05	yes	down	_	_	_
c5467_g1	2.71	0.08	-3.96	5.68e-07	1.19e-05	yes	down	K09422	MYBP	_
c50763_g1	7.87	65.36	3.04	5.74e-07	1.2e-05	yes	up	_	_	_
c66994_g3	14.19	1.97	-2.79	5.74e-07	1.2e-05	yes	down	_	_	_
c68638_g1	0.39	9.83	4.33	5.74e-07	1.2e-05	yes	up	_	_	_
c65259_g1	0.03	1.41	3.59	5.75e-07	1.2e-05	yes	up	_	_	_
c54278_g1	1.31	0	-3.81	5.76e-07	1.2e-05	yes	down	_	_	_
c64835_g2	33.87	191.04	2.49	5.78e-07	1.21e-05	yes	up	K09458	fabF	path:ko00061;path:ko00780;path:ko01100;path:ko01212
c63054_g1	0	1.29	3.8	5.79e-07	1.21e-05	yes	up	_	_	_
c62824_g2	4.57	0	-5.55	5.8e-07	1.21e-05	yes	down	_	_	_
c65804_g1	1.26	0.02	-3.51	5.84e-07	1.22e-05	yes	down	_	_	_
c68424_g1	9.61	2.62	-1.83	5.85e-07	1.22e-05	yes	down	K11430	EZH2	path:ko05206
c67612_g1	0.03	7.38	5.84	5.87e-07	1.22e-05	yes	up	_	_	_
c66575_g2	8.04	2.86	-1.46	5.89e-07	1.23e-05	yes	down	_	_	_
c54763_g1	1.1	0	-3.58	5.96e-07	1.24e-05	yes	down	_	_	_
c101382_g1	3.11	100.35	4.97	5.99e-07	1.25e-05	yes	up	_	_	_
c66537_g2	34.32	225.41	2.71	6e-07	1.25e-05	yes	up	K15979	SND1	path:ko05169;path:ko05203
c53282_g1	0.11	2.76	3.78	6.02e-07	1.25e-05	yes	up	_	_	_
c62253_g1	0.09	6.26	5.08	6.03e-07	1.25e-05	yes	up	_	_	_
c54350_g1	6.09	1017.99	7.36	6.04e-07	1.25e-05	yes	up	_	_	_
c67881_g5	0	8.85	6.48	6.09e-07	1.26e-05	yes	up	_	_	_
c66684_g3	5.51	38.98	2.8	6.22e-07	1.29e-05	yes	up	K05359	ADT, PDT	path:ko00400;path:ko01100;path:ko01110;path:ko01130;path:ko01230
c38831_g1	0.29	81.98	7.71	6.26e-07	1.3e-05	yes	up	_	_	_
c68486_g1	1.17	0.04	-3.21	6.29e-07	1.3e-05	yes	down	_	_	_
c52583_g1	0.01	9.42	6.46	6.31e-07	1.31e-05	yes	up	_	_	_
c67084_g2	2.98	30.99	3.34	6.33e-07	1.31e-05	yes	up	_	_	_
c52066_g1	3.57	0.19	-3.66	6.33e-07	1.31e-05	yes	down	_	_	_
c24270_g1	0.02	2.26	4.32	6.35e-07	1.31e-05	yes	up	_	_	_
c64959_g1	1.57	17.99	3.43	6.38e-07	1.32e-05	yes	up	_	_	_
c61778_g2	11.15	2.08	-2.37	6.45e-07	1.33e-05	yes	down	_	_	_
c36783_g1	55.1	16.04	-1.77	6.46e-07	1.33e-05	yes	down	K06630	YWHAE	path:ko04011;path:ko04110;path:ko04114;path:ko04151;path:ko04390;path:ko04391;path:ko04722;path:ko05169;path:ko05203
c67506_g1	16.58	77.04	2.21	6.46e-07	1.33e-05	yes	up	_	_	_
c62061_g1	0.83	0.01	-3.02	6.48e-07	1.34e-05	yes	down	K14457	MOGAT2, MGAT2	path:ko00561;path:ko04975
c63189_g1	69.2	18.41	-1.9	6.5e-07	1.34e-05	yes	down	K05391	CNGF	path:ko04626
c60625_g1	5.35	0.51	-3.15	6.5e-07	1.34e-05	yes	down	_	_	_
c60664_g1	0.02	8.76	6.22	6.56e-07	1.35e-05	yes	up	_	_	_
c16490_g1	31.64	1.81	-4.06	6.57e-07	1.35e-05	yes	down	K09338	HD-ZIP	_
c70870_g3	2.59	0.08	-3.92	6.58e-07	1.35e-05	yes	down	_	_	_
c62054_g1	8.27	155.41	4.22	6.71e-07	1.38e-05	yes	up	K01674	cah	path:ko00910
c59447_g1	0.11	2.11	3.43	6.74e-07	1.38e-05	yes	up	_	_	_
c68789_g1	9.82	1.64	-2.51	6.79e-07	1.39e-05	yes	down	_	_	_
c44084_g1	1.82	0.03	-3.9	6.85e-07	1.4e-05	yes	down	_	_	_
c53273_g2	0.3	0	-1.99	6.89e-07	1.41e-05	yes	down	_	_	_
c52434_g2	8.08	53.13	2.7	6.97e-07	1.43e-05	yes	up	K15283	SLC35E1	_
c48214_g1	2.06	86.3	5.32	7e-07	1.43e-05	yes	up	_	_	_
c70904_g2	0.56	23.69	5.18	7e-07	1.43e-05	yes	up	_	_	_
c63561_g5	0	3.67	5.24	7.01e-07	1.43e-05	yes	up	_	_	_
c101469_g1	16.3	75.59	2.21	7.03e-07	1.44e-05	yes	up	K17725	ETHE1	path:ko00920
c8650_g1	29.74	5.06	-2.53	7.04e-07	1.44e-05	yes	down	_	_	_
c56758_g2	0.17	4.75	4.16	7.05e-07	1.44e-05	yes	up	_	_	_
c56563_g1	1.28	0.02	-3.52	7.09e-07	1.45e-05	yes	down	_	_	_
c51024_g1	0.1	2.05	3.45	7.1e-07	1.45e-05	yes	up	_	_	_
c35242_g1	2.75	0.06	-4.17	7.11e-07	1.45e-05	yes	down	_	_	_
c68692_g1	1.8	0.15	-2.92	7.12e-07	1.45e-05	yes	down	_	_	_
c46890_g1	1.01	0.07	-2.69	7.14e-07	1.45e-05	yes	down	_	_	_
c45979_g2	318.43	1765.33	2.47	7.16e-07	1.46e-05	yes	up	K00134	GAPDH, gapA	path:ko00010;path:ko00710;path:ko01100;path:ko01110;path:ko01120;path:ko01130;path:ko01200;path:ko01230;path:ko04066;path:ko05010
c55681_g2	0	2.88	4.9	7.17e-07	1.46e-05	yes	up	_	_	_
c67133_g1	14.4	74.22	2.36	7.22e-07	1.47e-05	yes	up	_	_	_
c48612_g1	0.4	10.75	4.44	7.32e-07	1.49e-05	yes	up	_	_	_
c33505_g1	3.89	0.05	-4.78	7.42e-07	1.51e-05	yes	down	_	_	_
c111633_g1	4.55	0.15	-4.2	7.46e-07	1.51e-05	yes	down	_	_	_
c65591_g1	11.78	58.59	2.3	7.46e-07	1.51e-05	yes	up	_	_	_
c41767_g1	0	2.84	4.88	7.46e-07	1.51e-05	yes	up	K07192	FLOT	path:ko04910
c81491_g1	2.26	0.1	-3.56	7.47e-07	1.51e-05	yes	down	K17279	REEP5_6	_
c57291_g1	0.21	5.98	4.29	7.49e-07	1.52e-05	yes	up	_	_	_
c59400_g1	3.76	0.48	-2.74	7.52e-07	1.52e-05	yes	down	_	_	_
c70968_g2	0.69	18.56	4.56	7.52e-07	1.52e-05	yes	up	K10999	CESA	_
c45288_g1	0.09	22.05	6.88	7.55e-07	1.53e-05	yes	up	_	_	_
c66733_g2	22.39	4.65	-2.24	7.58e-07	1.53e-05	yes	down	_	_	_
c61916_g1	10.5	2.02	-2.32	7.59e-07	1.53e-05	yes	down	K03327	TC.MATE, SLC47A, norM, mdtK, dinF	_
c38814_g1	90.95	12.58	-2.84	7.66e-07	1.55e-05	yes	down	_	_	_
c55907_g1	4.1	0.09	-4.43	7.67e-07	1.55e-05	yes	down	K02183	CALM	path:ko04014;path:ko04015;path:ko04020;path:ko04022;path:ko04024;path:ko04070;path:ko04114;path:ko04261;path:ko04270;path:ko04626;path:ko04713;path:ko04720;path:ko04722;path:ko04728;path:ko04740;path:ko04744;path:ko04745;path:ko04750;path:ko04910;path:ko04912;path:ko04915;path:ko04916;path:ko04921;path:ko04922;path:ko04924;path:ko04925;path:ko04970;path:ko04971;path:ko05010;path:ko05031;path:ko05…
c66425_g3	0	18.01	7.5	7.71e-07	1.55e-05	yes	up	_	_	_
c27041_g1	4.26	0.17	-4.03	7.78e-07	1.57e-05	yes	down	_	_	_
c40827_g1	0.2	7.79	4.72	7.81e-07	1.57e-05	yes	up	_	_	_
c71589_g6	5.38	20.34	1.9	7.89e-07	1.59e-05	yes	up	K11968	ARIH1	_
c47613_g1	3.03	0.15	-3.65	7.9e-07	1.59e-05	yes	down	_	_	_
c71398_g4	0.01	3.48	5.05	7.97e-07	1.6e-05	yes	up	_	_	_
c69060_g1	0.12	5.07	4.56	7.99e-07	1.6e-05	yes	up	_	_	_
c67454_g1	29.48	6.9	-2.08	8.08e-07	1.62e-05	yes	down	_	_	_
c64944_g3	1.09	0.06	-2.92	8.09e-07	1.62e-05	yes	down	_	_	_
c63852_g2	0	7.22	6.19	8.09e-07	1.62e-05	yes	up	K07437	CYP26A	path:ko00830;path:ko01100
c63663_g1	11.9	65.95	2.46	8.13e-07	1.63e-05	yes	up	_	_	_
c40267_g1	29.69	302.27	3.34	8.14e-07	1.63e-05	yes	up	_	_	_
c45834_g1	0.01	4.97	5.54	8.17e-07	1.63e-05	yes	up	_	_	_
c66969_g1	95.07	23.99	-1.98	8.17e-07	1.63e-05	yes	down	K16911	DDX21	path:ko01110
c47523_g1	4.49	0.18	-4.03	8.2e-07	1.64e-05	yes	down	K06596	chpA	path:ko02020
c48496_g1	13.41	3.38	-1.96	8.24e-07	1.65e-05	yes	down	_	_	_
c48743_g1	2.04	42.88	4.33	8.25e-07	1.65e-05	yes	up	K08486	STX1B_2_3	path:ko04130;path:ko04721
c55048_g2	2.57	0.06	-4.05	8.26e-07	1.65e-05	yes	down	_	_	_
c36228_g1	0.01	0.57	2.57	8.31e-07	1.66e-05	yes	up	_	_	_
c57992_g1	0.96	0.02	-3.09	8.33e-07	1.66e-05	yes	down	_	_	_
c64093_g1	1.74	0.07	-3.4	8.33e-07	1.66e-05	yes	down	K08235	E2.4.1.207	_
c3856_g1	3.73	0.29	-3.29	8.37e-07	1.67e-05	yes	down	K08360	CYB561	_
c65311_g3	1.05	7.21	2.67	8.41e-07	1.67e-05	yes	up	_	_	_
c61930_g1	0	1.63	4.11	8.52e-07	1.7e-05	yes	up	_	_	_
c73369_g1	7.26	0.07	-5.45	8.58e-07	1.71e-05	yes	down	_	_	_
c69721_g2	0.95	7.14	2.79	8.58e-07	1.71e-05	yes	up	_	_	_
c5796_g1	1.86	0	-4.29	8.59e-07	1.71e-05	yes	down	_	_	_
c49227_g2	2.46	0.25	-2.87	8.61e-07	1.71e-05	yes	down	K08099	E3.1.1.14	path:ko00860;path:ko01100;path:ko01110
c64263_g1	5.9	0.2	-4.3	8.68e-07	1.72e-05	yes	down	_	_	_
c68354_g4	1.68	0	-4.16	8.71e-07	1.73e-05	yes	down	K03549	kup	_
c57174_g1	0.65	5.42	2.89	8.72e-07	1.73e-05	yes	up	_	_	_
c59765_g1	35.29	154.74	2.13	8.8e-07	1.74e-05	yes	up	_	_	_
c58897_g1	0.03	1.59	3.73	8.84e-07	1.75e-05	yes	up	_	_	_
c28783_g1	7.3	121.03	4.03	8.99e-07	1.78e-05	yes	up	K03294	TC.APA	_
c73078_g1	4.3	0.3	-3.46	9.1e-07	1.8e-05	yes	down	_	_	_
c31704_g2	0.11	17.14	6.33	9.1e-07	1.8e-05	yes	up	_	_	_
c32145_g1	1.19	0.03	-3.32	9.11e-07	1.8e-05	yes	down	_	_	_
c70671_g1	11.7	1.17	-3.22	9.11e-07	1.8e-05	yes	down	_	_	_
c69982_g4	37.39	9.44	-1.97	9.13e-07	1.8e-05	yes	down	_	_	_
c37203_g1	1.32	0	-3.83	9.2e-07	1.81e-05	yes	down	_	_	_
c68129_g3	4.2	30.44	2.83	9.24e-07	1.82e-05	yes	up	K09284	AP2	_
c69342_g2	2.79	0.12	-3.7	9.29e-07	1.83e-05	yes	down	_	_	_
c32808_g1	16.04	2.99	-2.38	9.29e-07	1.83e-05	yes	down	K14488	SAUR	path:ko04075
c72169_g1	8.69	0.91	-3.11	9.36e-07	1.84e-05	yes	down	_	_	_
c66620_g1	1.37	0	-3.87	9.37e-07	1.84e-05	yes	down	_	_	_
c66646_g7	1.87	0	-4.3	9.41e-07	1.85e-05	yes	down	_	_	_
c60229_g1	0.56	0	-2.73	9.42e-07	1.85e-05	yes	down	_	_	_
c43179_g2	3.54	0.54	-2.51	9.44e-07	1.85e-05	yes	down	_	_	_
c71430_g1	1.17	0	-3.67	9.46e-07	1.86e-05	yes	down	_	_	_
c48422_g1	1959.11	394.33	-2.31	9.55e-07	1.87e-05	yes	down	_	_	_
c65688_g2	7.2	188.31	4.69	9.6e-07	1.88e-05	yes	up	K00430	E1.11.1.7	path:ko00940;path:ko01100;path:ko01110
c58250_g1	0	27.11	8.09	9.6e-07	1.88e-05	yes	up	_	_	_
c66085_g2	0.11	26.31	6.94	9.62e-07	1.88e-05	yes	up	_	_	_
c5352_g1	73.96	23.08	-1.68	9.63e-07	1.88e-05	yes	down	_	_	_
c38172_g1	125.68	554.71	2.14	9.67e-07	1.89e-05	yes	up	_	_	_
c49338_g1	5.73	0.45	-3.4	9.7e-07	1.9e-05	yes	down	_	_	_
c49451_g1	1.1	0.03	-3.25	9.79e-07	1.91e-05	yes	down	K13412	CPK	path:ko04626;path:ko05145
c71585_g1	0.03	2.54	4.38	9.8e-07	1.92e-05	yes	up	_	_	_
c70432_g1	0.03	6.82	5.7	9.83e-07	1.92e-05	yes	up	_	_	_
c71420_g1	17.31	3.6	-2.23	9.83e-07	1.92e-05	yes	down	_	_	_
c101940_g1	2.5	0.09	-3.76	9.89e-07	1.93e-05	yes	down	_	_	_
c69524_g1	1.69	0.07	-3.43	9.98e-07	1.95e-05	yes	down	_	_	_
c52530_g1	0.48	0	-2.52	1e-06	1.95e-05	yes	down	K02575	NRT, narK, nrtP, nasA	path:ko00910
c67400_g2	1	22.8	4.38	1.02e-06	1.98e-05	yes	up	_	_	_
c63961_g1	0.02	2.99	4.63	1.02e-06	1.99e-05	yes	up	_	_	_
c58078_g1	1.42	0	-3.93	1.02e-06	1.99e-05	yes	down	_	_	_
c40963_g1	0.03	1.55	3.65	1.04e-06	2.01e-05	yes	up	_	_	_
c54740_g1	12.21	3.27	-1.87	1.04e-06	2.02e-05	yes	down	_	_	_
c66397_g1	38.98	1449.74	5.21	1.04e-06	2.03e-05	yes	up	_	_	_
c49158_g2	0.84	0	-3.23	1.05e-06	2.04e-05	yes	down	_	_	_
c60756_g2	12.22	1.75	-2.73	1.05e-06	2.04e-05	yes	down	_	_	_
c25125_g1	1.32	0	-3.82	1.06e-06	2.05e-05	yes	down	_	_	_
c66566_g4	0.17	2.73	3.4	1.07e-06	2.07e-05	yes	up	_	_	_
c65464_g2	0.08	3.73	4.38	1.07e-06	2.07e-05	yes	up	_	_	_
c54976_g2	38.29	10.2	-1.9	1.07e-06	2.08e-05	yes	down	_	_	_
c23576_g1	1.29	7.19	2.39	1.07e-06	2.08e-05	yes	up	_	_	_
c54216_g1	22.58	5.43	-2.04	1.08e-06	2.08e-05	yes	down	_	_	_
c67102_g1	0.23	14.49	5.49	1.08e-06	2.08e-05	yes	up	_	_	_
c42396_g2	2.78	0.06	-4.17	1.08e-06	2.09e-05	yes	down	_	_	_
c62482_g2	0.88	20.1	4.37	1.09e-06	2.11e-05	yes	up	_	_	_
c44960_g2	5.25	0	-5.74	1.09e-06	2.11e-05	yes	down	_	_	_
c69039_g2	7.64	1.36	-2.4	1.1e-06	2.12e-05	yes	down	K08282	E2.7.11.1	_
c66734_g1	0.29	25.28	6.04	1.1e-06	2.12e-05	yes	up	K14638	SLC15A3_4, PHT	_
c70353_g3	4.78	0.39	-3.31	1.11e-06	2.13e-05	yes	down	_	_	_
c65350_g4	0.15	3.63	3.87	1.11e-06	2.13e-05	yes	up	K03696	clpC	_
c68033_g1	10.39	1.36	-2.84	1.11e-06	2.14e-05	yes	down	_	_	_
c70523_g2	1.62	0	-4.11	1.11e-06	2.14e-05	yes	down	K01322	PREP	path:ko04614
c62244_g1	0.02	3.51	4.97	1.12e-06	2.15e-05	yes	up	_	_	_
c59111_g3	3.91	0.52	-2.69	1.12e-06	2.15e-05	yes	down	K00006	GPD1	path:ko00564;path:ko01110;path:ko04011
c54222_g3	16.39	0.71	-4.35	1.12e-06	2.15e-05	yes	down	_	_	_
c57259_g1	10.46	1.49	-2.73	1.12e-06	2.15e-05	yes	down	_	_	_
c56694_g2	0.61	5.1	2.87	1.12e-06	2.15e-05	yes	up	K18789	XGD1	_
c48681_g1	4.06	97.21	4.55	1.13e-06	2.16e-05	yes	up	_	_	_
c71069_g3	0	1.13	3.62	1.13e-06	2.17e-05	yes	up	_	_	_
c62532_g1	1.42	0.02	-3.63	1.14e-06	2.18e-05	yes	down	_	_	_
c69212_g5	0.82	0	-3.2	1.14e-06	2.18e-05	yes	down	_	_	_
c51242_g1	0	5.17	5.72	1.14e-06	2.19e-05	yes	up	_	_	_
c45126_g1	2.73	0.14	-3.57	1.14e-06	2.19e-05	yes	down	_	_	_
c69723_g1	6.4	0.98	-2.58	1.15e-06	2.2e-05	yes	down	_	_	_
c67404_g5	0.09	20.52	6.8	1.15e-06	2.2e-05	yes	up	_	_	_
c15468_g1	234.21	73.15	-1.68	1.16e-06	2.21e-05	yes	down	_	_	_
c62507_g1	0.22	12.37	5.29	1.16e-06	2.21e-05	yes	up	_	_	_
c66500_g1	8.28	0.3	-4.41	1.16e-06	2.21e-05	yes	down	K14488	SAUR	path:ko04075
c18865_g1	27.89	5.38	-2.35	1.16e-06	2.22e-05	yes	down	_	_	_
c63680_g1	0.03	4.94	5.31	1.16e-06	2.22e-05	yes	up	_	_	_
c43815_g3	0.07	4.9	4.86	1.16e-06	2.22e-05	yes	up	_	_	_
c70352_g3	1.92	0	-4.34	1.16e-06	2.22e-05	yes	down	K14488	SAUR	path:ko04075
c39757_g1	0	7.24	6.2	1.17e-06	2.22e-05	yes	up	_	_	_
c40583_g1	11.66	2.65	-2.1	1.17e-06	2.23e-05	yes	down	K04371	MAPK1_3	path:ko04010;path:ko04011;path:ko04012;path:ko04013;path:ko04014;path:ko04015;path:ko04022;path:ko04024;path:ko04062;path:ko04066;path:ko04068;path:ko04071;path:ko04072;path:ko04114;path:ko04150;path:ko04151;path:ko04210;path:ko04261;path:ko04270;path:ko04320;path:ko04350;path:ko04360;path:ko04370;path:ko04380;path:ko04510;path:ko04520;path:ko04540;path:ko04550;path:ko04611;path:ko04620;path:ko04…
c63096_g2	0.48	6.64	3.54	1.18e-06	2.24e-05	yes	up	_	_	_
c45176_g1	4.92	0.34	-3.51	1.18e-06	2.24e-05	yes	down	_	_	_
c60756_g1	8.45	1.35	-2.56	1.19e-06	2.25e-05	yes	down	_	_	_
c29280_g2	0	12.82	7.01	1.19e-06	2.25e-05	yes	up	K05909	E1.10.3.2	_
c44327_g1	1.48	0.11	-2.91	1.2e-06	2.28e-05	yes	down	K04733	IRAK4	path:ko04064;path:ko04620;path:ko04722;path:ko05133;path:ko05140;path:ko05142;path:ko05145;path:ko05152;path:ko05162;path:ko05164
c58888_g1	17.78	3.1	-2.48	1.21e-06	2.29e-05	yes	down	_	_	_
c63792_g1	0.21	3.25	3.42	1.22e-06	2.3e-05	yes	up	_	_	_
c70147_g16	1.99	13.34	2.69	1.22e-06	2.31e-05	yes	up	_	_	_
c69203_g1	0.83	0	-3.21	1.22e-06	2.32e-05	yes	down	_	_	_
c66758_g1	1.2	0.04	-3.21	1.23e-06	2.32e-05	yes	down	_	_	_
c21730_g1	20.34	114.98	2.49	1.23e-06	2.32e-05	yes	up	_	_	_
c46911_g1	6.13	0.33	-3.84	1.23e-06	2.33e-05	yes	down	_	_	_
c38214_g1	2.94	0.23	-3.2	1.23e-06	2.33e-05	yes	down	_	_	_
c71582_g4	1.27	27.29	4.32	1.24e-06	2.34e-05	yes	up	_	_	_
c68710_g1	0.99	48.75	5.48	1.25e-06	2.36e-05	yes	up	K13447	RBOH	path:ko04626
c55060_g3	0.01	1.1	3.44	1.26e-06	2.38e-05	yes	up	_	_	_
c38012_g2	5.65	0.5	-3.26	1.27e-06	2.4e-05	yes	down	_	_	_
c69894_g9	4.92	29.42	2.56	1.28e-06	2.41e-05	yes	up	K08678	UXS1, uxs	path:ko00500;path:ko00520;path:ko01100
c39202_g1	6.62	0.67	-3.13	1.28e-06	2.42e-05	yes	down	_	_	_
c59115_g3	1.86	0.05	-3.72	1.29e-06	2.44e-05	yes	down	K14638	SLC15A3_4, PHT	_
c70390_g3	7.38	0.39	-3.92	1.3e-06	2.44e-05	yes	down	_	_	_
c1935_g1	5.4	0.26	-3.93	1.3e-06	2.44e-05	yes	down	_	_	_
c60464_g1	1.5	0	-4	1.3e-06	2.44e-05	yes	down	K09285	OVM, ANT	_
c55048_g1	4.43	0.33	-3.39	1.32e-06	2.48e-05	yes	down	_	_	_
c67441_g1	7.58	33.83	2.14	1.33e-06	2.49e-05	yes	up	_	_	_
c71426_g7	0.89	0.02	-2.98	1.33e-06	2.5e-05	yes	down	_	_	_
c64648_g1	138.24	40.69	-1.76	1.34e-06	2.51e-05	yes	down	_	_	_
c68254_g1	7.5	1.32	-2.42	1.34e-06	2.52e-05	yes	down	_	_	_
c94528_g1	0.03	12.51	6.59	1.35e-06	2.52e-05	yes	up	_	_	_
c52102_g1	14.34	3.41	-2.04	1.35e-06	2.54e-05	yes	down	_	_	_
c64918_g2	5.39	0.67	-2.83	1.36e-06	2.55e-05	yes	down	_	_	_
c24690_g2	0.16	6.98	4.74	1.37e-06	2.56e-05	yes	up	_	_	_
c68658_g2	1.19	0	-3.69	1.37e-06	2.56e-05	yes	down	_	_	_
c37684_g2	4.74	0.64	-2.7	1.37e-06	2.57e-05	yes	down	K05658	ABCB1	path:ko02010;path:ko04976;path:ko05206
c69742_g2	9.37	39.68	2.07	1.37e-06	2.57e-05	yes	up	_	_	_
c45743_g2	37.23	156.53	2.07	1.39e-06	2.59e-05	yes	up	K00033	PGD, gnd, gntZ	path:ko00030;path:ko00480;path:ko01100;path:ko01110;path:ko01120;path:ko01130;path:ko01200
c60974_g1	3.83	19.2	2.3	1.45e-06	2.71e-05	yes	up	_	_	_
c63869_g1	10.72	2.41	-2.11	1.46e-06	2.72e-05	yes	down	_	_	_
c63064_g4	0	1.11	3.6	1.49e-06	2.78e-05	yes	up	_	_	_
c32656_g1	0.12	2.76	3.68	1.49e-06	2.78e-05	yes	up	_	_	_
c69673_g1	0.02	12.78	6.74	1.5e-06	2.79e-05	yes	up	_	_	_
c56331_g1	2.73	0.23	-3.08	1.53e-06	2.86e-05	yes	down	_	_	_
c38147_g1	1.16	0	-3.66	1.54e-06	2.86e-05	yes	down	_	_	_
c53417_g1	0.11	2.17	3.4	1.54e-06	2.87e-05	yes	up	_	_	_
c42536_g1	1.54	0.17	-2.6	1.57e-06	2.92e-05	yes	down	K00454	LOX2S	path:ko00591;path:ko00592;path:ko01100;path:ko01110
c31871_g1	1.88	0.02	-4.04	1.58e-06	2.94e-05	yes	down	K01213	E3.2.1.67	path:ko00040;path:ko00500;path:ko01100
c67577_g3	7.29	1.58	-2.14	1.58e-06	2.94e-05	yes	down	_	_	_
c52128_g1	0.75	0	-3.09	1.59e-06	2.95e-05	yes	down	_	_	_
c52644_g2	1.18	48.78	5.25	1.6e-06	2.96e-05	yes	up	_	_	_
c62271_g2	1.77	0.05	-3.62	1.61e-06	2.99e-05	yes	down	_	_	_
c46284_g1	28.22	7.01	-1.99	1.61e-06	2.99e-05	yes	down	K19035	PSRP6	_
c72344_g1	9.95	49.61	2.31	1.61e-06	2.99e-05	yes	up	_	_	_
c94924_g1	0.02	1.27	3.53	1.62e-06	3.01e-05	yes	up	_	_	_
c62809_g2	1.4	0.06	-3.25	1.65e-06	3.06e-05	yes	down	K14484	IAA	path:ko04075
c68360_g1	1.57	0.14	-2.78	1.66e-06	3.06e-05	yes	down	_	_	_
c67104_g2	0	0.85	3.19	1.68e-06	3.1e-05	yes	up	K10742	DNA2	path:ko03030
c71370_g1	40.66	731.9	4.17	1.69e-06	3.11e-05	yes	up	_	_	_
c65243_g1	0	1.49	3.99	1.69e-06	3.12e-05	yes	up	_	_	_
c57890_g2	28.08	150.72	2.42	1.7e-06	3.13e-05	yes	up	K01623	ALDO	path:ko00010;path:ko00030;path:ko00051;path:ko00680;path:ko00710;path:ko01100;path:ko01110;path:ko01120;path:ko01130;path:ko01200;path:ko01230
c16981_g2	12.71	0.63	-4.14	1.7e-06	3.14e-05	yes	down	_	_	_
c66721_g4	3.4	0.21	-3.51	1.7e-06	3.14e-05	yes	down	_	_	_
c66588_g1	0.22	5.71	4.16	1.71e-06	3.16e-05	yes	up	_	_	_
c88982_g1	0.1	2.67	3.79	1.72e-06	3.16e-05	yes	up	_	_	_
c64619_g1	57.54	14.06	-2.03	1.73e-06	3.19e-05	yes	down	_	_	_
c66583_g1	0.16	2.81	3.46	1.75e-06	3.22e-05	yes	up	_	_	_
c55087_g1	0.69	0	-2.97	1.75e-06	3.22e-05	yes	down	_	_	_
c39140_g1	1.42	0.05	-3.35	1.75e-06	3.22e-05	yes	down	K01611	speD, AMD1	path:ko00270;path:ko00330;path:ko01100
c65665_g4	25.44	2.32	-3.4	1.77e-06	3.25e-05	yes	down	K06569	MFI2	_
c87166_g1	0.11	28.9	7.09	1.77e-06	3.25e-05	yes	up	_	_	_
c55712_g1	17.57	153.3	3.12	1.78e-06	3.26e-05	yes	up	_	_	_
c68122_g2	0.96	9.35	3.16	1.78e-06	3.26e-05	yes	up	_	_	_
c61370_g1	0	3.07	4.99	1.8e-06	3.3e-05	yes	up	_	_	_
c49501_g3	2.23	0	-4.54	1.81e-06	3.32e-05	yes	down	_	_	_
c58722_g1	0	12.86	7.02	1.84e-06	3.36e-05	yes	up	_	_	_
[truncated: 61,065 more rows]

## Sheet: Ch03vsCh04
seq_id	Ch03_mean_fpkm	Ch04_mean_fpkm	logFC(Ch04/Ch03)	p-value	FDR	significant	regulate	Gene_ID	KEGG_Gene	KEGG_Pathway
c60959_g1	2062.67	1.26	-10.57	5.65e-33	1.79e-28	yes	down	_	_	_
c69841_g5	0.18	77.82	8.1	3.35e-26	5.3e-22	yes	up	_	_	_
c51241_g1	0.17	75.48	8.12	3.02e-25	3.18e-21	yes	up	K13262	7-IOMT	path:ko00943
c63127_g2	0.48	209.62	8.5	1.08e-24	8.58e-21	yes	up	_	_	_
c63339_g1	19.03	0	-7.58	5.27e-24	3.34e-20	yes	down	_	_	_
c69048_g2	45.22	0.9	-5.51	8.1e-24	4.27e-20	yes	down	K09873	TIP	_
c69145_g3	0	61.8	9.27	8.05e-23	3.64e-19	yes	up	_	_	_
c17777_g1	36.68	0.31	-6.48	1.61e-22	6.36e-19	yes	down	K01285	PRCP	path:ko04614;path:ko04974
c2402_g1	0.14	177.36	9.53	8.78e-22	3.09e-18	yes	up	_	_	_
c71405_g2	0.32	56.46	7.07	1.98e-21	6.28e-18	yes	up	K12937	UGAT	path:ko00942
c57674_g1	0.17	118.78	8.77	3.68e-20	1.05e-16	yes	up	_	_	_
c72207_g1	101.96	0.05	-9.45	3.98e-20	1.05e-16	yes	down	_	_	_
c66501_g2	0	8.03	6.28	4.75e-20	1.14e-16	yes	up	_	_	_
c64020_g1	0.47	42.28	6.21	5.06e-20	1.14e-16	yes	up	_	_	_
c69983_g1	26.54	0.02	-7.82	1.62e-19	3.41e-16	yes	down	K13754	SLC24A6, NCKX6	_
c8560_g1	1119.1	0.52	-10.81	3.17e-19	6.28e-16	yes	down	_	_	_
c16074_g1	2069.75	0.73	-11.29	1.13e-18	2.1e-15	yes	down	K01369	LGMN	path:ko04142;path:ko04612
c37004_g1	62.77	0.08	-8.47	1.23e-18	2.16e-15	yes	down	_	_	_
c16046_g1	2010.69	10.91	-7.51	1.88e-18	3.14e-15	yes	down	_	_	_
c67636_g2	0.1	54.44	8.09	2.21e-18	3.43e-15	yes	up	_	_	_
c26320_g1	231.16	15.84	-3.86	2.28e-18	3.43e-15	yes	down	K00588	E2.1.1.104	path:ko00360;path:ko00940;path:ko00941;path:ko00945;path:ko01100;path:ko01110
c18962_g1	677.01	0.39	-10.44	5.44e-18	7.83e-15	yes	down	_	_	_
c27381_g1	216.64	0.33	-8.98	7.31e-18	1.01e-14	yes	down	_	_	_
c422_g1	140.38	6.69	-4.37	9.03e-18	1.19e-14	yes	down	K01951	guaA, GMPS	path:ko00230;path:ko00983;path:ko01100
c63699_g1	19.95	0.08	-6.78	1.7e-17	2.15e-14	yes	down	K01051	E3.1.1.11	path:ko00040;path:ko00500;path:ko01100
c71790_g1	1.26	67.4	5.64	1.96e-17	2.37e-14	yes	up	_	_	_
c41130_g3	378.36	0.67	-8.95	2.02e-17	2.37e-14	yes	down	_	_	_
c70823_g4	0.24	78.98	7.86	3.97e-17	4.49e-14	yes	up	_	_	_
c63994_g1	0	77.33	9.6	6.72e-17	7.34e-14	yes	up	_	_	_
c56705_g1	113.25	1.85	-5.86	9.54e-17	1.01e-13	yes	down	K08235	E2.4.1.207	_
c11358_g1	8.37	0	-6.4	1.17e-16	1.19e-13	yes	down	K19355	MAN	path:ko00051
c57259_g1	1.49	58.27	5.2	1.25e-16	1.2e-13	yes	up	_	_	_
c59328_g1	0.17	63.41	7.85	1.25e-16	1.2e-13	yes	up	_	_	_
c66386_g1	361.6	0.22	-10.16	1.52e-16	1.4e-13	yes	down	_	_	_
c67552_g1	427.76	31.68	-3.75	1.55e-16	1.4e-13	yes	down	K17099	ANXA13	_
c67926_g2	0.02	79.49	9.32	1.91e-16	1.68e-13	yes	up	_	_	_
c65018_g1	0.01	20.74	7.57	2.17e-16	1.85e-13	yes	up	_	_	_
c66919_g2	18.71	0.83	-4.34	2.49e-16	2.08e-13	yes	down	K01051	E3.1.1.11	path:ko00040;path:ko00500;path:ko01100
c72159_g1	52.74	1.48	-5.07	3.15e-16	2.56e-13	yes	down	K08235	E2.4.1.207	_
c69924_g1	0.03	14.62	6.78	3.38e-16	2.68e-13	yes	up	_	_	_
c70950_g3	0.07	16.79	6.64	3.59e-16	2.77e-13	yes	up	_	_	_
c16046_g2	362.09	4.77	-6.22	4.89e-16	3.69e-13	yes	down	_	_	_
c31418_g1	101.54	0.93	-6.63	5.16e-16	3.8e-13	yes	down	K00507	SCD, desC	path:ko01040;path:ko01212;path:ko03320;path:ko04152;path:ko04212
c66306_g1	0	4.99	5.67	6.18e-16	4.44e-13	yes	up	_	_	_
c70480_g1	0.38	45.73	6.58	9.12e-16	6.38e-13	yes	up	_	_	_
c71465_g2	0.27	9.64	4.7	9.27e-16	6.38e-13	yes	up	_	_	_
c59099_g1	231.37	0.11	-10.12	1.01e-15	6.78e-13	yes	down	_	_	_
c17980_g1	0.11	56.17	8.04	1.16e-15	7.64e-13	yes	up	_	_	_
c23403_g1	102.46	3048.77	4.89	1.34e-15	8.65e-13	yes	up	K14504	TCH4	path:ko04075
c108769_g1	289.43	0.13	-10.33	1.71e-15	1.08e-12	yes	down	_	_	_
c55307_g1	0.1	19.83	6.61	1.93e-15	1.2e-12	yes	up	_	_	_
c65457_g1	0	6.13	5.96	2.56e-15	1.56e-12	yes	up	_	_	_
c62044_g2	14.73	0.12	-6.1	3.18e-15	1.9e-12	yes	down	K14490	AHP	path:ko04075
c87499_g1	1.28	75.19	5.77	3.45e-15	2.02e-12	yes	up	_	_	_
c61048_g1	116.39	3.73	-4.93	5.01e-15	2.88e-12	yes	down	_	_	_
c68402_g3	14.21	0.2	-5.58	5.22e-15	2.95e-12	yes	down	_	_	_
c53518_g1	29.09	1.2	-4.49	7.4e-15	4.11e-12	yes	down	_	_	_
c67400_g2	22.8	0	-7.84	8.07e-15	4.4e-12	yes	down	_	_	_
c3904_g1	0.41	34.93	6.11	9.53e-15	5.11e-12	yes	up	K00764	purF, PPAT	path:ko00230;path:ko00250;path:ko01100;path:ko01110;path:ko01130
c66506_g3	1.46	26.13	4.07	1.3e-14	6.87e-12	yes	up	K14486	K14486, ARF	path:ko04075
c38423_g1	150.24	0.34	-8.42	1.4e-14	7.28e-12	yes	down	_	_	_
c4309_g1	81.47	0	-9.67	1.58e-14	8.07e-12	yes	down	_	_	_
c58727_g2	1.8	96.71	5.67	1.68e-14	8.45e-12	yes	up	_	_	_
c23481_g1	192.19	0	-10.91	1.96e-14	9.67e-12	yes	down	_	_	_
c39340_g1	61.85	2.69	-4.47	2.02e-14	9.82e-12	yes	down	_	_	_
c58269_g1	18.98	0.07	-6.78	2.18e-14	1.05e-11	yes	down	K08235	E2.4.1.207	_
c108733_g1	124.87	0.4	-7.96	2.36e-14	1.11e-11	yes	down	_	_	_
c65876_g2	2.29	101.14	5.41	2.69e-14	1.25e-11	yes	up	K15639	CYP734A1, BAS1	path:ko00905
c21579_g1	1376.04	35.31	-5.28	3.11e-14	1.43e-11	yes	down	_	_	_
c8582_g2	1.96	73.77	5.16	3.26e-14	1.47e-11	yes	up	K17279	REEP5_6	_
c68264_g1	2.15	60.52	4.75	3.74e-14	1.67e-11	yes	up	_	_	_
c16257_g1	1380.86	5.76	-7.88	3.99e-14	1.75e-11	yes	down	_	_	_
c21228_g1	0	250.38	11.29	4.77e-14	2.07e-11	yes	up	_	_	_
c66397_g1	1449.74	3.14	-8.81	5.16e-14	2.21e-11	yes	down	_	_	_
c70013_g1	1112.8	5.7	-7.58	5.35e-14	2.26e-11	yes	down	_	_	_
c19960_g1	85.96	0	-9.75	5.89e-14	2.45e-11	yes	down	_	_	_
c70086_g1	0.04	20.28	7.23	6.68e-14	2.74e-11	yes	up	_	_	_
c65288_g1	0.77	894.74	10.01	7.55e-14	3.06e-11	yes	up	_	_	_
c68399_g1	0.16	8.98	5.1	8.86e-14	3.55e-11	yes	up	_	_	_
c64833_g1	14.87	0.32	-5.15	9.76e-14	3.86e-11	yes	down	_	_	_
c61329_g1	43.47	0.06	-8.08	1.32e-13	5.16e-11	yes	down	_	_	_
c64245_g1	6299.19	5.02	-10.27	1.65e-13	6.35e-11	yes	down	K13412	CPK	path:ko04626;path:ko05145
c51396_g2	0	13.88	7.13	3.63e-13	1.39e-10	yes	up	K00276	AOC3, AOC2, tynA	path:ko00260;path:ko00350;path:ko00360;path:ko00410;path:ko00950;path:ko00960;path:ko01100;path:ko01110
c71829_g3	1.26	35.39	4.71	3.93e-13	1.48e-10	yes	up	_	_	_
c87222_g1	0.71	26.9	5.07	4.06e-13	1.51e-10	yes	up	K09286	EREBP	_
c57558_g1	0.1	22.63	6.85	4.73e-13	1.74e-10	yes	up	_	_	_
c69841_g8	0.46	72.67	7.03	5.18e-13	1.88e-10	yes	up	_	_	_
c48967_g1	0.95	66.33	5.98	5.23e-13	1.88e-10	yes	up	_	_	_
c67676_g1	26.65	0.05	-7.48	5.33e-13	1.88e-10	yes	down	K15400	HHT1	path:ko00073
c72775_g1	29.91	0	-8.23	5.39e-13	1.88e-10	yes	down	_	_	_
c51241_g3	0.08	12.87	6.19	5.41e-13	1.88e-10	yes	up	_	_	_
c79527_g1	21.75	2.65	-2.99	6.99e-13	2.41e-10	yes	down	K09458	fabF	path:ko00061;path:ko00780;path:ko01100;path:ko01212
c57263_g3	12.53	0.77	-3.85	7.08e-13	2.41e-10	yes	down	_	_	_
c64020_g2	0.15	49.4	7.62	7.53e-13	2.54e-10	yes	up	_	_	_
c57259_g2	1.9	78.01	5.29	8.04e-13	2.68e-10	yes	up	_	_	_
c66138_g1	0.12	35.98	7.38	8.96e-13	2.96e-10	yes	up	_	_	_
c39512_g2	5.32	324.27	5.9	9.4e-13	3.07e-10	yes	up	_	_	_
c18735_g1	0.63	39.9	5.77	1.03e-12	3.33e-10	yes	up	_	_	_
c18808_g1	25.39	0.83	-4.78	1.11e-12	3.54e-10	yes	down	_	_	_
c47831_g1	0.77	30.35	5.13	1.13e-12	3.57e-10	yes	up	K09286	EREBP	_
c71123_g2	8.01	214.34	4.72	1.18e-12	3.69e-10	yes	up	K01592	E4.1.1.25	path:ko00350;path:ko00950;path:ko01100;path:ko01110
c24123_g1	169.79	0	-10.73	1.21e-12	3.76e-10	yes	down	_	_	_
c48232_g1	332	1.14	-8.06	1.31e-12	4.02e-10	yes	down	K00430	E1.11.1.7	path:ko00940;path:ko01100;path:ko01110
c22254_g2	0.07	11.62	6.12	1.48e-12	4.5e-10	yes	up	_	_	_
c67526_g1	3.22	66.96	4.34	1.67e-12	5.03e-10	yes	up	_	_	_
c47104_g1	85.53	0.22	-8.09	1.68e-12	5.03e-10	yes	down	_	_	_
c45715_g1	25.65	0.06	-7.38	1.74e-12	5.14e-10	yes	down	_	_	_
c27062_g1	227.72	0.14	-9.91	2.38e-12	6.97e-10	yes	down	_	_	_
c66900_g2	122.49	0.2	-8.67	2.42e-12	7.02e-10	yes	down	K16297	SCPL-II	_
c70783_g2	118.54	1.59	-6.13	2.48e-12	7.07e-10	yes	down	_	_	_
c65197_g1	4.64	218.95	5.53	2.48e-12	7.07e-10	yes	up	_	_	_
c52425_g2	17.35	0.08	-6.61	2.54e-12	7.17e-10	yes	down	_	_	_
c70950_g4	0.07	36.72	7.74	2.93e-12	8.19e-10	yes	up	K15925	XYL1	_
c24690_g1	10.7	0.06	-6.1	3.02e-12	8.32e-10	yes	down	_	_	_
c71820_g1	1.74	119.01	6.02	3.02e-12	8.32e-10	yes	up	_	_	_
c26973_g1	4.83	69.35	3.82	3.7e-12	1.01e-09	yes	up	K18491	ESX1	path:ko04550
c31418_g3	51.79	0.26	-7.16	3.74e-12	1.01e-09	yes	down	_	_	_
c70684_g1	62.16	0.51	-6.66	4.08e-12	1.09e-09	yes	down	_	_	_
c65553_g3	0.02	6.27	5.74	4.2e-12	1.12e-09	yes	up	_	_	_
c48878_g1	209.19	0.24	-9.25	4.33e-12	1.14e-09	yes	down	_	_	_
c65735_g2	138.34	3.09	-5.44	4.47e-12	1.17e-09	yes	down	K06890	K06890	_
c52816_g1	15.59	0.67	-4.35	4.74e-12	1.23e-09	yes	down	_	_	_
c66701_g3	44.46	0.23	-7.1	5.27e-12	1.35e-09	yes	down	_	_	_
c49729_g1	3.14	96.48	4.9	5.29e-12	1.35e-09	yes	up	K14497	PP2C	path:ko04075;path:ko04931
c48747_g2	45.92	0.54	-6.17	5.32e-12	1.35e-09	yes	down	K07052	K07052	_
c71814_g5	0.03	6.8	5.71	5.42e-12	1.36e-09	yes	up	K01514	PRUNE, PPX1	path:ko00230
c61356_g1	12.19	0.17	-5.53	6.06e-12	1.51e-09	yes	down	_	_	_
c68582_g2	5.47	223.48	5.33	6.33e-12	1.57e-09	yes	up	K15813	LUP4	path:ko00909;path:ko01110
c94614_g1	0	57.99	9.18	6.4e-12	1.57e-09	yes	up	K05748	WASF2	path:ko04520;path:ko04666;path:ko04810;path:ko05100;path:ko05131;path:ko05132;path:ko05231
c86874_g1	29.57	1.14	-4.58	7.2e-12	1.75e-09	yes	down	K08235	E2.4.1.207	_
c60066_g1	3.57	51.05	3.8	8.65e-12	2.09e-09	yes	up	K08176	PHO84	_
c55108_g1	0.52	16.6	4.75	9e-12	2.14e-09	yes	up	_	_	_
c71018_g2	0.2	17.37	5.86	9.01e-12	2.14e-09	yes	up	_	_	_
c67972_g1	0.03	4.7	5.22	9.17e-12	2.17e-09	yes	up	_	_	_
c61843_g1	2.08	38.39	4.14	9.65e-12	2.26e-09	yes	up	_	_	_
c68468_g4	0.22	91.32	8.14	1.2e-11	2.79e-09	yes	up	_	_	_
c66959_g4	13.05	160.58	3.61	1.35e-11	3.13e-09	yes	up	_	_	_
c69841_g7	0	81.83	9.68	1.39e-11	3.18e-09	yes	up	_	_	_
c18824_g1	4.07	40.72	3.29	1.48e-11	3.38e-09	yes	up	_	_	_
c68179_g1	1.17	152.04	6.91	1.51e-11	3.42e-09	yes	up	K07437	CYP26A	path:ko00830;path:ko01100
c71939_g2	0.51	31.6	5.7	1.56e-11	3.51e-09	yes	up	_	_	_
c52467_g2	15.99	0.89	-4.02	1.7e-11	3.79e-09	yes	down	_	_	_
c55855_g1	0.55	32.51	5.65	1.78e-11	3.94e-09	yes	up	_	_	_
c68814_g1	0.05	11.36	6.27	1.82e-11	3.99e-09	yes	up	_	_	_
c70730_g4	4.99	86.71	4.09	1.85e-11	4.05e-09	yes	up	_	_	_
c57582_g1	0	54.09	9.08	1.89e-11	4.09e-09	yes	up	_	_	_
c11156_g1	0.05	38.45	8.05	1.93e-11	4.14e-09	yes	up	_	_	_
c64718_g3	0.13	46.44	7.65	1.94e-11	4.14e-09	yes	up	_	_	_
c50676_g1	588.18	55.89	-3.39	2.02e-11	4.28e-09	yes	down	_	_	_
c61179_g1	17.02	0	-7.42	2.1e-11	4.42e-09	yes	down	_	_	_
c79665_g1	31.02	0.8	-5.11	2.14e-11	4.48e-09	yes	down	_	_	_
c68735_g2	2531.01	88.41	-4.84	2.25e-11	4.68e-09	yes	down	_	_	_
c52961_g1	84.27	0	-9.72	2.41e-11	4.98e-09	yes	down	_	_	_
c18336_g1	37.36	469.2	3.65	2.57e-11	5.28e-09	yes	up	_	_	_
c62481_g1	62.62	0.08	-8.45	2.63e-11	5.36e-09	yes	down	_	_	_
c70807_g1	7.05	0.21	-4.52	2.83e-11	5.74e-09	yes	down	K18801	GXM	_
c68157_g3	2.23	194.43	6.38	2.98e-11	6.01e-09	yes	up	_	_	_
c37550_g1	5.26	55.16	3.37	3.21e-11	6.42e-09	yes	up	_	_	_
c60751_g1	4.98	0	-5.67	3.29e-11	6.54e-09	yes	down	_	_	_
c54562_g1	62.55	0.95	-5.9	3.32e-11	6.57e-09	yes	down	_	_	_
c101362_g1	158.73	2.03	-6.22	3.46e-11	6.81e-09	yes	down	_	_	_
c71388_g2	68.11	1.86	-5.12	3.49e-11	6.81e-09	yes	down	_	_	_
c31418_g2	116.3	0	-10.18	3.94e-11	7.65e-09	yes	down	K00507	SCD, desC	path:ko01040;path:ko01212;path:ko03320;path:ko04152;path:ko04212
c48747_g1	15.04	0	-7.24	4.09e-11	7.9e-09	yes	down	K07052	K07052	_
c71153_g1	90.76	9.95	-3.18	4.25e-11	8.14e-09	yes	down	K01193	E3.2.1.26, sacA	path:ko00052;path:ko00500;path:ko01100
c56969_g1	12.8	0.02	-6.73	4.35e-11	8.3e-09	yes	down	_	_	_
c36702_g1	16.48	0.3	-5.36	4.4e-11	8.33e-09	yes	down	_	_	_
c60342_g1	42.9	0	-8.75	4.51e-11	8.49e-09	yes	down	_	_	_
c69952_g1	59.85	3.41	-4.09	4.54e-11	8.5e-09	yes	down	_	_	_
c30855_g1	3.47	1672.09	8.87	5.16e-11	9.61e-09	yes	up	_	_	_
c55252_g1	98.31	1.18	-6.27	6.3e-11	1.17e-08	yes	down	_	_	_
c49428_g1	13806.2	950.14	-3.86	6.47e-11	1.19e-08	yes	down	_	_	_
c102647_g1	23.9	1.16	-4.26	6.83e-11	1.25e-08	yes	down	_	_	_
c40951_g1	3	30.46	3.3	7.12e-11	1.3e-08	yes	up	K12118	CRY1	path:ko04712
c60851_g1	0	12.61	6.99	7.35e-11	1.33e-08	yes	up	K13422	MYC2	path:ko04075
c66900_g1	134.69	0.41	-8.05	8.13e-11	1.46e-08	yes	down	K16297	SCPL-II	_
c58171_g1	119.28	1.63	-6.11	8.25e-11	1.48e-08	yes	down	_	_	_
c53212_g1	112.21	0	-10.13	8.76e-11	1.56e-08	yes	down	_	_	_
c64000_g1	1.8	64.88	5.09	9.05e-11	1.6e-08	yes	up	K08232	E1.6.5.4	path:ko00053;path:ko01100
c71349_g3	0.07	8.24	5.65	9.15e-11	1.61e-08	yes	up	_	_	_
c62363_g1	0.03	53.74	8.65	1.02e-10	1.79e-08	yes	up	_	_	_
c71865_g1	0.27	9.4	4.7	1.04e-10	1.8e-08	yes	up	K17604	ZSWIM3	_
c22254_g1	0.1	7.92	5.34	1.09e-10	1.89e-08	yes	up	_	_	_
c69942_g2	0.02	5.33	5.54	1.1e-10	1.89e-08	yes	up	_	_	_
c67076_g2	1.41	22.33	3.89	1.11e-10	1.9e-08	yes	up	_	_	_
c69955_g5	2.18	97.04	5.41	1.16e-10	1.97e-08	yes	up	K18592	GGT1_5	path:ko00430;path:ko00460;path:ko00480;path:ko00590;path:ko01100
c94008_g1	469.58	17.62	-4.73	1.18e-10	1.99e-08	yes	down	K00517	E1.14.-.-	path:ko00363;path:ko00624;path:ko00627;path:ko00903;path:ko00945;path:ko01100;path:ko01110;path:ko01120
c70263_g5	0.02	8.1	6.1	1.22e-10	2.05e-08	yes	up	_	_	_
c53016_g1	20.62	2.41	-3.04	1.23e-10	2.06e-08	yes	down	K14379	ACP5	path:ko04142;path:ko04380;path:ko05323
c71611_g4	11.81	0.09	-5.99	1.24e-10	2.06e-08	yes	down	K07198	PRKAA, AMPK	path:ko04068;path:ko04140;path:ko04150;path:ko04151;path:ko04152;path:ko04211;path:ko04213;path:ko04710;path:ko04910;path:ko04920;path:ko04921;path:ko04922;path:ko04931;path:ko04932;path:ko05410
c40443_g1	104.66	10.72	-3.28	1.25e-10	2.07e-08	yes	down	K09264	K09264	_
c9192_g2	0.02	3.26	4.82	1.27e-10	2.09e-08	yes	up	_	_	_
c50980_g1	13.39	0.38	-4.81	1.3e-10	2.13e-08	yes	down	_	_	_
c56118_g2	36.77	0.11	-7.47	1.41e-10	2.3e-08	yes	down	_	_	_
c61529_g1	10.98	99.71	3.17	1.46e-10	2.37e-08	yes	up	_	_	_
c68327_g1	1.36	22.07	3.93	1.47e-10	2.37e-08	yes	up	_	_	_
c71178_g1	0.26	25.09	6.13	1.49e-10	2.39e-08	yes	up	K00121	frmA, ADH5, adhC	path:ko00010;path:ko00071;path:ko00350;path:ko00625;path:ko00626;path:ko00680;path:ko00830;path:ko00980;path:ko00982;path:ko01100;path:ko01110;path:ko01120;path:ko01130;path:ko01200;path:ko01220;path:ko05204
c57832_g1	466.76	5.39	-6.41	1.55e-10	2.47e-08	yes	down	_	_	_
c9047_g1	1.78	60.4	5.01	1.57e-10	2.5e-08	yes	up	_	_	_
c59832_g1	57.32	0.55	-6.45	1.62e-10	2.56e-08	yes	down	_	_	_
c45543_g5	37.04	3.32	-3.44	1.7e-10	2.68e-08	yes	down	_	_	_
c62191_g1	0.05	4.45	4.89	1.98e-10	3.11e-08	yes	up	K15401	CYP86A1	path:ko00073
c976_g1	59.01	0	-9.21	2.01e-10	3.14e-08	yes	down	_	_	_
c53789_g1	17.34	538.43	4.95	2.03e-10	3.14e-08	yes	up	_	_	_
c38751_g1	12.95	0.37	-4.81	2.04e-10	3.15e-08	yes	down	K07192	FLOT	path:ko04910
c66219_g3	0	10.83	6.77	2.31e-10	3.55e-08	yes	up	_	_	_
c101987_g1	6.65	0.45	-3.63	2.32e-10	3.55e-08	yes	down	_	_	_
c5832_g2	24.69	0.27	-6.08	2.43e-10	3.7e-08	yes	down	_	_	_
c62206_g5	0.53	59.61	6.56	2.44e-10	3.7e-08	yes	up	_	_	_
c67944_g6	26.35	217.74	3.04	2.54e-10	3.82e-08	yes	up	_	_	_
c69371_g1	40.39	4.18	-3.24	2.55e-10	3.82e-08	yes	down	K13126	PABPC	path:ko03013;path:ko03015;path:ko03018
c47171_g1	0.15	4.64	4.26	2.61e-10	3.9e-08	yes	up	_	_	_
c65312_g1	44.9	5.74	-2.95	2.71e-10	4.03e-08	yes	down	K15920	XYL4	path:ko00500;path:ko00520;path:ko01100
c71338_g5	0.05	30.21	7.63	2.87e-10	4.24e-08	yes	up	_	_	_
c53828_g2	3193.41	43.29	-6.2	2.95e-10	4.34e-08	yes	down	K08059	IFI30, GILT	path:ko04612
c7022_g1	285.57	11.31	-4.65	2.96e-10	4.34e-08	yes	down	_	_	_
c66583_g1	2.81	0.04	-4.39	3.24e-10	4.73e-08	yes	down	_	_	_
c71522_g4	45.5	2.81	-3.97	4.29e-10	6.23e-08	yes	down	K09422	MYBP	_
c65732_g1	55.48	7.63	-2.85	4.32e-10	6.24e-08	yes	down	K00789	metK	path:ko00270;path:ko01100;path:ko01110;path:ko01230
c41916_g1	0.09	4.37	4.57	4.38e-10	6.3e-08	yes	up	_	_	_
c49629_g1	32.07	0.23	-6.59	4.51e-10	6.46e-08	yes	down	_	_	_
c71083_g1	7.77	1230.6	7.29	4.81e-10	6.85e-08	yes	up	_	_	_
c70305_g3	0.02	22.19	7.54	5.12e-10	7.26e-08	yes	up	_	_	_
c37199_g3	0.3	27.92	6.14	5.15e-10	7.27e-08	yes	up	_	_	_
c28783_g1	121.03	3.75	-4.98	5.21e-10	7.33e-08	yes	down	K03294	TC.APA	_
c68152_g3	0.02	6.37	5.7	5.23e-10	7.33e-08	yes	up	_	_	_
c69841_g4	0.31	20.38	5.65	5.38e-10	7.51e-08	yes	up	_	_	_
c65790_g1	112.52	0	-10.14	5.44e-10	7.56e-08	yes	down	_	_	_
c112647_g1	31.84	1.19	-4.63	5.72e-10	7.91e-08	yes	down	_	_	_
c44008_g1	2.17	79.69	5.13	5.8e-10	7.98e-08	yes	up	K08232	E1.6.5.4	path:ko00053;path:ko01100
c67172_g1	12.72	313.92	4.61	5.87e-10	8.05e-08	yes	up	K01051	E3.1.1.11	path:ko00040;path:ko00500;path:ko01100
c67330_g1	45.12	0.9	-5.5	6.07e-10	8.28e-08	yes	down	_	_	_
c70169_g1	15.93	1.54	-3.29	6.2e-10	8.42e-08	yes	down	K18932	ZDHHC	_
c59398_g2	17.07	0.2	-5.84	6.54e-10	8.85e-08	yes	down	_	_	_
c8270_g1	8.86	0.24	-4.71	6.66e-10	8.97e-08	yes	down	K16297	SCPL-II	_
c16158_g1	2816.05	21.23	-7.04	6.71e-10	9e-08	yes	down	_	_	_
c32407_g1	0.03	71.69	9.06	6.74e-10	9e-08	yes	up	_	_	_
c63424_g2	1201.65	2.99	-8.6	6.81e-10	9.05e-08	yes	down	K01183	E3.2.1.14	path:ko00520;path:ko01100
c68293_g1	16.09	144.04	3.15	7.02e-10	9.3e-08	yes	up	_	_	_
c61468_g2	0	17.09	7.38	7.51e-10	9.9e-08	yes	up	_	_	_
c48962_g1	0.37	15.62	5.05	7.69e-10	1.01e-07	yes	up	_	_	_
c34984_g1	0.21	59.3	7.6	8.11e-10	1.06e-07	yes	up	_	_	_
c2640_g1	0.5	65.99	6.78	8.37e-10	1.09e-07	yes	up	_	_	_
c81194_g1	9.84	0	-6.64	8.66e-10	1.12e-07	yes	down	K07198	PRKAA, AMPK	path:ko04068;path:ko04140;path:ko04150;path:ko04151;path:ko04152;path:ko04211;path:ko04213;path:ko04710;path:ko04910;path:ko04920;path:ko04921;path:ko04922;path:ko04931;path:ko04932;path:ko05410
c69216_g2	0.35	39.5	6.45	9.24e-10	1.19e-07	yes	up	_	_	_
c51759_g1	79.93	1537.51	4.26	9.43e-10	1.21e-07	yes	up	_	_	_
c67916_g1	3.16	71.79	4.46	9.79e-10	1.25e-07	yes	up	_	_	_
c69641_g1	7.33	59.68	3.01	1.05e-09	1.34e-07	yes	up	_	_	_
c30301_g1	253.65	0	-11.31	1.06e-09	1.35e-07	yes	down	_	_	_
c49589_g1	0	13.99	7.14	1.08e-09	1.36e-07	yes	up	_	_	_
c36566_g2	0	7.84	6.31	1.09e-09	1.38e-07	yes	up	K10742	DNA2	path:ko03030
c69474_g3	0.46	23.51	5.4	1.11e-09	1.4e-07	yes	up	_	_	_
c40744_g2	15.58	0.75	-4.21	1.12e-09	1.41e-07	yes	down	K01188	E3.2.1.21	path:ko00460;path:ko00500;path:ko00940;path:ko01100;path:ko01110
c40634_g1	878.23	96.33	-3.19	1.15e-09	1.44e-07	yes	down	_	_	_
c64560_g1	1.24	21.49	4.01	1.16e-09	1.44e-07	yes	up	_	_	_
c64837_g3	3.26	33.21	3.31	1.19e-09	1.47e-07	yes	up	_	_	_
c71360_g2	89.61	1.18	-6.13	1.24e-09	1.53e-07	yes	down	_	_	_
c68597_g2	7.74	63.56	3.02	1.28e-09	1.57e-07	yes	up	K05747	WAS	path:ko04062;path:ko04144;path:ko04520;path:ko04666;path:ko04810;path:ko05100;path:ko05130;path:ko05131;path:ko05132;path:ko05231
c55890_g3	24.92	0.58	-5.2	1.32e-09	1.61e-07	yes	down	_	_	_
c64275_g3	97.57	6.46	-3.9	1.32e-09	1.61e-07	yes	down	_	_	_
c49178_g1	180.09	8.59	-4.37	1.32e-09	1.61e-07	yes	down	_	_	_
c70307_g5	0	8	6.34	1.42e-09	1.71e-07	yes	up	K13148	CPSF3L, INTS11	_
c51872_g1	3.22	49.23	3.89	1.47e-09	1.77e-07	yes	up	K01761	E4.4.1.11	path:ko00270;path:ko00450
c62003_g2	21.23	0.08	-6.87	1.53e-09	1.83e-07	yes	down	_	_	_
c59620_g1	0.13	7.57	5.05	1.56e-09	1.86e-07	yes	up	K09285	OVM, ANT	_
c71627_g2	9.76	0.81	-3.44	1.7e-09	2.02e-07	yes	down	K14504	TCH4	path:ko04075
c68885_g4	0.04	37.69	8.12	1.76e-09	2.08e-07	yes	up	K05909	E1.10.3.2	_
c50932_g1	52.68	1.41	-5.12	1.78e-09	2.1e-07	yes	down	K08912	LHCB1	path:ko00196;path:ko01100
c67355_g5	0.05	25.13	7.41	1.86e-09	2.19e-07	yes	up	_	_	_
c61105_g1	0	9.19	6.54	1.99e-09	2.33e-07	yes	up	_	_	_
c71257_g1	40.82	3.2	-3.63	2.02e-09	2.36e-07	yes	down	_	_	_
c31823_g2	51.09	6.74	-2.9	2.04e-09	2.38e-07	yes	down	K01792	E5.1.3.15	path:ko00010;path:ko01100;path:ko01110;path:ko01120;path:ko01130
c101723_g1	24.67	4.14	-2.55	2.06e-09	2.39e-07	yes	down	K15283	SLC35E1	_
c69955_g2	5.06	125.88	4.61	2.08e-09	2.4e-07	yes	up	K18592	GGT1_5	path:ko00430;path:ko00460;path:ko00480;path:ko00590;path:ko01100
c62227_g2	8.67	0.23	-4.75	2.08e-09	2.4e-07	yes	down	_	_	_
c69474_g2	0.19	18.09	5.99	2.1e-09	2.41e-07	yes	up	_	_	_
c43865_g1	22.14	1.88	-3.49	2.13e-09	2.43e-07	yes	down	_	_	_
c42287_g1	2.32	34.04	3.82	2.23e-09	2.54e-07	yes	up	K10663	ATL4	_
c70175_g5	270.37	13.03	-4.36	2.28e-09	2.58e-07	yes	down	K09646	SCPEP1	_
c31659_g1	0.07	3.36	4.37	2.28e-09	2.58e-07	yes	up	K15397	KCS	path:ko00062;path:ko01110
c57608_g1	2.88	91.58	4.94	2.32e-09	2.61e-07	yes	up	_	_	_
c52387_g4	16.98	0.12	-6.3	2.32e-09	2.61e-07	yes	down	K00128	E1.2.1.3	path:ko00010;path:ko00040;path:ko00053;path:ko00071;path:ko00280;path:ko00310;path:ko00330;path:ko00340;path:ko00380;path:ko00410;path:ko00561;path:ko00620;path:ko00625;path:ko00903;path:ko01100;path:ko01110;path:ko01120;path:ko01130
c48889_g1	67.45	2.08	-4.96	2.61e-09	2.92e-07	yes	down	_	_	_
c66506_g2	1.14	23.92	4.28	2.71e-09	3.02e-07	yes	up	K14486	K14486, ARF	path:ko04075
c25739_g1	5.01	0	-5.67	2.92e-09	3.25e-07	yes	down	_	_	_
c102081_g1	122.81	3.13	-5.25	2.96e-09	3.27e-07	yes	down	_	_	_
c68369_g1	3.82	0.12	-4.15	2.97e-09	3.28e-07	yes	down	K01179	E3.2.1.4	path:ko00500;path:ko01100
c70385_g1	0.32	17.27	5.36	2.99e-09	3.29e-07	yes	up	_	_	_
c71128_g5	36.96	595.3	4.01	3.09e-09	3.38e-07	yes	up	_	_	_
c57357_g1	398.16	39.75	-3.32	3.26e-09	3.56e-07	yes	down	_	_	_
c55759_g1	2.08	57.71	4.73	3.28e-09	3.56e-07	yes	up	_	_	_
c60479_g1	18.61	1.61	-3.45	3.78e-09	4.1e-07	yes	down	_	_	_
c58210_g2	0.84	61.02	6.02	3.8e-09	4.1e-07	yes	up	K07437	CYP26A	path:ko00830;path:ko01100
c57449_g2	0.8	21.67	4.59	3.8e-09	4.1e-07	yes	up	_	_	_
c69942_g1	0	8.28	6.39	3.9e-09	4.19e-07	yes	up	_	_	_
c41130_g1	424.3	0	-12.05	4.15e-09	4.44e-07	yes	down	_	_	_
c66546_g1	27.25	5.37	-2.32	4.17e-09	4.45e-07	yes	down	K07198	PRKAA, AMPK	path:ko04068;path:ko04140;path:ko04150;path:ko04151;path:ko04152;path:ko04211;path:ko04213;path:ko04710;path:ko04910;path:ko04920;path:ko04921;path:ko04922;path:ko04931;path:ko04932;path:ko05410
c46017_g1	34.08	314.25	3.2	4.19e-09	4.45e-07	yes	up	_	_	_
c71322_g1	0.08	6.58	5.23	4.26e-09	4.51e-07	yes	up	K13148	CPSF3L, INTS11	_
c65498_g1	0.83	59.78	6.01	4.5e-09	4.74e-07	yes	up	_	_	_
c60022_g1	0.04	14.96	6.76	4.51e-09	4.74e-07	yes	up	_	_	_
c67698_g2	17.7	0.67	-4.54	4.57e-09	4.79e-07	yes	down	_	_	_
c8311_g1	6.31	0.19	-4.45	4.81e-09	5.02e-07	yes	down	K00430	E1.11.1.7	path:ko00940;path:ko01100;path:ko01110
c62086_g1	9.02	0.27	-4.61	4.82e-09	5.02e-07	yes	down	K09286	EREBP	_
c101620_g1	0	54.29	9.09	5.05e-09	5.23e-07	yes	up	_	_	_
c41172_g1	0.6	19.24	4.79	5.05e-09	5.23e-07	yes	up	_	_	_
c62670_g1	1.05	30.74	4.74	5.09e-09	5.25e-07	yes	up	K08241	E2.1.1.141	path:ko00592;path:ko01110
c61527_g2	3.64	57.84	3.95	5.16e-09	5.3e-07	yes	up	K17470	SULTR1	_
c4729_g1	0	26.39	8.05	5.23e-09	5.35e-07	yes	up	K11294	NCL, NSR1	path:ko05130
c70729_g3	0.04	9.49	6.06	5.48e-09	5.58e-07	yes	up	_	_	_
c12581_g1	205.06	9.52	-4.41	5.49e-09	5.58e-07	yes	down	_	_	_
c65261_g1	9.88	1.16	-2.99	5.5e-09	5.58e-07	yes	down	_	_	_
c67087_g8	3.64	91.95	4.62	5.81e-09	5.88e-07	yes	up	_	_	_
c56841_g1	53.87	0.33	-6.98	5.88e-09	5.93e-07	yes	down	_	_	_
c29016_g1	0	5.59	5.83	6.01e-09	6.04e-07	yes	up	_	_	_
c32324_g1	33.79	0.9	-5.08	6.1e-09	6.11e-07	yes	down	K00108	betA, CHDH	path:ko00260;path:ko01100
c109514_g1	6.32	0	-6	6.23e-09	6.22e-07	yes	down	_	_	_
c1518_g1	10.07	96.52	3.25	6.31e-09	6.26e-07	yes	up	_	_	_
c70468_g1	7.78	256.57	5.02	6.31e-09	6.26e-07	yes	up	_	_	_
c69179_g1	0.06	13.59	6.46	6.38e-09	6.31e-07	yes	up	_	_	_
c66383_g1	15.56	0.16	-5.9	6.43e-09	6.34e-07	yes	down	_	_	_
c70229_g1	7.02	93.21	3.71	6.7e-09	6.59e-07	yes	up	_	_	_
c64944_g2	22.48	2.17	-3.31	6.79e-09	6.65e-07	yes	down	K07904	RAB11A	path:ko04144;path:ko04961;path:ko04962;path:ko04972
c56154_g1	16.26	2.29	-2.78	6.86e-09	6.7e-07	yes	down	K08235	E2.4.1.207	_
c46424_g1	125.62	0	-10.3	7.05e-09	6.86e-07	yes	down	_	_	_
c68668_g8	0	14.91	7.23	7.11e-09	6.89e-07	yes	up	_	_	_
c67370_g1	59.51	7.49	-2.97	7.12e-09	6.89e-07	yes	down	_	_	_
c61209_g2	0.2	9.26	4.99	7.25e-09	7e-07	yes	up	_	_	_
c54943_g1	0.43	23.63	5.48	7.31e-09	7.04e-07	yes	up	_	_	_
c20723_g1	39.1	0	-8.61	7.46e-09	7.15e-07	yes	down	_	_	_
c68221_g6	361.62	46.23	-2.96	7.49e-09	7.16e-07	yes	down	K14490	AHP	path:ko04075
c68434_g2	146.01	24.36	-2.58	7.52e-09	7.17e-07	yes	down	K07375	TUBB	path:ko04145;path:ko04540;path:ko05130
c66060_g1	2.94	0	-4.93	8.07e-09	7.67e-07	yes	down	_	_	_
c38259_g1	2.45	139.83	5.78	8.81e-09	8.35e-07	yes	up	_	_	_
c70692_g1	13.1	107.09	3.02	8.91e-09	8.42e-07	yes	up	K15190	MEPCE, BCDIN3	_
c70307_g4	0.07	18.65	6.77	9.01e-09	8.48e-07	yes	up	_	_	_
c61711_g2	6.2	39.98	2.67	9.03e-09	8.48e-07	yes	up	_	_	_
c70729_g6	0	8.76	6.47	9.16e-09	8.58e-07	yes	up	_	_	_
c69979_g1	1.81	25.42	3.74	9.42e-09	8.8e-07	yes	up	_	_	_
c70461_g3	0.02	9.54	6.36	9.68e-09	9.01e-07	yes	up	K10844	ERCC2, XPD	path:ko03022;path:ko03420
c65286_g2	4.51	32.38	2.82	9.73e-09	9.03e-07	yes	up	_	_	_
c65644_g2	3.63	42.02	3.5	9.81e-09	9.08e-07	yes	up	_	_	_
c71218_g2	18.32	0.24	-5.76	9.91e-09	9.14e-07	yes	down	K05658	ABCB1	path:ko02010;path:ko04976;path:ko05206
c29561_g1	58.56	0	-9.2	9.98e-09	9.18e-07	yes	down	_	_	_
c48365_g1	66.82	6.98	-3.24	1.02e-08	9.37e-07	yes	down	K08242	E2.1.1.143	path:ko00100;path:ko01110
c67076_g3	4.42	0	-5.5	1.04e-08	9.48e-07	yes	down	_	_	_
c68819_g2	1.84	47.25	4.61	1.05e-08	9.53e-07	yes	up	K15400	HHT1	path:ko00073
c47308_g1	499.97	0	-12.29	1.05e-08	9.57e-07	yes	down	_	_	_
c4003_g1	42.05	0.09	-7.82	1.06e-08	9.65e-07	yes	down	_	_	_
c65128_g1	37.44	944.82	4.65	1.08e-08	9.73e-07	yes	up	K00430	E1.11.1.7	path:ko00940;path:ko01100;path:ko01110
c70950_g2	0.67	40.11	5.72	1.08e-08	9.75e-07	yes	up	K07407	E3.2.1.22B, galA, rafA	path:ko00052;path:ko00561;path:ko00600;path:ko00603
c69841_g1	2.32	196.03	6.34	1.08e-08	9.75e-07	yes	up	_	_	_
c69636_g8	0.01	38.35	8.39	1.1e-08	9.83e-07	yes	up	_	_	_
c108669_g1	41.71	406.43	3.28	1.1e-08	9.87e-07	yes	up	K10576	UBE2H, UBC8	path:ko04120
c71929_g1	2.22	59.08	4.67	1.11e-08	9.92e-07	yes	up	_	_	_
c70765_g3	6.25	0.5	-3.39	1.12e-08	9.96e-07	yes	down	_	_	_
c51538_g1	0.03	6.29	5.67	1.13e-08	1e-06	yes	up	K06067	HDAC1_2	path:ko04110;path:ko04213;path:ko04330;path:ko04919;path:ko05016;path:ko05034;path:ko05169;path:ko05200;path:ko05202;path:ko05203;path:ko05220
c52594_g2	0.11	10.79	5.68	1.15e-08	1.02e-06	yes	up	_	_	_
c71822_g4	11.61	0	-6.87	1.17e-08	1.03e-06	yes	down	_	_	_
c68287_g1	24.36	321.7	3.72	1.22e-08	1.07e-06	yes	up	_	_	_
c71810_g2	0	6.34	6.01	1.23e-08	1.08e-06	yes	up	_	_	_
c64838_g1	0.69	9.89	3.66	1.27e-08	1.11e-06	yes	up	K08867	WNK, PRKWNK	_
c30303_g1	0	485.26	12.24	1.32e-08	1.15e-06	yes	up	_	_	_
c68356_g1	0.12	17.15	6.28	1.39e-08	1.21e-06	yes	up	_	_	_
c39950_g1	0.07	4.49	4.74	1.4e-08	1.21e-06	yes	up	_	_	_
c26085_g1	283.16	28.59	-3.3	1.44e-08	1.25e-06	yes	down	_	_	_
c71455_g6	0.49	8.27	3.82	1.46e-08	1.26e-06	yes	up	_	_	_
c26543_g1	7.38	127.61	4.09	1.48e-08	1.27e-06	yes	up	_	_	_
c62251_g1	45.08	1.03	-5.32	1.5e-08	1.29e-06	yes	down	_	_	_
c70629_g1	3.02	41.28	3.73	1.51e-08	1.29e-06	yes	up	K02575	NRT, narK, nrtP, nasA	path:ko00910
c65991_g2	0.21	11.48	5.22	1.51e-08	1.29e-06	yes	up	_	_	_
c63035_g1	0.04	13.64	6.61	1.52e-08	1.29e-06	yes	up	_	_	_
c70470_g2	0.98	13.24	3.63	1.53e-08	1.3e-06	yes	up	K02552	menF	path:ko00130;path:ko01053;path:ko01100;path:ko01110;path:ko01130
c57071_g2	17.26	1.23	-3.7	1.58e-08	1.34e-06	yes	down	K13066	E2.1.1.68, COMT	path:ko00940;path:ko01100;path:ko01110
c19078_g1	0.38	12.4	4.7	1.66e-08	1.4e-06	yes	up	_	_	_
c36941_g1	8.6	0.26	-4.58	1.66e-08	1.4e-06	yes	down	K02639	petF	path:ko00195
c57984_g1	12.27	125.87	3.35	1.68e-08	1.4e-06	yes	up	_	_	_
c68957_g2	8.87	0.58	-3.72	1.68e-08	1.4e-06	yes	down	_	_	_
c71237_g2	0.04	51.38	8.52	1.68e-08	1.4e-06	yes	up	_	_	_
c60157_g3	0	4.68	5.58	1.72e-08	1.43e-06	yes	up	_	_	_
c65689_g2	0.05	15.55	6.72	1.73e-08	1.43e-06	yes	up	_	_	_
c40312_g1	16.5	0.87	-4.09	1.73e-08	1.43e-06	yes	down	K09287	RAV	_
c69562_g1	6.08	46.46	2.91	1.74e-08	1.44e-06	yes	up	K01870	IARS, ileS	path:ko00970
c52425_g1	14.01	0.04	-6.7	1.77e-08	1.45e-06	yes	down	_	_	_
c68387_g2	0.08	5.48	4.93	1.77e-08	1.45e-06	yes	up	_	_	_
c62583_g1	272.45	26.8	-3.34	1.78e-08	1.45e-06	yes	down	_	_	_
c46067_g1	6.4	83.2	3.68	1.78e-08	1.45e-06	yes	up	_	_	_
c67742_g2	24.22	2.61	-3.17	1.78e-08	1.45e-06	yes	down	K18195	RGL4, rhiE	_
c56495_g1	218.49	0	-11.09	1.8e-08	1.46e-06	yes	down	_	_	_
c70502_g4	28.62	5.47	-2.37	1.85e-08	1.5e-06	yes	down	_	_	_
c62725_g1	0.09	4.48	4.58	1.91e-08	1.55e-06	yes	up	_	_	_
c62936_g2	3288.91	118.81	-4.79	1.94e-08	1.56e-06	yes	down	_	_	_
c36774_g1	3.25	39.88	3.58	1.95e-08	1.57e-06	yes	up	K10257	FAD8, desB	path:ko01040;path:ko01212
c65685_g4	0.39	176.96	8.49	1.98e-08	1.59e-06	yes	up	_	_	_
c59217_g1	0.04	5.77	5.34	2.09e-08	1.67e-06	yes	up	_	_	_
c65747_g1	1.97	47.4	4.52	2.1e-08	1.68e-06	yes	up	_	_	_
c70271_g1	13.77	0.49	-4.55	2.11e-08	1.68e-06	yes	down	_	_	_
c57289_g1	286.54	50.9	-2.49	2.16e-08	1.72e-06	yes	down	K00208	fabI	path:ko00061;path:ko00780;path:ko01100;path:ko01212
c57685_g2	28.33	0.95	-4.75	2.2e-08	1.74e-06	yes	down	K13508	GPAT	path:ko00561;path:ko00564;path:ko01100;path:ko01110
c68791_g3	5.23	126.12	4.57	2.26e-08	1.79e-06	yes	up	_	_	_
c9127_g1	0	3.81	5.29	2.33e-08	1.84e-06	yes	up	K14846	RPF1	_
c68152_g1	0.02	6.67	5.83	2.4e-08	1.89e-06	yes	up	_	_	_
c71095_g7	35.23	1.49	-4.47	2.44e-08	1.92e-06	yes	down	_	_	_
c63499_g2	0	4.1	5.39	2.48e-08	1.95e-06	yes	up	_	_	_
c74025_g1	20.66	0.36	-5.48	2.49e-08	1.95e-06	yes	down	_	_	_
c69002_g1	27.43	5.21	-2.38	2.5e-08	1.95e-06	yes	down	_	_	_
c62430_g1	14.97	0.08	-6.41	2.51e-08	1.95e-06	yes	down	K15397	KCS	path:ko00062;path:ko01110
c62152_g1	12.62	0.25	-5.16	2.56e-08	1.99e-06	yes	down	_	_	_
c48836_g1	0	29.69	8.22	2.6e-08	2.01e-06	yes	up	_	_	_
c69902_g1	0.05	4.5	4.95	2.69e-08	2.08e-06	yes	up	_	_	_
c70948_g7	0.18	22.25	6.33	2.77e-08	2.13e-06	yes	up	_	_	_
c51207_g1	0	18.43	7.53	2.77e-08	2.13e-06	yes	up	_	_	_
c68171_g1	22.36	3.17	-2.78	2.8e-08	2.14e-06	yes	down	_	_	_
c56118_g1	34.28	0.19	-6.9	2.81e-08	2.14e-06	yes	down	_	_	_
c71542_g1	0.11	6.15	4.91	2.84e-08	2.17e-06	yes	up	_	_	_
c70291_g1	83.84	16.22	-2.36	2.88e-08	2.19e-06	yes	down	K11991	tadA	_
c67569_g1	5.92	0.08	-5.05	2.97e-08	2.26e-06	yes	down	_	_	_
c38814_g1	12.58	177.89	3.81	3e-08	2.27e-06	yes	up	_	_	_
c71644_g1	12.14	180.57	3.88	3.05e-08	2.3e-06	yes	up	K00422	E1.10.3.1	path:ko00350;path:ko00950;path:ko01100;path:ko01110
c65866_g6	0.25	15.65	5.49	3.09e-08	2.32e-06	yes	up	_	_	_
c65627_g8	15.76	0.15	-5.97	3.09e-08	2.32e-06	yes	down	_	_	_
c52094_g1	0	5.48	5.8	3.12e-08	2.34e-06	yes	up	_	_	_
c71522_g2	1.76	137.09	6.2	3.42e-08	2.56e-06	yes	up	K09422	MYBP	_
c67644_g2	0.04	4.47	4.99	3.48e-08	2.6e-06	yes	up	_	_	_
c95003_g1	12.98	1.31	-3.21	3.5e-08	2.61e-06	yes	down	_	_	_
c52455_g1	9.36	1.07	-3.02	3.54e-08	2.63e-06	yes	down	_	_	_
c66175_g1	680.29	123.54	-2.46	3.59e-08	2.66e-06	yes	down	_	_	_
c23878_g1	0.1	3.63	4.21	3.66e-08	2.7e-06	yes	up	_	_	_
c8270_g2	15.69	0	-7.3	3.67e-08	2.7e-06	yes	down	K16297	SCPL-II	_
c71286_g3	0.9	9.93	3.33	3.99e-08	2.94e-06	yes	up	_	_	_
c59518_g1	0	9.89	6.64	4.02e-08	2.95e-06	yes	up	_	_	_
c64572_g1	19.79	4.34	-2.16	4.06e-08	2.98e-06	yes	down	K05929	E2.1.1.103, NMT	path:ko00564
c53153_g1	0	11.54	6.86	4.09e-08	2.99e-06	yes	up	_	_	_
c24222_g1	0.12	23.02	6.69	4.16e-08	3.03e-06	yes	up	_	_	_
c69095_g1	0.7	20.76	4.71	4.23e-08	3.08e-06	yes	up	_	_	_
c83073_g1	0.98	20.25	4.24	4.43e-08	3.22e-06	yes	up	K14496	PYL	path:ko04075
c52129_g1	13.27	0.83	-3.84	4.45e-08	3.22e-06	yes	down	_	_	_
c60714_g1	0.02	7.28	5.95	4.47e-08	3.23e-06	yes	up	_	_	_
c63714_g1	124.84	15.51	-3	4.52e-08	3.26e-06	yes	down	_	_	_
c60323_g2	7.78	49.97	2.67	4.53e-08	3.26e-06	yes	up	K01051	E3.1.1.11	path:ko00040;path:ko00500;path:ko01100
c65829_g1	0.33	20.8	5.62	4.64e-08	3.33e-06	yes	up	_	_	_
c109014_g1	167.46	16.77	-3.31	4.67e-08	3.34e-06	yes	down	_	_	_
c41677_g1	1.65	94.7	5.76	4.71e-08	3.36e-06	yes	up	_	_	_
c67126_g4	0.54	46.36	6.19	4.74e-08	3.38e-06	yes	up	K00799	GST, gst	path:ko00480;path:ko00980;path:ko00982;path:ko05204
c16463_g1	12.38	1.02	-3.48	4.81e-08	3.42e-06	yes	down	_	_	_
c59267_g1	0.43	22.52	5.42	4.94e-08	3.5e-06	yes	up	K15014	SLC29A1_2_3, ENT1_2_3	_
c67816_g1	121.33	17.06	-2.82	4.94e-08	3.5e-06	yes	down	_	_	_
c108686_g1	8.28	0.34	-4.25	4.99e-08	3.53e-06	yes	down	K02721	psbW	path:ko00195;path:ko01100
c61694_g1	31.3	4.32	-2.83	5.02e-08	3.54e-06	yes	down	_	_	_
c65433_g2	0.09	4.71	4.68	5.17e-08	3.64e-06	yes	up	_	_	_
c32117_g1	0.19	5.46	4.25	5.19e-08	3.64e-06	yes	up	K09285	OVM, ANT	_
c70769_g3	0.03	36.55	8.19	5.24e-08	3.67e-06	yes	up	K02960	RP-S16e, RPS16	path:ko03010
c70829_g5	0	5.82	5.89	5.32e-08	3.72e-06	yes	up	_	_	_
c108876_g2	0.51	29.27	5.59	5.36e-08	3.74e-06	yes	up	_	_	_
c54730_g2	5.79	0.14	-4.63	5.5e-08	3.83e-06	yes	down	_	_	_
c64096_g1	14.37	0.36	-4.99	5.68e-08	3.94e-06	yes	down	_	_	_
c62783_g1	0.03	2	3.98	5.69e-08	3.94e-06	yes	up	K06901	pbuG	_
c67286_g1	0.98	68.2	5.99	5.72e-08	3.95e-06	yes	up	K14432	ABF	path:ko04075
c70633_g3	0	21.61	7.76	5.72e-08	3.95e-06	yes	up	K01784	galE, GALE	path:ko00052;path:ko00520;path:ko01100
c44833_g1	3.09	26.7	3.07	5.78e-08	3.98e-06	yes	up	_	_	_
c44678_g1	0.66	50.08	6.05	5.81e-08	3.99e-06	yes	up	_	_	_
c60580_g1	8.68	53.34	2.6	5.93e-08	4.06e-06	yes	up	_	_	_
c57289_g2	144.63	38.35	-1.91	5.94e-08	4.06e-06	yes	down	_	_	_
c52495_g1	12.18	0.9	-3.62	5.95e-08	4.06e-06	yes	down	K08246	CPI1	path:ko00100;path:ko01100;path:ko01110
c67969_g5	25.9	237.45	3.19	6.01e-08	4.09e-06	yes	up	_	_	_
c64810_g1	70.11	589.76	3.07	6.04e-08	4.1e-06	yes	up	_	_	_
c71365_g2	1.96	27.09	3.72	6.13e-08	4.16e-06	yes	up	K01537	E3.6.3.8	_
c64155_g1	0	16.87	7.41	6.21e-08	4.2e-06	yes	up	_	_	_
c69853_g9	3.92	0.1	-4.34	6.39e-08	4.31e-06	yes	down	K12259	SMOX, PAO5	path:ko00330;path:ko00410
c40177_g1	18.22	1.37	-3.64	6.42e-08	4.32e-06	yes	down	_	_	_
c96103_g1	0	3.9	5.32	6.43e-08	4.32e-06	yes	up	_	_	_
c57620_g1	0.81	25.16	4.79	6.45e-08	4.33e-06	yes	up	_	_	_
c71271_g1	3.8	59.41	3.93	6.5e-08	4.35e-06	yes	up	_	_	_
c67126_g2	6.73	210.07	4.94	6.51e-08	4.35e-06	yes	up	K00799	GST, gst	path:ko00480;path:ko00980;path:ko00982;path:ko05204
c51463_g1	0.03	4.12	4.97	6.6e-08	4.4e-06	yes	up	_	_	_
c57456_g1	0	3.98	5.35	6.77e-08	4.5e-06	yes	up	_	_	_
c40522_g1	89.37	4.54	-4.27	6.82e-08	4.52e-06	yes	down	K00108	betA, CHDH	path:ko00260;path:ko01100
c51322_g2	0	7.55	6.26	7.43e-08	4.92e-06	yes	up	_	_	_
c47025_g1	106.92	0.36	-7.87	7.49e-08	4.95e-06	yes	down	_	_	_
c69636_g7	10.99	0.03	-6.43	7.57e-08	4.99e-06	yes	down	_	_	_
c56707_g1	539.48	37.89	-3.83	7.61e-08	5.01e-06	yes	down	K13899	CST3	path:ko04970
c66875_g3	0.15	15.38	5.96	7.64e-08	5.02e-06	yes	up	_	_	_
c49227_g2	0.25	5.24	3.93	7.73e-08	5.06e-06	yes	up	K08099	E3.1.1.14	path:ko00860;path:ko01100;path:ko01110
c53156_g2	30.49	3.07	-3.27	7.87e-08	5.15e-06	yes	down	K00517	E1.14.-.-	path:ko00363;path:ko00624;path:ko00627;path:ko00903;path:ko00945;path:ko01100;path:ko01110;path:ko01120
c45422_g1	0.03	1.3	3.47	8.21e-08	5.36e-06	yes	up	_	_	_
c59059_g1	6.83	221.41	5	8.39e-08	5.46e-06	yes	up	_	_	_
c4333_g1	1.23	28.17	4.41	8.4e-08	5.46e-06	yes	up	_	_	_
c51327_g1	0	1.72	4.18	8.41e-08	5.46e-06	yes	up	_	_	_
c70117_g1	28.65	4.04	-2.8	8.46e-08	5.47e-06	yes	down	_	_	_
c55307_g2	0	21.4	7.75	8.54e-08	5.51e-06	yes	up	_	_	_
c59428_g3	0	3.18	5.04	8.56e-08	5.51e-06	yes	up	_	_	_
c37699_g1	0.27	9.2	4.65	8.66e-08	5.57e-06	yes	up	_	_	_
c32846_g1	29.34	0	-8.2	8.91e-08	5.72e-06	yes	down	_	_	_
c49322_g1	0.22	9.73	4.95	8.94e-08	5.72e-06	yes	up	_	_	_
c66506_g1	0.79	12.26	3.8	9e-08	5.76e-06	yes	up	_	_	_
c61643_g1	197.46	19.87	-3.31	9.05e-08	5.77e-06	yes	down	_	_	_
c69439_g1	18.75	3.69	-2.31	9.45e-08	6.02e-06	yes	down	_	_	_
c66933_g1	8.29	106.65	3.67	9.53e-08	6.05e-06	yes	up	_	_	_
c21814_g1	0.86	35.71	5.23	1.01e-07	6.38e-06	yes	up	_	_	_
c63318_g1	26.5	4.54	-2.52	1.01e-07	6.38e-06	yes	down	_	_	_
c57107_g1	0.15	20.71	6.4	1.02e-07	6.43e-06	yes	up	K08241	E2.1.1.141	path:ko00592;path:ko01110
c29205_g1	0	5.55	5.82	1.05e-07	6.6e-06	yes	up	K03231	EEF1A	path:ko03013;path:ko05134
c69753_g1	0	10.57	6.74	1.05e-07	6.6e-06	yes	up	K00276	AOC3, AOC2, tynA	path:ko00260;path:ko00350;path:ko00360;path:ko00410;path:ko00950;path:ko00960;path:ko01100;path:ko01110
c55996_g2	22.73	163.33	2.84	1.05e-07	6.6e-06	yes	up	K00522	FTH1	path:ko04978
c57890_g2	150.72	30.65	-2.29	1.07e-07	6.72e-06	yes	down	K01623	ALDO	path:ko00010;path:ko00030;path:ko00051;path:ko00680;path:ko00710;path:ko01100;path:ko01110;path:ko01120;path:ko01130;path:ko01200;path:ko01230
c54795_g2	4648.82	227.65	-4.35	1.08e-07	6.78e-06	yes	down	K08059	IFI30, GILT	path:ko04612
c71723_g3	0	80.55	9.66	1.09e-07	6.8e-06	yes	up	_	_	_
c68026_g5	0	24.41	7.94	1.09e-07	6.8e-06	yes	up	_	_	_
c65656_g3	0	13.21	7.06	1.1e-07	6.82e-06	yes	up	_	_	_
c55675_g1	0	11.45	6.85	1.13e-07	6.98e-06	yes	up	_	_	_
c63907_g1	1.32	17.91	3.66	1.13e-07	6.98e-06	yes	up	_	_	_
c69305_g1	29	4.47	-2.67	1.15e-07	7.08e-06	yes	down	K15920	XYL4	path:ko00500;path:ko00520;path:ko01100
c61524_g1	20.49	168.55	3.03	1.16e-07	7.18e-06	yes	up	_	_	_
c68910_g1	10.56	80.95	2.93	1.17e-07	7.21e-06	yes	up	_	_	_
c59867_g1	27.89	745.49	4.74	1.17e-07	7.21e-06	yes	up	K06910	K06910	_
c63972_g1	0.24	6.21	4.21	1.18e-07	7.22e-06	yes	up	K01728	pel	path:ko00040
c36553_g1	0.17	20.9	6.26	1.18e-07	7.23e-06	yes	up	K15397	KCS	path:ko00062;path:ko01110
c69211_g2	2.26	19.53	3.05	1.26e-07	7.71e-06	yes	up	_	_	_
c65010_g1	68.46	1.28	-5.64	1.27e-07	7.72e-06	yes	down	_	_	_
c69185_g2	0.02	3.82	5.02	1.27e-07	7.73e-06	yes	up	_	_	_
c62455_g2	2.03	0	-4.41	1.27e-07	7.74e-06	yes	down	_	_	_
c69982_g1	12.24	2.24	-2.4	1.28e-07	7.74e-06	yes	down	_	_	_
c69566_g1	24.64	189.14	2.94	1.3e-07	7.86e-06	yes	up	_	_	_
c59991_g1	26.43	2.71	-3.24	1.3e-07	7.88e-06	yes	down	_	_	_
c43894_g1	6.18	69.08	3.46	1.33e-07	8e-06	yes	up	_	_	_
c70830_g3	0.04	3.88	4.84	1.34e-07	8.03e-06	yes	up	_	_	_
c50011_g1	8.51	58.22	2.76	1.34e-07	8.03e-06	yes	up	K01489	cdd, CDA	path:ko00240;path:ko00983;path:ko01100
c68466_g2	89.71	5.83	-3.92	1.35e-07	8.12e-06	yes	down	_	_	_
c71627_g1	20.23	3.37	-2.55	1.42e-07	8.51e-06	yes	down	K14504	TCH4	path:ko04075
c68597_g3	12.15	363.09	4.89	1.43e-07	8.56e-06	yes	up	_	_	_
c24138_g1	0	2.75	4.83	1.46e-07	8.7e-06	yes	up	K06268	PPP3R, CNB	path:ko04010;path:ko04020;path:ko04022;path:ko04114;path:ko04310;path:ko04360;path:ko04370;path:ko04380;path:ko04650;path:ko04660;path:ko04662;path:ko04720;path:ko04724;path:ko04921;path:ko04922;path:ko04924;path:ko05010;path:ko05014;path:ko05031;path:ko05152;path:ko05166
c25446_g1	68.51	16.51	-2.05	1.47e-07	8.74e-06	yes	down	_	_	_
c42703_g1	1128.55	117.47	-3.26	1.47e-07	8.75e-06	yes	down	_	_	_
c66228_g1	8.05	62.92	2.95	1.49e-07	8.83e-06	yes	up	_	_	_
c41332_g1	0.38	25.24	5.72	1.5e-07	8.88e-06	yes	up	_	_	_
c103323_g1	0	61.08	9.26	1.55e-07	9.14e-06	yes	up	_	_	_
c69418_g1	44.79	8.09	-2.45	1.57e-07	9.27e-06	yes	down	_	_	_
c45664_g1	52.39	7.43	-2.8	1.63e-07	9.6e-06	yes	down	_	_	_
c79424_g1	58.03	10.86	-2.41	1.63e-07	9.6e-06	yes	down	K01695	trpA	path:ko00260;path:ko00400;path:ko01100;path:ko01110;path:ko01130;path:ko01230
c52440_g1	136.34	1347.83	3.3	1.68e-07	9.83e-06	yes	up	K16281	RHA1	_
c60825_g1	32.45	1.6	-4.26	1.68e-07	9.83e-06	yes	down	K00434	E1.11.1.11	path:ko00053;path:ko00480
c66018_g1	12.06	0.83	-3.71	1.69e-07	9.86e-06	yes	down	_	_	_
c61718_g1	2.58	154.31	5.85	1.77e-07	1.03e-05	yes	up	K01953	asnB, ASNS	path:ko00250;path:ko01100;path:ko01110
c16482_g1	7.51	0.13	-5.04	1.83e-07	1.06e-05	yes	down	K02695	psaH	path:ko00195;path:ko01100
c55105_g1	15.42	0	-7.28	1.83e-07	1.06e-05	yes	down	_	_	_
c61207_g1	99	18.28	-2.43	1.83e-07	1.06e-05	yes	down	_	_	_
c66688_g1	0.07	5.57	5.03	1.84e-07	1.06e-05	yes	up	K01184	E3.2.1.15	path:ko00040;path:ko00500;path:ko01100
c65665_g4	2.32	0.01	-4.44	1.84e-07	1.06e-05	yes	down	K06569	MFI2	_
c50770_g1	0.55	26.13	5.34	1.89e-07	1.09e-05	yes	up	_	_	_
c63140_g1	0	2.66	4.78	1.9e-07	1.09e-05	yes	up	_	_	_
c48793_g1	25.65	3.96	-2.67	1.9e-07	1.09e-05	yes	down	_	_	_
c69159_g1	14.54	1.99	-2.81	1.92e-07	1.1e-05	yes	down	K03549	kup	_
c67368_g1	0.26	16.68	5.54	1.99e-07	1.14e-05	yes	up	K10742	DNA2	path:ko03030
c66994_g7	0.07	11.83	6.15	2.02e-07	1.15e-05	yes	up	K01303	APEH	_
c55411_g2	11.08	1.06	-3.26	2.02e-07	1.15e-05	yes	down	_	_	_
c70074_g3	0.56	10.87	4.05	2.09e-07	1.19e-05	yes	up	_	_	_
c68570_g2	0	18.15	7.51	2.17e-07	1.23e-05	yes	up	_	_	_
c46854_g1	15.92	2.96	-2.39	2.18e-07	1.24e-05	yes	down	K16732	PRC1	_
c71380_g1	0	9.13	6.53	2.2e-07	1.24e-05	yes	up	_	_	_
c19041_g1	0	7.3	6.21	2.2e-07	1.24e-05	yes	up	_	_	_
c25271_g1	3.35	33.75	3.3	2.2e-07	1.24e-05	yes	up	_	_	_
c59620_g2	0.24	5.47	4.05	2.3e-07	1.29e-05	yes	up	_	_	_
c48391_g1	0.08	33.91	7.58	2.32e-07	1.3e-05	yes	up	_	_	_
c69965_g1	2.69	0	-4.8	2.36e-07	1.32e-05	yes	down	_	_	_
c94428_g1	10.65	0.61	-3.91	2.38e-07	1.33e-05	yes	down	K02872	RP-L13Ae, RPL13A	path:ko03010
c61377_g1	0	13.19	7.05	2.4e-07	1.34e-05	yes	up	_	_	_
c53801_g1	2.05	69.27	5.01	2.4e-07	1.34e-05	yes	up	_	_	_
c71357_g6	239.56	40.38	-2.57	2.41e-07	1.34e-05	yes	down	K00430	E1.11.1.7	path:ko00940;path:ko01100;path:ko01110
c66405_g1	3.02	0.05	-4.42	2.41e-07	1.34e-05	yes	down	_	_	_
c56735_g2	0.79	18.39	4.37	2.42e-07	1.35e-05	yes	up	_	_	_
c30716_g1	45.09	531.65	3.56	2.45e-07	1.36e-05	yes	up	_	_	_
c71487_g7	1.2	25.96	4.33	2.46e-07	1.36e-05	yes	up	_	_	_
c37507_g2	0.06	2.9	4.19	2.5e-07	1.38e-05	yes	up	_	_	_
c66006_g1	0.13	7.65	5.1	2.52e-07	1.39e-05	yes	up	K05391	CNGF	path:ko04626
c67262_g1	0.53	18.1	4.85	2.53e-07	1.39e-05	yes	up	_	_	_
c64718_g4	0.39	15.88	5.01	2.54e-07	1.4e-05	yes	up	_	_	_
c41852_g1	0.7	24.1	4.92	2.56e-07	1.4e-05	yes	up	_	_	_
c60707_g1	0.11	6.11	4.86	2.58e-07	1.41e-05	yes	up	K10742	DNA2	path:ko03030
c60557_g1	3.99	0.04	-4.83	2.59e-07	1.41e-05	yes	down	K01051	E3.1.1.11	path:ko00040;path:ko00500;path:ko01100
c46768_g1	5.17	114.77	4.45	2.59e-07	1.41e-05	yes	up	_	_	_
c56519_g1	0.35	9.23	4.37	2.65e-07	1.44e-05	yes	up	_	_	_
c38702_g1	24.35	150.5	2.62	2.65e-07	1.44e-05	yes	up	K00797	speE, SRM	path:ko00270;path:ko00330;path:ko00410;path:ko00480;path:ko01100
c38875_g1	4.39	0	-5.49	2.68e-07	1.45e-05	yes	down	_	_	_
c51879_g2	9.4	105.07	3.47	2.69e-07	1.46e-05	yes	up	K15472	CYP71D55	path:ko00909
c109729_g1	0.05	18.08	6.93	2.72e-07	1.47e-05	yes	up	_	_	_
c57758_g1	0.16	7.16	4.82	2.74e-07	1.48e-05	yes	up	_	_	_
c50374_g1	38.18	5.65	-2.73	2.8e-07	1.51e-05	yes	down	_	_	_
c99351_g1	0.19	63.65	7.8	2.84e-07	1.53e-05	yes	up	_	_	_
c51564_g2	0.32	14.36	5.12	2.85e-07	1.53e-05	yes	up	_	_	_
c23535_g1	35.45	6.81	-2.36	2.87e-07	1.54e-05	yes	down	_	_	_
c61743_g1	0.35	6.02	3.77	2.9e-07	1.55e-05	yes	up	K13947	PIN	_
c90885_g1	1.59	32.4	4.26	2.91e-07	1.56e-05	yes	up	_	_	_
c87679_g1	0.03	27.23	7.73	2.96e-07	1.58e-05	yes	up	_	_	_
c69212_g4	0	10.53	6.73	2.97e-07	1.58e-05	yes	up	_	_	_
c37820_g1	75.92	0.27	-7.67	2.97e-07	1.58e-05	yes	down	_	_	_
c67472_g1	3.53	25.59	2.82	3.03e-07	1.61e-05	yes	up	_	_	_
c58915_g1	7.81	79.65	3.33	3.05e-07	1.61e-05	yes	up	_	_	_
c39202_g1	0.67	12.26	4.01	3.07e-07	1.63e-05	yes	up	_	_	_
c87290_g1	16.25	1.46	-3.39	3.1e-07	1.64e-05	yes	down	K00797	speE, SRM	path:ko00270;path:ko00330;path:ko00410;path:ko00480;path:ko01100
c62426_g1	2.2	0	-4.53	3.1e-07	1.64e-05	yes	down	_	_	_
c70320_g1	51.74	21.35	-1.27	3.16e-07	1.66e-05	yes	down	_	_	_
c55152_g3	0.06	16.52	6.7	3.17e-07	1.67e-05	yes	up	_	_	_
c68985_g1	0.9	21.82	4.45	3.18e-07	1.67e-05	yes	up	K01728	pel	path:ko00040
c71345_g1	0.13	22.14	6.6	3.22e-07	1.68e-05	yes	up	_	_	_
c67307_g3	0	5.16	5.72	3.22e-07	1.68e-05	yes	up	_	_	_
c65664_g1	15.14	2.29	-2.67	3.23e-07	1.69e-05	yes	down	_	_	_
c49477_g1	8.23	0.41	-4.04	3.24e-07	1.69e-05	yes	down	K16298	SCPL-IV	_
c69494_g1	0.06	28.16	7.51	3.31e-07	1.72e-05	yes	up	K16903	TAA1	path:ko00380;path:ko01100
c63571_g1	9.55	1.19	-2.91	3.31e-07	1.72e-05	yes	down	_	_	_
c64886_g1	9.07	58.29	2.67	3.34e-07	1.73e-05	yes	up	K15227	TYRAAT	path:ko00400;path:ko01100;path:ko01110;path:ko01230
c65270_g2	46.68	9.32	-2.31	3.34e-07	1.73e-05	yes	down	K08235	E2.4.1.207	_
c58612_g1	0	11.5	6.86	3.37e-07	1.74e-05	yes	up	_	_	_
c50450_g1	0.38	35.06	6.19	3.38e-07	1.75e-05	yes	up	_	_	_
c42624_g1	0	1.51	4.01	3.39e-07	1.75e-05	yes	up	_	_	_
c57890_g1	308.81	70.43	-2.13	3.44e-07	1.77e-05	yes	down	K01623	ALDO	path:ko00010;path:ko00030;path:ko00051;path:ko00680;path:ko00710;path:ko01100;path:ko01110;path:ko01120;path:ko01130;path:ko01200;path:ko01230
c66151_g6	0.36	23.65	5.69	3.5e-07	1.8e-05	yes	up	_	_	_
c69467_g2	11.51	145.4	3.65	3.51e-07	1.8e-05	yes	up	K03517	nadA	path:ko00760;path:ko01100
c69992_g1	0.11	6.34	4.96	3.51e-07	1.8e-05	yes	up	_	_	_
c64309_g2	0	29.77	8.22	3.58e-07	1.83e-05	yes	up	_	_	_
c70418_g1	0.63	57.8	6.31	3.6e-07	1.84e-05	yes	up	_	_	_
c11083_g1	0	0.94	3.37	3.62e-07	1.84e-05	yes	up	K02995	RP-S8e, RPS8	path:ko03010
c32449_g1	0.02	2.07	4.18	3.64e-07	1.85e-05	yes	up	K09285	OVM, ANT	_
c69841_g3	0.43	17.66	5.08	3.75e-07	1.91e-05	yes	up	_	_	_
c39699_g1	0	4.65	5.57	3.81e-07	1.93e-05	yes	up	_	_	_
c58510_g1	315.09	44.02	-2.84	3.83e-07	1.94e-05	yes	down	_	_	_
c32957_g1	0.17	16.84	5.99	3.91e-07	1.98e-05	yes	up	_	_	_
c62585_g2	6.41	0.85	-2.78	3.93e-07	1.98e-05	yes	down	_	_	_
c54730_g3	97.35	8.37	-3.52	4.06e-07	2.04e-05	yes	down	_	_	_
c62035_g1	0.08	44.83	7.93	4.06e-07	2.04e-05	yes	up	_	_	_
c62003_g1	17.21	0	-7.44	4.06e-07	2.04e-05	yes	down	_	_	_
c71764_g5	6.04	50.3	3.04	4.11e-07	2.06e-05	yes	up	K09422	MYBP	_
c68327_g5	20.58	0.92	-4.34	4.18e-07	2.09e-05	yes	down	K16296	SCPL-I	_
c56341_g1	6.38	1.04	-2.51	4.24e-07	2.12e-05	yes	down	_	_	_
c68431_g1	4.33	83.33	4.24	4.24e-07	2.12e-05	yes	up	_	_	_
c65464_g1	4.17	0	-5.42	4.31e-07	2.15e-05	yes	down	_	_	_
c62172_g1	0	1.21	3.72	4.39e-07	2.19e-05	yes	up	K09527	DNAJC7	_
c30720_g1	1.25	0.05	-3.15	4.43e-07	2.2e-05	yes	down	_	_	_
c61694_g2	14.64	0.73	-4.16	4.46e-07	2.21e-05	yes	down	_	_	_
c25892_g1	7.73	160.57	4.36	4.53e-07	2.24e-05	yes	up	_	_	_
c59324_g3	11.56	556.76	5.58	4.53e-07	2.24e-05	yes	up	K13680	CSLA	_
c68603_g1	0	6.89	6.13	4.56e-07	2.25e-05	yes	up	_	_	_
c70149_g3	0	11.15	6.81	4.57e-07	2.25e-05	yes	up	_	_	_
c38583_g1	105.04	25.75	-2.02	4.58e-07	2.25e-05	yes	down	K00627	DLAT, aceF, pdhC	path:ko00010;path:ko00020;path:ko00620;path:ko01100;path:ko01110;path:ko01120;path:ko01130;path:ko01200
c58945_g1	1.52	34.82	4.43	4.62e-07	2.27e-05	yes	up	K08232	E1.6.5.4	path:ko00053;path:ko01100
c7827_g1	0	2.27	4.56	4.64e-07	2.27e-05	yes	up	_	_	_
c39407_g1	0	13.38	7.07	4.67e-07	2.29e-05	yes	up	_	_	_
c38244_g1	0.28	5.3	3.82	4.69e-07	2.29e-05	yes	up	_	_	_
c62657_g1	0.11	3.33	4.06	4.74e-07	2.31e-05	yes	up	_	_	_
c67200_g1	7.19	0.7	-3.19	4.77e-07	2.33e-05	yes	down	_	_	_
c66808_g2	0.82	15.87	4.12	4.83e-07	2.35e-05	yes	up	_	_	_
c54165_g1	0.17	9.09	5.09	4.86e-07	2.36e-05	yes	up	_	_	_
c20052_g1	0.05	3.04	4.43	4.87e-07	2.36e-05	yes	up	_	_	_
c69918_g1	21.75	0.09	-6.88	4.89e-07	2.37e-05	yes	down	_	_	_
c49575_g2	0.05	6.98	5.57	4.9e-07	2.37e-05	yes	up	_	_	_
c64879_g1	1.1	21.25	4.15	5.15e-07	2.48e-05	yes	up	_	_	_
c52429_g1	20.56	175.18	3.08	5.16e-07	2.48e-05	yes	up	_	_	_
c69801_g3	5.28	0	-5.75	5.17e-07	2.48e-05	yes	down	_	_	_
c57033_g1	0.05	7.97	5.8	5.18e-07	2.48e-05	yes	up	_	_	_
c63602_g2	31.84	8.71	-1.86	5.18e-07	2.48e-05	yes	down	_	_	_
c101487_g1	1.96	121.55	5.88	5.18e-07	2.48e-05	yes	up	_	_	_
c108786_g1	5.71	0.47	-3.35	5.24e-07	2.51e-05	yes	down	K10529	DOX1	path:ko00592
c108919_g1	231.07	27.14	-3.09	5.24e-07	2.51e-05	yes	down	K19041	RNF38_44	_
c68817_g5	0	27.4	8.1	5.27e-07	2.51e-05	yes	up	K06061	MAML	path:ko04330
c109745_g1	0.98	57.89	5.75	5.28e-07	2.52e-05	yes	up	_	_	_
c69388_g6	5.73	55.66	3.26	5.39e-07	2.56e-05	yes	up	_	_	_
c62726_g3	0.15	3.98	4.02	5.48e-07	2.6e-05	yes	up	K14508	NPR1	path:ko04075
c22394_g1	0.16	4.08	3.99	5.49e-07	2.6e-05	yes	up	K09285	OVM, ANT	_
c69326_g4	0.04	23.44	7.42	5.49e-07	2.6e-05	yes	up	_	_	_
c67186_g1	57.29	7.35	-2.95	5.61e-07	2.65e-05	yes	down	_	_	_
c63079_g2	0	93.01	9.86	5.63e-07	2.66e-05	yes	up	_	_	_
c56338_g2	0	8.9	6.49	5.66e-07	2.67e-05	yes	up	_	_	_
c72586_g1	0.18	52.61	7.58	5.77e-07	2.72e-05	yes	up	_	_	_
c61576_g1	26.9	0.97	-4.65	5.8e-07	2.73e-05	yes	down	_	_	_
c57615_g1	0.59	10.39	3.94	5.83e-07	2.74e-05	yes	up	_	_	_
c80159_g1	0	7.07	6.16	5.84e-07	2.74e-05	yes	up	_	_	_
c94246_g1	25.29	0.87	-4.71	5.87e-07	2.75e-05	yes	down	_	_	_
c49453_g1	3.25	0.06	-4.41	5.88e-07	2.75e-05	yes	down	_	_	_
c67234_g1	12.67	322.47	4.66	5.92e-07	2.76e-05	yes	up	K10798	PARP	path:ko03410;path:ko04210;path:ko04212
c68888_g1	8.38	0	-6.41	6.04e-07	2.82e-05	yes	down	_	_	_
c48723_g1	0.02	2.24	4.28	6.06e-07	2.82e-05	yes	up	_	_	_
c69923_g9	3.18	0	-5.03	6.08e-07	2.82e-05	yes	down	_	_	_
c54990_g1	46.16	0.4	-6.53	6.15e-07	2.85e-05	yes	down	_	_	_
c54909_g1	0.24	7.14	4.42	6.15e-07	2.85e-05	yes	up	_	_	_
c25936_g1	0	11.03	6.8	6.18e-07	2.86e-05	yes	up	_	_	_
c69141_g1	288.81	27.45	-3.39	6.23e-07	2.88e-05	yes	down	K17757	CARKD	_
c69212_g5	0	3.17	5.03	6.28e-07	2.9e-05	yes	up	_	_	_
c51876_g1	0.17	4.8	4.17	6.33e-07	2.92e-05	yes	up	_	_	_
c67688_g2	0.32	40.64	6.61	6.34e-07	2.92e-05	yes	up	_	_	_
c52455_g2	17.12	2.42	-2.77	6.38e-07	2.93e-05	yes	down	_	_	_
c68888_g2	50.73	2.68	-4.19	6.39e-07	2.93e-05	yes	down	_	_	_
c33262_g1	12.75	0.33	-4.9	6.45e-07	2.95e-05	yes	down	_	_	_
c64583_g4	10.55	0.22	-5.06	6.5e-07	2.97e-05	yes	down	K07904	RAB11A	path:ko04144;path:ko04961;path:ko04962;path:ko04972
c69234_g4	59.61	4.16	-3.81	6.54e-07	2.99e-05	yes	down	K00799	GST, gst	path:ko00480;path:ko00980;path:ko00982;path:ko05204
c68737_g1	1.56	81.54	5.62	6.77e-07	3.09e-05	yes	up	_	_	_
c61826_g2	15.35	1.21	-3.57	6.8e-07	3.1e-05	yes	down	_	_	_
c59628_g1	0.03	1.21	3.36	6.81e-07	3.1e-05	yes	up	_	_	_
c52388_g1	136.7	936.71	2.78	6.84e-07	3.11e-05	yes	up	_	_	_
c58075_g1	0.31	9.39	4.53	6.89e-07	3.12e-05	yes	up	_	_	_
c6329_g1	26.77	0	-8.07	6.93e-07	3.14e-05	yes	down	_	_	_
c66342_g1	0.01	6.75	5.91	6.95e-07	3.14e-05	yes	up	K17604	ZSWIM3	_
c41107_g2	7.79	0.86	-3.04	7.03e-07	3.17e-05	yes	down	K14491	ARR-B	path:ko04075
c80099_g1	51.35	0.12	-7.86	7.15e-07	3.22e-05	yes	down	_	_	_
c70783_g1	125.17	829.1	2.73	7.15e-07	3.22e-05	yes	up	K01177	E3.2.1.2	path:ko00500;path:ko01100
c67524_g1	8.22	84.03	3.34	7.17e-07	3.22e-05	yes	up	_	_	_
c69598_g6	0.09	4.92	4.7	7.21e-07	3.24e-05	yes	up	_	_	_
c69451_g1	116.52	18.18	-2.67	7.24e-07	3.24e-05	yes	down	K11252	H2B	path:ko05034;path:ko05203;path:ko05322
c51659_g1	16.77	373.67	4.47	7.24e-07	3.24e-05	yes	up	K08360	CYB561	_
c60525_g1	56.99	374.5	2.71	7.31e-07	3.27e-05	yes	up	_	_	_
c54383_g1	0	4.91	5.65	7.43e-07	3.31e-05	yes	up	_	_	_
c69990_g1	6.38	0.12	-4.89	7.51e-07	3.35e-05	yes	down	_	_	_
c52527_g1	62.95	1.57	-5.24	7.58e-07	3.37e-05	yes	down	_	_	_
c29557_g1	16.7	143.31	3.09	7.6e-07	3.38e-05	yes	up	_	_	_
c102112_g1	0	8.25	6.38	7.6e-07	3.38e-05	yes	up	_	_	_
c108935_g1	24.53	2.9	-3.04	7.64e-07	3.39e-05	yes	down	K09222	REST	path:ko04550;path:ko05016
c51657_g1	8.16	0	-6.37	7.73e-07	3.42e-05	yes	down	_	_	_
c60647_g1	2.29	35.87	3.91	7.74e-07	3.42e-05	yes	up	_	_	_
c71628_g1	29.18	0.06	-7.48	7.74e-07	3.42e-05	yes	down	_	_	_
c69518_g1	3.06	0.24	-3.2	7.81e-07	3.44e-05	yes	down	K02641	petH	path:ko00195;path:ko01100
c70074_g5	1.08	16.73	3.84	7.86e-07	3.46e-05	yes	up	_	_	_
c57800_g1	0.02	2.17	4.25	7.87e-07	3.46e-05	yes	up	_	_	_
c50573_g1	0.08	5.13	4.84	7.96e-07	3.49e-05	yes	up	_	_	_
c61225_g1	25.89	182.91	2.82	8.02e-07	3.51e-05	yes	up	_	_	_
c87214_g1	130.69	13.21	-3.3	8.1e-07	3.55e-05	yes	down	_	_	_
c58472_g1	6.85	0.27	-4.23	8.13e-07	3.56e-05	yes	down	_	_	_
c55431_g1	9.91	2.04	-2.22	8.15e-07	3.56e-05	yes	down	K11498	CENPE	_
c71016_g1	1.69	0	-4.16	8.21e-07	3.58e-05	yes	down	_	_	_
c67698_g3	14.27	0.79	-4.02	8.25e-07	3.59e-05	yes	down	_	_	_
c54548_g1	12.57	88.03	2.8	8.29e-07	3.6e-05	yes	up	_	_	_
c61751_g1	0.11	13.02	5.95	8.52e-07	3.7e-05	yes	up	_	_	_
c58161_g2	0.07	7.41	5.48	8.53e-07	3.7e-05	yes	up	_	_	_
c68836_g3	0.01	1.45	3.84	8.55e-07	3.7e-05	yes	up	K17426	MRPL45	_
c71018_g1	0	7.32	6.21	8.56e-07	3.7e-05	yes	up	_	_	_
c27521_g1	9.46	1.46	-2.61	8.71e-07	3.76e-05	yes	down	_	_	_
c69546_g3	0	9.57	6.6	8.79e-07	3.79e-05	yes	up	_	_	_
c39567_g2	35.86	4.06	-3.11	8.95e-07	3.86e-05	yes	down	K15398	CYP86A4S	path:ko00073;path:ko01100
c62365_g2	0.01	3.79	5.2	8.97e-07	3.86e-05	yes	up	_	_	_
c67337_g2	5.59	0.21	-4.2	8.99e-07	3.86e-05	yes	down	_	_	_
c64821_g1	0.12	21.68	6.61	9.08e-07	3.9e-05	yes	up	_	_	_
c57405_g1	8.2	58.11	2.81	9.11e-07	3.9e-05	yes	up	_	_	_
c58601_g2	0	4.56	5.54	9.18e-07	3.93e-05	yes	up	_	_	_
c8891_g1	1.37	0.03	-3.51	9.25e-07	3.95e-05	yes	down	_	_	_
c70074_g4	1.47	13.91	3.16	9.27e-07	3.96e-05	yes	up	_	_	_
c67636_g3	1.6	77.99	5.52	9.3e-07	3.96e-05	yes	up	_	_	_
c71712_g4	53.42	11.44	-2.21	9.52e-07	4.05e-05	yes	down	_	_	_
c63590_g1	71.55	545.99	2.93	9.68e-07	4.11e-05	yes	up	_	_	_
c55334_g1	4	0.06	-4.66	9.69e-07	4.11e-05	yes	down	_	_	_
c66286_g1	0.47	5.92	3.39	9.74e-07	4.12e-05	yes	up	_	_	_
c62250_g2	19.13	202.55	3.4	9.75e-07	4.12e-05	yes	up	K00164	OGDH, sucA	path:ko00020;path:ko00310;path:ko00380;path:ko01100;path:ko01110;path:ko01120;path:ko01130;path:ko01200
c70699_g7	0.62	17.93	4.64	9.77e-07	4.13e-05	yes	up	_	_	_
c71262_g1	0.01	2.33	4.41	9.79e-07	4.13e-05	yes	up	K12125	ELF3	path:ko04712
c29842_g2	77.31	0	-9.6	9.82e-07	4.14e-05	yes	down	_	_	_
c16402_g1	2.99	0.05	-4.34	9.86e-07	4.15e-05	yes	down	_	_	_
c66059_g3	0	10.78	6.76	1e-06	4.21e-05	yes	up	_	_	_
c60223_g2	8.52	0.42	-4.05	1.01e-06	4.22e-05	yes	down	_	_	_
c45543_g4	27.99	2.17	-3.63	1.01e-06	4.23e-05	yes	down	_	_	_
c59346_g1	11.37	0.5	-4.26	1.02e-06	4.27e-05	yes	down	_	_	_
c89014_g1	6.86	113.17	4.03	1.02e-06	4.27e-05	yes	up	_	_	_
c58496_g3	3.37	0.08	-4.29	1.02e-06	4.27e-05	yes	down	_	_	_
c66564_g1	0.59	12.77	4.22	1.02e-06	4.27e-05	yes	up	_	_	_
c58761_g1	9.45	0	-6.58	1.03e-06	4.29e-05	yes	down	_	_	_
c49506_g2	0.08	7.87	5.48	1.03e-06	4.3e-05	yes	up	_	_	_
c53639_g1	11.96	1539.95	7	1.03e-06	4.3e-05	yes	up	_	_	_
c66238_g1	2.67	24.98	3.18	1.04e-06	4.33e-05	yes	up	K08202	SLC22A4_5, OCTN	path:ko05231
c48346_g1	10.3	0.52	-4.07	1.05e-06	4.33e-05	yes	down	_	_	_
c59869_g2	0.35	9.78	4.46	1.05e-06	4.33e-05	yes	up	_	_	_
c22250_g1	0.12	9.05	5.39	1.07e-06	4.4e-05	yes	up	_	_	_
c26176_g1	0.06	7.05	5.45	1.07e-06	4.41e-05	yes	up	_	_	_
c70724_g3	93.51	18.49	-2.33	1.07e-06	4.42e-05	yes	down	K01455	E3.5.1.49	path:ko00460;path:ko00630;path:ko00910;path:ko01200
c67574_g6	3.9	0.11	-4.23	1.08e-06	4.45e-05	yes	down	_	_	_
c68414_g3	0.21	16.77	5.78	1.1e-06	4.53e-05	yes	up	_	_	_
c28780_g1	9.56	57.59	2.58	1.14e-06	4.67e-05	yes	up	_	_	_
c68821_g5	15.2	1.96	-2.89	1.14e-06	4.68e-05	yes	down	_	_	_
c50141_g1	0.83	19.26	4.37	1.15e-06	4.69e-05	yes	up	K00021	HMGCR	path:ko00900;path:ko01100;path:ko01110;path:ko01130;path:ko04152;path:ko04976
c48464_g1	28.66	0	-8.17	1.15e-06	4.7e-05	yes	down	_	_	_
c68174_g2	2.16	0.15	-3.18	1.15e-06	4.7e-05	yes	down	_	_	_
c420_g1	326.11	87.5	-1.9	1.15e-06	4.7e-05	yes	down	K00059	fabG	path:ko00061;path:ko00780;path:ko01040;path:ko01100;path:ko01212
c67317_g8	0.63	32.07	5.46	1.19e-06	4.83e-05	yes	up	_	_	_
c101338_g1	120.51	33.85	-1.83	1.2e-06	4.89e-05	yes	down	K02160	accB, bccP	path:ko00061;path:ko00253;path:ko00620;path:ko00640;path:ko00720;path:ko01100;path:ko01110;path:ko01120;path:ko01130;path:ko01200;path:ko01212
c45543_g3	25.1	2.1	-3.51	1.21e-06	4.9e-05	yes	down	_	_	_
c62776_g1	15.11	1.65	-3.12	1.21e-06	4.9e-05	yes	down	K09646	SCPEP1	_
c65730_g1	51.59	360.57	2.8	1.21e-06	4.9e-05	yes	up	_	_	_
c68298_g3	27.59	7.01	-1.96	1.21e-06	4.91e-05	yes	down	K18932	ZDHHC	_
c8431_g2	0	8.19	6.37	1.21e-06	4.91e-05	yes	up	_	_	_
c57690_g2	27.87	4.01	-2.77	1.22e-06	4.94e-05	yes	down	K09873	TIP	_
c67620_g3	12.3	189.38	3.93	1.23e-06	4.94e-05	yes	up	_	_	_
c28946_g1	2.95	0.14	-3.65	1.23e-06	4.97e-05	yes	down	_	_	_
c52546_g1	2.23	0.05	-3.91	1.24e-06	4.97e-05	yes	down	_	_	_
c67041_g1	4.22	0.15	-4.14	1.25e-06	5.02e-05	yes	down	_	_	_
c56111_g1	7.4	0.42	-3.84	1.26e-06	5.05e-05	yes	down	K02717	psbP	path:ko00195;path:ko01100
c58962_g1	3.12	0.04	-4.49	1.26e-06	5.05e-05	yes	down	K09422	MYBP	_
c38994_g1	39.2	8.4	-2.21	1.27e-06	5.05e-05	yes	down	_	_	_
c45780_g1	2.97	0	-4.94	1.27e-06	5.05e-05	yes	down	_	_	_
c88470_g1	19.73	0.8	-4.47	1.27e-06	5.05e-05	yes	down	_	_	_
c62459_g2	11.06	0	-6.8	1.27e-06	5.05e-05	yes	down	_	_	_
c49479_g2	24.03	2.05	-3.49	1.27e-06	5.05e-05	yes	down	K07199	PRKAB	path:ko04068;path:ko04152;path:ko04211;path:ko04213;path:ko04710;path:ko04910;path:ko04920;path:ko04921;path:ko04922;path:ko04931;path:ko04932;path:ko05410
c66623_g4	5.36	54.7	3.33	1.27e-06	5.05e-05	yes	up	K10638	UHRF1, NP95	_
c36842_g1	77.96	14.32	-2.44	1.28e-06	5.08e-05	yes	down	K00873	PK, pyk	path:ko00010;path:ko00230;path:ko00620;path:ko01100;path:ko01110;path:ko01120;path:ko01130;path:ko01200;path:ko01230;path:ko04922;path:ko04930;path:ko05203;path:ko05230
c68282_g3	0.23	30.48	6.52	1.3e-06	5.14e-05	yes	up	_	_	_
c71447_g1	0	10.03	6.66	1.31e-06	5.18e-05	yes	up	_	_	_
c40075_g1	0.85	0	-3.25	1.31e-06	5.19e-05	yes	down	_	_	_
c66493_g1	0.23	9.08	4.82	1.33e-06	5.25e-05	yes	up	_	_	_
c88026_g1	21.25	0.46	-5.25	1.33e-06	5.26e-05	yes	down	_	_	_
c24690_g2	6.98	0	-6.15	1.35e-06	5.31e-05	yes	down	_	_	_
c67225_g1	0	13.86	7.13	1.36e-06	5.37e-05	yes	up	_	_	_
c69605_g1	0.08	2.08	3.61	1.37e-06	5.37e-05	yes	up	_	_	_
c53779_g1	3.21	0	-5.05	1.37e-06	5.4e-05	yes	down	_	_	_
c61718_g2	9.43	197.93	4.38	1.38e-06	5.42e-05	yes	up	K01953	asnB, ASNS	path:ko00250;path:ko01100;path:ko01110
c109132_g1	1.22	0	-3.73	1.38e-06	5.42e-05	yes	down	_	_	_
c68295_g5	0	5.69	5.86	1.39e-06	5.44e-05	yes	up	K14489	AHK2_3_4	path:ko04075
c68236_g1	27.74	213.98	2.94	1.39e-06	5.45e-05	yes	up	_	_	_
c46188_g2	0	5.36	5.77	1.4e-06	5.48e-05	yes	up	_	_	_
c108799_g1	21.27	534.13	4.64	1.44e-06	5.6e-05	yes	up	_	_	_
c64780_g1	104.85	22.66	-2.21	1.44e-06	5.62e-05	yes	down	_	_	_
c59453_g1	12.67	0.34	-4.86	1.45e-06	5.64e-05	yes	down	_	_	_
c70496_g1	10.84	80.52	2.88	1.47e-06	5.69e-05	yes	up	K08241	E2.1.1.141	path:ko00592;path:ko01110
c29612_g1	12.67	395.99	4.95	1.48e-06	5.72e-05	yes	up	_	_	_
c61714_g1	38.59	265.59	2.78	1.48e-06	5.75e-05	yes	up	K01620	ltaE	path:ko00260;path:ko01100;path:ko01110;path:ko01120;path:ko01130;path:ko01230
c72344_g1	49.61	13.05	-1.92	1.49e-06	5.76e-05	yes	down	_	_	_
c36790_g1	7.29	0.23	-4.48	1.51e-06	5.85e-05	yes	down	K02291	crtB	path:ko00906;path:ko01100;path:ko01110
c51649_g4	0.4	9.86	4.31	1.52e-06	5.86e-05	yes	up	_	_	_
c69990_g2	18.77	2.32	-2.96	1.53e-06	5.9e-05	yes	down	_	_	_
c70915_g1	19.96	0	-7.65	1.54e-06	5.92e-05	yes	down	K16298	SCPL-IV	_
c68076_g1	0.04	4.04	4.87	1.55e-06	5.97e-05	yes	up	_	_	_
c71918_g1	11.68	1.09	-3.31	1.59e-06	6.11e-05	yes	down	_	_	_
c68727_g1	228.5	15.23	-3.9	1.6e-06	6.13e-05	yes	down	K01177	E3.2.1.2	path:ko00500;path:ko01100
c45934_g1	0.09	14.05	6.25	1.6e-06	6.14e-05	yes	up	_	_	_
c37897_g1	215.67	44.64	-2.27	1.61e-06	6.14e-05	yes	down	K09285	OVM, ANT	_
c44762_g1	2.49	16.24	2.66	1.61e-06	6.16e-05	yes	up	K07466	RFA1, RPA1, rpa	path:ko03030;path:ko03420;path:ko03430;path:ko03440;path:ko03460
c60655_g1	0.46	9.54	4.09	1.62e-06	6.18e-05	yes	up	_	_	_
c66546_g5	13.22	60.62	2.19	1.63e-06	6.19e-05	yes	up	_	_	_
c42960_g1	0	0.76	3.11	1.63e-06	6.19e-05	yes	up	_	_	_
c66975_g1	0.33	10.66	4.65	1.63e-06	6.2e-05	yes	up	K14826	FPR3_4	_
c58205_g3	0	11	6.79	1.64e-06	6.21e-05	yes	up	_	_	_
c1534_g1	6.72	0.35	-3.91	1.64e-06	6.21e-05	yes	down	K02699	psaL	path:ko00195;path:ko01100
c45867_g2	9.64	0	-6.61	1.65e-06	6.27e-05	yes	down	_	_	_
c70342_g1	0	7.66	6.28	1.66e-06	6.29e-05	yes	up	_	_	_
c71493_g4	9.3	0.64	-3.67	1.67e-06	6.32e-05	yes	down	_	_	_
c38735_g1	5.58	0.17	-4.41	1.68e-06	6.35e-05	yes	down	K13153	SNRNP25	_
c48699_g1	7.16	0	-6.18	1.69e-06	6.37e-05	yes	down	K01114	plcC	path:ko00562;path:ko00564;path:ko00565;path:ko01100;path:ko01110;path:ko04919
c65464_g2	3.73	0	-5.26	1.69e-06	6.38e-05	yes	down	_	_	_
c70406_g6	0.79	12.34	3.8	1.71e-06	6.44e-05	yes	up	K10742	DNA2	path:ko03030
c50509_g1	6.8	36.29	2.4	1.78e-06	6.69e-05	yes	up	K14945	QKI	_
c70030_g2	26.33	7.37	-1.82	1.79e-06	6.71e-05	yes	down	_	_	_
c60990_g2	1.16	0.03	-3.23	1.79e-06	6.72e-05	yes	down	_	_	_
c53665_g1	1.14	17.72	3.85	1.79e-06	6.72e-05	yes	up	_	_	_
c16390_g1	0.07	22.07	7.01	1.8e-06	6.72e-05	yes	up	_	_	_
c79523_g1	1.15	38.83	4.96	1.8e-06	6.73e-05	yes	up	_	_	_
c30413_g1	0	1.99	4.39	1.83e-06	6.84e-05	yes	up	K10742	DNA2	path:ko03030
c67483_g4	0.07	5.4	4.98	1.84e-06	6.84e-05	yes	up	_	_	_
c66306_g2	0	3.58	5.2	1.84e-06	6.84e-05	yes	up	_	_	_
c80843_g1	33.9	7.7	-2.12	1.86e-06	6.91e-05	yes	down	_	_	_
c71333_g3	2.58	70.01	4.71	1.87e-06	6.94e-05	yes	up	_	_	_
c71170_g3	48.39	321.83	2.73	1.89e-06	7.01e-05	yes	up	K10798	PARP	path:ko03410;path:ko04210;path:ko04212
c49036_g2	0	6.98	6.15	1.89e-06	7.01e-05	yes	up	K14638	SLC15A3_4, PHT	_
c58443_g1	3.35	0	-5.11	1.92e-06	7.1e-05	yes	down	_	_	_
c37786_g1	13.27	0	-7.06	1.92e-06	7.11e-05	yes	down	_	_	_
c71651_g1	3.35	22.68	2.72	1.94e-06	7.17e-05	yes	up	_	_	_
c41662_g1	4.34	0	-5.47	1.94e-06	7.17e-05	yes	down	_	_	_
c71084_g1	0	4.47	5.51	1.95e-06	7.18e-05	yes	up	_	_	_
c61715_g1	0.46	11.16	4.34	1.96e-06	7.2e-05	yes	up	K12153	CYP79A2	path:ko00460;path:ko00966;path:ko01110;path:ko01210
c65581_g1	25.56	3.18	-2.97	1.97e-06	7.24e-05	yes	down	_	_	_
c33592_g1	4.09	0.11	-4.29	2e-06	7.34e-05	yes	down	K13457	RPM1, RPS3	path:ko04626
c37309_g1	5.43	0	-5.79	2e-06	7.35e-05	yes	down	_	_	_
c71881_g4	16.42	2.53	-2.65	2.01e-06	7.35e-05	yes	down	_	_	_
c22761_g3	5.42	0.07	-5.02	2.02e-06	7.38e-05	yes	down	_	_	_
c94129_g1	0.93	7.64	2.91	2.04e-06	7.46e-05	yes	up	K15639	CYP734A1, BAS1	path:ko00905
c96908_g1	0	10.04	6.66	2.07e-06	7.56e-05	yes	up	K00430	E1.11.1.7	path:ko00940;path:ko01100;path:ko01110
c63272_g1	0.84	14.71	3.98	2.1e-06	7.66e-05	yes	up	_	_	_
c70763_g1	0.3	10.91	4.77	2.11e-06	7.69e-05	yes	up	_	_	_
c68381_g3	47.96	310.94	2.69	2.11e-06	7.69e-05	yes	up	K15095	E1.1.1.208	path:ko00902;path:ko01110
c59606_g2	24.82	149.64	2.59	2.12e-06	7.69e-05	yes	up	_	_	_
c29035_g1	0.14	5.69	4.58	2.12e-06	7.71e-05	yes	up	_	_	_
c69517_g1	4.2	73.97	4.11	2.16e-06	7.84e-05	yes	up	_	_	_
c68836_g1	0.34	9.76	4.47	2.19e-06	7.93e-05	yes	up	K15340	DCLRE1A, SNM1A, PSO2	_
c60883_g1	0	6.25	5.99	2.22e-06	8.02e-05	yes	up	_	_	_
c59663_g1	0.06	3.07	4.31	2.25e-06	8.14e-05	yes	up	_	_	_
c56018_g1	0	4.43	5.5	2.26e-06	8.15e-05	yes	up	_	_	_
c61032_g2	0.37	14.58	4.97	2.26e-06	8.15e-05	yes	up	_	_	_
c60619_g1	1.13	21.08	4.11	2.26e-06	8.15e-05	yes	up	K11831	NRF1	path:ko05016
c30736_g1	170.15	18.74	-3.18	2.28e-06	8.18e-05	yes	down	_	_	_
c57741_g1	0.28	7.76	4.36	2.28e-06	8.18e-05	yes	up	_	_	_
c59869_g1	0.03	2.68	4.37	2.29e-06	8.2e-05	yes	up	_	_	_
c66533_g2	44.87	291.8	2.7	2.29e-06	8.2e-05	yes	up	_	_	_
c61837_g1	32.1	5.98	-2.4	2.3e-06	8.23e-05	yes	down	K10661	MARCH6, DOA10	path:ko04141
c36624_g1	0.39	6.4	3.72	2.31e-06	8.27e-05	yes	up	_	_	_
c5663_g1	148.48	4.76	-4.93	2.33e-06	8.31e-05	yes	down	_	_	_
c50068_g1	2.12	0.07	-3.69	2.33e-06	8.32e-05	yes	down	_	_	_
c62737_g1	4.32	0.16	-4.1	2.34e-06	8.32e-05	yes	down	K08901	psbQ	path:ko00195;path:ko01100
c79708_g1	110.01	17.49	-2.65	2.34e-06	8.33e-05	yes	down	_	_	_
c62757_g6	1	19.05	4.13	2.34e-06	8.33e-05	yes	up	_	_	_
c33116_g1	0.38	9.18	4.28	2.37e-06	8.43e-05	yes	up	_	_	_
c68084_g1	1.06	0.03	-3.1	2.38e-06	8.46e-05	yes	down	K18753	ZFP36L	_
c17369_g1	0.03	1.53	3.67	2.41e-06	8.54e-05	yes	up	_	_	_
c68204_g1	14.26	71	2.31	2.44e-06	8.66e-05	yes	up	K17871	ndh1	_
c66995_g5	31.05	181.29	2.54	2.45e-06	8.67e-05	yes	up	K12657	ALDH18A1, P5CS	path:ko00330;path:ko01100;path:ko01110;path:ko01230
c65751_g1	1.82	16.45	3.1	2.48e-06	8.75e-05	yes	up	_	_	_
c18614_g1	21.19	5.46	-1.94	2.48e-06	8.75e-05	yes	down	_	_	_
c70025_g1	0.24	7.18	4.43	2.49e-06	8.77e-05	yes	up	_	_	_
c12434_g1	5.02	0.15	-4.37	2.52e-06	8.89e-05	yes	down	_	_	_
c68282_g4	0	5.39	5.78	2.56e-06	8.99e-05	yes	up	_	_	_
c64683_g1	0	9.77	6.62	2.56e-06	8.99e-05	yes	up	_	_	_
c531_g1	20.16	0	-7.66	2.58e-06	9.04e-05	yes	down	_	_	_
c10610_g1	2.76	0	-4.84	2.6e-06	9.11e-05	yes	down	_	_	_
c58096_g1	3.75	40.4	3.4	2.61e-06	9.12e-05	yes	up	_	_	_
c71323_g1	0.1	15.92	6.3	2.61e-06	9.14e-05	yes	up	K00276	AOC3, AOC2, tynA	path:ko00260;path:ko00350;path:ko00360;path:ko00410;path:ko00950;path:ko00960;path:ko01100;path:ko01110
c67381_g3	0.05	9.13	5.93	2.65e-06	9.25e-05	yes	up	K10742	DNA2	path:ko03030
c94032_g1	114.63	7.63	-3.89	2.65e-06	9.25e-05	yes	down	K15402	CYP86B1	path:ko00073
c110329_g1	21.95	0	-7.78	2.68e-06	9.33e-05	yes	down	_	_	_
c94095_g1	30.51	253.83	3.05	2.68e-06	9.33e-05	yes	up	_	_	_
c68327_g7	40.5	1.3	-4.86	2.69e-06	9.37e-05	yes	down	K16296	SCPL-I	_
c68679_g1	0	4.89	5.64	2.7e-06	9.37e-05	yes	up	_	_	_
c68263_g1	1.26	23.06	4.09	2.75e-06	9.56e-05	yes	up	_	_	_
c69624_g2	8.01	0.41	-3.98	2.77e-06	9.58e-05	yes	down	K14484	IAA	path:ko04075
c71387_g3	49.34	5.13	-3.24	2.77e-06	9.58e-05	yes	down	K00430	E1.11.1.7	path:ko00940;path:ko01100;path:ko01110
c46728_g1	0	1.63	4.11	2.82e-06	9.77e-05	yes	up	_	_	_
c71940_g1	1.13	48.88	5.32	2.84e-06	9.81e-05	yes	up	_	_	_
c18629_g2	11.91	1.54	-2.87	2.85e-06	9.84e-05	yes	down	K10436	MAPRE	_
c62179_g1	11.73	0.09	-5.99	2.86e-06	9.85e-05	yes	down	_	_	_
c55276_g1	0	12.41	6.97	2.86e-06	9.85e-05	yes	up	K02960	RP-S16e, RPS16	path:ko03010
c67126_g3	0.08	2.95	4.1	2.88e-06	9.92e-05	yes	up	_	_	_
c68468_g3	1.58	12.12	2.86	2.89e-06	9.92e-05	yes	up	_	_	_
c62919_g1	0.02	7.15	5.86	2.91e-06	0.0001	yes	up	_	_	_
c64049_g2	0.36	51.82	6.81	2.92e-06	0.0001	yes	up	_	_	_
c70173_g3	142.4	886.44	2.64	2.93e-06	0.0001	yes	up	_	_	_
c71886_g3	5.69	64.86	3.49	2.93e-06	0.0001	yes	up	K14431	TGA	path:ko04075
c56516_g1	300.01	80.39	-1.9	2.95e-06	0.000101	yes	down	K09458	fabF	path:ko00061;path:ko00780;path:ko01100;path:ko01212
c71436_g4	0	13.08	7.04	2.96e-06	0.000101	yes	up	_	_	_
c37310_g1	0.13	4.49	4.33	2.99e-06	0.000102	yes	up	_	_	_
c68502_g3	30.67	0.31	-6.22	2.99e-06	0.000102	yes	down	_	_	_
c23068_g1	37.62	7.56	-2.3	2.99e-06	0.000102	yes	down	_	_	_
c70824_g1	3.71	34.32	3.17	3.01e-06	0.000102	yes	up	K08150	SLC2A13, ITR	_
c68398_g4	3.54	23.34	2.69	3.02e-06	0.000103	yes	up	_	_	_
c68320_g3	0.48	22.93	5.32	3.03e-06	0.000103	yes	up	K05909	E1.10.3.2	_
c66361_g3	0.22	5.27	4.08	3.04e-06	0.000103	yes	up	_	_	_
c71601_g3	2.67	88.48	5	3.04e-06	0.000103	yes	up	_	_	_
c68880_g1	1.82	0.06	-3.57	3.05e-06	0.000103	yes	down	_	_	_
c89464_g1	0	8.19	6.37	3.06e-06	0.000103	yes	up	_	_	_
c70952_g3	54	276.81	2.36	3.06e-06	0.000103	yes	up	_	_	_
c70255_g1	2.54	39.54	3.91	3.07e-06	0.000103	yes	up	_	_	_
c56993_g1	0.06	5.99	5.25	3.1e-06	0.000104	yes	up	_	_	_
c67523_g1	0.1	9.4	5.55	3.12e-06	0.000105	yes	up	_	_	_
c60835_g3	3.67	0	-5.23	3.14e-06	0.000105	yes	down	_	_	_
c54593_g1	0.01	1.49	3.8	3.16e-06	0.000106	yes	up	_	_	_
c29280_g2	12.82	0	-7.01	3.2e-06	0.000107	yes	down	K05909	E1.10.3.2	_
c87566_g1	0	13.11	7.05	3.2e-06	0.000107	yes	up	_	_	_
c53282_g1	2.76	0.06	-4.14	3.24e-06	0.000108	yes	down	_	_	_
c50594_g1	0	1.05	3.48	3.3e-06	0.00011	yes	up	_	_	_
c16477_g1	0.11	2.33	3.56	3.3e-06	0.00011	yes	up	_	_	_
c101643_g1	0	5.59	5.83	3.34e-06	0.000111	yes	up	_	_	_
c48041_g1	0.18	10.02	5.18	3.34e-06	0.000111	yes	up	_	_	_
c46105_g1	0	3.9	5.32	3.35e-06	0.000111	yes	up	_	_	_
c69801_g1	0.98	18.72	4.12	3.37e-06	0.000112	yes	up	_	_	_
c59237_g1	12.5	0.03	-6.62	3.37e-06	0.000112	yes	down	_	_	_
c71713_g1	16.49	3.81	-2.09	3.41e-06	0.000113	yes	down	_	_	_
c60098_g1	3.75	39.66	3.37	3.41e-06	0.000113	yes	up	_	_	_
c63207_g1	0.27	9.04	4.61	3.42e-06	0.000113	yes	up	_	_	_
c16416_g1	19.13	3.19	-2.55	3.43e-06	0.000113	yes	down	K02608	ORC6	path:ko04110;path:ko04111;path:ko04113
c57520_g2	0.95	22.07	4.41	3.46e-06	0.000114	yes	up	_	_	_
c37507_g1	0	5.09	5.7	3.46e-06	0.000114	yes	up	_	_	_
c40963_g1	1.55	0	-4.04	3.48e-06	0.000115	yes	down	_	_	_
c71781_g5	12.22	3.95	-1.6	3.49e-06	0.000115	yes	down	K10398	KIF11, EG5	_
c66518_g1	841.11	139.16	-2.59	3.49e-06	0.000115	yes	down	_	_	_
c24140_g1	1.03	17.95	3.99	3.49e-06	0.000115	yes	up	_	_	_
c47593_g1	13.94	0.1	-6.1	3.51e-06	0.000115	yes	down	_	_	_
c66919_g1	24.57	396.09	4.01	3.57e-06	0.000117	yes	up	_	_	_
c55869_g3	5.54	0.05	-5.25	3.59e-06	0.000118	yes	down	K01514	PRUNE, PPX1	path:ko00230
c23691_g1	2.02	0.05	-3.86	3.62e-06	0.000118	yes	down	_	_	_
c58496_g2	3.92	0	-5.33	3.64e-06	0.000119	yes	down	_	_	_
c53273_g2	0	0.61	2.83	3.66e-06	0.00012	yes	up	_	_	_
c71203_g1	4.93	0.32	-3.57	3.67e-06	0.00012	yes	down	_	_	_
c19911_g1	21.28	0	-7.74	3.67e-06	0.00012	yes	down	_	_	_
c399_g1	0.69	11.34	3.86	3.7e-06	0.00012	yes	up	_	_	_
c47570_g1	0.06	1.61	3.42	3.74e-06	0.000122	yes	up	_	_	_
c69032_g2	1.41	26.38	4.14	3.74e-06	0.000122	yes	up	K05666	ABCC2	path:ko02010;path:ko04976
c49586_g2	8.86	0.4	-4.16	3.75e-06	0.000122	yes	down	K14638	SLC15A3_4, PHT	_
c45789_g2	4.6	31.8	2.76	3.79e-06	0.000123	yes	up	_	_	_
c59594_g3	0.06	23.59	7.23	3.79e-06	0.000123	yes	up	K13449	PR1	path:ko04075;path:ko04626
c16389_g1	3.69	0.07	-4.48	3.89e-06	0.000126	yes	down	K09422	MYBP	_
c71544_g1	11.88	70.1	2.55	3.89e-06	0.000126	yes	up	_	_	_
c70043_g1	8.51	107.41	3.64	3.9e-06	0.000126	yes	up	_	_	_
c61164_g2	23.81	203.94	3.09	3.95e-06	0.000128	yes	up	K17279	REEP5_6	_
c34666_g1	0.02	2.81	4.6	3.96e-06	0.000128	yes	up	_	_	_
c70758_g1	5.98	0	-5.93	3.97e-06	0.000128	yes	down	K09287	RAV	_
c50141_g3	1.45	19.38	3.65	4.01e-06	0.000129	yes	up	K00021	HMGCR	path:ko00900;path:ko01100;path:ko01110;path:ko01130;path:ko04152;path:ko04976
c68115_g4	0	8.64	6.45	4.03e-06	0.000129	yes	up	_	_	_
c58299_g1	138.67	4.81	-4.82	4.03e-06	0.00013	yes	down	_	_	_
c52192_g1	28.59	1.2	-4.47	4.05e-06	0.00013	yes	down	K01051	E3.1.1.11	path:ko00040;path:ko00500;path:ko01100
c60290_g1	3.12	74.92	4.54	4.07e-06	0.00013	yes	up	_	_	_
c70872_g1	2.74	94.63	5.06	4.09e-06	0.000131	yes	up	_	_	_
c68380_g1	2.84	0.1	-3.88	4.09e-06	0.000131	yes	down	_	_	_
c69293_g1	20.86	5.7	-1.85	4.1e-06	0.000131	yes	down	K03255	TIF31, CLU1	_
c69366_g1	0.07	9.01	5.75	4.11e-06	0.000131	yes	up	_	_	_
c50648_g1	0.03	5.06	5.32	4.18e-06	0.000133	yes	up	_	_	_
c4627_g1	0	1.31	3.82	4.19e-06	0.000133	yes	up	_	_	_
c61156_g2	46.01	10.55	-2.11	4.2e-06	0.000134	yes	down	_	_	_
c69496_g9	0	9.52	6.59	4.23e-06	0.000134	yes	up	_	_	_
c16064_g1	114.42	16.07	-2.82	4.24e-06	0.000135	yes	down	_	_	_
c67695_g1	0.64	19.2	4.7	4.3e-06	0.000136	yes	up	_	_	_
c67108_g5	0.02	4.97	5.37	4.32e-06	0.000137	yes	up	_	_	_
c53196_g1	25.59	225.3	3.13	4.32e-06	0.000137	yes	up	_	_	_
c52403_g2	2.73	29.51	3.39	4.34e-06	0.000137	yes	up	_	_	_
c21267_g1	0	2.85	4.88	4.34e-06	0.000137	yes	up	_	_	_
c57045_g1	172.69	1295.03	2.91	4.37e-06	0.000138	yes	up	_	_	_
c38360_g1	6.01	41.72	2.77	4.37e-06	0.000138	yes	up	_	_	_
c60021_g2	5.83	0.94	-2.51	4.41e-06	0.000139	yes	down	_	_	_
c67133_g1	74.22	409.89	2.46	4.46e-06	0.00014	yes	up	_	_	_
c36875_g1	6.11	0.29	-3.98	4.47e-06	0.000141	yes	down	_	_	_
c62321_g1	65.05	473.18	2.86	4.48e-06	0.000141	yes	up	K00830	AGXT	path:ko00250;path:ko00260;path:ko00630;path:ko00680;path:ko01100;path:ko01110;path:ko01120;path:ko01130;path:ko01200;path:ko04146
c57898_g2	1.88	58.28	4.88	4.48e-06	0.000141	yes	up	K16277	DRIP	_
c7520_g1	78.6	12.69	-2.62	4.49e-06	0.000141	yes	down	_	_	_
c65076_g4	0.03	1.92	3.91	4.49e-06	0.000141	yes	up	_	_	_
c69577_g1	45.8	294.66	2.68	4.52e-06	0.000141	yes	up	K03098	APOD	_
c29392_g1	3.6	0	-5.21	4.53e-06	0.000142	yes	down	_	_	_
c62356_g1	0.32	6.29	3.93	4.56e-06	0.000142	yes	up	_	_	_
c68924_g1	12.33	82.9	2.74	4.66e-06	0.000145	yes	up	_	_	_
c66850_g1	8.45	1.58	-2.35	4.7e-06	0.000146	yes	down	_	_	_
c58918_g1	0.06	3.82	4.64	4.72e-06	0.000147	yes	up	_	_	_
c11344_g1	0	4.38	5.49	4.76e-06	0.000148	yes	up	_	_	_
c69347_g1	0.34	19.84	5.49	4.81e-06	0.000149	yes	up	_	_	_
c65849_g1	1.98	0	-4.38	4.83e-06	0.00015	yes	down	_	_	_
c71075_g1	0.05	11.28	6.29	4.93e-06	0.000153	yes	up	_	_	_
c71200_g1	0.13	2.76	3.64	4.94e-06	0.000153	yes	up	_	_	_
c67555_g5	5.91	35.11	2.55	4.98e-06	0.000154	yes	up	_	_	_
c50146_g2	0.31	0	-2.05	5.01e-06	0.000155	yes	down	_	_	_
c55234_g1	17.41	152.59	3.12	5.05e-06	0.000156	yes	up	_	_	_
c70445_g2	0	32.9	8.37	5.09e-06	0.000157	yes	up	_	_	_
c5359_g1	4.95	32.17	2.68	5.1e-06	0.000157	yes	up	_	_	_
c70605_g2	22.35	2.8	-2.95	5.18e-06	0.00016	yes	down	_	_	_
c61963_g1	1.19	0	-3.69	5.22e-06	0.00016	yes	down	_	_	_
c68533_g3	1.03	17.74	3.98	5.23e-06	0.000161	yes	up	_	_	_
c69380_g1	0.32	18.73	5.48	5.27e-06	0.000162	yes	up	_	_	_
c28984_g1	11.78	61.02	2.36	5.28e-06	0.000162	yes	up	_	_	_
c94924_g1	1.27	0	-3.77	5.32e-06	0.000163	yes	down	_	_	_
c55105_g2	6.82	0.04	-5.67	5.33e-06	0.000163	yes	down	_	_	_
c63376_g2	0.57	15.74	4.56	5.33e-06	0.000163	yes	up	K03834	tyrP	_
c32799_g1	32	0	-8.33	5.33e-06	0.000163	yes	down	_	_	_
c59026_g1	0	1.61	4.1	5.34e-06	0.000163	yes	up	_	_	_
c40304_g1	8.71	1.6	-2.38	5.36e-06	0.000163	yes	down	_	_	_
c46457_g1	0.53	39.33	5.98	5.37e-06	0.000163	yes	up	_	_	_
c47985_g2	0	8.4	6.41	5.41e-06	0.000165	yes	up	_	_	_
c57912_g1	1.25	0.05	-3.15	5.41e-06	0.000165	yes	down	_	_	_
c63412_g1	0	6.68	6.08	5.45e-06	0.000165	yes	up	_	_	_
c60596_g1	0	14.17	7.16	5.45e-06	0.000165	yes	up	_	_	_
c69978_g1	35.54	5.06	-2.79	5.47e-06	0.000166	yes	down	_	_	_
c2388_g1	7.02	118.91	4.06	5.49e-06	0.000166	yes	up	_	_	_
c88169_g1	14.39	2	-2.78	5.5e-06	0.000166	yes	down	_	_	_
c56342_g1	12.3	0	-6.95	5.52e-06	0.000167	yes	down	_	_	_
c71018_g4	0	1.99	4.39	5.56e-06	0.000168	yes	up	_	_	_
c65667_g1	1.92	0.02	-4.1	5.57e-06	0.000168	yes	down	K18195	RGL4, rhiE	_
c48986_g1	0.04	1.96	3.84	5.6e-06	0.000169	yes	up	_	_	_
c66992_g1	24.19	118.85	2.29	5.6e-06	0.000169	yes	up	_	_	_
c49634_g1	0	1.98	4.38	5.61e-06	0.000169	yes	up	_	_	_
c71859_g1	6.6	46.43	2.8	5.65e-06	0.00017	yes	up	_	_	_
c70161_g2	2.89	0.08	-4.06	5.69e-06	0.000171	yes	down	_	_	_
c61715_g2	0.46	9.95	4.16	5.73e-06	0.000172	yes	up	K12153	CYP79A2	path:ko00460;path:ko00966;path:ko01110;path:ko01210
c70947_g2	4.94	0.08	-4.8	5.76e-06	0.000173	yes	down	_	_	_
c61389_g1	20.09	4.37	-2.18	5.78e-06	0.000173	yes	down	K10436	MAPRE	_
c101439_g1	1007.13	239.92	-2.07	5.81e-06	0.000174	yes	down	_	_	_
c26925_g1	113.02	33.19	-1.76	5.81e-06	0.000174	yes	down	K14455	GOT2	path:ko00220;path:ko00250;path:ko00270;path:ko00330;path:ko00350;path:ko00360;path:ko00400;path:ko00710;path:ko00950;path:ko00960;path:ko01100;path:ko01110;path:ko01120;path:ko01130;path:ko01200;path:ko01210;path:ko01230;path:ko04975
c59267_g2	0.38	23.3	5.6	5.83e-06	0.000174	yes	up	K15014	SLC29A1_2_3, ENT1_2_3	_
c64841_g3	0	4.93	5.65	5.83e-06	0.000174	yes	up	_	_	_
c22761_g1	7.34	0	-6.22	5.86e-06	0.000175	yes	down	_	_	_
c68102_g7	0.02	1.25	3.45	5.87e-06	0.000175	yes	up	_	_	_
c65251_g3	9.83	42.93	2.12	5.91e-06	0.000176	yes	up	_	_	_
c55267_g1	0	5.57	5.82	5.96e-06	0.000177	yes	up	_	_	_
c70755_g3	0.07	5.58	5.07	5.97e-06	0.000177	yes	up	_	_	_
c69923_g6	0.16	5.71	4.46	5.98e-06	0.000177	yes	up	_	_	_
c70805_g1	231.13	15.95	-3.85	6.01e-06	0.000178	yes	down	K19355	MAN	path:ko00051
c58327_g1	4.34	0.55	-2.77	6.01e-06	0.000178	yes	down	_	_	_
c60835_g2	58.99	1.81	-4.95	6.01e-06	0.000178	yes	down	K18443	GBF1	path:ko04144
c15263_g2	0	15.91	7.32	6.04e-06	0.000179	yes	up	K19045	BB	_
c61458_g1	0	4.66	5.57	6.05e-06	0.000179	yes	up	_	_	_
c67878_g1	2.09	0	-4.45	6.06e-06	0.000179	yes	down	_	_	_
c69930_g3	2.44	0.15	-3.32	6.08e-06	0.000179	yes	down	_	_	_
c71922_g1	0.81	13.22	3.87	6.08e-06	0.000179	yes	up	_	_	_
c70406_g8	0	1.26	3.77	6.08e-06	0.000179	yes	up	K13148	CPSF3L, INTS11	_
c55230_g1	12.23	1.65	-2.82	6.09e-06	0.000179	yes	down	K02178	BUB1	path:ko04110;path:ko04111;path:ko04113;path:ko04114;path:ko04914
c63243_g2	0.01	3.24	4.86	6.09e-06	0.000179	yes	up	_	_	_
c65665_g2	3.3	48.07	3.82	6.12e-06	0.00018	yes	up	_	_	_
c69295_g2	1.59	42.15	4.65	6.18e-06	0.000181	yes	up	_	_	_
c64053_g1	0	3.98	5.35	6.2e-06	0.000182	yes	up	_	_	_
c40827_g1	7.79	0.17	-4.89	6.25e-06	0.000183	yes	down	_	_	_
c15653_g1	0	2.9	4.91	6.26e-06	0.000183	yes	up	_	_	_
c48545_g1	0.22	4.83	3.95	6.29e-06	0.000184	yes	up	_	_	_
c68332_g2	19.12	3.25	-2.52	6.33e-06	0.000185	yes	down	_	_	_
c9136_g1	3.64	0.08	-4.39	6.34e-06	0.000185	yes	down	_	_	_
c66005_g11	0	9.26	6.55	6.39e-06	0.000186	yes	up	_	_	_
c68357_g3	2.28	0.08	-3.74	6.4e-06	0.000186	yes	down	K10528	HPL	path:ko00592;path:ko01110
c55289_g3	5.15	41	2.97	6.43e-06	0.000187	yes	up	_	_	_
c71251_g5	0	2.47	4.68	6.58e-06	0.000191	yes	up	K10591	NEDD4, RSP5	path:ko04011;path:ko04120;path:ko04144;path:ko05169
c51294_g1	0	9.78	6.63	6.58e-06	0.000191	yes	up	_	_	_
c59723_g1	1.55	0.06	-3.41	6.64e-06	0.000192	yes	down	_	_	_
c61540_g4	31.64	0.6	-5.5	6.67e-06	0.000193	yes	down	_	_	_
c70556_g1	8.05	75.84	3.22	6.68e-06	0.000193	yes	up	K09422	MYBP	_
c69853_g1	0.46	6.76	3.61	6.78e-06	0.000196	yes	up	_	_	_
c64277_g1	2.27	0.21	-2.95	6.78e-06	0.000196	yes	down	_	_	_
c56615_g3	0	1.79	4.24	6.8e-06	0.000196	yes	up	_	_	_
c68026_g2	2.66	31.3	3.51	6.82e-06	0.000196	yes	up	_	_	_
c71541_g2	7.6	0	-6.27	6.83e-06	0.000197	yes	down	_	_	_
c3005_g1	0	2.81	4.86	6.83e-06	0.000197	yes	up	_	_	_
c68840_g1	0.05	2.96	4.38	6.86e-06	0.000197	yes	up	_	_	_
c54430_g2	1.86	0.08	-3.46	6.87e-06	0.000197	yes	down	_	_	_
c53841_g1	0.04	1.41	3.46	6.92e-06	0.000199	yes	up	_	_	_
c56631_g1	0.05	2.5	4.08	6.96e-06	0.000199	yes	up	_	_	_
c67979_g1	196.02	3.46	-5.78	7e-06	0.000201	yes	down	_	_	_
c66605_g1	0.15	5.3	4.42	7.02e-06	0.000201	yes	up	_	_	_
c26071_g1	8.99	394.79	5.44	7.04e-06	0.000201	yes	up	_	_	_
c67376_g1	49.87	12.9	-1.94	7.07e-06	0.000202	yes	down	K11975	RNF144	_
c65493_g5	0.33	8.11	4.24	7.12e-06	0.000203	yes	up	_	_	_
c48209_g1	7.5	0.18	-4.75	7.13e-06	0.000203	yes	down	_	_	_
c71540_g5	2.4	52.16	4.39	7.17e-06	0.000204	yes	up	_	_	_
c5586_g1	15.31	108.91	2.82	7.2e-06	0.000205	yes	up	_	_	_
c54321_g1	0	10.58	6.74	7.27e-06	0.000206	yes	up	_	_	_
c45462_g1	0.34	10.98	4.64	7.27e-06	0.000206	yes	up	_	_	_
c68275_g2	7.42	93.83	3.64	7.27e-06	0.000206	yes	up	_	_	_
c57123_g1	0	6.23	5.98	7.29e-06	0.000207	yes	up	_	_	_
c71371_g5	1.68	0	-4.15	7.33e-06	0.000208	yes	down	_	_	_
c67813_g1	0.57	6.45	3.28	7.36e-06	0.000208	yes	up	_	_	_
c57253_g4	0	3.07	4.99	7.37e-06	0.000208	yes	up	_	_	_
c65363_g1	7.27	45.32	2.62	7.38e-06	0.000208	yes	up	_	_	_
c8579_g1	200.85	38.96	-2.36	7.38e-06	0.000208	yes	down	K14487	GH3	path:ko04075
c50326_g1	0	7.94	6.33	7.39e-06	0.000208	yes	up	_	_	_
c38755_g1	3.89	75.46	4.24	7.4e-06	0.000208	yes	up	K08176	PHO84	_
c54118_g3	112.65	40.19	-1.48	7.4e-06	0.000208	yes	down	K07375	TUBB	path:ko04145;path:ko04540;path:ko05130
c57276_g1	0.07	7.26	5.42	7.43e-06	0.000209	yes	up	_	_	_
c60511_g4	0.57	8.38	3.66	7.48e-06	0.00021	yes	up	_	_	_
c67250_g2	20.66	4.98	-2.03	7.52e-06	0.000211	yes	down	K06688	UBE2C, UBC11	path:ko04120
c8797_g1	1.67	0.05	-3.56	7.55e-06	0.000212	yes	down	_	_	_
c111953_g1	0	9.79	6.63	7.55e-06	0.000212	yes	up	K14404	CPSF4, YTH1	path:ko03015;path:ko05164
c71377_g2	16.55	139.33	3.07	7.57e-06	0.000212	yes	up	K00164	OGDH, sucA	path:ko00020;path:ko00310;path:ko00380;path:ko01100;path:ko01110;path:ko01120;path:ko01130;path:ko01200
c29757_g2	0	8.52	6.43	7.61e-06	0.000213	yes	up	_	_	_
c64790_g1	0.33	5.38	3.69	7.62e-06	0.000213	yes	up	_	_	_
c37936_g1	170.87	17111.6	6.65	7.71e-06	0.000215	yes	up	_	_	_
c48320_g2	9.08	2.05	-2.1	7.75e-06	0.000216	yes	down	_	_	_
c58744_g1	64.78	9.16	-2.81	7.75e-06	0.000216	yes	down	_	_	_
c29556_g1	0	1.12	3.61	7.78e-06	0.000217	yes	up	_	_	_
c40372_g1	0.07	1.67	3.4	7.78e-06	0.000217	yes	up	K03549	kup	_
c5577_g1	0.05	1.78	3.7	7.91e-06	0.00022	yes	up	_	_	_
c68688_g11	11.34	72.07	2.66	7.92e-06	0.00022	yes	up	_	_	_
c52872_g2	0	19.29	7.6	7.93e-06	0.00022	yes	up	_	_	_
c57496_g1	0.85	25.27	4.74	7.96e-06	0.000221	yes	up	_	_	_
c54433_g1	4.11	0.21	-3.77	8.08e-06	0.000224	yes	down	_	_	_
c52325_g1	1.83	0.05	-3.68	8.15e-06	0.000226	yes	down	_	_	_
c80664_g1	20.03	630.78	4.97	8.19e-06	0.000226	yes	up	_	_	_
c52821_g1	2.75	0.24	-3.06	8.21e-06	0.000227	yes	down	_	_	_
c63727_g1	4.82	38.22	2.96	8.22e-06	0.000227	yes	up	K00799	GST, gst	path:ko00480;path:ko00980;path:ko00982;path:ko05204
c70192_g2	0.27	4.9	3.76	8.25e-06	0.000228	yes	up	_	_	_
c42091_g1	0.33	3.35	3.02	8.27e-06	0.000228	yes	up	_	_	_
c68641_g2	0.02	5.35	5.45	8.32e-06	0.000229	yes	up	K10706	SETX, ALS4	_
c64584_g2	0	5.6	5.83	8.33e-06	0.000229	yes	up	_	_	_
c65236_g3	29.7	7.04	-2.06	8.45e-06	0.000232	yes	down	K00058	serA, PHGDH	path:ko00260;path:ko00680;path:ko01100;path:ko01120;path:ko01130;path:ko01200;path:ko01230
c63739_g1	10.9	50.74	2.21	8.46e-06	0.000232	yes	up	_	_	_
c70357_g4	1.36	23.21	3.99	8.58e-06	0.000236	yes	up	K04077	groEL, HSPD1	path:ko03018;path:ko04212;path:ko04940;path:ko05134;path:ko05152
c69721_g1	0.6	4.88	2.83	8.6e-06	0.000236	yes	up	_	_	_
c71860_g1	0.79	32.25	5.18	8.68e-06	0.000238	yes	up	_	_	_
c69615_g3	3.18	24.81	2.92	8.68e-06	0.000238	yes	up	_	_	_
c47870_g2	14.75	1.28	-3.43	8.71e-06	0.000238	yes	down	_	_	_
c71229_g3	0	4.45	5.51	8.74e-06	0.000239	yes	up	K13356	FAR	path:ko00073;path:ko04146;path:ko04212
c49293_g1	52.9	311.84	2.56	8.74e-06	0.000239	yes	up	K00799	GST, gst	path:ko00480;path:ko00980;path:ko00982;path:ko05204
c69569_g11	0	2.76	4.84	8.81e-06	0.00024	yes	up	_	_	_
c4859_g2	6.36	0.28	-4.07	8.82e-06	0.00024	yes	down	K00430	E1.11.1.7	path:ko00940;path:ko01100;path:ko01110
c68749_g1	0	3.85	5.3	8.83e-06	0.00024	yes	up	_	_	_
c51719_g1	0.24	10.34	4.95	8.88e-06	0.000242	yes	up	_	_	_
c59338_g1	0.77	71.09	6.35	8.89e-06	0.000242	yes	up	_	_	_
c39233_g1	15.99	3.3	-2.24	8.9e-06	0.000242	yes	down	K04077	groEL, HSPD1	path:ko03018;path:ko04212;path:ko04940;path:ko05134;path:ko05152
c59369_g2	15.1	0.39	-4.95	8.96e-06	0.000243	yes	down	_	_	_
c70774_g2	6.74	0.33	-3.99	8.97e-06	0.000243	yes	down	_	_	_
c53829_g1	5.24	0	-5.74	9e-06	0.000244	yes	down	_	_	_
c47849_g1	0	5.87	5.9	9.01e-06	0.000244	yes	up	_	_	_
c96552_g1	0	11.65	6.88	9.02e-06	0.000244	yes	up	_	_	_
c73235_g1	5.61	0.06	-5.15	9.05e-06	0.000244	yes	down	_	_	_
c49584_g1	2.88	0.04	-4.45	9.06e-06	0.000244	yes	down	_	_	_
c54030_g1	0.27	7.14	4.27	9.06e-06	0.000244	yes	up	_	_	_
c94500_g1	0	3.06	4.98	9.07e-06	0.000244	yes	up	_	_	_
c67483_g1	0	6.7	6.09	9.13e-06	0.000246	yes	up	_	_	_
c65457_g2	0	1.86	4.29	9.17e-06	0.000247	yes	up	_	_	_
c45543_g6	28.26	2.58	-3.4	9.26e-06	0.000249	yes	down	_	_	_
c71130_g3	0.98	11.98	3.48	9.3e-06	0.00025	yes	up	_	_	_
c58369_g3	0.49	11.97	4.36	9.37e-06	0.000251	yes	up	_	_	_
c71994_g1	13.61	0.76	-3.99	9.43e-06	0.000253	yes	down	_	_	_
c38164_g2	1.43	0	-3.94	9.44e-06	0.000253	yes	down	_	_	_
c75151_g1	0	12.14	6.94	9.44e-06	0.000253	yes	up	_	_	_
c70375_g1	0.69	17.18	4.46	9.54e-06	0.000255	yes	up	_	_	_
c70923_g1	0.28	6.09	4.02	9.57e-06	0.000256	yes	up	_	_	_
c67720_g3	0	1.49	3.99	9.61e-06	0.000257	yes	up	K13148	CPSF3L, INTS11	_
c69443_g1	0.86	14.42	3.92	9.66e-06	0.000257	yes	up	_	_	_
c67720_g9	0	2.33	4.6	9.66e-06	0.000257	yes	up	_	_	_
c71686_g5	6.13	29.12	2.23	9.66e-06	0.000257	yes	up	_	_	_
c82333_g1	0.02	1.91	4.06	9.68e-06	0.000258	yes	up	K14846	RPF1	_
c56091_g2	3.91	24.79	2.63	9.73e-06	0.000259	yes	up	_	_	_
c67001_g3	0	9.67	6.61	9.77e-06	0.00026	yes	up	_	_	_
c67306_g2	1.18	17.35	3.77	9.79e-06	0.00026	yes	up	_	_	_
c58302_g1	0	32.82	8.36	9.88e-06	0.000262	yes	up	_	_	_
c38224_g1	8.17	45.61	2.47	9.91e-06	0.000263	yes	up	_	_	_
c41662_g3	3.99	0.18	-3.86	9.93e-06	0.000263	yes	down	_	_	_
c57370_g1	1.55	0.07	-3.27	9.96e-06	0.000264	yes	down	_	_	_
c40663_g1	11.65	0	-6.88	9.98e-06	0.000264	yes	down	_	_	_
c70681_g3	16.43	1.77	-3.15	1e-05	0.000265	yes	down	_	_	_
c51408_g1	1.93	19.98	3.31	1e-05	0.000265	yes	up	_	_	_
c65692_g1	0	7.24	6.2	1.01e-05	0.000265	yes	up	_	_	_
c70480_g2	2.89	16.85	2.5	1.01e-05	0.000266	yes	up	_	_	_
c67681_g1	0.03	6.93	5.77	1.02e-05	0.000269	yes	up	_	_	_
c71784_g1	0	0.94	3.38	1.03e-05	0.000271	yes	up	_	_	_
c51244_g1	0.03	3.26	4.68	1.03e-05	0.000271	yes	up	_	_	_
c38884_g1	0	4.13	5.4	1.03e-05	0.000271	yes	up	_	_	_
c45743_g1	176.87	61.8	-1.52	1.03e-05	0.000271	yes	down	K00033	PGD, gnd, gntZ	path:ko00030;path:ko00480;path:ko01100;path:ko01110;path:ko01120;path:ko01130;path:ko01200
c72590_g1	0	14.37	7.18	1.04e-05	0.000272	yes	up	_	_	_
c59516_g1	0.04	2.92	4.4	1.04e-05	0.000272	yes	up	_	_	_
c67146_g1	25.41	5.61	-2.16	1.04e-05	0.000272	yes	down	_	_	_
c68051_g5	0.17	4.95	4.21	1.04e-05	0.000273	yes	up	_	_	_
c60923_g1	8	129.17	4	1.04e-05	0.000273	yes	up	K07437	CYP26A	path:ko00830;path:ko01100
c67976_g1	5.36	41	2.91	1.05e-05	0.000273	yes	up	_	_	_
c27360_g1	3.86	0.7	-2.31	1.05e-05	0.000274	yes	down	_	_	_
c70507_g5	0.15	33.12	7.08	1.05e-05	0.000274	yes	up	K16040	ROMT	path:ko00945
c62230_g1	8.74	0	-6.47	1.05e-05	0.000274	yes	down	_	_	_
c67980_g2	0.47	27.57	5.6	1.05e-05	0.000274	yes	up	_	_	_
c72102_g1	0	3.49	5.16	1.05e-05	0.000274	yes	up	_	_	_
c68903_g1	39.02	226.17	2.53	1.06e-05	0.000274	yes	up	_	_	_
c64728_g1	0.17	24.63	6.51	1.06e-05	0.000274	yes	up	_	_	_
c65746_g1	0.09	8.67	5.53	1.06e-05	0.000274	yes	up	_	_	_
c69141_g2	44.7	591.32	3.72	1.06e-05	0.000276	yes	up	K03103	MINPP1	path:ko00010;path:ko00562;path:ko01100
c69527_g1	35.41	10.52	-1.74	1.07e-05	0.000278	yes	down	_	_	_
c70562_g9	0	5.05	5.69	1.07e-05	0.000278	yes	up	_	_	_
c20371_g1	0	1.76	4.22	1.08e-05	0.000278	yes	up	_	_	_
c65651_g1	10.29	0.7	-3.69	1.08e-05	0.000279	yes	down	K08472	MLO	_
c61788_g1	0	6	5.93	1.08e-05	0.00028	yes	up	_	_	_
c47613_g1	0.15	3.73	3.94	1.09e-05	0.000281	yes	up	_	_	_
c49634_g2	0	2.39	4.64	1.09e-05	0.000281	yes	up	_	_	_
c36951_g1	0.02	1.15	3.33	1.09e-05	0.000282	yes	up	_	_	_
c65361_g1	14.16	5.01	-1.48	1.1e-05	0.000283	yes	down	K04733	IRAK4	path:ko04064;path:ko04620;path:ko04722;path:ko05133;path:ko05140;path:ko05142;path:ko05145;path:ko05152;path:ko05162;path:ko05164
c41524_g1	3.27	305.94	6.51	1.1e-05	0.000283	yes	up	K13691	SGT1	_
c95487_g1	0	27.98	8.13	1.1e-05	0.000283	yes	up	_	_	_
c64525_g2	43.56	6.05	-2.83	1.11e-05	0.000283	yes	down	_	_	_
c70973_g1	0.15	3.29	3.76	1.11e-05	0.000283	yes	up	_	_	_
c54729_g1	0.06	3.53	4.5	1.11e-05	0.000284	yes	up	_	_	_
c31653_g1	0.03	2.03	3.99	1.12e-05	0.000287	yes	up	_	_	_
c30372_g2	0	12.15	6.94	1.12e-05	0.000287	yes	up	_	_	_
c69409_g2	0.07	7.18	5.45	1.13e-05	0.000288	yes	up	_	_	_
c61718_g4	32.54	4.08	-2.97	1.13e-05	0.000289	yes	down	_	_	_
c109277_g1	2.79	21.85	2.92	1.13e-05	0.000289	yes	up	_	_	_
c33099_g1	0	1.58	4.07	1.13e-05	0.000289	yes	up	_	_	_
c70751_g1	0.05	2.75	4.26	1.15e-05	0.000294	yes	up	_	_	_
c66509_g4	0.68	5.26	2.79	1.15e-05	0.000294	yes	up	_	_	_
c72939_g1	11.95	0	-6.91	1.16e-05	0.000296	yes	down	K01114	plcC	path:ko00562;path:ko00564;path:ko00565;path:ko01100;path:ko01110;path:ko04919
c65106_g3	1.4	22.25	3.89	1.17e-05	0.000297	yes	up	_	_	_
c46042_g1	0	2.4	4.64	1.17e-05	0.000298	yes	up	_	_	_
c67655_g2	0.81	10.69	3.57	1.18e-05	0.0003	yes	up	_	_	_
c56038_g1	12.12	0	-6.93	1.18e-05	0.0003	yes	down	_	_	_
c71889_g1	2.2	13.9	2.6	1.19e-05	0.000303	yes	up	_	_	_
c66395_g1	0.03	6.49	5.68	1.2e-05	0.000303	yes	up	_	_	_
c69051_g1	0.08	1.51	3.17	1.2e-05	0.000303	yes	up	_	_	_
c47962_g4	0.01	2.53	4.58	1.2e-05	0.000303	yes	up	_	_	_
c68370_g3	1.7	0	-4.17	1.2e-05	0.000304	yes	down	_	_	_
c62150_g1	24.48	5.05	-2.26	1.21e-05	0.000305	yes	down	K00454	LOX2S	path:ko00591;path:ko00592;path:ko01100;path:ko01110
c56222_g1	46.12	290.18	2.65	1.21e-05	0.000305	yes	up	K00430	E1.11.1.7	path:ko00940;path:ko01100;path:ko01110
c48042_g1	4.18	0	-5.42	1.22e-05	0.000307	yes	down	_	_	_
c71229_g2	0.38	8.81	4.21	1.22e-05	0.000308	yes	up	K02889	RP-L21e, RPL21	path:ko03010
c32449_g2	0.18	2.76	3.35	1.23e-05	0.000308	yes	up	K09285	OVM, ANT	_
c44472_g1	0	1.49	3.99	1.23e-05	0.00031	yes	up	_	_	_
c66638_g2	0.24	5.94	4.14	1.23e-05	0.00031	yes	up	_	_	_
c67795_g1	0.07	7.37	5.43	1.23e-05	0.00031	yes	up	_	_	_
c71802_g2	0	2.6	4.75	1.24e-05	0.00031	yes	up	_	_	_
c69331_g3	0.71	31.95	5.3	1.24e-05	0.000311	yes	up	K03025	RPC6, POLR3F	path:ko00230;path:ko00240;path:ko01100;path:ko03020;path:ko04623;path:ko05169
c67218_g1	1.63	2.34	0.49	1.25e-05	0.000312	no	up	_	_	_
c53358_g1	13.58	4.53	-1.56	1.25e-05	0.000312	yes	down	_	_	_
c46345_g1	2.36	47.78	4.28	1.26e-05	0.000314	yes	up	_	_	_
c67132_g7	0.25	7.7	4.49	1.26e-05	0.000316	yes	up	_	_	_
c48963_g1	0	1.13	3.62	1.28e-05	0.000319	yes	up	K02995	RP-S8e, RPS8	path:ko03010
c71115_g2	5.67	38.88	2.76	1.28e-05	0.000319	yes	up	K13262	7-IOMT	path:ko00943
c20261_g1	0	2.1	4.46	1.28e-05	0.00032	yes	up	_	_	_
c67111_g1	4.13	30.34	2.85	1.29e-05	0.00032	yes	up	_	_	_
c67461_g1	18.22	5.06	-1.83	1.29e-05	0.000322	yes	down	K02220	CLB1_2	path:ko04011;path:ko04111
c68447_g3	0.04	2.3	4.11	1.3e-05	0.000322	yes	up	_	_	_
c56206_g1	0	6.21	5.98	1.31e-05	0.000326	yes	up	_	_	_
c70061_g2	76.21	24.38	-1.64	1.31e-05	0.000326	yes	down	K01012	bioB	path:ko00780;path:ko01100
c41521_g1	438.18	133.53	-1.71	1.32e-05	0.000328	yes	down	K00434	E1.11.1.11	path:ko00053;path:ko00480
c48279_g1	31.18	165.79	2.41	1.32e-05	0.000328	yes	up	_	_	_
c32470_g2	6.26	0	-5.99	1.33e-05	0.000328	yes	down	_	_	_
c60199_g1	4.39	0.89	-2.19	1.33e-05	0.000328	yes	down	K10406	KIFC2_3	_
c49308_g1	0.04	2.49	4.18	1.33e-05	0.000329	yes	up	_	_	_
c36721_g1	7.38	37.09	2.31	1.33e-05	0.000329	yes	up	_	_	_
c68957_g1	10.2	1.35	-2.83	1.33e-05	0.000329	yes	down	_	_	_
c8513_g1	108.7	1424.46	3.71	1.33e-05	0.000329	yes	up	_	_	_
c67951_g1	5.51	0.74	-2.74	1.34e-05	0.00033	yes	down	_	_	_
c80022_g1	0	4.16	5.41	1.35e-05	0.000332	yes	up	K10742	DNA2	path:ko03030
c64234_g1	2.18	34.42	3.92	1.35e-05	0.000333	yes	up	K00422	E1.10.3.1	path:ko00350;path:ko00950;path:ko01100;path:ko01110
c5559_g2	0	4.04	5.37	1.35e-05	0.000333	yes	up	_	_	_
c46090_g1	0	2.58	4.74	1.36e-05	0.000333	yes	up	_	_	_
c59594_g1	3.93	0	-5.33	1.36e-05	0.000334	yes	down	K13449	PR1	path:ko04075;path:ko04626
c94528_g1	12.51	0	-6.98	1.37e-05	0.000336	yes	down	_	_	_
c68381_g5	37.33	11.19	-1.73	1.38e-05	0.000337	yes	down	K15104	SLC25A11, OGC	_
c11219_g2	25.13	6.34	-1.97	1.38e-05	0.000337	yes	down	K00759	APRT, apt	path:ko00230;path:ko01100
c25737_g1	2.97	0.19	-3.41	1.38e-05	0.000337	yes	down	K08910	LHCA4	path:ko00196
c44239_g3	12.52	3.53	-1.8	1.38e-05	0.000338	yes	down	K05658	ABCB1	path:ko02010;path:ko04976;path:ko05206
c70820_g1	3.63	0	-5.22	1.39e-05	0.000339	yes	down	_	_	_
c59069_g1	0.96	0	-3.4	1.39e-05	0.00034	yes	down	_	_	_
c70783_g5	143.08	582.03	2.02	1.41e-05	0.000344	yes	up	K01177	E3.2.1.2	path:ko00500;path:ko01100
c39723_g1	0.01	2.2	4.37	1.42e-05	0.000346	yes	up	K10742	DNA2	path:ko03030
c51665_g2	0	1.09	3.57	1.42e-05	0.000347	yes	up	_	_	_
c39385_g2	6.07	0.92	-2.6	1.43e-05	0.000348	yes	down	_	_	_
c62042_g1	0	3.73	5.26	1.43e-05	0.000349	yes	up	_	_	_
c66856_g1	17.03	87.62	2.36	1.43e-05	0.000349	yes	up	K14493	GID1	path:ko04075
c79434_g1	5.58	0.04	-5.31	1.44e-05	0.000349	yes	down	K09874	NIP	_
c12133_g1	2.01	23.41	3.48	1.44e-05	0.000349	yes	up	_	_	_
c50934_g2	0.12	1.77	3.06	1.45e-05	0.000351	yes	up	K07374	TUBA	path:ko04145;path:ko04210;path:ko04540;path:ko05130
c109571_g1	0.61	0	-2.83	1.45e-05	0.000351	yes	down	_	_	_
c65164_g1	19.33	4.3	-2.14	1.45e-05	0.000351	yes	down	_	_	_
c63406_g1	2.47	0.22	-3.02	1.46e-05	0.000352	yes	down	_	_	_
c55359_g1	15.14	455.84	4.9	1.46e-05	0.000352	yes	up	_	_	_
c46413_g1	202.12	9.54	-4.39	1.48e-05	0.000357	yes	down	_	_	_
c3089_g1	0.17	10.02	5.25	1.49e-05	0.00036	yes	up	_	_	_
c47921_g1	6.78	0	-6.1	1.49e-05	0.00036	yes	down	_	_	_
c63354_g2	0	6.36	6.01	1.5e-05	0.000361	yes	up	_	_	_
c38995_g1	0	19.88	7.64	1.5e-05	0.000361	yes	up	_	_	_
c110731_g1	3.75	0.11	-4.17	1.51e-05	0.000362	yes	down	_	_	_
c45204_g1	5.21	0	-5.73	1.51e-05	0.000364	yes	down	_	_	_
c41982_g1	8.25	0	-6.38	1.52e-05	0.000366	yes	down	_	_	_
c59349_g1	21.44	3.85	-2.45	1.53e-05	0.000369	yes	down	_	_	_
c71136_g1	6.84	0.09	-5.19	1.54e-05	0.000369	yes	down	_	_	_
c71131_g4	13.63	2.71	-2.29	1.55e-05	0.000371	yes	down	K10661	MARCH6, DOA10	path:ko04141
c63662_g2	0.21	8.99	4.9	1.55e-05	0.000371	yes	up	_	_	_
c69735_g3	0.02	4.02	5.15	1.55e-05	0.000371	yes	up	_	_	_
c70648_g5	0.16	5.61	4.44	1.55e-05	0.000371	yes	up	K14638	SLC15A3_4, PHT	_
c58735_g1	0.53	13.06	4.37	1.57e-05	0.000374	yes	up	_	_	_
c71828_g3	0.07	7.92	5.57	1.57e-05	0.000374	yes	up	_	_	_
c12100_g1	0.02	1.36	3.64	1.61e-05	0.000385	yes	up	K04733	IRAK4	path:ko04064;path:ko04620;path:ko04722;path:ko05133;path:ko05140;path:ko05142;path:ko05145;path:ko05152;path:ko05162;path:ko05164
c65195_g6	5.46	41.33	2.9	1.63e-05	0.000388	yes	up	_	_	_
c30287_g1	9.66	0.9	-3.28	1.64e-05	0.000391	yes	down	_	_	_
c26711_g1	0	1.81	4.26	1.64e-05	0.000391	yes	up	K19027	ZFYVE26	_
c69933_g2	0	1.31	3.82	1.65e-05	0.000392	yes	up	_	_	_
c52622_g1	16.32	0.76	-4.26	1.65e-05	0.000392	yes	down	_	_	_
c67091_g3	0.22	8.17	4.71	1.65e-05	0.000392	yes	up	_	_	_
c40522_g2	68.92	0	-9.43	1.65e-05	0.000392	yes	down	K00108	betA, CHDH	path:ko00260;path:ko01100
c70721_g4	1.05	0.11	-2.46	1.65e-05	0.000392	yes	down	_	_	_
c67303_g3	9.98	46.28	2.2	1.65e-05	0.000392	yes	up	K16052	ynaI, mscMJ, MSL	_
c33184_g1	0.13	3.1	3.8	1.66e-05	0.000392	yes	up	_	_	_
c56385_g1	98.58	22.27	-2.14	1.68e-05	0.000397	yes	down	_	_	_
c33352_g1	9.41	0.74	-3.49	1.68e-05	0.000397	yes	down	K17338	REEP1_2_3_4	_
c15263_g1	0	14.81	7.22	1.68e-05	0.000398	yes	up	K19045	BB	_
c51027_g1	0	1.88	4.31	1.69e-05	0.000399	yes	up	K00962	pnp, PNPT1	path:ko00230;path:ko00240;path:ko03018
c94923_g1	0.13	30	7	1.7e-05	0.000402	yes	up	_	_	_
c4637_g1	0	5.01	5.68	1.71e-05	0.000403	yes	up	_	_	_
c63680_g1	4.94	0	-5.65	1.71e-05	0.000404	yes	down	_	_	_
c57724_g1	3.42	20.23	2.53	1.72e-05	0.000404	yes	up	K00511	SQLE, ERG1	path:ko00100;path:ko00909;path:ko01100;path:ko01110;path:ko01130
c65745_g1	8.65	140.96	4.01	1.72e-05	0.000405	yes	up	_	_	_
c50009_g1	0	3.87	5.31	1.74e-05	0.00041	yes	up	_	_	_
c66037_g1	0.05	3.27	4.54	1.75e-05	0.000411	yes	up	_	_	_
c67080_g1	5.89	0.85	-2.66	1.75e-05	0.000411	yes	down	_	_	_
c20201_g1	2.71	33.95	3.6	1.76e-05	0.000412	yes	up	K01537	E3.6.3.8	_
c23953_g1	16.98	4.09	-2.03	1.76e-05	0.000414	yes	down	_	_	_
c68848_g1	0.59	0	-2.78	1.79e-05	0.000419	yes	down	_	_	_
c57555_g1	0	9.09	6.52	1.79e-05	0.00042	yes	up	_	_	_
c2735_g1	0	7.63	6.27	1.79e-05	0.00042	yes	up	_	_	_
c52974_g1	0	4.18	5.42	1.8e-05	0.000421	yes	up	_	_	_
c66856_g2	13.86	72.64	2.38	1.8e-05	0.000421	yes	up	_	_	_
c68663_g3	1.22	54.57	5.38	1.81e-05	0.000423	yes	up	_	_	_
c62722_g1	8.98	1.84	-2.23	1.82e-05	0.000424	yes	down	_	_	_
c50553_g3	0.04	2.34	4.15	1.83e-05	0.000425	yes	up	_	_	_
c60835_g1	3.95	0	-5.34	1.83e-05	0.000426	yes	down	_	_	_
c60673_g2	1.86	34.75	4.15	1.84e-05	0.000428	yes	up	_	_	_
c67096_g4	140.97	36.1	-1.96	1.84e-05	0.000428	yes	down	K09338	HD-ZIP	_
c45156_g1	4.75	0.24	-3.84	1.84e-05	0.000428	yes	down	_	_	_
c46332_g1	13.17	56.75	2.1	1.84e-05	0.000428	yes	up	_	_	_
c53074_g1	2.24	0	-4.55	1.85e-05	0.000428	yes	down	_	_	_
c18522_g1	3.7	0.31	-3.2	1.85e-05	0.000429	yes	down	_	_	_
c59593_g1	30.53	605.68	4.31	1.85e-05	0.000429	yes	up	_	_	_
c80120_g1	9.64	1.06	-3.07	1.85e-05	0.000429	yes	down	_	_	_
c62634_g1	77.07	23.96	-1.68	1.86e-05	0.00043	yes	down	K00856	E2.7.1.20, ADK	path:ko00230;path:ko01100
c60263_g1	0	5.8	5.88	1.87e-05	0.000433	yes	up	_	_	_
c62779_g5	0	2.3	4.59	1.88e-05	0.000435	yes	up	_	_	_
c70782_g3	8.47	50	2.55	1.91e-05	0.00044	yes	up	_	_	_
c63080_g2	0.21	4.54	3.91	1.91e-05	0.00044	yes	up	_	_	_
c69184_g1	0.08	9.04	5.67	1.91e-05	0.00044	yes	up	_	_	_
c50015_g2	0	4.01	5.36	1.91e-05	0.00044	yes	up	_	_	_
c57055_g1	17.63	0	-7.47	1.91e-05	0.000441	yes	down	K15634	gpmB	path:ko00010;path:ko00260;path:ko00680;path:ko01100;path:ko01110;path:ko01120;path:ko01130;path:ko01200;path:ko01230
c66732_g1	167.22	1185.12	2.82	1.92e-05	0.000442	yes	up	K15404	K15404, CER1	path:ko00073;path:ko01110
c70286_g1	1.09	9.84	3.06	1.93e-05	0.000443	yes	up	_	_	_
c65936_g1	2.53	0.12	-3.61	1.94e-05	0.000444	yes	down	_	_	_
c58258_g1	2.59	0.23	-3.02	1.94e-05	0.000446	yes	down	_	_	_
c34110_g1	0.05	3.82	4.69	1.95e-05	0.000447	yes	up	_	_	_
c40393_g1	0.04	1.13	3.13	1.96e-05	0.000449	yes	up	_	_	_
c108634_g1	0.73	9.59	3.55	1.97e-05	0.000451	yes	up	_	_	_
c68718_g2	0.68	9.06	3.56	1.97e-05	0.000452	yes	up	_	_	_
c80586_g1	0.08	2	3.52	1.97e-05	0.000452	yes	up	_	_	_
c71894_g2	0.76	11.93	3.81	1.98e-05	0.000452	yes	up	_	_	_
c61649_g1	0.21	3.13	3.41	1.99e-05	0.000453	yes	up	_	_	_
c50751_g1	0.11	2.17	3.4	1.99e-05	0.000455	yes	up	_	_	_
c58326_g1	0.58	9.14	3.76	2e-05	0.000456	yes	up	_	_	_
c3630_g1	0.08	4.76	4.79	2e-05	0.000456	yes	up	_	_	_
c71688_g2	0.9	39.65	5.31	2.01e-05	0.000457	yes	up	_	_	_
c68190_g3	0	2.97	4.94	2.01e-05	0.000457	yes	up	_	_	_
c57992_g1	0.02	1.28	3.47	2.01e-05	0.000457	yes	up	_	_	_
c69760_g5	17.63	1.69	-3.31	2.02e-05	0.000459	yes	down	_	_	_
c49842_g2	9.82	1.84	-2.35	2.04e-05	0.000463	yes	down	_	_	_
c58255_g1	0.04	8.73	5.97	2.04e-05	0.000463	yes	up	_	_	_
c20507_g1	5.18	27.38	2.38	2.04e-05	0.000464	yes	up	_	_	_
c87001_g1	104.3	34.88	-1.58	2.05e-05	0.000465	yes	down	K00873	PK, pyk	path:ko00010;path:ko00230;path:ko00620;path:ko01100;path:ko01110;path:ko01120;path:ko01130;path:ko01200;path:ko01230;path:ko04922;path:ko04930;path:ko05203;path:ko05230
c65966_g1	0.47	4.98	3.16	2.05e-05	0.000465	yes	up	_	_	_
c70807_g2	6.35	51.84	3.01	2.06e-05	0.000465	yes	up	_	_	_
c71215_g2	1.06	12.03	3.39	2.07e-05	0.000467	yes	up	_	_	_
c64525_g1	31.11	5.36	-2.51	2.08e-05	0.00047	yes	down	_	_	_
c71128_g11	0	3.43	5.14	2.09e-05	0.000471	yes	up	_	_	_
c39567_g1	19.42	2.07	-3.17	2.09e-05	0.000471	yes	down	K15398	CYP86A4S	path:ko00073;path:ko01100
c62054_g1	155.41	2150.24	3.79	2.11e-05	0.000475	yes	up	K01674	cah	path:ko00910
c54305_g1	1.48	0.1	-2.95	2.12e-05	0.000477	yes	down	_	_	_
c71453_g2	9.18	0.3	-4.55	2.12e-05	0.000478	yes	down	K01191	E3.2.1.24	path:ko00511
c56236_g1	2.07	0	-4.44	2.14e-05	0.000481	yes	down	_	_	_
c68684_g4	0	1.83	4.27	2.15e-05	0.000482	yes	up	_	_	_
c48683_g1	22.38	0	-7.81	2.15e-05	0.000483	yes	down	K16298	SCPL-IV	_
c69679_g1	0.27	23.84	6.02	2.16e-05	0.000484	yes	up	_	_	_
c60066_g2	3.08	30.09	3.25	2.18e-05	0.000488	yes	up	K08176	PHO84	_
c64807_g1	192.25	18.97	-3.33	2.19e-05	0.000489	yes	down	_	_	_
c59866_g1	0.1	3.29	4.06	2.19e-05	0.000489	yes	up	_	_	_
c94990_g1	13.5	0.53	-4.42	2.19e-05	0.000489	yes	down	_	_	_
c70261_g3	0	4.97	5.66	2.19e-05	0.000489	yes	up	_	_	_
c71620_g1	14.69	85.01	2.53	2.19e-05	0.000489	yes	up	_	_	_
c67502_g1	0.05	5.4	5.2	2.19e-05	0.000489	yes	up	_	_	_
c71263_g2	0.35	10.35	4.53	2.2e-05	0.000491	yes	up	_	_	_
c40913_g1	0	4.67	5.58	2.2e-05	0.000492	yes	up	_	_	_
c55267_g2	1.11	0	-3.6	2.22e-05	0.000495	yes	down	_	_	_
c66316_g1	1.12	0.04	-3.08	2.22e-05	0.000495	yes	down	_	_	_
c66882_g1	19.6	4.47	-2.11	2.22e-05	0.000495	yes	down	K09273	UBTF	_
c499_g1	9.66	2.79	-1.76	2.23e-05	0.000496	yes	down	_	_	_
c71180_g3	4.11	0	-5.4	2.24e-05	0.000497	yes	down	_	_	_
c109173_g1	18.51	3.95	-2.2	2.24e-05	0.000497	yes	down	_	_	_
c16968_g1	0.03	3.34	4.74	2.24e-05	0.000498	yes	up	_	_	_
c61732_g2	0.09	4.56	4.62	2.25e-05	0.0005	yes	up	_	_	_
c76373_g1	0	10.67	6.75	2.26e-05	0.0005	yes	up	_	_	_
c55680_g2	1.47	0	-3.97	2.27e-05	0.000503	yes	down	_	_	_
c70204_g1	0.4	22.45	5.5	2.28e-05	0.000504	yes	up	K01723	AOS	path:ko00592;path:ko01100;path:ko01110
c61743_g2	0.24	4.75	3.84	2.29e-05	0.000506	yes	up	K13947	PIN	_
c71818_g1	3.62	0.81	-2.03	2.3e-05	0.000509	yes	down	_	_	_
c46490_g2	780.01	5203.67	2.74	2.31e-05	0.00051	yes	up	_	_	_
c40361_g1	0.37	5.05	3.44	2.32e-05	0.000511	yes	up	K08237	E2.4.1.218	_
c65493_g8	0	2.61	4.76	2.32e-05	0.000511	yes	up	_	_	_
c37886_g1	0.07	4.6	4.77	2.32e-05	0.000511	yes	up	_	_	_
c109800_g1	3.75	0.28	-3.36	2.32e-05	0.000511	yes	down	_	_	_
c55424_g1	0.08	1.38	3.07	2.32e-05	0.000512	yes	up	_	_	_
c61797_g1	28.22	2.39	-3.51	2.33e-05	0.000513	yes	down	K13508	GPAT	path:ko00561;path:ko00564;path:ko01100;path:ko01110
c18827_g1	482.76	109.61	-2.14	2.34e-05	0.000514	yes	down	K10046	GME	path:ko00053;path:ko00520;path:ko01100;path:ko01110
c23401_g1	0.04	1.17	3.19	2.35e-05	0.000517	yes	up	_	_	_
c69758_g2	13.39	755.71	5.81	2.35e-05	0.000517	yes	up	_	_	_
c53670_g1	6.72	28.06	2.05	2.36e-05	0.000517	yes	up	_	_	_
c49036_g1	0.13	26.79	6.86	2.36e-05	0.000517	yes	up	K14638	SLC15A3_4, PHT	_
c20161_g1	1.27	0	-3.78	2.37e-05	0.00052	yes	down	_	_	_
c46020_g1	0.05	2.99	4.35	2.38e-05	0.000521	yes	up	_	_	_
c61094_g1	0	3.48	5.16	2.39e-05	0.000523	yes	up	_	_	_
c38431_g2	0.35	9	4.35	2.39e-05	0.000523	yes	up	_	_	_
c70395_g1	31.47	266.86	3.08	2.39e-05	0.000523	yes	up	K17756	FAO3	_
c562_g1	17.88	0	-7.49	2.41e-05	0.000525	yes	down	_	_	_
c69735_g2	1.79	18.07	3.26	2.45e-05	0.000534	yes	up	_	_	_
c62349_g1	5.89	0.51	-3.29	2.45e-05	0.000534	yes	down	K00588	E2.1.1.104	path:ko00360;path:ko00940;path:ko00941;path:ko00945;path:ko01100;path:ko01110
c62035_g2	0.24	33.22	6.62	2.46e-05	0.000536	yes	up	_	_	_
c70967_g2	15.1	1.22	-3.52	2.47e-05	0.000537	yes	down	_	_	_
c3801_g1	3.49	0.19	-3.63	2.47e-05	0.000537	yes	down	_	_	_
c23902_g2	0	3.55	5.19	2.47e-05	0.000537	yes	up	_	_	_
c53122_g3	0.01	1.3	3.65	2.47e-05	0.000538	yes	up	_	_	_
c34508_g1	0.34	6.9	4	2.48e-05	0.000539	yes	up	_	_	_
c65729_g1	2.34	0.03	-4.25	2.5e-05	0.000541	yes	down	_	_	_
c31757_g1	0.01	2.04	4.23	2.5e-05	0.000542	yes	up	_	_	_
c68781_g4	19.31	5.48	-1.8	2.5e-05	0.000542	yes	down	_	_	_
c65876_g1	3.35	17.83	2.38	2.51e-05	0.000542	yes	up	K15639	CYP734A1, BAS1	path:ko00905
c48305_g1	0.2	5.75	4.28	2.51e-05	0.000542	yes	up	_	_	_
c45884_g2	6.49	1.03	-2.54	2.51e-05	0.000542	yes	down	K02358	tuf, TUFM	_
c86996_g1	6.82	0.21	-4.5	2.52e-05	0.000543	yes	down	_	_	_
c62652_g1	0.36	5.23	3.55	2.54e-05	0.000548	yes	up	_	_	_
c66875_g2	0.06	2.66	4.12	2.54e-05	0.000548	yes	up	_	_	_
c57459_g2	0.47	5.26	3.22	2.56e-05	0.000553	yes	up	_	_	_
c27075_g1	29.35	9.01	-1.69	2.57e-05	0.000553	yes	down	_	_	_
c11695_g1	2.43	43.15	4.09	2.59e-05	0.000558	yes	up	_	_	_
c60840_g1	2.18	0.23	-2.79	2.6e-05	0.00056	yes	down	_	_	_
c38285_g1	0.85	7.85	3.06	2.61e-05	0.00056	yes	up	K17871	ndh1	_
c8583_g1	43.39	10.57	-2.03	2.61e-05	0.00056	yes	down	K01802	E5.2.1.8	_
c70827_g3	0	2.61	4.76	2.62e-05	0.000562	yes	up	_	_	_
c103202_g1	12.21	1.52	-2.93	2.62e-05	0.000563	yes	down	K08242	E2.1.1.143	path:ko00100;path:ko01110
c61826_g3	13.67	1.89	-2.79	2.63e-05	0.000564	yes	down	_	_	_
c5352_g1	23.08	97.99	2.08	2.64e-05	0.000565	yes	up	_	_	_
c66110_g1	1.37	27.73	4.25	2.64e-05	0.000565	yes	up	K07195	EXOC7, EXO70	path:ko04910
c70074_g1	0.48	7.38	3.7	2.65e-05	0.000566	yes	up	_	_	_
c58722_g1	12.86	0	-7.02	2.65e-05	0.000567	yes	down	_	_	_
c63171_g1	0.13	1.97	3.18	2.66e-05	0.000567	yes	up	K13248	PHOSPHO2	path:ko00750;path:ko01100
c53607_g1	13.92	293.15	4.39	2.66e-05	0.000567	yes	up	_	_	_
c60554_g1	47.77	699.84	3.87	2.66e-05	0.000568	yes	up	_	_	_
c63272_g3	0.95	13.3	3.68	2.66e-05	0.000568	yes	up	K05666	ABCC2	path:ko02010;path:ko04976
c4170_g1	176.3	59.3	-1.57	2.67e-05	0.00057	yes	down	K00026	MDH2	path:ko00020;path:ko00270;path:ko00620;path:ko00630;path:ko00710;path:ko01100;path:ko01110;path:ko01120;path:ko01130;path:ko01200
c56770_g2	0.12	2.18	3.35	2.68e-05	0.00057	yes	up	_	_	_
c59178_g1	0	3.49	5.17	2.68e-05	0.00057	yes	up	_	_	_
c41610_g2	8.32	0	-6.4	2.68e-05	0.00057	yes	down	_	_	_
c66359_g1	50.8	14.12	-1.84	2.7e-05	0.000573	yes	down	_	_	_
c34473_g1	0.51	0	-2.62	2.72e-05	0.000577	yes	down	_	_	_
c54139_g1	0	14.78	7.22	2.73e-05	0.000579	yes	up	_	_	_
c66767_g2	139.19	41.21	-1.75	2.73e-05	0.000579	yes	down	K00382	DLD, lpd, pdhD	path:ko00010;path:ko00020;path:ko00260;path:ko00280;path:ko00620;path:ko00630;path:ko00640;path:ko01100;path:ko01110;path:ko01120;path:ko01130;path:ko01200
c71426_g6	0.95	16.17	3.96	2.75e-05	0.000583	yes	up	_	_	_
c71930_g2	1.61	15.18	3.16	2.75e-05	0.000584	yes	up	_	_	_
c35163_g1	0	2.01	4.4	2.76e-05	0.000584	yes	up	K14972	PAXIP1, PTIP	_
c56723_g1	0.48	4.6	3.01	2.76e-05	0.000585	yes	up	K01595	ppc	path:ko00620;path:ko00680;path:ko00710;path:ko00720;path:ko01100;path:ko01120;path:ko01200
c69016_g1	103.21	1027.86	3.31	2.77e-05	0.000586	yes	up	K12355	REF1	path:ko00940
c69597_g6	0.2	5.24	4.14	2.78e-05	0.000587	yes	up	_	_	_
c60713_g1	11.79	0.15	-5.55	2.79e-05	0.000589	yes	down	_	_	_
c31177_g1	24.76	0.55	-5.27	2.79e-05	0.000589	yes	down	_	_	_
c32083_g1	0.02	0.91	3.08	2.81e-05	0.000593	yes	up	_	_	_
c43912_g1	0.23	5.83	4.17	2.81e-05	0.000593	yes	up	_	_	_
c49356_g1	1.8	19.22	3.34	2.82e-05	0.000593	yes	up	_	_	_
c58542_g1	0.04	15.7	6.85	2.84e-05	0.000597	yes	up	_	_	_
c48127_g1	0.59	9.36	3.77	2.84e-05	0.000597	yes	up	K06966	K06966	_
c63134_g4	2.75	0.11	-3.75	2.84e-05	0.000597	yes	down	K03696	clpC	_
c38298_g1	0.66	6.94	3.22	2.85e-05	0.000598	yes	up	_	_	_
c70757_g2	0	2.16	4.5	2.85e-05	0.000599	yes	up	_	_	_
c52117_g1	0	3.14	5.02	2.86e-05	0.0006	yes	up	_	_	_
c33437_g1	0	5.61	5.84	2.87e-05	0.000601	yes	up	_	_	_
c51314_g1	0.2	7.81	4.74	2.87e-05	0.000601	yes	up	_	_	_
c65722_g1	3.04	34.93	3.48	2.88e-05	0.000602	yes	up	_	_	_
c40279_g1	4.89	0.14	-4.36	2.88e-05	0.000602	yes	down	_	_	_
c71420_g1	3.6	21.16	2.52	2.89e-05	0.000603	yes	up	_	_	_
c55584_g1	3.89	0.69	-2.35	2.89e-05	0.000604	yes	down	_	_	_
c11367_g1	7.48	0.24	-4.48	2.9e-05	0.000605	yes	down	_	_	_
c49337_g1	0	0.48	2.53	2.91e-05	0.000607	yes	up	K10742	DNA2	path:ko03030
c53997_g1	0.07	2.35	3.83	2.93e-05	0.000611	yes	up	_	_	_
c40921_g2	1.82	0	-4.26	2.95e-05	0.000614	yes	down	K01904	4CL	path:ko00130;path:ko00360;path:ko00940;path:ko01100;path:ko01110
c51631_g1	69.21	1153.12	4.06	2.96e-05	0.000616	yes	up	_	_	_
c63498_g5	0.24	3.6	3.45	2.96e-05	0.000616	yes	up	_	_	_
c68180_g1	0	5.48	5.8	2.96e-05	0.000616	yes	up	_	_	_
c38138_g1	3.29	0	-5.08	2.96e-05	0.000616	yes	down	_	_	_
c270_g1	0.07	1.27	2.98	2.97e-05	0.000616	yes	up	_	_	_
c8608_g1	0	2.04	4.42	2.97e-05	0.000616	yes	up	_	_	_
c68258_g1	0.62	8.43	3.58	2.97e-05	0.000616	yes	up	_	_	_
c25263_g1	12.54	0	-6.98	2.98e-05	0.000616	yes	down	_	_	_
c87170_g1	39.15	176.3	2.17	2.98e-05	0.000616	yes	up	K00161	PDHA, pdhA	path:ko00010;path:ko00020;path:ko00620;path:ko01100;path:ko01110;path:ko01120;path:ko01130;path:ko01200;path:ko04066;path:ko04922;path:ko05230
c7570_g1	0	1.07	3.55	2.98e-05	0.000617	yes	up	_	_	_
c34439_g1	0.97	0	-3.42	2.99e-05	0.000618	yes	down	_	_	_
c11048_g1	8.85	0.87	-3.21	2.99e-05	0.000618	yes	down	_	_	_
c64997_g1	0.04	2.72	4.36	2.99e-05	0.000618	yes	up	_	_	_
c304_g2	0	13.15	7.05	3e-05	0.000619	yes	up	_	_	_
c51804_g1	2.22	0.23	-2.81	3e-05	0.000619	yes	down	_	_	_
c71945_g1	0.21	4.69	3.97	3e-05	0.000619	yes	up	K12619	XRN2, RAT1	path:ko03008;path:ko03018
c61679_g1	2.3	0.1	-3.56	3.01e-05	0.000619	yes	down	_	_	_
c45720_g1	0	3.63	5.22	3.01e-05	0.000619	yes	up	_	_	_
c65776_g1	40.73	204.18	2.32	3.01e-05	0.000619	yes	up	_	_	_
c69608_g2	2.48	13.85	2.44	3.01e-05	0.000619	yes	up	_	_	_
c67350_g6	6.39	35.17	2.44	3.02e-05	0.000621	yes	up	_	_	_
c51421_g1	0.1	6.13	4.94	3.02e-05	0.000621	yes	up	_	_	_
c12953_g1	2.58	0.18	-3.24	3.03e-05	0.000623	yes	down	_	_	_
c63577_g1	1.2	0.09	-2.8	3.04e-05	0.000625	yes	down	_	_	_
c71490_g4	0	3.93	5.33	3.05e-05	0.000625	yes	up	_	_	_
c66545_g2	0.44	9.6	4.16	3.05e-05	0.000625	yes	up	_	_	_
c65793_g2	10.68	0.05	-6.16	3.05e-05	0.000625	yes	down	_	_	_
c50258_g3	2.12	31.65	3.84	3.06e-05	0.000625	yes	up	K14611	SLC23A1_2, SVCT1_2	_
c5832_g1	32.11	2.33	-3.73	3.06e-05	0.000627	yes	down	_	_	_
c67400_g1	5.84	41.42	2.81	3.07e-05	0.000627	yes	up	_	_	_
c57727_g1	7.6	95.17	3.63	3.07e-05	0.000628	yes	up	_	_	_
c70682_g3	5.68	35.19	2.61	3.09e-05	0.00063	yes	up	_	_	_
c70477_g1	46.4	437.77	3.24	3.09e-05	0.00063	yes	up	K01681	ACO, acnA	path:ko00020;path:ko00630;path:ko00720;path:ko01100;path:ko01110;path:ko01120;path:ko01130;path:ko01200;path:ko01210;path:ko01230
c66649_g1	5.03	76.61	3.9	3.09e-05	0.00063	yes	up	_	_	_
c68814_g2	0.05	4.94	5.05	3.09e-05	0.00063	yes	up	_	_	_
c62629_g2	0	2.74	4.83	3.1e-05	0.000631	yes	up	K18461	WASH1	path:ko04144;path:ko04212
c61125_g1	0.15	2.44	3.33	3.11e-05	0.000632	yes	up	_	_	_
c68851_g2	13.02	2.76	-2.2	3.11e-05	0.000632	yes	down	_	_	_
c69992_g4	3.85	109.29	4.79	3.12e-05	0.000634	yes	up	_	_	_
c102635_g1	0	4.73	5.59	3.14e-05	0.000637	yes	up	_	_	_
c52421_g1	1.46	0	-3.97	3.14e-05	0.000637	yes	down	_	_	_
c65032_g2	16.41	72.37	2.13	3.14e-05	0.000637	yes	up	K09419	HSFF	_
c65027_g2	0	7.71	6.29	3.15e-05	0.000637	yes	up	K19037	ATL23	_
c51932_g2	3.01	0	-4.96	3.16e-05	0.000639	yes	down	K05863	SLC25A4S, ANT	path:ko04020;path:ko04022;path:ko05012;path:ko05016;path:ko05166
c57685_g1	26.32	0	-8.05	3.17e-05	0.000642	yes	down	K13508	GPAT	path:ko00561;path:ko00564;path:ko01100;path:ko01110
c71822_g2	0	6.24	5.99	3.2e-05	0.000647	yes	up	_	_	_
c67936_g1	0.39	4.16	3.12	3.21e-05	0.000648	yes	up	_	_	_
c56488_g2	0	0.77	3.13	3.21e-05	0.000649	yes	up	_	_	_
c67437_g2	34.45	168.45	2.29	3.22e-05	0.000649	yes	up	_	_	_
c51814_g1	0.04	0.93	2.87	3.24e-05	0.000653	yes	up	K09422	MYBP	_
c55101_g1	5.85	0.71	-2.88	3.25e-05	0.000655	yes	down	_	_	_
c62990_g2	74.13	19.6	-1.91	3.27e-05	0.000658	yes	down	_	_	_
c63752_g1	2.08	11.06	2.35	3.3e-05	0.000665	yes	up	_	_	_
c55911_g1	3.81	0	-5.29	3.3e-05	0.000665	yes	down	K01369	LGMN	path:ko04142;path:ko04612
c71771_g1	1.66	9.16	2.4	3.33e-05	0.000669	yes	up	K01534	zntA	_
c61270_g2	16.5	2.03	-2.96	3.34e-05	0.000671	yes	down	_	_	_
c51841_g1	0.07	1.06	2.75	3.35e-05	0.000672	yes	up	K12639	CYP724B1, D11	path:ko00905;path:ko01100;path:ko01110
c64767_g1	2.2	0	-4.53	3.37e-05	0.000676	yes	down	_	_	_
c67091_g1	0.04	2.09	3.96	3.39e-05	0.00068	yes	up	_	_	_
c87275_g1	0.05	4.47	4.97	3.4e-05	0.000681	yes	up	_	_	_
c21669_g1	2.84	115.28	5.29	3.4e-05	0.000681	yes	up	K14595	AOG	path:ko00906;path:ko01100;path:ko01110
c38631_g1	4.37	0.24	-3.73	3.4e-05	0.000681	yes	down	K10418	DYNLL	path:ko04962
c68579_g3	1.23	29.61	4.48	3.4e-05	0.000681	yes	up	_	_	_
c62974_g1	6.03	0	-5.94	3.41e-05	0.000682	yes	down	_	_	_
c67712_g4	0	22.64	7.83	3.42e-05	0.000683	yes	up	_	_	_
c51396_g1	0	8.43	6.42	3.43e-05	0.000685	yes	up	K00276	AOC3, AOC2, tynA	path:ko00260;path:ko00350;path:ko00360;path:ko00410;path:ko00950;path:ko00960;path:ko01100;path:ko01110
c65225_g1	2.35	0.13	-3.4	3.43e-05	0.000685	yes	down	K05298	GAPA	path:ko00710;path:ko01100;path:ko01120;path:ko01200
c48313_g1	7.29	1.12	-2.6	3.45e-05	0.000687	yes	down	K18810	CYCD1_2_4	_
c86853_g1	8.84	39.5	2.15	3.45e-05	0.000687	yes	up	K16275	BAH, NLA	_
c67564_g1	9.11	2.19	-2.01	3.45e-05	0.000687	yes	down	_	_	_
c63064_g4	1.11	0	-3.6	3.45e-05	0.000687	yes	down	_	_	_
c71412_g2	24.25	6.92	-1.8	3.47e-05	0.00069	yes	down	_	_	_
c95206_g1	0.03	2.77	4.48	3.48e-05	0.000692	yes	up	_	_	_
c65037_g1	2.82	58.66	4.33	3.5e-05	0.000696	yes	up	K07088	K07088	_
c34394_g3	0.09	1.8	3.36	3.52e-05	0.000698	yes	up	K11838	USP7, UBP15	path:ko04068;path:ko05168;path:ko05169;path:ko05203
c48297_g1	0.08	2.68	3.94	3.52e-05	0.000698	yes	up	_	_	_
c55613_g1	0	6.17	5.97	3.52e-05	0.000698	yes	up	_	_	_
c45401_g1	4.29	0	-5.46	3.52e-05	0.000698	yes	down	_	_	_
c49036_g3	0.13	18.85	6.36	3.53e-05	0.0007	yes	up	K14638	SLC15A3_4, PHT	_
c69923_g7	2.42	0	-4.66	3.54e-05	0.0007	yes	down	_	_	_
c46878_g1	0.77	0	-3.13	3.54e-05	0.000701	yes	down	_	_	_
c32927_g1	0.12	2.42	3.53	3.55e-05	0.000702	yes	up	_	_	_
c28072_g1	0.5	10.36	4.12	3.56e-05	0.000704	yes	up	_	_	_
c66425_g1	82.46	2.34	-5.08	3.57e-05	0.000705	yes	down	_	_	_
c39895_g2	6.23	69.73	3.46	3.59e-05	0.000708	yes	up	_	_	_
c67510_g1	0.19	4.24	3.9	3.59e-05	0.000708	yes	up	_	_	_
c112599_g1	7.32	0.26	-4.37	3.6e-05	0.000709	yes	down	_	_	_
c424_g1	0	2.31	4.59	3.62e-05	0.000713	yes	up	_	_	_
c68463_g1	59.17	7.7	-2.93	3.64e-05	0.000717	yes	down	_	_	_
c54637_g1	0.24	5.45	4.04	3.65e-05	0.000717	yes	up	_	_	_
c56688_g3	1.27	0.13	-2.55	3.65e-05	0.000717	yes	down	_	_	_
c65417_g3	2.99	14.21	2.21	3.65e-05	0.000717	yes	up	K03327	TC.MATE, SLC47A, norM, mdtK, dinF	_
c62745_g4	3.34	0.36	-2.9	3.67e-05	0.000721	yes	down	K09338	HD-ZIP	_
c71239_g2	0.89	0.02	-3.01	3.68e-05	0.000723	yes	down	_	_	_
c70028_g4	1.12	16.42	3.76	3.69e-05	0.000723	yes	up	_	_	_
c66162_g1	13.67	4.64	-1.54	3.72e-05	0.000729	yes	down	_	_	_
c51838_g1	0.62	14.64	4.36	3.72e-05	0.000729	yes	up	_	_	_
c52179_g3	0.21	8.15	4.75	3.74e-05	0.000731	yes	up	_	_	_
c60025_g1	4.16	0.36	-3.21	3.74e-05	0.000732	yes	down	_	_	_
c63557_g1	1	0	-3.46	3.74e-05	0.000732	yes	down	_	_	_
c29005_g1	0.46	5.31	3.27	3.75e-05	0.000732	yes	up	_	_	_
c55620_g2	21.08	226.85	3.42	3.75e-05	0.000732	yes	up	_	_	_
c61805_g2	0	2.96	4.94	3.78e-05	0.000737	yes	up	_	_	_
c67130_g1	1.8	16.43	3.12	3.79e-05	0.000739	yes	up	_	_	_
c69508_g1	0.46	7.64	3.78	3.8e-05	0.000741	yes	up	K10706	SETX, ALS4	_
c71095_g8	4.45	0.52	-2.88	3.8e-05	0.000741	yes	down	_	_	_
c61501_g1	0.59	13.89	4.34	3.81e-05	0.000742	yes	up	_	_	_
c69812_g3	1.95	0.06	-3.71	3.83e-05	0.000746	yes	down	_	_	_
c70442_g1	0.16	4.15	4.04	3.85e-05	0.000749	yes	up	_	_	_
c65804_g1	0.02	1.32	3.56	3.87e-05	0.000752	yes	up	_	_	_
c61235_g1	0.9	10.75	3.43	3.87e-05	0.000752	yes	up	_	_	_
c60744_g1	106.34	12.37	-3.09	3.89e-05	0.000754	yes	down	_	_	_
c52279_g3	1.57	0	-4.06	3.96e-05	0.000768	yes	down	_	_	_
c48986_g2	0.24	5.14	3.96	3.96e-05	0.000768	yes	up	K09286	EREBP	_
c77344_g1	0.04	1.75	3.71	3.97e-05	0.000769	yes	up	_	_	_
c60487_g1	0.12	5.56	4.71	4e-05	0.000774	yes	up	_	_	_
c70093_g1	0.3	4.27	3.44	4e-05	0.000774	yes	up	_	_	_
c47056_g1	57.3	265.68	2.21	4.01e-05	0.000775	yes	up	K01610	E4.1.1.49, pckA	path:ko00010;path:ko00020;path:ko00620;path:ko00710;path:ko01100;path:ko01110;path:ko01120;path:ko01130;path:ko01200
c52387_g1	7.94	0	-6.33	4.02e-05	0.000776	yes	down	K00128	E1.2.1.3	path:ko00010;path:ko00040;path:ko00053;path:ko00071;path:ko00280;path:ko00310;path:ko00330;path:ko00340;path:ko00380;path:ko00410;path:ko00561;path:ko00620;path:ko00625;path:ko00903;path:ko01100;path:ko01110;path:ko01120;path:ko01130
c67944_g7	52.26	13.74	-1.92	4.04e-05	0.000779	yes	down	_	_	_
c72440_g1	0	1.08	3.56	4.04e-05	0.000779	yes	up	_	_	_
c57221_g3	4.81	78.29	4	4.05e-05	0.000781	yes	up	_	_	_
c52837_g1	0.2	3.04	3.39	4.05e-05	0.000781	yes	up	K09285	OVM, ANT	_
c68677_g6	5.27	139.44	4.7	4.06e-05	0.000781	yes	up	_	_	_
c67596_g1	0.07	2.56	3.94	4.06e-05	0.000781	yes	up	_	_	_
c63041_g1	7	30.08	2.09	4.09e-05	0.000786	yes	up	_	_	_
c49442_g1	11	1.14	-3.16	4.12e-05	0.000792	yes	down	_	_	_
c95702_g1	2.62	0.25	-2.98	4.13e-05	0.000793	yes	down	_	_	_
c69801_g2	0.46	5.8	3.4	4.16e-05	0.000798	yes	up	_	_	_
c58614_g1	13.44	1.73	-2.89	4.19e-05	0.000803	yes	down	_	_	_
c69873_g5	4.25	0.34	-3.31	4.19e-05	0.000803	yes	down	_	_	_
c64724_g3	5.02	0.96	-2.27	4.19e-05	0.000803	yes	down	_	_	_
c57921_g1	0.01	1.81	4.06	4.19e-05	0.000803	yes	up	K08238	XXT	_
c5790_g1	0.05	1.26	3.22	4.2e-05	0.000804	yes	up	_	_	_
c68656_g4	1.82	54.92	4.84	4.2e-05	0.000805	yes	up	_	_	_
c67819_g1	0.45	6.01	3.48	4.22e-05	0.000806	yes	up	_	_	_
c79458_g1	37.16	160.53	2.11	4.22e-05	0.000807	yes	up	K01904	4CL	path:ko00130;path:ko00360;path:ko00940;path:ko01100;path:ko01110
c64865_g8	69.73	22.75	-1.61	4.23e-05	0.000808	yes	down	K00966	GMPP	path:ko00051;path:ko00520;path:ko01100;path:ko01110
c56768_g1	1.71	0	-4.17	4.24e-05	0.000809	yes	down	_	_	_
c55778_g1	1.15	17.16	3.78	4.26e-05	0.000813	yes	up	K03834	tyrP	_
c8650_g1	5.06	0.66	-2.76	4.3e-05	0.000819	yes	down	_	_	_
c43693_g1	0.28	4.75	3.66	4.31e-05	0.000821	yes	up	_	_	_
c63498_g1	0.15	4.21	4.1	4.32e-05	0.000823	yes	up	_	_	_
c57937_g2	0	6.72	6.09	4.35e-05	0.000828	yes	up	K10691	UBR4, ZUBR1	path:ko05203
c68679_g2	0.33	5.3	3.65	4.36e-05	0.000829	yes	up	_	_	_
c55619_g1	19.83	6.11	-1.68	4.4e-05	0.000836	yes	down	K14494	DELLA	path:ko04075
c47818_g2	1.67	0.07	-3.39	4.42e-05	0.00084	yes	down	_	_	_
c51671_g1	0.1	1.91	3.3	4.42e-05	0.00084	yes	up	_	_	_
c62384_g1	0.44	4.24	3.01	4.43e-05	0.00084	yes	up	_	_	_
c67190_g7	1.05	0.05	-2.95	4.43e-05	0.00084	yes	down	_	_	_
c47531_g1	8.86	0.82	-3.29	4.43e-05	0.00084	yes	down	_	_	_
c64449_g1	6.32	0.88	-2.71	4.44e-05	0.00084	yes	down	_	_	_
c60658_g1	0.09	2.05	3.5	4.44e-05	0.00084	yes	up	_	_	_
c68401_g6	18.91	72.49	1.93	4.45e-05	0.000841	yes	up	_	_	_
c27180_g1	2.55	0.19	-3.21	4.45e-05	0.000842	yes	down	_	_	_
c54076_g1	0.55	0.02	-2.47	4.45e-05	0.000842	yes	down	K04120	E5.5.1.13	path:ko00904;path:ko01100;path:ko01110
c48019_g1	0.11	4.58	4.48	4.46e-05	0.000842	yes	up	_	_	_
c66875_g1	0	5.59	5.83	4.46e-05	0.000843	yes	up	_	_	_
c62227_g1	17.39	0.62	-4.59	4.47e-05	0.000843	yes	down	_	_	_
c45352_g1	3	59.69	4.27	4.5e-05	0.000848	yes	up	_	_	_
c60401_g1	10.11	1.86	-2.38	4.5e-05	0.000848	yes	down	_	_	_
c66708_g4	3.05	0.31	-2.96	4.5e-05	0.000848	yes	down	_	_	_
c60026_g1	44.9	251.89	2.49	4.51e-05	0.000848	yes	up	_	_	_
c20508_g1	0	2.31	4.59	4.51e-05	0.000848	yes	up	_	_	_
c59282_g1	0.22	3.78	3.6	4.54e-05	0.000854	yes	up	_	_	_
c60989_g1	0.15	2.06	3.14	4.55e-05	0.000854	yes	up	_	_	_
c70387_g1	0.08	1.61	3.24	4.55e-05	0.000854	yes	up	_	_	_
c63016_g4	1.63	21.34	3.63	4.55e-05	0.000854	yes	up	_	_	_
c55981_g1	145.78	24.46	-2.57	4.58e-05	0.000859	yes	down	_	_	_
c67834_g1	247.31	19.99	-3.62	4.59e-05	0.00086	yes	down	_	_	_
c9199_g1	0.04	1.57	3.59	4.59e-05	0.00086	yes	up	_	_	_
c54879_g1	172.18	55.81	-1.62	4.6e-05	0.000861	yes	down	K02942	RP-LP1, RPLP1	path:ko03010
c57937_g1	0	4.28	5.45	4.61e-05	0.000861	yes	up	_	_	_
c56683_g1	0	2.38	4.63	4.61e-05	0.000861	yes	up	_	_	_
c16268_g1	13.19	152.82	3.52	4.61e-05	0.000861	yes	up	_	_	_
c59862_g1	0.06	3.29	4.37	4.62e-05	0.000864	yes	up	_	_	_
c55509_g2	0.05	3.84	4.73	4.64e-05	0.000866	yes	up	_	_	_
c60835_g8	6.23	0	-5.99	4.66e-05	0.000868	yes	down	_	_	_
c66609_g2	1.54	18.46	3.5	4.66e-05	0.000868	yes	up	_	_	_
c88150_g1	37.83	5.81	-2.68	4.66e-05	0.000869	yes	down	_	_	_
c61891_g1	17.49	3.8	-2.17	4.67e-05	0.000869	yes	down	K03644	lipA	path:ko00785;path:ko01100
c52926_g2	107.03	17.6	-2.6	4.67e-05	0.000869	yes	down	_	_	_
c64845_g1	1.19	12.51	3.28	4.7e-05	0.000874	yes	up	_	_	_
c55566_g1	0.03	3.7	4.92	4.7e-05	0.000874	yes	up	_	_	_
c67336_g2	58.19	12.46	-2.21	4.71e-05	0.000875	yes	down	_	_	_
c62118_g1	0.07	3.63	4.41	4.75e-05	0.000882	yes	up	_	_	_
c61504_g3	0.02	2.12	4.25	4.76e-05	0.000883	yes	up	_	_	_
c68401_g1	1.8	0	-4.25	4.77e-05	0.000884	yes	down	K15287	SLC35F1_2	_
[truncated: 61,357 more rows]
