# Supplementary material for: Transcriptome analysis of Chelidonium majus elaiosomes and seeds provide insights into fatty acid biosynthesis
Source: PeerJ. 2019 May 3;7:e6871. doi: 10.7717/peerj.6871 (PMC6501766; doi:10.7717/peerj.6871)
Supplement: Supplemental Information 2 — (√) represents significantly regulated genes. [file peerj-07-6871-s002.xlsx]

## Sheet: Sheet1
seq_id	Gene_ID	GENE	GENE_NAME	ENZYME	KEGG_PATHWAY	Ch01vsCh02	Ch02vsCh03	Ch03vsCh04
c36851_g2	K07513	ACAA1	acetyl-CoA acyltransferase 1	EC 2.3.1.16	path:ko01040	up-regulated	up-regulated	up-regulated（√）
c57157_g1	K01962	Accase (accA)	acetyl-CoA carboxylase	EC 6.4.1.2	path:ko00061	down-regulated	up-regulated（√）	down-regulated（√）
c70605_g3	K02160	Accase (accB)	acetyl-CoA carboxylase	EC 6.4.1.2	path:ko00061	up-regulated	up-regulated（√）	up-regulated
c70605_g1	K02160	Accase (accB)	acetyl-CoA carboxylase	EC 6.4.1.2	path:ko00061	up-regulated	up-regulated（√）	up-regulated
c101338_g1	K02160	Accase (accB)	acetyl-CoA carboxylase	EC 6.4.1.2	path:ko00061	down-regulated	up-regulated（√）	down-regulated（√）
c66997_g6	K01961	Accase (accC)	acetyl-CoA carboxylase	EC 6.4.1.2	path:ko00061	down-regulated	up-regulated（√）	down-regulated（√）
c70653_g4	K01963	Accase (accD)	acetyl-CoA carboxylase	EC 6.4.1.2	path:ko00061	up-regulated	up-regulated（√）	down-regulated（√）
c62119_g1	K00232	ACOX1	acyl-CoA oxidase	EC 1.3.3.6	path:ko01040	up-regulated（√）	down-regulated	up-regulated（√）
c67981_g3	K01897	ACSL	acyl coenzyme A synthetase	EC 6.2.1.3	path:ko00061	up-regulated	up-regulated	down-regulated（√）
c57176_g1	K01897	ACSL	acyl coenzyme A synthetase	EC 6.2.1.3	path:ko00061	up-regulated	up-regulated	up-regulated（√）
c41670_g3	K01897	ACSL	acyl coenzyme A synthetase	EC 6.2.1.3	path:ko00061	down-regulated	up-regulated	up-regulated（√）
c108838_g1	K01897	ACSL	acyl coenzyme A synthetase	EC 6.2.1.3	path:ko00061	down-regulated	up-regulated（√）	down-regulated（√）
c8588_g1	K03921	DESA1	acyl carrier protein desaturase	EC 1.14.19.2	path:ko00061;path:ko01040	down-regulated	up-regulated（√）	down-regulated
c66303_g2	K03921	DESA1	acyl carrier protein desaturase	EC 1.14.19.2	path:ko00061;path:ko01040	up-regulated（√）	up-regulated（√）	down-regulated
c68300_g1	K00645	fabD	acyl-carrier-protein S-malonyltransferase	EC 2.3.1.39	path:ko00061	down-regulated	up-regulated（√）	down-regulated（√）
c87084_g1	K09458	fabF	β-ketoacyl–acyl carrier protein synthase II	EC 2.3.1.179	path:ko00061	down-regulated	up-regulated（√）	down-regulated（√）
c79527_g1	K09458	fabF	β-ketoacyl–acyl carrier protein synthase II	EC 2.3.1.179	path:ko00061	up-regulated（√）	up-regulated（√）	down-regulated（√）
c64835_g2	K09458	fabF	β-ketoacyl–acyl carrier protein synthase II	EC 2.3.1.179	path:ko00061	down-regulated	up-regulated（√）	up-regulated
c56516_g1	K09458	fabF	β-ketoacyl–acyl carrier protein synthase II	EC 2.3.1.179	path:ko00061	down-regulated	up-regulated（√）	down-regulated（√）
c60262_g1	K00059	fabG	malonyl CoA-ACP transacylase	EC 1.1.1.100	path:ko00061;path:ko01040	up-regulated（√）	down-regulated（√）	up-regulated
c46157_g1	K00059	fabG	malonyl CoA-ACP transacylase	EC 1.1.1.100	path:ko00061;path:ko01040	down-regulated	up-regulated	up-regulated（√）
c420_g1	K00059	fabG	malonyl CoA-ACP transacylase	EC 1.1.1.100	path:ko00061;path:ko01040	down-regulated	up-regulated（√）	down-regulated（√）
c57289_g1	K00208	fabI	enoyl-[acyl-carrier-protein] reductase	EC 1.3.1.10	path:ko00061	down-regulated	up-regulated（√）	down-regulated（√）
c71649_g1	K02372	fabZ	β-hydroxyacyl-acyl carrier protein dehydratases	EC 4.2.1.59	path:ko00061	up-regulated	up-regulated（√）	down-regulated
c38597_g1	K10256	FAD2	acyl-lipid omega-6 desaturase (Delta-12 desaturase) (FAD2)	EC 1.14.19.22	path:ko01040	down-regulated	up-regulated（√）	up-regulated
c36774_g1	K10257	FAD8	acyl-lipid omega-3 desaturase	EC 1.14.19.35	path:ko01040	down-regulated	down-regulated（√）	up-regulated（√）
c27119_g1	K10257	FAD8	acyl-lipid omega-3 desaturase	EC 1.14.19.35	path:ko01040	up-regulated	down-regulated（√）	down-regulated
c69019_g4	K10782	FATA	acyl-ACP thioesterase A	EC 3.1.2.14	path:ko00061	down-regulated	up-regulated（√）	down-regulated
c67179_g1	K10781	FATB	acyl-ACP thioesterase B	EC 3.1.2.14	path:ko00061	no changed	no changed	up-regulated（√）
c61610_g1	K10781	FATB	acyl-ACP thioesterase B	EC 3.1.2.14	path:ko00061	down-regulated	up-regulated（√）	down-regulated
c94561_g1	K00507	SCD	Delta9-desaturase	EC 1.14.19.1	path:ko01040	down-regulated	down-regulated（√）	no changed
c82822_g1	K00507	SCD	Delta9-desaturase	EC 1.14.19.1	path:ko01040	down-regulated	down-regulated（√）	no changed
c63525_g2	K00507	SCD	stearoyl-CoA desaturase (Delta-9 desaturase)	EC 1.14.19.1	path:ko01040	up-regulated	up-regulated（√）	up-regulated
c50951_g1	K00507	SCD	Delta9-desaturase	EC 1.14.19.1	path:ko01040	up-regulated	down-regulated（√）	down-regulated（√）
c41598_g3	K00507	SCD	Delta9-desaturase	EC 1.14.19.1	path:ko01040	up-regulated	up-regulated	up-regulated（√）
c41598_g2	K00507	SCD	Delta9-desaturase	EC 1.14.19.1	path:ko01040	up-regulated	up-regulated	up-regulated（√）
c41598_g1	K00507	SCD	Delta9-desaturase	EC 1.14.19.1	path:ko01040	up-regulated	up-regulated	up-regulated（√）
c36707_g1	K00507	SCD	stearoyl-CoA desaturase (Delta-9 desaturase)	EC 1.14.19.1	path:ko01040	down-regulated	up-regulated（√）	up-regulated
c31418_g2	K00507	SCD	stearoyl-CoA desaturase (Delta-9 desaturase)	EC 1.14.19.1	path:ko01040	no changed	up-regulated（√）	down-regulated（√）
c31418_g1	K00507	SCD	stearoyl-CoA desaturase (Delta-9 desaturase)	EC 1.14.19.1	path:ko01040	no changed	up-regulated（√）	down-regulated（√）
c55028_g1	K10258	TER	very-long-chain enoyl-CoA reductase	EC 1.3.1.93	path:ko01040	up-regulated	down-regulated（√）	no changed
